# Supplementary material for: Liver X Receptor activation protects Huntington’s disease knock-in mice from behavioral and neuropathological impairments
Source: Research Square preprint supplement (doi:10.21203/rs.3.rs-8155849/v1), 2025-12-01
Supplement: Supplementary file 1 [file c0d78b62fe17b6ffc90e04a7.xlsx]

## Sheet: Metadata
# This is a metadata template for submission of high-throughput sequencing samples to the GEO database.
# Before filling out the template, we highly recommend reviewing the appropriate EXAMPLE template(s) found on tabs of this Excel file (see bottom).
# Fields with a red triangle in the upper-right corner have pop-up instructions that can be displayed if you hover over the field.
# Invalid duplicate entries will be auto-highlighted. Please correct. For example, library name, title, raw file entries must be unique.
STUDY
# This section describes the overall study.
# Information provided in this section will be displayed in a GEO Series record (GSExxxxxx) on a public web page.
# STUDY information must be listed in column B. Add more rows, if needed. Do not place text in column C or beyond.
*title	Beneficial effect of Liver X Receptor activation on behavioral and neuropathological impairment in a Huntington’s disease mouse model
*summary (abstract)	Evaluation of the effect of a pharmacological LXR activation using T0901317 chronic treatment on HD behavioral alterations, transcriptomic regulations and neuropathology.
*experimental design	RNAsreq were generated using striatrum and Hippocampus from WT, HD (HET) and HD treated with T0901317 (HET+T0) in resting condition (home cage) at 8,5 month old after behavioral assessments (locomotion, cognition, social and depressive-like behaviour)
contributor	Sandrine, Betuing
contributor	Coline, Mounier
contributor	Katleen, Pinchaud
contributor	Cameron, Hery
contributor	Maialen, Arrieta-Lobo
contributor	Weixuan, Xue
contributor	Laurent, Le Corre
contributor	Cloé, Mendoza
contributor	Silvia, Friedrichs
contributor	Sofia, Bergh
contributor	Jean-François, Gilles
contributor	Maura, Marinozzi
contributor	Nicolas, Heck
contributor	Åsa, Petersén
contributor	Dieter, Lütjohann
contributor	Ludovic, Tricoire
contributor	Nicolas, Pietrancosta
contributor	Céline, Baligand
contributor	Carole, Escartin
contributor	Peter, Vanhoutte
contributor	Jocelyne, Caboche
contributor	Christian, Neri
contributor
contributor
supplementary file
SAMPLES
# Information provided in this section will be displayed in GEO Sample records (GSMxxxxxxx) on public web pages.
# A GEO Sample record will be created from each row in this section.
# Biological replicates of the same sample: If provided, should be listed on different rows and titled accordingly (biol rep 1, biol rep 2, and so on).
# Technical replicates, eg, the same libraries were run in different lanes of a flow cell or sequenced multiple times: If provided, list all raw files in the same row, adding more "raw file" columns as needed to accommodate all raw files.
# One library per row. All library names, titles and raw files must be unique.
*library name	*title	*library strategy	*organism	**tissue	**cell line	**cell type	genotype	treatment	batch	*molecule	*single or paired-end	*instrument model	description	processed data file	processed data file	raw file	raw file
Sample 1	WT_ST_13_biorep1	RNA-seq	Mus Musculus	STRIATUM			WT	Methylcellulose		polyA RNA	paired-end	Illumina novaseq 6000	Column name in All_counts_in_same_file.csv: ST_WT_13st	All_counts_in_same_file.csv		13st-1_S1_R1_001.fastq.gz	13st-1_S1_R2_001.fastq.gz
Sample 2	WT_ST_14_biorep1	RNA-seq	Mus Musculus	STRIATUM			WT	Methylcellulose		polyA RNA	paired-end	Illumina novaseq 6000	Column name in All_counts_in_same_file.csv: ST_WT_14st	All_counts_in_same_file.csv		14st-1_S2_R1_001.fastq.gz	14st-1_S2_R2_001.fastq.gz
Sample 3	WT_ST_16_biorep1	RNA-seq	Mus Musculus	STRIATUM			WT	Methylcellulose		polyA RNA	paired-end	Illumina novaseq 6000	Column name in All_counts_in_same_file.csv: ST_WT_16st	All_counts_in_same_file.csv		16st-1_S3_R1_001.fastq.gz	16st-1_S3_R2_001.fastq.gz
Sample 4	WT_ST_17_biorep1	RNA-seq	Mus Musculus	STRIATUM			WT	Methylcellulose		polyA RNA	paired-end	Illumina novaseq 6000	Column name in All_counts_in_same_file.csv: ST_WT_17st	All_counts_in_same_file.csv		17st-1_S4_R1_001.fastq.gz	17st-1_S4_R2_001.fastq.gz
Sample 5	WT_ST_22_biorep1	RNA-seq	Mus Musculus	STRIATUM			WT	Methylcellulose		polyA RNA	paired-end	Illumina novaseq 6000	Column name in All_counts_in_same_file.csv: ST_WT_22st	All_counts_in_same_file.csv		22st-1_S5_R1_001.fastq.gz	22st-1_S5_R2_001.fastq.gz
Sample 6	WT_ST_13_biorep2	RNA-seq	Mus Musculus	STRIATUM			WT	Methylcellulose		polyA RNA	paired-end	Illumina novaseq 6000	Column name in All_counts_in_same_file.csv: ST_WT_13st	All_counts_in_same_file.csv		13st-2_S9_R1_001.fastq.gz	13st-2_S9_R2_001.fastq.gz
Sample 7	WT_ST_14_biorep2	RNA-seq	Mus Musculus	STRIATUM			WT	Methylcellulose		polyA RNA	paired-end	Illumina novaseq 6000	Column name in All_counts_in_same_file.csv: ST_WT_14st	All_counts_in_same_file.csv		14st-2_S10_R1_001.fastq.gz	14st-2_S10_R2_001.fastq.gz
Sample 8	WT_ST_16_biorep2	RNA-seq	Mus Musculus	STRIATUM			WT	Methylcellulose		polyA RNA	paired-end	Illumina novaseq 6000	Column name in All_counts_in_same_file.csv: ST_WT_16st	All_counts_in_same_file.csv		16st-2_S11_R1_001.fastq.gz	16st-2_S11_R2_001.fastq.gz
Sample 9	WT_ST_17_biorep2	RNA-seq	Mus Musculus	STRIATUM			WT	Methylcellulose		polyA RNA	paired-end	Illumina novaseq 6000	Column name in All_counts_in_same_file.csv: ST_WT_17st	All_counts_in_same_file.csv		17st-2_S12_R1_001.fastq.gz	17st-2_S12_R2_001.fastq.gz
Sample 10	WT_ST_22_biorep2	RNA-seq	Mus Musculus	STRIATUM			WT	Methylcellulose		polyA RNA	paired-end	Illumina novaseq 6000	Column name in All_counts_in_same_file.csv: ST_WT_22st	All_counts_in_same_file.csv		22st-2_S13_R1_001.fastq.gz	22st-2_S13_R2_001.fastq.gz
Sample 11	HET_ST_12_biorep1	RNA-seq	Mus Musculus	STRIATUM			HD	Methylcellulose		polyA RNA	paired-end	Illumina novaseq 6000	Column name in All_counts_in_same_file.csv: ST_HET_12st	All_counts_in_same_file.csv		12st-1_S6_R1_001.fastq.gz	12st-1_S6_R2_001.fastq.gz
Sample 12	HET_ST_19_biorep1	RNA-seq	Mus Musculus	STRIATUM			HD	Methylcellulose		polyA RNA	paired-end	Illumina novaseq 6000	Column name in All_counts_in_same_file.csv: ST_HET_19st	All_counts_in_same_file.csv		19st-1_S7_R1_001.fastq.gz	19st-1_S7_R2_001.fastq.gz
Sample 13	HET_ST_105_biorep1	RNA-seq	Mus Musculus	STRIATUM			HD	Methylcellulose		polyA RNA	paired-end	Illumina novaseq 6000	Column name in All_counts_in_same_file.csv: ST_HET_105st	All_counts_in_same_file.csv		105st-1_S8_R1_001.fastq.gz	105st-1_S8_R2_001.fastq.gz
Sample 14	HET_ST_116_biorep1	RNA-seq	Mus Musculus	STRIATUM			HD	Methylcellulose		polyA RNA	paired-end	Illumina novaseq 6000	Column name in All_counts_in_same_file.csv: ST_HET_116st	All_counts_in_same_file.csv		116st-1_S17_R1_001.fastq.gz	116st-1_S17_R2_001.fastq.gz
Sample 15	HET_ST_117_biorep1	RNA-seq	Mus Musculus	STRIATUM			HD	Methylcellulose		polyA RNA	paired-end	Illumina novaseq 6000	Column name in All_counts_in_same_file.csv: ST_HET_117st	All_counts_in_same_file.csv		117st-1_S18_R1_001.fastq.gz	117st-1_S18_R2_001.fastq.gz
Sample 16	HET_ST_12_biorep2	RNA-seq	Mus Musculus	STRIATUM			HD	Methylcellulose		polyA RNA	paired-end	Illumina novaseq 6000	Column name in All_counts_in_same_file.csv: ST_HET_12st	All_counts_in_same_file.csv		12st-2_S14_R1_001.fastq.gz	12st-2_S14_R2_001.fastq.gz
Sample 17	HET_ST_19_biorep2	RNA-seq	Mus Musculus	STRIATUM			HD	Methylcellulose		polyA RNA	paired-end	Illumina novaseq 6000	Column name in All_counts_in_same_file.csv: ST_HET_19st	All_counts_in_same_file.csv		19st-2_S15_R1_001.fastq.gz	19st-2_S15_R2_001.fastq.gz
Sample 18	HET_ST_105_biorep2	RNA-seq	Mus Musculus	STRIATUM			HD	Methylcellulose		polyA RNA	paired-end	Illumina novaseq 6000	Column name in All_counts_in_same_file.csv: ST_HET_105st	All_counts_in_same_file.csv		105st-2_S16_R1_001.fastq.gz	105st-2_S16_R2_001.fastq.gz
Sample 19	HET_ST_116_biorep2	RNA-seq	Mus Musculus	STRIATUM			HD	Methylcellulose		polyA RNA	paired-end	Illumina novaseq 6000	Column name in All_counts_in_same_file.csv: ST_HET_116st	All_counts_in_same_file.csv		116st-2_S24_R1_001.fastq.gz	116st-2_S24_R2_001.fastq.gz
Sample 20	HET_ST_117_biorep2	RNA-seq	Mus Musculus	STRIATUM			HD	Methylcellulose		polyA RNA	paired-end	Illumina novaseq 6000	Column name in All_counts_in_same_file.csv: ST_HET_117st	All_counts_in_same_file.csv		117st-2_S25_R1_001.fastq.gz	117st-2_S25_R2_001.fastq.gz
Sample 21	HET+T0_ST_10_biorep1	RNA-seq	Mus Musculus	STRIATUM			HD	T0901317		polyA RNA	paired-end	Illumina novaseq 6000	Column name in All_counts_in_same_file.csv: ST_HET-T0_10st	All_counts_in_same_file.csv		10st-1_S19_R1_001.fastq.gz	10st-1_S19_R2_001.fastq.gz
Sample 22	HET+T0_ST_11_biorep1	RNA-seq	Mus Musculus	STRIATUM			HD	T0901317		polyA RNA	paired-end	Illumina novaseq 6000	Column name in All_counts_in_same_file.csv: ST_HET-T0_11st	All_counts_in_same_file.csv		11st-1_S20_R1_001.fastq.gz	11st-1_S20_R2_001.fastq.gz
Sample 23	HET+T0_ST_24_biorep1	RNA-seq	Mus Musculus	STRIATUM			HD	T0901317		polyA RNA	paired-end	Illumina novaseq 6000	Column name in All_counts_in_same_file.csv: ST_HET-T0_24st	All_counts_in_same_file.csv		24st-1_S21_R1_001.fastq.gz	24st-1_S21_R2_001.fastq.gz
Sample 24	HET+T0_ST_104_biorep1	RNA-seq	Mus Musculus	STRIATUM			HD	T0901317		polyA RNA	paired-end	Illumina novaseq 6000	Column name in All_counts_in_same_file.csv: ST_HET-T0_104st	All_counts_in_same_file.csv		104st-1_S22_R1_001.fastq.gz	104st-1_S22_R2_001.fastq.gz
Sample 25	HET+T0_ST_120_biorep1	RNA-seq	Mus Musculus	STRIATUM			HD	T0901317		polyA RNA	paired-end	Illumina novaseq 6000	Column name in All_counts_in_same_file.csv: ST_HET-T0_120st	All_counts_in_same_file.csv		120st-1_S23_R1_001.fastq.gz	120st-1_S23_R2_001.fastq.gz
Sample 26	HET+T0_ST_10_biorep2	RNA-seq	Mus Musculus	STRIATUM			HD	T0901317		polyA RNA	paired-end	Illumina novaseq 6000	Column name in All_counts_in_same_file.csv: ST_HET-T0_10st	All_counts_in_same_file.csv		10st-2_S26_R1_001.fastq.gz	10st-2_S26_R2_001.fastq.gz
Sample 27	HET+T0_ST_11_biorep2	RNA-seq	Mus Musculus	STRIATUM			HD	T0901317		polyA RNA	paired-end	Illumina novaseq 6000	Column name in All_counts_in_same_file.csv: ST_HET-T0_11st	All_counts_in_same_file.csv		11st-2_S27_R1_001.fastq.gz	11st-2_S27_R2_001.fastq.gz
Sample 28	HET+T0_ST_24_biorep2	RNA-seq	Mus Musculus	STRIATUM			HD	T0901317		polyA RNA	paired-end	Illumina novaseq 6000	Column name in All_counts_in_same_file.csv: ST_HET-T0_24st	All_counts_in_same_file.csv		24st-2_S28_R1_001.fastq.gz	24st-2_S28_R2_001.fastq.gz
Sample 29	HET+T0_ST_104_biorep2	RNA-seq	Mus Musculus	STRIATUM			HD	T0901317		polyA RNA	paired-end	Illumina novaseq 6000	Column name in All_counts_in_same_file.csv: ST_HET-T0_104st	All_counts_in_same_file.csv		104st-2_S29_R1_001.fastq.gz	104st-2_S29_R2_001.fastq.gz
Sample 30	HET+T0_ST_120_biorep2	RNA-seq	Mus Musculus	STRIATUM			HD	T0901317		polyA RNA	paired-end	Illumina novaseq 6000	Column name in All_counts_in_same_file.csv: ST_HET-T0_120st	All_counts_in_same_file.csv		120st-2_S30_R1_001.fastq.gz	120st-2_S30_R2_001.fastq.gz
Sample 31	WT_HP_13_biorep1	RNA-seq	Mus Musculus	HIPPOCAMPUS			WT	Methylcellulose		polyA RNA	paired-end	Illumina novaseq 6000	Column name in All_counts_in_same_file.csv: HP_WT_13hp	All_counts_in_same_file.csv		13hp-1_S31_R1_001.fastq.gz	13hp-1_S31_R2_001.fastq.gz
Sample 32	WT_HP_14_biorep1	RNA-seq	Mus Musculus	HIPPOCAMPUS			WT	Methylcellulose		polyA RNA	paired-end	Illumina novaseq 6000	Column name in All_counts_in_same_file.csv: HP_WT_14hp	All_counts_in_same_file.csv		14hp-1_S32_R1_001.fastq.gz	14hp-1_S32_R2_001.fastq.gz
Sample 33	WT_HP_17_biorep1	RNA-seq	Mus Musculus	HIPPOCAMPUS			WT	Methylcellulose		polyA RNA	paired-end	Illumina novaseq 6000	Column name in All_counts_in_same_file.csv: HP_WT_17hp	All_counts_in_same_file.csv		17hp-1_S33_R1_001.fastq.gz	17hp-1_S33_R2_001.fastq.gz
Sample 34	WT_HP_22_biorep1	RNA-seq	Mus Musculus	HIPPOCAMPUS			WT	Methylcellulose		polyA RNA	paired-end	Illumina novaseq 6000	Column name in All_counts_in_same_file.csv: HP_WT_22hp	All_counts_in_same_file.csv		22hp-1_S34_R1_001.fastq.gz	22hp-1_S34_R2_001.fastq.gz
Sample 35	WT_HP_23_biorep1	RNA-seq	Mus Musculus	HIPPOCAMPUS			WT	Methylcellulose		polyA RNA	paired-end	Illumina novaseq 6000	Column name in All_counts_in_same_file.csv: HP_WT_23hp	All_counts_in_same_file.csv		23hp-1_S35_R1_001.fastq.gz	23hp-1_S35_R2_001.fastq.gz
Sample 36	WT_HP_13_biorep2	RNA-seq	Mus Musculus	HIPPOCAMPUS			WT	Methylcellulose		polyA RNA	paired-end	Illumina novaseq 6000	Column name in All_counts_in_same_file.csv: HP_WT_13hp	All_counts_in_same_file.csv		13hp-2_S39_R1_001.fastq.gz	13hp-2_S39_R2_001.fastq.gz
Sample 37	WT_HP_14_biorep2	RNA-seq	Mus Musculus	HIPPOCAMPUS			WT	Methylcellulose		polyA RNA	paired-end	Illumina novaseq 6000	Column name in All_counts_in_same_file.csv: HP_WT_14hp	All_counts_in_same_file.csv		14hp-2_S40_R1_001.fastq.gz	14hp-2_S40_R2_001.fastq.gz
Sample 38	WT_HP_17_biorep2	RNA-seq	Mus Musculus	HIPPOCAMPUS			WT	Methylcellulose		polyA RNA	paired-end	Illumina novaseq 6000	Column name in All_counts_in_same_file.csv: HP_WT_17hp	All_counts_in_same_file.csv		17hp-2_S41_R1_001.fastq.gz	17hp-2_S41_R2_001.fastq.gz
Sample 39	WT_HP_22_biorep2	RNA-seq	Mus Musculus	HIPPOCAMPUS			WT	Methylcellulose		polyA RNA	paired-end	Illumina novaseq 6000	Column name in All_counts_in_same_file.csv: HP_WT_22hp	All_counts_in_same_file.csv		22hp-2_S42_R1_001.fastq.gz	22hp-2_S42_R2_001.fastq.gz
Sample 40	WT_HP_23_biorep2	RNA-seq	Mus Musculus	HIPPOCAMPUS			WT	Methylcellulose		polyA RNA	paired-end	Illumina novaseq 6000	Column name in All_counts_in_same_file.csv: HP_WT_23hp	All_counts_in_same_file.csv		23hp-2_S43_R1_001.fastq.gz	23hp-2_S43_R2_001.fastq.gz
Sample 41	HET_HP_12_biorep1	RNA-seq	Mus Musculus	HIPPOCAMPUS			HD	Methylcellulose		polyA RNA	paired-end	Illumina novaseq 6000	Column name in All_counts_in_same_file.csv: HP_HET_12hp	All_counts_in_same_file.csv		12hp-1_S36_R1_001.fastq.gz	12hp-1_S36_R2_001.fastq.gz
Sample 42	HET_HP_19_biorep1	RNA-seq	Mus Musculus	HIPPOCAMPUS			HD	Methylcellulose		polyA RNA	paired-end	Illumina novaseq 6000	Column name in All_counts_in_same_file.csv: HP_HET_19hp	All_counts_in_same_file.csv		19hp-1_S37_R1_001.fastq.gz	19hp-1_S37_R2_001.fastq.gz
Sample 43	HET_HP_105_biorep1	RNA-seq	Mus Musculus	HIPPOCAMPUS			HD	Methylcellulose		polyA RNA	paired-end	Illumina novaseq 6000	Column name in All_counts_in_same_file.csv: HP_HET_105hp	All_counts_in_same_file.csv		105hp-1_S38_R1_001.fastq.gz	105hp-1_S38_R2_001.fastq.gz
Sample 44	HET_HP_116_biorep1	RNA-seq	Mus Musculus	HIPPOCAMPUS			HD	Methylcellulose		polyA RNA	paired-end	Illumina novaseq 6000	Column name in All_counts_in_same_file.csv: HP_HET_116hp	All_counts_in_same_file.csv		116hp-1_S47_R1_001.fastq.gz	116hp-1_S47_R2_001.fastq.gz
Sample 45	HET_HP_117_biorep1	RNA-seq	Mus Musculus	HIPPOCAMPUS			HD	Methylcellulose		polyA RNA	paired-end	Illumina novaseq 6000	Column name in All_counts_in_same_file.csv: HP_HET_117hp	All_counts_in_same_file.csv		117hp-1_S48_R1_001.fastq.gz	117hp-1_S48_R2_001.fastq.gz
Sample 46	HET_HP_12_biorep2	RNA-seq	Mus Musculus	HIPPOCAMPUS			HD	Methylcellulose		polyA RNA	paired-end	Illumina novaseq 6000	Column name in All_counts_in_same_file.csv: HP_HET_12hp	All_counts_in_same_file.csv		12hp-2_S44_R1_001.fastq.gz	12hp-2_S44_R2_001.fastq.gz
Sample 47	HET_HP_19_biorep2	RNA-seq	Mus Musculus	HIPPOCAMPUS			HD	Methylcellulose		polyA RNA	paired-end	Illumina novaseq 6000	Column name in All_counts_in_same_file.csv: HP_HET_19hp	All_counts_in_same_file.csv		19hp-2_S45_R1_001.fastq.gz	19hp-2_S45_R2_001.fastq.gz
Sample 48	HET_HP_105_biorep2	RNA-seq	Mus Musculus	HIPPOCAMPUS			HD	Methylcellulose		polyA RNA	paired-end	Illumina novaseq 6000	Column name in All_counts_in_same_file.csv: HP_HET_105hp	All_counts_in_same_file.csv		105hp-2_S46_R1_001.fastq.gz	105hp-2_S46_R2_001.fastq.gz
Sample 49	HET_HP_116_biorep2	RNA-seq	Mus Musculus	HIPPOCAMPUS			HD	Methylcellulose		polyA RNA	paired-end	Illumina novaseq 6000	Column name in All_counts_in_same_file.csv: HP_HET_116hp	All_counts_in_same_file.csv		116hp-2_S54_R1_001.fastq.gz	116hp-2_S54_R2_001.fastq.gz
Sample 50	HET_HP_117_biorep2	RNA-seq	Mus Musculus	HIPPOCAMPUS			HD	Methylcellulose		polyA RNA	paired-end	Illumina novaseq 6000	Column name in All_counts_in_same_file.csv: HP_HET_117hp	All_counts_in_same_file.csv		117hp-2_S55_R1_001.fastq.gz	117hp-2_S55_R2_001.fastq.gz
Sample 51	HET+T0_HP_10_biorep1	RNA-seq	Mus Musculus	HIPPOCAMPUS			HD	T0901317		polyA RNA	paired-end	Illumina novaseq 6000	Column name in All_counts_in_same_file.csv: HP_HET-T0_10hp	All_counts_in_same_file.csv		10hp-1_S49_R1_001.fastq.gz	10hp-1_S49_R2_001.fastq.gz
Sample 52	HET+T0_HP_11_biorep1	RNA-seq	Mus Musculus	HIPPOCAMPUS			HD	T0901317		polyA RNA	paired-end	Illumina novaseq 6000	Column name in All_counts_in_same_file.csv: HP_HET-T0_11hp	All_counts_in_same_file.csv		11hp-1_S50_R1_001.fastq.gz	11hp-1_S50_R2_001.fastq.gz
Sample 53	HET+T0_HP_24_biorep1	RNA-seq	Mus Musculus	HIPPOCAMPUS			HD	T0901317		polyA RNA	paired-end	Illumina novaseq 6000	Column name in All_counts_in_same_file.csv: HP_HET-T0_24hp	All_counts_in_same_file.csv		24hp-1_S51_R1_001.fastq.gz	24hp-1_S51_R2_001.fastq.gz
Sample 54	HET+T0_HP_104_biorep1	RNA-seq	Mus Musculus	HIPPOCAMPUS			HD	T0901317		polyA RNA	paired-end	Illumina novaseq 6000	Column name in All_counts_in_same_file.csv: HP_HET-T0_104hp	All_counts_in_same_file.csv		104hp-1_S52_R1_001.fastq.gz	104hp-1_S52_R2_001.fastq.gz
Sample 55	HET+T0_HP_120_biorep1	RNA-seq	Mus Musculus	HIPPOCAMPUS			HD	T0901317		polyA RNA	paired-end	Illumina novaseq 6000	Column name in All_counts_in_same_file.csv: HP_HET-T0_120hp	All_counts_in_same_file.csv		120hp-1_S53_R1_001.fastq.gz	120hp-1_S53_R2_001.fastq.gz
Sample 56	HET+T0_HP_10_biorep2	RNA-seq	Mus Musculus	HIPPOCAMPUS			HD	T0901317		polyA RNA	paired-end	Illumina novaseq 6000	Column name in All_counts_in_same_file.csv: HP_HET-T0_10hp	All_counts_in_same_file.csv		10hp-2_S56_R1_001.fastq.gz	10hp-2_S56_R2_001.fastq.gz
Sample 57	HET+T0_HP_11_biorep2	RNA-seq	Mus Musculus	HIPPOCAMPUS			HD	T0901317		polyA RNA	paired-end	Illumina novaseq 6000	Column name in All_counts_in_same_file.csv: HP_HET-T0_11hp	All_counts_in_same_file.csv		11hp-2_S57_R1_001.fastq.gz	11hp-2_S57_R2_001.fastq.gz
Sample 58	HET+T0_HP_24_biorep2	RNA-seq	Mus Musculus	HIPPOCAMPUS			HD	T0901317		polyA RNA	paired-end	Illumina novaseq 6000	Column name in All_counts_in_same_file.csv: HP_HET-T0_24hp	All_counts_in_same_file.csv		24hp-2_S58_R1_001.fastq.gz	24hp-2_S58_R2_001.fastq.gz
Sample 59	HET+T0_HP_104_biorep2	RNA-seq	Mus Musculus	HIPPOCAMPUS			HD	T0901317		polyA RNA	paired-end	Illumina novaseq 6000	Column name in All_counts_in_same_file.csv: HP_HET-T0_104hp	All_counts_in_same_file.csv		104hp-2_S59_R1_001.fastq.gz	104hp-2_S59_R2_001.fastq.gz
Sample 60	HET+T0_HP_120_biorep2	RNA-seq	Mus Musculus	HIPPOCAMPUS			HD	T0901317		polyA RNA	paired-end	Illumina novaseq 6000	Column name in All_counts_in_same_file.csv: HP_HET-T0_120hp	All_counts_in_same_file.csv		120hp-2_S60_R1_001.fastq.gz	120hp-2_S60_R2_001.fastq.gz
PROTOCOLS
# Information provided in this section will appear in each GEO Sample record (GSMxxxxxxx).
# PROTOCOLS information must be listed in column B. Add more rows, if needed. Do not place text in column C or beyond.
growth protocol
treatment protocol
*extract protocol	Mice were deeply anesthetized by intraperitoneal injection of Euthasol® Vet (150 mg/kg, Dechra) and intracardiac perfusion was performed on mice with fresh PBS. Striatum and hippocampus were dissected on ice, rapidly frozen in dry ice and stored at -80°C until RNA extraction. Brain samples or culture cells (neurons or astrocytes) were homogenized in QIAzolTM Lysis Reagent (Qiagen) and RNA extract…
*library construction protocol	RNAseq libraries were generated from 500ng of total RNA using Stranded mRNA Prep, Ligation(Illumina, San Diego) according to manufacturer's instructions. Briefly following purification with poly-Toligo
*data processing step	Raw sequencing reads were pre-processed in order to discard both adapter sequences and low-quality reads using cutadapt.
data processing step	The filtered reads were then mapped to the mouse reference genome mm10 (UCSC 2013 release) by using STAR
data processing step	Read distribution was calculated by using the featureCounts tool
data processing step
data processing step
*genome build/assembly	mm10
*processed data files format and content	Tab-delimited file including counts for each sample, with collapsed biological replicates
processed data files format and content
PAIRED-END EXPERIMENTS
# If "paired-end" experiments are included, list the FASTQ files for each paired-end run in a row. Each row will become one sequencing run on a GEO Sample record (GSMxxxxxxx).
# Single-cell or Spatial transcriptomics data: If applicable, list index files (I1, I2, etc.) in "file name 3", "file name 4" columns.
# All raw files listed in PAIRED-END EXPERIMENTS must also be listed in the SAMPLES section above.
file name 1	file name 2	file name 3	file name 4
13st-1_S1_R1_001.fastq.gz	13st-1_S1_R2_001.fastq.gz
14st-1_S2_R1_001.fastq.gz	14st-1_S2_R2_001.fastq.gz
16st-1_S3_R1_001.fastq.gz	16st-1_S3_R2_001.fastq.gz
17st-1_S4_R1_001.fastq.gz	17st-1_S4_R2_001.fastq.gz
22st-1_S5_R1_001.fastq.gz	22st-1_S5_R2_001.fastq.gz
13st-2_S9_R1_001.fastq.gz	13st-2_S9_R2_001.fastq.gz
14st-2_S10_R1_001.fastq.gz	14st-2_S10_R2_001.fastq.gz
16st-2_S11_R1_001.fastq.gz	16st-2_S11_R2_001.fastq.gz
17st-2_S12_R1_001.fastq.gz	17st-2_S12_R2_001.fastq.gz
22st-2_S13_R1_001.fastq.gz	22st-2_S13_R2_001.fastq.gz
12st-1_S6_R1_001.fastq.gz	12st-1_S6_R2_001.fastq.gz
19st-1_S7_R1_001.fastq.gz	19st-1_S7_R2_001.fastq.gz
105st-1_S8_R1_001.fastq.gz	105st-1_S8_R2_001.fastq.gz
116st-1_S17_R1_001.fastq.gz	116st-1_S17_R2_001.fastq.gz
117st-1_S18_R1_001.fastq.gz	117st-1_S18_R2_001.fastq.gz
12st-2_S14_R1_001.fastq.gz	12st-2_S14_R2_001.fastq.gz
19st-2_S15_R1_001.fastq.gz	19st-2_S15_R2_001.fastq.gz
105st-2_S16_R1_001.fastq.gz	105st-2_S16_R2_001.fastq.gz
116st-2_S24_R1_001.fastq.gz	116st-2_S24_R2_001.fastq.gz
117st-2_S25_R1_001.fastq.gz	117st-2_S25_R2_001.fastq.gz
10st-1_S19_R1_001.fastq.gz	10st-1_S19_R2_001.fastq.gz
11st-1_S20_R1_001.fastq.gz	11st-1_S20_R2_001.fastq.gz
24st-1_S21_R1_001.fastq.gz	24st-1_S21_R2_001.fastq.gz
104st-1_S22_R1_001.fastq.gz	104st-1_S22_R2_001.fastq.gz
120st-1_S23_R1_001.fastq.gz	120st-1_S23_R2_001.fastq.gz
10st-2_S26_R1_001.fastq.gz	10st-2_S26_R2_001.fastq.gz
11st-2_S27_R1_001.fastq.gz	11st-2_S27_R2_001.fastq.gz
24st-2_S28_R1_001.fastq.gz	24st-2_S28_R2_001.fastq.gz
104st-2_S29_R1_001.fastq.gz	104st-2_S29_R2_001.fastq.gz
120st-2_S30_R1_001.fastq.gz	120st-2_S30_R2_001.fastq.gz
13hp-1_S31_R1_001.fastq.gz	13hp-1_S31_R2_001.fastq.gz
14hp-1_S32_R1_001.fastq.gz	14hp-1_S32_R2_001.fastq.gz
17hp-1_S33_R1_001.fastq.gz	17hp-1_S33_R2_001.fastq.gz
22hp-1_S34_R1_001.fastq.gz	22hp-1_S34_R2_001.fastq.gz
23hp-1_S35_R1_001.fastq.gz	23hp-1_S35_R2_001.fastq.gz
13hp-2_S39_R1_001.fastq.gz	13hp-2_S39_R2_001.fastq.gz
14hp-2_S40_R1_001.fastq.gz	14hp-2_S40_R2_001.fastq.gz
17hp-2_S41_R1_001.fastq.gz	17hp-2_S41_R2_001.fastq.gz
22hp-2_S42_R1_001.fastq.gz	22hp-2_S42_R2_001.fastq.gz
23hp-2_S43_R1_001.fastq.gz	23hp-2_S43_R2_001.fastq.gz
12hp-1_S36_R1_001.fastq.gz	12hp-1_S36_R2_001.fastq.gz
19hp-1_S37_R1_001.fastq.gz	19hp-1_S37_R2_001.fastq.gz
105hp-1_S38_R1_001.fastq.gz	105hp-1_S38_R2_001.fastq.gz
116hp-1_S47_R1_001.fastq.gz	116hp-1_S47_R2_001.fastq.gz
117hp-1_S48_R1_001.fastq.gz	117hp-1_S48_R2_001.fastq.gz
12hp-2_S44_R1_001.fastq.gz	12hp-2_S44_R2_001.fastq.gz
19hp-2_S45_R1_001.fastq.gz	19hp-2_S45_R2_001.fastq.gz
105hp-2_S46_R1_001.fastq.gz	105hp-2_S46_R2_001.fastq.gz
116hp-2_S54_R1_001.fastq.gz	116hp-2_S54_R2_001.fastq.gz
117hp-2_S55_R1_001.fastq.gz	117hp-2_S55_R2_001.fastq.gz
10hp-1_S49_R1_001.fastq.gz	10hp-1_S49_R2_001.fastq.gz
11hp-1_S50_R1_001.fastq.gz	11hp-1_S50_R2_001.fastq.gz
24hp-1_S51_R1_001.fastq.gz	24hp-1_S51_R2_001.fastq.gz
104hp-1_S52_R1_001.fastq.gz	104hp-1_S52_R2_001.fastq.gz
120hp-1_S53_R1_001.fastq.gz	120hp-1_S53_R2_001.fastq.gz
10hp-2_S56_R1_001.fastq.gz	10hp-2_S56_R2_001.fastq.gz
11hp-2_S57_R1_001.fastq.gz	11hp-2_S57_R2_001.fastq.gz
24hp-2_S58_R1_001.fastq.gz	24hp-2_S58_R2_001.fastq.gz
104hp-2_S59_R1_001.fastq.gz	104hp-2_S59_R2_001.fastq.gz
120hp-2_S60_R1_001.fastq.gz	120hp-2_S60_R2_001.fastq.gz

## Sheet: Instructions
This file contains the following worksheets: Instructions for high-throughput sequence (HTS) submissions to NCBI GEO Metadata template (Use this tab to provide study, sample and protocol information. Please completely annotate the template. Failure to do so may result in significant delays in processing.) MD5 Checksums for the raw data files and processed data files referenced in Metadata Templat…
This file was last updated by GEO on Dec 17, 2024.
Full online instructions and pointers to more examples are at: https://www.ncbi.nlm.nih.gov/geo/info/seq.html
For questions or concerns, please email us at geo@ncbi.nlm.nih.gov
Quick Instructions	Links
Step 1: Check that GEO accepts your data type.	Categories of data we do and do not accept
Step 2: Gather raw data files.	Raw data file instructions
Step 3: Gather processed data files.	Processed data file instructions
Step 4: Fill in Metadata tab (one seq type per template). Please review "Before completing your Metadata file" below.	First tab, at the foot of this page
Step 5: Fill in MD5 Checksums sheet for any raw data files and processed data files referenced in Metadata tab.
Step 6: Create a single folder on your computer that contains all raw and processed data files for your experiment. If you have multiple experiments (e.g., ChIP-seq, RNA-seq), please use one folder per experiment.	Create folder
Step 7: FTP the data folder(s) to GEO.	FTP instructions
Step 8: Upload your metadata file(s) on the Submit Metadata page after the FTP transfer is complete; Submissions will not get processed without an uploaded metadata file.	Submit Metadata
Step 9: Your submission is placed into the processing queue and reviewed within 5 business days; expect to receive an email from GEO curators with questions about your submission or the GEO accession numbers.	When will my data receive GEO accession numbers?
* Updating GEO records (that have been processed and approved) can be labor-intensive and time-consuming, so please carefully prepare your submission before you transfer your files to the GEO FTP server. If you must update your GEO records, please see our instructions for updates available with the link at right.	Updating your GEO records
Common FAQs (for more FAQs, see https://www.ncbi.nlm.nih.gov/geo/info/seq.html#faq)
Human data warning DO NOT SUBMIT TO GEO if there are patient privacy concerns regarding making data fully public. Rather, submit to NCBI's dbGaP (https://www.ncbi.nlm.nih.gov/gap/) database, which has controlled access mechanisms and is an appropriate resource for hosting sensitive patient data. It is the submitter's responsibility to ensure that the submitted information does not compromise part…
Raw data already submitted to SRA It is not necessary for you to submit raw data directly to SRA, but if you did and you want corresponding GEO entries, please use the metadata template specific for this case: https://www.ncbi.nlm.nih.gov/geo/info/seq.html#sra NOTE: Do not upload the raw files to GEO and do not list the raw file names in the Metadata template.

## Sheet: MD5 Checksums
# We strongly recommend that submitters provide MD5 checksums for their raw data files. The checksums are used to verify file integrity. Checksums can be calculated using the following methods:
# Unix: md5sum <file>
# OS X: md5 <file>
# Windows: Windows Command Processor (cmd): certutil -hashfile <file> MD5
RAW FILES					PROCESSED DATA FILES
file name	file checksum				file name	file checksum
104hp-1_S52_R1_001.fastq.gz	cc9af045de816012ca4f72ce0f117895				All_counts_in_same_file.csv	dcb621e192b0b496a1720949696a4ae3
104hp-1_S52_R2_001.fastq.gz	829f44aa52d8f7ef3853146d5e60b960
104hp-2_S59_R1_001.fastq.gz	eb375726ad314bd75883d29f657ace21
104hp-2_S59_R2_001.fastq.gz	f1a1ab76e1e6761317ddabdaf115e0d6
104st-1_S22_R1_001.fastq.gz	8ffea27d818e313981382122035bab8d
104st-1_S22_R2_001.fastq.gz	7719380ac98990674bf835ad885225ed
104st-2_S29_R1_001.fastq.gz	50e1d70babf94c779fb445c6e1362d98
104st-2_S29_R2_001.fastq.gz	4e7503c96516e56b757b630bec7fcd57
105hp-1_S38_R1_001.fastq.gz	87cbfe26040a7458b610793ebf6dfb86
105hp-1_S38_R2_001.fastq.gz	b5df3f7a50cc49547f1cfceab5c6d7b4
105hp-2_S46_R1_001.fastq.gz	e06fa704185f18dd815fe9204780049d
105hp-2_S46_R2_001.fastq.gz	84a3cbe654405df05e339c0dce375a3d
105st-1_S8_R1_001.fastq.gz	65bcb41b31bd143e9ab7ec63ab304c91
105st-1_S8_R2_001.fastq.gz	846a579765bb25651cd42dd41f644eca
105st-2_S16_R1_001.fastq.gz	f7ceb19c32361329327a1201bd8664e5
105st-2_S16_R2_001.fastq.gz	24ef93c45547c64172c0063f072047c7
10hp-1_S49_R1_001.fastq.gz	1b567634d9ef56c08b9322c5f8550775
10hp-1_S49_R2_001.fastq.gz	1f928dcd8774f6fae8bcd9db9fae90df
10hp-2_S56_R1_001.fastq.gz	680a132b8fef63a89e16a4ffcfe4410d
10hp-2_S56_R2_001.fastq.gz	4f9c0e962101798dd7c57d7d7e64c00b
10st-1_S19_R1_001.fastq.gz	84f92701a7578ab3bbdc2ae07c82f268
10st-1_S19_R2_001.fastq.gz	4f6939a3d6d79dd967960667c6d06aa9
10st-2_S26_R1_001.fastq.gz	0a893297393a52cf3c2c2ebc7c69bde1
10st-2_S26_R2_001.fastq.gz	d962e1028c6d9d471fdbe03b8c93d369
116hp-1_S47_R1_001.fastq.gz	b49cfe7f4b6180ea92065120d8816234
116hp-1_S47_R2_001.fastq.gz	7254655fa4d59b8922fae3f3b9d9ef4a
116hp-2_S54_R1_001.fastq.gz	feab50ed5379b1e04d3b5d2f116dec6f
116hp-2_S54_R2_001.fastq.gz	54edd34344eeaae8cc4c809fc6c8c21f
116st-1_S17_R1_001.fastq.gz	b85bd2c5a473211f82648e64b033a233
116st-1_S17_R2_001.fastq.gz	3719a9fa9fd84ce731077a8036f153ed
116st-2_S24_R1_001.fastq.gz	03d835addd964215d5d3622e1ac7eeeb
116st-2_S24_R2_001.fastq.gz	87bdbde001c930676330a8180cdb4cc6
117hp-1_S48_R1_001.fastq.gz	2ecf557c684256e760d3b3e22e5c5402
117hp-1_S48_R2_001.fastq.gz	9cfb085c2710b1da47b34cc23b0a2edc
117hp-2_S55_R1_001.fastq.gz	aec6ce4a0360163e3be23923905936ab
117hp-2_S55_R2_001.fastq.gz	c4ba108092845ae1a12faffd9c9056f9
117st-1_S18_R1_001.fastq.gz	27b5dad116412892fa51abb8d3e53e7f
117st-1_S18_R2_001.fastq.gz	bccceed2279272337212005f3364cc05
117st-2_S25_R1_001.fastq.gz	ac5881ca25f01c37b1e5454bf1dae46e
117st-2_S25_R2_001.fastq.gz	e31ce86ada55f5c6a91a5645a7ef320c
11hp-1_S50_R1_001.fastq.gz	5eb348520cab9623593cb9d7b8831088
11hp-1_S50_R2_001.fastq.gz	0ffd79de1686b4ecb12fcbd133e7bce9
11hp-2_S57_R1_001.fastq.gz	d059be100ad63dd4a223b11bc58a6113
11hp-2_S57_R2_001.fastq.gz	23b0d0672f440462881fbdd4e0196a49
11st-1_S20_R1_001.fastq.gz	df1780039ec66db6b243fd2cb2819300
11st-1_S20_R2_001.fastq.gz	a572d15dda34b50249fffb986470bb06
11st-2_S27_R1_001.fastq.gz	22f555429403c5e95c87a0a170355dc6
11st-2_S27_R2_001.fastq.gz	537c895163ec08b7afe7c82bdf625817
120hp-1_S53_R1_001.fastq.gz	2e9495e90b9fb88b0b49e707c4e38925
120hp-1_S53_R2_001.fastq.gz	dfad7893d1f0f418247ca64a18682e5c
120hp-2_S60_R1_001.fastq.gz	172a10dd59ad8ec5d76b6fc1876bd30f
120hp-2_S60_R2_001.fastq.gz	61b2de6001d8409d40d039f768d3f180
120st-1_S23_R1_001.fastq.gz	490c6ec97a7c4432c115b53c1cc6147c
120st-1_S23_R2_001.fastq.gz	1d7d5c9f73918fd89eb53b6e1e0ebfa1
120st-2_S30_R1_001.fastq.gz	023ff664c98e7f2ae98f22131bf99485
120st-2_S30_R2_001.fastq.gz	5d11baa1e17fcb20279eb5708ae59786
12hp-1_S36_R1_001.fastq.gz	0fb0d10543849d3ef08eae95b50efee4
12hp-1_S36_R2_001.fastq.gz	ba58ad2a67b4b11950c85075abd14260
12hp-2_S44_R1_001.fastq.gz	3a747dfe8edc25d17403df0d0a3aa14e
12hp-2_S44_R2_001.fastq.gz	1f963ea09ca5dd7e33dfe9a20b449f6b
12st-1_S6_R1_001.fastq.gz	4771a4bf3219ada5e8f4296c280d987f
12st-1_S6_R2_001.fastq.gz	99c2e9a9d14ff1eda1d908e972670d3f
12st-2_S14_R1_001.fastq.gz	9ede0c9022ac6f54a90da42b03691f5f
12st-2_S14_R2_001.fastq.gz	b6cf6182495529874d0ea676fe478eaa
13hp-1_S31_R1_001.fastq.gz	83ba93d98a72836487bd53e418c2d1f7
13hp-1_S31_R2_001.fastq.gz	dcb822e2a2a22d057b3b9bf2830db213
13hp-2_S39_R1_001.fastq.gz	4289e682b2a679f1ce26f841c0030aed
13hp-2_S39_R2_001.fastq.gz	ae2fa63d8a2fa8c55d812ed9192a73fb
13st-1_S1_R1_001.fastq.gz	d36f543d9d7aa3e97f9e0f7923d3b445
13st-1_S1_R2_001.fastq.gz	0b0f12a1ec00f9484f64de268c15e110
13st-2_S9_R1_001.fastq.gz	bd9a4f0eceb2c416a49d427f2fc8c7ea
13st-2_S9_R2_001.fastq.gz	5e124a6c1ac03c2c41209c2973a51109
14hp-1_S32_R1_001.fastq.gz	e24a8a9eeaedad7de3593bb962c5c7f9
14hp-1_S32_R2_001.fastq.gz	320381a70d0493d8c7609f80b45af227
14hp-2_S40_R1_001.fastq.gz	990b47afcb8ff6614d493bc6b9726322
14hp-2_S40_R2_001.fastq.gz	b31d82e6ca9e6a99ac656a4ff0b72bda
14st-1_S2_R1_001.fastq.gz	c5ebafe5b6c9ff77bb698a56ddda4ec4
14st-1_S2_R2_001.fastq.gz	d8a0ed0047f4972ec0b268e4dfdc5775
14st-2_S10_R1_001.fastq.gz	e207ceb5b15e8645ffc67e5bf4e6829f
14st-2_S10_R2_001.fastq.gz	0e3df4f4e0246bcf7c14002f582c5850
16st-1_S3_R1_001.fastq.gz	dbdc8fd0199401ee01e2564915511d77
16st-1_S3_R2_001.fastq.gz	7f1e12fef997cd22dcf570e06abc0df6
16st-2_S11_R1_001.fastq.gz	3294a78a6e982a8e54acd3170a8ef586
16st-2_S11_R2_001.fastq.gz	ce390f126b0326fa45ff9e4412808c5f
17hp-1_S33_R1_001.fastq.gz	2106c48bec11def81e5ae39c1e34a69d
17hp-1_S33_R2_001.fastq.gz	4de0c06f6144dc42d0e7b953e3d7d164
17hp-2_S41_R1_001.fastq.gz	2e1d3f000577deabe81f43558efaafef
17hp-2_S41_R2_001.fastq.gz	539ccac0b9e61b62bf93ec4d36c49d6f
17st-1_S4_R1_001.fastq.gz	b3922bff0bfa6b01994ffbf561e146a9
17st-1_S4_R2_001.fastq.gz	e8dc508773fcbe3680f37a00caf0bf1d
17st-2_S12_R1_001.fastq.gz	f2035955c2a2cdb6e7f7b37952854b79
17st-2_S12_R2_001.fastq.gz	4a082eb94cc5c9745ec58fb64f659b03
19hp-1_S37_R1_001.fastq.gz	00606156eef2ad99100cad46c9baaf62
19hp-1_S37_R2_001.fastq.gz	c3ee598c0b41864d097b12a36777b321
19hp-2_S45_R1_001.fastq.gz	1f49fde737f739e4ef9da96373cb6539
19hp-2_S45_R2_001.fastq.gz	a9fe58124973bf9d8004bd64122a3164
19st-1_S7_R1_001.fastq.gz	a1e44371de8659241a3c3b29a18b2f9b
19st-1_S7_R2_001.fastq.gz	12bf9c94582830b9c2f554b666b7ad07
19st-2_S15_R1_001.fastq.gz	676e183cf97be511cb0b99ce28e08f2e
19st-2_S15_R2_001.fastq.gz	797a18faa1a482ec7b48308218dfd6dd
22hp-1_S34_R1_001.fastq.gz	31a8196b0e71836eaf214c7d01b20ad6
22hp-1_S34_R2_001.fastq.gz	64052ed28a1a081715cc1aad8879d2ea
22hp-2_S42_R1_001.fastq.gz	07cc3690c9f2c903adbd34c73cd7ef90
22hp-2_S42_R2_001.fastq.gz	bc33eca370b7125ad53c8156ed2fbd3b
22st-1_S5_R1_001.fastq.gz	c3bc80ffa94a82508ae39fddbfcce50b
22st-1_S5_R2_001.fastq.gz	18ca67ad457bd62569ae7c7a07b117b3
22st-2_S13_R1_001.fastq.gz	7196a0364a49d1adf4d841f5f5aed91a
22st-2_S13_R2_001.fastq.gz	7d8bbaa104d9c37a18ed7c64f4172305
23hp-1_S35_R1_001.fastq.gz	08648f4489840bfc0a8284414f799d7e
23hp-1_S35_R2_001.fastq.gz	e8cdae099a057e8aa398ca538bbcac1c
23hp-2_S43_R1_001.fastq.gz	4817f802913a05836ba66070728c2577
23hp-2_S43_R2_001.fastq.gz	04b6c007c5df3b4b7bc36823a042a4cc
24hp-1_S51_R1_001.fastq.gz	b155b610fea7e999b2823103d88052a4
24hp-1_S51_R2_001.fastq.gz	9c340b820de91cd0890dd09ce6fe9c62
24hp-2_S58_R1_001.fastq.gz	c10ae3c89518b1825cf2578b32c25dc3
24hp-2_S58_R2_001.fastq.gz	df5d33cbf5001d9fbb5fec298a8e5149
24st-1_S21_R1_001.fastq.gz	5fd8319b987ae0f21325eef9a69a445a
24st-1_S21_R2_001.fastq.gz	29550da27be8b856b3ebe556396e6bcc
24st-2_S28_R1_001.fastq.gz	d24734505e99eb6dab908ac2b3da50b3
24st-2_S28_R2_001.fastq.gz	1a6a085931b09fb8844734c1cd9b076b

## Sheet: Data validation
Instrument model	library strategy
HiSeq X Five	RNA-Seq
HiSeq X Ten	scRNA-seq
Illumina Genome Analyzer	miRNA-Seq
Illumina Genome Analyzer II	ncRNA-Seq
Illumina Genome Analyzer IIx	ChIP-Seq
Illumina HiScanSQ	ATAC-seq
Illumina HiSeq 1000	scATAC-seq
Illumina HiSeq 1500	Bisulfite-Seq
Illumina HiSeq 2000	Bisulfite-Seq (reduced representation)
Illumina HiSeq 2500	Spatial Transcriptomics
Illumina HiSeq 3000	CITE-seq
Illumina HiSeq 4000	CUT&Run
Illumina iSeq 100	CUT&Tag
Illumina MiniSeq	MNase-Seq
Illumina MiSeq	Hi-C
Illumina NextSeq 500	MBD-Seq
Illumina NovaSeq 6000	MRE-Seq
Illumina NovaSeq X	MeDIP-Seq
Illumina NovaSeq X Plus	DNase-Hypersensitivity
NextSeq 1000	Tn-Seq
NextSeq 2000	FAIRE-seq
NextSeq 550	SELEX
BGISEQ-500	RIP-Seq
DNBSEQ-G400	ChIA-PET
DNBSEQ-G400 FAST	BRU-Seq
DNBSEQ-G50	CRISPR Screen
DNBSEQ-T7	Capture-C
MGISEQ-2000RS	ChEC-seq
GridION	ChIRP-seq
MinION	DamID-Seq
PromethION	EM-seq
Ion GeneStudio S5	GRO-Seq
Ion GeneStudio S5 plus	HiChIP
Ion GeneStudio S5 prime	MeRIP-Seq
Ion Torrent Genexus	PRO-Seq
Ion Torrent PGM	RNA methylation
Ion Torrent Proton	Ribo-Seq
Ion Torrent S5	TCR-Seq
Ion Torrent S5 XL	BCR-Seq
PacBio RS	iCLIP
PacBio RS II	smallRNA-Seq
AB 5500 Genetic Analyzer	snRNA-Seq
AB 5500xl Genetic Analyzer	ssRNA-Seq
AB 5500xl-W Genetic Analysis System	RNA-Seq (CAGE)
AB SOLiD 3 Plus System	RNA-Seq (RACE)
AB SOLiD 4 System	16S rRNA-seq
AB SOLiD 4hq System	4C-Seq
AB SOLiD PI System	OTHER
AB SOLiD System
AB SOLiD System 2.0
AB SOLiD System 3.0
Sequel
Sequel II
Sequel IIe
454 GS
454 GS 20
454 GS FLX
454 GS FLX Titanium
454 GS FLX+
454 GS Junior
Complete Genomics
Element AVITI
FASTASeq 300
GenoCare 1600
GenoLab M
GS111
Helicos HeliScope
Onso
Revio
Sentosa SQ301
Tapestri
UG 100
