# Supplementary material for: Liver X Receptor activation protects Huntington’s disease knock-in mice from behavioral and neuropathological impairments
Source: Research Square preprint supplement (doi:10.21203/rs.3.rs-8155849/v1), 2025-12-01
Supplement: Supplementary file 2 [file fdfbb6d498f697f7e0b569a4.xlsx]

## Sheet: Supp.Table_1
Count with PKR from bluk RNAseq data (Figure 3 and Supplementary Figure 2)
		Hippocampus															Striatum
		HET + T0					HET					WT					HET + T0					HET					WT
Gene_name	RPK_Length	RPK_HP_HET-T0_104hp	RPK_HP_HET-T0_10hp	RPK_HP_HET-T0_11hp	RPK_HP_HET-T0_120hp	RPK_HP_HET-T0_24hp	RPK_HP_HET_105hp	RPK_HP_HET_116hp	RPK_HP_HET_117hp	RPK_HP_HET_12hp	RPK_HP_HET_19hp	RPK_HP_WT_13hp	RPK_HP_WT_14hp	RPK_HP_WT_17hp	RPK_HP_WT_22hp	RPK_HP_WT_23hp	RPK_ST_HET-T0_104st	RPK_ST_HET-T0_10st	RPK_ST_HET-T0_11st	RPK_ST_HET-T0_120st	RPK_ST_HET-T0_24st	RPK_ST_HET_105st	RPK_ST_HET_116st	RPK_ST_HET_117st	RPK_ST_HET_12st	RPK_ST_HET_19st	RPK_ST_WT_13st	RPK_ST_WT_14st	RPK_ST_WT_16st	RPK_ST_WT_17st	RPK_ST_WT_22st
Xkr4	1000	273.803	191.249	262.521	236.103	211.888	206.935	155.751	147.221	224.546	138.415	144.194	176.114	283.709	210.237	140.066	185.195	208.586	194.551	166.208	195.102	144.194	248.211	164.832	168.409	260.594	142.818	182.994	158.228	165.107	195.102
Rp1	1000	0.307787	0.307787	0.102596	0.205191	0.307787	0.205191	0.102596	0.205191	0.205191	0	0	0.102596	0.205191	0.307787	0	0.102596	0.71817	0.615574	0.205191	1.12855	0.307787	0.923361	0.615574	1.64153	1.23115	0.307787	0.307787	0.410383	0.615574	0.615574
Sox17	1000	49.3284	38.0952	40.293	53.2357	45.177	39.072	70.8181	51.5263	36.3858	54.9451	50.3053	31.0134	46.8864	55.1893	27.8388	30.0366	25.641	32.2344	24.1758	30.7692	32.7228	37.1184	37.851	38.0952	42.9792	45.177	54.7009	42.0024	40.5372	41.514
Mrpl15	1000	259.224	248.988	269.46	268.984	246.608	231.85	234.468	199.238	235.658	227.327	257.796	263.033	264.461	248.274	233.04	261.842	227.327	275.173	259.7	255.177	240.895	311.831	285.408	293.978	288.741	231.373	247.56	236.134	254.463	275.173
Lypla1	1000	559.392	580.764	635.43	627.209	524.455	548.294	605.836	570.489	568.845	557.337	499.383	530.621	615.701	616.112	491.163	568.023	496.917	754.213	598.438	517.879	571.311	773.12	663.79	773.531	811.344	623.51	505.549	453.35	485.82	644.061
Tcea1	1000	1108.54	988.409	1063.58	1156.3	987.706	911.486	897.085	840.183	935.371	876.712	957.499	925.887	1129.26	1033.37	924.833	1165.44	1061.47	1229.36	1004.92	1106.43	958.904	1236.04	1208.29	1188.62	1311.91	1079.73	1097.3	1146.47	1071.3	1107.48
Rgs20	1000	317.151	373.259	341.823	331.476	316.355	299.244	518.902	421.409	275.368	289.296	330.283	313.172	362.515	358.934	319.936	1285.71	1079.19	1094.71	1004.78	1131.32	824.513	1021.49	1128.13	1028.65	1047.75	1186.63	1372.07	1380.82	1399.12	1087.15
Atp6v1h	1000	2999.49	3019.23	2994.43	3104.76	2986.84	2777.83	3278.85	3121.96	3071.86	2817.31	3006.58	2802.63	3412.96	3313.26	2750.51	3714.57	3188.26	3843.62	3812.75	3576.42	3400.3	4230.26	3717.61	3894.74	4225.71	3231.78	3360.32	3376.52	3104.76	4020.24
Oprk1	1000	7.43573	9.77268	5.52369	4.88634	9.98513	10.6225	43.1273	50.1381	11.0474	7.64818	8.71043	7.22328	5.94859	10.1976	5.94859	349.055	360.102	379.86	340.557	306.352	252.815	274.485	295.305	371.362	289.569	218.823	382.622	374.973	418.313	359.04
Npbwr1	1000	13.0011	33.5861	7.58397	15.4388	32.7736	13.8137	7.58397	6.50054	26.273	17.0639	23.8353	11.3759	21.3976	24.6479	15.1679	16.7931	11.9177	12.1885	31.4193	13.2719	24.377	17.3348	12.1885	20.3142	9.47996	7.31311	13.0011	13.0011	19.2308	25.7313
Rb1cc1	1000	773.489	725.518	763.412	841.186	697.133	633.977	656.827	592.109	696.991	601.334	672.864	681.096	815.782	753.477	631.28	792.648	710.048	806.557	801.164	800.596	711.893	893.699	769.515	789.952	1020.58	686.773	714.59	710.19	769.94	861.34
Fam150a	1000	3.4965	0	0	0	0	0	5.82751	4.662	0	2.331	0	1.1655	0	0	2.331	0	3.4965	0	4.662	1.1655	0	0	0	3.4965	6.99301	3.4965	17.4825	1.1655	0	8.15851
St18	1000	373.154	331.927	333.387	323.486	305.47	268.95	88.9466	74.3386	312.287	224.314	319.429	406.752	403.344	377.374	327.707	214.9	191.04	231.456	193.8	260.023	195.261	229.184	216.199	186.171	298.166	182.6	191.852	235.676	241.682	178.218
Pcmtd1	1000	1236.05	1221.71	1265.67	1369.84	1182.53	1106.84	1038.42	904.434	1118.5	1116.78	1127.48	1138.95	1365.06	1295.49	1090.41	1647.74	1445.53	1660.55	1455.08	1658.83	1289.76	1604.93	1535.36	1531.73	1730.7	1476.68	1621.18	1624.81	1685.02	1574.35
Sntg1	1000	219.774	199.119	245.8	253.511	220.876	182.594	212.889	174.745	200.358	161.526	179.84	183.283	243.184	207.932	188.929	195.263	195.676	203.387	182.319	203.938	176.26	205.453	178.326	186.725	221.84	149.546	181.768	186.725	199.394	203.938
Rrs1	1000	510.254	525.879	579.59	570.312	468.262	437.5	517.578	420.41	484.863	537.598	462.402	501.953	601.562	564.941	520.996	559.57	490.234	573.242	532.227	487.305	413.574	671.875	554.688	547.852	612.793	447.266	509.766	535.645	501.953	573.73
Adhfe1	1000	270.787	273.654	341.51	289.583	281.3	278.751	229.372	190.188	306.467	320.484	293.406	308.06	379.739	292.768	278.751	322.077	289.583	359.032	302.963	345.97	275.247	348.837	322.714	335.776	451.736	311.246	346.289	355.209	402.995	316.98
2610203C22Rik	1000	10.4418	12.0482	16.0643	16.0643	16.8675	22.49	12.0482	12.0482	17.6707	12.8514	15.261	15.261	11.245	13.6546	10.4418	20.0803	20.0803	8.83534	10.4418	20.0803	16.0643	12.8514	17.6707	15.261	19.2771	21.6867	25.7028	16.8675	16.0643	24.0964
3110035E14Rik	1000	3087.54	4320.68	3459.37	3501.73	4059.93	3382.49	6486.98	6280.2	3733.92	3319.11	3307.19	3320.36	3981.17	4467.84	3652.02	334.798	341.701	676.812	3265.14	443.05	3700.66	460.935	279.259	2700.03	4562.91	1526.83	2034.83	415.124	510.198	5631.94
Mybl1	1000	31.5008	34.7111	33.1059	32.504	32.9053	27.8892	57.3836	52.1669	32.504	27.8892	33.3066	27.6886	24.4783	30.0963	21.0674	42.3355	36.9181	41.9342	51.7657	39.5265	52.5682	67.4157	45.1445	46.9502	55.9791	31.7014	36.1156	30.6982	30.4976	48.5554
Vcpip1	1000	496.153	468.356	509.386	520.053	455.431	411.324	398.092	380.86	437.788	394.605	409.068	431.429	543.44	477.895	416.145	496.461	458.406	499.026	462.919	482.511	415.325	547.338	494.102	481.485	581.701	382.808	422.813	407.426	418.402	448.456
1700034P13Rik	1000	2.67738	3.34672	2.67738	1.33869	4.68541	4.01606	1.33869	0	0.669344	2.67738	1.33869	4.01606	3.34672	2.67738	2.00803	4.68541	4.68541	3.34672	0.669344	3.34672	2.67738	2.67738	4.68541	4.01606	4.01606	0	0.669344	1.33869	3.34672	2.67738
Sgk3	1000	93.0605	108.897	108.363	110.498	97.331	126.868	136.299	135.587	95.3737	103.381	93.5943	93.5943	99.2883	115.658	82.0285	323.132	292.171	486.477	236.121	321.708	205.16	310.854	394.306	419.395	337.189	439.68	364.769	383.63	407.295	288.968
Mcmdc2	1000	74.0306	61.888	74.0306	77.5558	48.1786	51.7039	48.1786	42.6949	50.1371	42.3032	45.4367	64.6298	75.989	52.4873	61.1046	35.6443	33.2942	32.1191	35.6443	38.7779	26.2436	27.8104	30.1606	49.3537	46.6118	39.953	48.1786	38.7779	43.4783	37.6028
Snhg6	1000	850.123	948.403	975.43	1009.83	884.521	823.096	884.521	759.214	921.376	761.671	1056.51	864.865	1009.83	894.349	1012.29	1233.42	980.344	1076.17	1095.82	1154.79	975.43	1226.04	1034.4	1086	1176.9	1115.48	1152.33	1206.39	1179.36	1149.88
Snord87	1000	81.0811	13.5135	27.027	13.5135	67.5676	67.5676	27.027	67.5676	67.5676	13.5135	67.5676	67.5676	40.5405	27.027	54.0541	27.027	13.5135	67.5676	54.0541	13.5135	13.5135	54.0541	94.5946	67.5676	81.0811	54.0541	27.027	27.027	148.649	54.0541
Tcf24	1000	6.67379	8.54245	8.27549	8.27549	5.60598	5.07208	3.20342	6.13988	5.33903	4.00427	6.40683	7.47464	5.60598	9.61025	3.73732	4.53817	9.07635	12.0128	4.00427	5.33903	4.80513	7.20769	9.07635	7.20769	5.33903	5.07208	5.87293	10.6781	7.74159	3.73732
Ppp1r42	1000	20.8044	16.6436	16.6436	22.8849	13.8696	25.6588	30.5132	14.5631	8.32178	22.1914	17.337	14.5631	17.337	19.4175	23.5784	20.8044	11.0957	33.2871	14.5631	24.2718	22.8849	19.4175	26.3523	45.7698	29.1262	24.9653	29.8197	31.9001	27.7393	29.8197
Cops5	1000	1475.56	1491.66	1530.19	1486.49	1497.99	1293.85	1431.28	1368.03	1416.33	1298.45	1406.56	1269.7	1565.84	1459.46	1325.47	1575.62	1380.1	1812.54	1563.54	1548.02	1341.58	1770.56	1683.73	1718.8	1837.84	1466.94	1361.13	1458.31	1427.26	1583.09
Cspp1	1000	325.218	312.356	356.224	378.043	293.983	290.308	316.72	290.537	273.771	309.371	310.519	331.419	358.751	325.448	288.93	279.283	286.633	320.625	257.235	294.442	236.794	281.121	269.637	336.243	365.181	259.531	316.031	313.275	319.706	274.69
Arfgef1	1000	964.925	888.952	1005.4	999.858	913.803	829.31	755.893	691.991	847.345	734.45	808.151	886.254	1050.98	950.582	776.91	909.259	873.615	936.098	846.492	871.769	761.147	1010.08	911.815	946.322	1027.55	781.454	822.636	727.634	815.535	837.262
Cpa6	1000	6.18557	5.6701	7.73196	11.8557	6.70103	3.09278	11.8557	19.0722	8.24742	12.3711	7.21649	7.73196	8.24742	3.09278	3.60825	0.515464	0	3.60825	5.15464	0.515464	6.18557	2.06186	0.515464	5.15464	11.3402	2.06186	3.60825	1.03093	0.515464	12.8866
Mir467e	1000	0	0	0	0	0	0	0	0	0	0	0	0	0	0	0	0	0	0	0	0	0	0	0	0	0	0	0	0	0	0
Prex2	1000	389.738	345.669	432.824	434.433	322.964	350.586	317.422	232.144	328.238	349.245	337.266	368.821	440.69	363.011	281.756	441.137	443.014	457.227	432.734	468.758	371.234	411.46	397.336	405.113	668.097	384.375	501.028	399.213	503.799	429.248
A830018L16Rik	1000	621.247	442.301	563.005	570.119	479.44	487.037	454.48	404.437	499.457	424.334	485.711	529.483	574.943	496.563	429.519	386.471	394.791	389.967	472.808	388.4	436.272	353.31	351.14	442.301	589.051	333.173	430.484	368.504	368.986	523.092
Mir6341	1000	0	0	0	0	0	0	0	0	0	0	0	0	0	0	0	0	0	0	0	0	0	0	0	0	0	0	0	0	0	0
Gm17644	1000	0	0	0	0	0	0	0	0.3125	0	0	0	0	0	0	0	0	0	0	0	0	0	0	0	0	0	0	0	0	0.3125	0
Sulf1	1000	39.0625	37.8289	39.2681	42.9688	34.7451	445.929	137.541	159.951	32.4836	43.1743	32.6891	66.8174	36.801	51.1924	26.9326	174.959	180.51	1558.18	271.382	205.592	217.722	170.23	930.715	1520.56	365.337	1149.05	238.898	150.905	206.003	281.456
Slco5a1	1000	34.0736	24.5565	34.5435	30.0787	28.7863	27.6113	15.5093	14.2169	20.6791	18.2117	24.674	21.2666	29.4912	26.5539	22.0891	84.5964	90.0012	84.2439	51.8153	95.0535	56.7501	68.2646	57.1026	49.1129	72.4944	41.3582	61.9199	73.4344	73.6694	47.1155
Prdm14	1000	0	0	0	0	0	0	0	0.385654	0	0	0	0	0.385654	0	0	0.385654	0	0	0	0.385654	0	0.385654	0.771307	0	0	1.15696	0.771307	1.54261	0.385654	0
Ncoa2	1000	708.833	704.839	795.043	775.076	685.459	608.762	681.936	644.82	669.72	625.675	589.852	686.399	788.818	738.078	625.088	894.409	858.938	913.907	811.957	858.938	720.695	976.627	901.691	896.171	1011.63	739.723	785.882	736.082	815.833	779.07
Tram1	1000	529.732	523.615	580.7	542.644	505.267	515.8	471.288	408.767	513.422	489.297	485.899	446.483	586.476	527.353	474.686	388.039	352.362	587.156	389.059	389.399	422.698	483.86	462.453	535.168	524.975	415.562	382.603	332.994	373.768	405.029
Lactb2	1000	360.36	311.606	478.007	385.798	375.199	332.803	316.905	304.187	373.079	268.68	299.417	280.869	502.915	326.444	359.3	443.561	370.429	670.906	407.525	438.792	330.154	490.196	494.966	561.208	523.582	397.986	305.776	361.42	366.72	370.959
Xkr9	1000	1.03842	1.03842	6.23053	0.519211	1.03842	0.519211	0.519211	0.519211	12.4611	2.07684	2.07684	0.519211	7.26895	0	2.07684	0	0	3.11526	0	0.519211	0	0	0	2.07684	2.59605	1.03842	0	0	0	0
Gm5523	1000	1.60643	4.01606	2.40964	0.803213	4.01606	2.40964	6.4257	1.60643	0.803213	0.803213	4.81928	1.60643	3.21285	2.40964	0.803213	0.803213	1.60643	1.60643	0.803213	1.60643	4.01606	4.01606	1.60643	0	2.40964	3.21285	1.60643	3.21285	2.40964	1.60643
Eya1	1000	248.101	240.506	297.814	295.052	225.777	208.976	144.764	110.242	216.571	179.287	202.301	209.436	270.656	228.999	202.301	113.924	121.979	147.526	132.336	131.646	113.234	127.043	153.28	131.876	145.455	98.9643	102.647	105.409	104.488	94.8216
Msc	1000	18.6372	31.4502	33.7798	41.3512	29.703	29.703	40.1864	38.4391	22.1316	32.615	34.9447	27.3733	44.8457	31.4502	22.714	7.57135	11.0658	12.813	14.5603	5.82411	11.0658	12.2306	13.9779	17.4723	24.4613	4.07688	8.73617	9.31858	6.98893	18.6372
Trpa1	1000	24.396	7.27187	14.7783	18.7661	11.0251	12.4326	1.64204	0.938306	12.4326	8.21018	1.40746	2.34577	3.28407	2.11119	0.469153	0.938306	0.234577	1.64204	0.469153	0	1.17288	0.469153	0.70373	0.70373	0.234577	1.40746	0.469153	0.234577	0.938306	1.17288
Kcnb2	1000	111.132	75.5321	116.406	110.19	87.2104	78.5459	105.858	84.9501	103.409	74.2136	92.8612	84.7617	145.979	105.293	97.1934	71.9533	85.8919	77.7924	68.3745	66.8676	50.4803	78.3575	64.4189	61.2168	92.1077	61.5935	84.5734	73.2718	84.1966	81.5596
Terf1	1000	202.822	205.026	232.363	207.231	182.54	163.58	217.813	195.767	157.848	197.09	206.79	196.649	220.899	201.058	159.171	168.43	146.825	187.831	145.503	157.407	147.707	155.644	149.471	186.067	214.727	143.298	152.116	172.84	182.54	182.981
Sbspon	1000	2.18341	2.54731	3.63901	7.64192	2.91121	14.9199	4.36681	1.4556	1.4556	5.09461	2.54731	4.00291	3.27511	4.73071	1.81951	6.91412	3.27511	36.0262	2.91121	4.73071	5.09461	17.4672	13.8282	23.2897	10.1892	13.4643	6.18632	4.73071	9.09753	5.09461
4930444P10Rik	1000	27.115	21.1497	19.5228	21.1497	26.5727	16.8113	17.8959	12.4729	16.8113	21.692	19.5228	18.4382	24.4035	17.3536	15.7267	4.33839	9.21909	11.3883	4.88069	13.0152	8.13449	8.67679	3.7961	12.4729	10.846	10.846	5.96529	15.1844	13.0152	10.846
Rpl7	1000	9018.22	9732.05	10453.4	9766.35	8705.25	8536.98	8006.43	7123.26	8593.78	8620.58	9506.97	8899.25	10785.6	9135.05	8973.2	11426.6	10481.2	12836	10228.3	11370.8	9882.1	12280.8	12058.9	12149	13591.6	10203.6	11063.2	11330.1	11443.7	10396.6
Rdh10	1000	238.78	237.037	279.739	237.908	191.721	262.309	158.606	154.684	243.573	204.357	211.765	268.41	262.745	217.429	186.928	192.157	225.708	431.373	160.349	224.401	187.8	238.78	307.19	384.314	267.974	316.776	206.972	228.322	234.858	211.765
Stau2	1000	1607.96	1535.64	1534.26	1645.67	1568.51	1453.98	1634.6	1554.33	1407.61	1310.73	1388.93	1415.92	1833.22	1619.72	1392.04	1347.4	1103.81	1246.71	1316.96	1258.13	1275.09	1504.15	1338.41	1371.63	1592.04	1278.55	1324.91	1204.5	1241.52	1671.97
Ube2w	1000	833.57	784.328	857.955	891.335	764.205	730.114	604.64	533.617	751.184	719.697	816.051	781.96	976.799	815.578	780.777	701.705	639.915	716.856	686.79	684.659	628.788	742.424	677.083	721.117	836.411	594.223	655.303	613.163	604.877	738.873
Tceb1	1000	3282.72	3347.64	3467.02	3570.68	3284.82	3024.08	3229.32	3006.28	3080.63	3058.64	3441.88	3249.21	4034.55	3483.77	3181.15	3495.29	3019.9	3654.45	3607.33	3482.72	3267.02	3851.31	3788.48	3627.23	4442.93	3349.74	3570.68	3421.99	3347.64	3865.97
D030040B21Rik	1000	0.71736	0.35868	0	0	0	0	0	0	0.71736	0.71736	0	0	0.71736	0.35868	0.35868	0	0.35868	0	0	0.35868	0	0	0	0	1.07604	0	0.35868	0.35868	0.35868	0.35868
Tmem70	1000	965.358	938.222	1048.5	1040.99	966.513	912.24	759.815	724.018	893.764	853.926	1027.14	941.686	1118.36	969.977	864.896	898.961	848.152	938.222	918.591	884.527	808.891	1054.85	963.048	1002.31	1050.23	862.009	858.545	823.903	859.7	1069.86
Ly96	1000	84.5771	49.7512	72.9685	81.2604	53.068	72.9685	43.1177	46.4345	61.3599	54.7264	84.5771	51.4096	72.9685	51.4096	67.9934	38.1426	33.1675	49.7512	28.1924	16.5837	34.8259	48.0929	33.1675	48.0929	58.0431	29.8507	51.4096	28.1924	23.2172	33.1675
Jph1	1000	773.455	585.188	815.685	683.378	623.466	599.126	245.059	219.68	541.918	433.534	663.824	712.919	1073.43	697.524	712.711	314.333	261.91	344.706	285.833	309.965	272.519	312.877	316.83	331.392	366.757	310.173	281.673	340.545	340.337	297.483
Gdap1	1000	1716.79	1530.35	1729.24	1776.73	1574.04	1482.6	1393.45	1296.42	1538.74	1446.53	1410.46	1480.31	1726.44	1645.16	1413.26	1681.99	1490.47	1625.1	1534.93	1649.23	1424.43	1850.14	1615.44	1637.54	1820.93	1254.76	1426.72	1295.15	1340.61	1580.14
Pi15	1000	9.38899	7.36675	6.64452	6.21118	7.65564	4.76672	0.866676	2.02224	6.93341	4.62227	9.67789	8.66676	10.2557	7.65564	7.07786	2.45558	9.1001	3.03337	6.78896	7.80009	2.02224	7.94453	4.04449	7.80009	6.78896	2.45558	6.50007	6.78896	5.20006	4.91117
Gm16070	1000	7.50883	9.27562	8.83392	10.6007	9.71731	5.30035	4.41696	3.09187	4.85866	3.09187	7.50883	7.95053	11.4841	6.18375	8.83392	8.83392	12.3675	11.0424	7.06714	20.318	4.41696	7.95053	8.83392	8.39223	4.85866	3.97527	4.85866	11.0424	13.2509	7.50883
Crispld1	1000	87.6186	74.8877	94.6081	93.36	77.1343	76.3854	35.1972	33.6995	81.8772	61.1583	74.8877	85.6216	118.323	100.849	68.3974	74.638	79.1313	70.8937	57.4139	71.8922	49.6755	76.635	63.9041	70.1448	65.6515	77.1343	81.8772	91.1133	103.844	75.1373
Crisp4	1000	0	0	0.838926	0	0	0	0	0	0	0	0	0	0	0	0	0	0	0	0	0	0	0	0	0	0	0	0	0	0	0
Defb44-ps	1000	0	0	0	0	0	0	0	0	0	0	0	0	0	0	0	0	0	0	0	0	0	0	0	0	0	0	0	0	0	0
Defb18	1000	0	0	0	0	0	0	0	0	0	0	0	0	0	0	0	0	0	0	0	0	0	0	0	0	0	0	0	0	0	0
Defb41	1000	2.1322	2.1322	0	0	0	0	0	0	4.26439	0	0	0	0	0	0	0	0	0	0	0	0	0	0	0	0	0	0	0	0	0
Gm15386	1000	0	0	0	0	0	0	0	0	0	0	0	0	0	0	0	0	0	0	0	0	0	0	0	0	0	0	0	0	0	0
Tfap2d	1000	0	1.71723	0.57241	1.71723	0	0.57241	0.57241	4.57928	1.14482	0.57241	0.57241	0	0	0.57241	0	0	0	0	18.3171	0	29.1929	4.00687	0	8.58615	2.86205	9.73097	0.57241	0	1.14482	23.4688
Tfap2b	1000	0.768994	3.53737	2.46078	4.30637	1.53799	7.38234	17.3793	13.2267	1.99938	4.61396	6.92095	1.38419	4.76776	1.23039	1.38419	0.461396	1.07659	0.922793	0.307598	0.768994	1.99938	2.30698	2.30698	4.15257	2.30698	2.92218	1.69179	1.99938	1.38419	1.53799
Pkhd1	1000	0.154703	0	0.232054	0.232054	0.154703	0	0.464109	0.386757	0.54146	0.0773515	0.232054	0.0773515	0.154703	0	0.154703	0.0773515	0.0773515	0.386757	0.0773515	0.0773515	0.154703	0.0773515	0.54146	0.386757	0.154703	0.309406	0.154703	0.54146	0.850866	0.232054
4930486I03Rik	1000	0	0	0	0	0	0	1.27226	1.27226	0	0	0	0	0	0	0	0	0	0	0	0	0	0	0	0	0	0	0	0	0	2.54453
Linc-md1	1000	0	0	0	0	0	0	0	0	0	0	0	0	0	0	0	0	0	0	0	3.83877	0	0	1.91939	0	0	0	0	1.91939	1.91939	0
Mir206	1000	0	0	0	0	0	0	0	0	0	0	0	0	0	0	0	0	0	0	0	0	0	0	0	0	0	0	0	0	0	0
Mir133b	1000	0	0	0	0	0	0	0	0	0	0	0	0	0	0	0	0	0	0	0	0	0	0	0	0	0	0	0	0	0	0
Il17a	1000	0	0	0	0	0	0	0	0	0	0	0	0	0	0	0	0	0	0	0	1.70794	0	0	0	0	0	0	0	0	0	0
Il17f	1000	1.69779	0	0	0	0.848896	0	0.848896	0.848896	0.848896	0	0	1.69779	0.848896	0	0	0	0	0	0.848896	1.69779	0	0.848896	0	0	3.39559	0	0	2.54669	5.09338	0.848896
Mcm3	1000	48.51	58.9051	63.7561	55.0936	51.9751	41.2335	42.6195	38.115	50.5891	44.0055	59.5981	64.4491	59.5981	71.7256	55.0936	60.9841	83.8531	81.4276	66.8746	91.8226	50.9356	107.762	72.4186	89.0506	110.88	65.4886	78.3091	96.3271	117.464	73.8046
6720483E21Rik	1000	32.1429	25.8929	56.25	39.2857	30.3571	46.4286	15.1786	26.7857	25	57.1429	50	33.9286	51.7857	41.9643	32.1429	27.6786	21.4286	32.1429	22.3214	35.7143	19.6429	25.8929	31.25	30.3571	44.6429	33.9286	16.9643	33.0357	26.7857	24.1071
Paqr8	1000	1454.3	1484.16	1568.78	1689.59	1305.66	1390.95	1338.69	1013.12	1476.02	1557.24	1734.84	1775.11	1935.52	1907.69	1382.35	1316.52	979.412	1173.08	1255.2	1233.26	1324.66	1678.28	1178.05	1313.57	1802.49	1422.62	1335.07	1133.26	1404.98	1638.69
Efhc1	1000	28.9855	28.0797	29.4384	25.8152	30.7971	54.3478	23.5507	27.1739	33.9674	34.8732	25.8152	49.8188	17.663	35.3261	24.0036	42.1196	75.1812	108.696	48.0072	65.2174	22.6449	65.2174	75.6341	138.134	62.0471	86.0507	57.971	60.2355	53.442	35.3261
Tram2	1000	14.3885	18.705	21.5827	10.7914	17.2662	17.2662	19.4245	12.2302	5.7554	13.6691	3.59712	16.5468	10.0719	12.9496	9.35252	10.0719	15.1079	36.6906	5.03597	7.19424	9.35252	17.2662	20.1439	29.4964	20.1439	22.3022	14.3885	20.1439	14.3885	7.91367
Tmem14a	1000	670.614	687.639	718.727	757.957	709.845	692.08	929.682	743.893	733.531	677.276	789.045	712.065	864.545	778.682	681.717	823.094	694.301	866.025	842.339	808.29	792.006	866.025	828.275	908.956	1083.64	890.452	1001.48	926.721	925.241	1126.57
Gsta3	1000	62.7329	111.18	808.075	61.4907	83.2298	37.2671	44.0994	42.236	693.168	155.901	62.1118	126.087	691.925	113.665	513.665	44.0994	44.0994	262.112	38.5093	54.0373	37.2671	31.0559	44.7205	108.696	128.571	120.497	72.6708	88.8199	96.8944	78.2609
Gm4956	1000	2.61324	0	0	0	0	0	0	0	0.87108	0	0.87108	0	13.0662	4.3554	14.8084	0	0	0	0	0	0	0	0	1.74216	0	0	0.87108	0.87108	0	0.87108
Khdc1a	1000	0	0	0	0.512821	0	0	0	0	0	0	0	0.512821	0	0	0	0	0	0	0	0	0	0	0	1.02564	0	0	0.512821	0	0	0
Khdc1c	1000	0	0	0	0	0	0	0	0	0	0	0	0	0	0	0	0	0	0	0	0	0	0	0	0	0	0	0	0	0	0
Khdc1b	1000	0	0	0	0	0	0	0	0	0	0	0	0	0	0	0	0	0	0	0	0	0	0	0	0	0	0	0	0	0	0
Kcnq5	1000	630.229	520.917	523.352	512.607	584.957	556.734	859.456	744.556	508.023	552.436	506.447	529.799	573.496	612.894	453.295	1000.86	1015.9	985.817	821.777	954.871	615.903	869.054	925.931	871.49	923.209	818.052	1092.55	1189.83	1141.69	1027.65
Rims1	1000	1647.16	1454.39	1540.69	1538.97	1489.06	1390.46	1752.64	1463.98	1478.24	1293.58	1155.64	1340.55	1635.6	1527.66	1128.84	860.585	805.508	931.153	1249.82	850.75	1329.73	987.952	777.231	1175.81	1875.58	968.035	967.544	753.135	912.712	1797.15
4933415F23Rik	1000	0	1.1236	3.37079	1.1236	1.1236	2.24719	0.561798	0	1.68539	1.1236	1.1236	0	0	0	0	0	1.1236	0	1.1236	1.1236	0	0	1.1236	0	0	0	0	0	0	0.561798
Mir30a	1000	0	0	0	0	0	0	0	14.0845	0	0	0	0	0	0	0	0	0	56.338	0	0	0	0	0	0	0	0	0	0	0	0
Mir30c-2	1000	11.9048	23.8095	11.9048	0	0	0	11.9048	35.7143	0	0	23.8095	0	23.8095	11.9048	47.619	59.5238	59.5238	71.4286	35.7143	59.5238	23.8095	47.619	59.5238	35.7143	59.5238	35.7143	0	95.2381	23.8095	11.9048
Ogfrl1	1000	2355.08	1855.9	2134.81	2245.25	2023.33	2010.94	1566.47	1435.59	1899.88	1709.54	2052.44	2081.34	2441.58	2076.8	1756.4	1565.24	1442.4	1529.52	1730.18	1516.1	1690.55	2013.63	1473.99	1700.25	1953.55	1438.89	1639.76	1487.2	1436.62	1914.95
B3gat2	1000	167.853	135.017	165.098	164.409	151.55	137.543	85.1894	78.76	151.55	121.929	133.869	146.498	144.432	151.78	112.514	97.3594	93.6854	81.7451	154.765	84.271	181.171	142.365	85.4191	115.729	92.3077	92.7669	80.3674	75.775	78.5304	150.861
Smap1	1000	1435.14	1509.46	1511.82	1503.72	1434.12	1342.57	1721.96	1629.39	1306.08	1311.49	1342.23	1343.92	1577.7	1402.36	1236.49	1079.73	895.946	1127.36	1259.8	1054.73	1265.2	1297.3	1082.77	1326.01	1638.51	1044.59	1216.89	1002.7	1064.19	1522.3
Sdhaf4	1000	778.111	866.567	962.519	947.526	898.051	938.531	892.054	688.156	863.568	793.103	857.571	805.097	1003	923.538	796.102	1041.98	764.618	1134.93	1025.49	977.511	890.555	1029.99	1062.97	1082.46	1070.46	833.583	875.562	884.558	893.553	938.531
Fam135a	1000	305.087	289.006	364.466	366.167	288.696	274.934	305.087	262.718	263.028	262.255	280.81	259.317	352.25	288.078	246.173	352.25	359.672	400.649	307.716	366.94	295.346	377.764	353.023	366.167	422.916	319.932	338.178	330.911	353.332	304.623
Col9a1	1000	9.65484	20.2752	13.2754	13.034	14.2409	6.27565	13.7581	14.4823	8.68936	8.68936	11.1031	12.5513	4.34468	8.93073	6.27565	10.1376	10.8617	15.2064	9.89621	10.6203	14.4823	8.44798	8.68936	10.1376	18.5856	4.10331	5.7929	13.5168	8.20661	6.27565
Col19a1	1000	173.781	176.153	194.935	177.86	169.987	151.205	267.976	202.523	155.758	149.308	175.678	147.221	235.344	193.132	160.216	73.8949	57.1049	72.9463	98.8427	72.472	109.562	62.9862	58.8124	90.3054	158.319	84.8036	89.262	88.4083	93.8152	151.3
Lmbrd1	1000	1519.47	1584.76	1535.05	1675.07	1505.38	1359.79	1842.36	1641.51	1375.74	1472.18	1314.54	1360.35	1591.06	1606.64	1343.84	1878.71	1663.76	2079.56	1817.32	1853.3	1711.61	2060.09	1959.76	2041.36	2332.53	1855.71	1787.28	1693.25	1817.88	1942.32
Adgrb3	1000	1145.24	1058.49	1231.8	1214.96	1121.88	948.569	801.883	789.388	1009.05	897.501	985.15	973.56	1341.54	1150.13	1072.08	1266.75	1193.95	1236.51	1116.08	1262.95	883.194	1292.1	1220.75	1158.09	1193.05	945.129	1155.92	1159.18	1185.44	1097.25
Gm20172	1000	5.15796	3.22373	9.67118	7.0922	4.51322	3.22373	15.4739	5.15796	5.15796	3.22373	1.28949	5.15796	4.51322	3.86847	0.644745	1.28949	7.73694	6.44745	5.15796	5.80271	1.28949	0.644745	2.57898	1.93424	1.93424	1.28949	2.57898	1.28949	3.22373	3.22373
4931408C20Rik	1000	0	0	0	0	0	0	0.230894	0	0	0	0	0	0	0	0	0	0	0	0	0	0	0	0	0	0	0	0	0	0	0
Gm597	1000	0	0.693963	0	1.04094	0.346981	0	0	0	0.693963	0	0.346981	0	1.04094	1.04094	0.346981	0.346981	0	0.693963	0	1.04094	0.693963	1.73491	0.693963	0.346981	1.04094	1.04094	0	0	0.693963	0
Mir6342	1000	0	0	0	0	0	0	0	0	0	0	0	0	0	0	0	0	0	0	0	0	0	0	0	0	0	0	0	0	0	0
Phf3	1000	695.675	652.691	778.468	740.643	660.495	587.356	588.282	552.043	598.466	557.995	650.84	646.872	752.414	668.562	556.408	786.007	776.881	893.665	737.733	761.01	625.182	860.336	813.914	842.746	847.242	662.479	747.123	774.236	738.659	662.346
Ptp4a1	1000	132.235	155.97	144.587	152.822	130.298	124.243	157.907	129.814	119.884	143.618	140.228	146.282	141.439	150.4	128.845	149.915	121.095	160.087	140.954	148.22	161.298	171.47	135.626	147.736	204.65	130.298	132.235	141.681	143.618	166.142
Gm13363	1000	0	0	0	0	0	0	0	0	0	0	0	0	0	0	0	0	0	0	0	0	0	0	0	0	0	0	0	0	0	0
4931428L18Rik	1000	0	0	0	0	0	0	0	0	0	0	0	0	0	0	0	0	0	0	0	0	0	1.82815	0	0	0.914077	0	0	0	0	0
Lgsn	1000	0	0.525486	0.525486	0	0	0	0	0	0	0	0	0	0	0	0	2.62743	0.525486	1.05097	2.62743	0	0.525486	0	1.05097	1.05097	1.57646	1.05097	0	1.05097	0	0
Pih1d3	1000	0	0	0	0	0	0	0	0	0	0	0	0	0	0	0	0	0	0	0	0	0	0	0	0	0	0	0	0	0	0
Gm4850	1000	0	2.18818	1.09409	0	0	2.18818	0	0	0	0	0	0	0	0	0	1.09409	0	0	0	0	0	0	0	0	0	1.09409	0	0	0	0
Khdrbs2	1000	354.673	233.26	378.219	401.03	291.391	269.316	210.449	189.11	276.674	220.015	261.221	292.862	374.54	215.6	245.769	503.311	532.009	483.444	315.673	451.067	218.543	454.746	415.011	464.312	362.767	203.826	356.144	387.785	364.974	278.882
Gm9839	1000	0	0	0	0	0	0.695894	0	0	0	0	0	0	0	0	0	0	0	0	0	0	0	0	0	0	0	0	0	0	0	0
Gm5415	1000	0.533618	0	0	0	0	0.800427	0	0	0	0.533618	0.266809	0.533618	0	0	0	0	0	0	0	0	0	0	0	0	0	0	0	0	0	0
Prim2	1000	145.749	141.7	143.725	175.607	138.158	110.324	129.555	137.652	131.073	128.036	106.781	103.239	123.988	109.312	105.263	201.417	179.656	202.935	218.117	213.057	176.113	205.466	211.032	200.911	197.368	144.737	137.146	127.53	154.352	153.846
1700001G17Rik	1000	17.9978	14.6232	10.1237	10.1237	6.74916	3.37458	11.2486	16.8729	12.3735	12.3735	4.49944	6.74916	15.748	10.1237	17.9978	10.1237	8.99888	7.87402	4.49944	7.87402	14.6232	12.3735	10.1237	16.8729	21.3723	7.87402	15.748	13.4983	16.8729	12.3735
Rab23	1000	329.619	333.63	336.082	358.146	311.79	295.075	296.858	288.834	293.292	283.708	330.065	336.528	350.123	342.322	278.805	345.22	333.853	366.615	320.927	350.568	305.326	399.153	342.322	378.427	445.286	295.743	332.962	313.795	330.065	329.396
Bag2	1000	219.835	208.264	225.895	240.22	219.284	190.634	246.281	230.303	193.939	195.041	180.165	186.226	230.303	174.105	170.248	112.397	115.702	148.209	130.028	120.661	138.292	148.76	112.397	163.085	166.391	92.562	113.499	81.5427	93.1129	121.212
Zfp451	1000	247.185	232.759	282.196	273.927	233.11	218.684	226.249	213.054	223.258	209.887	228.184	232.407	272.343	242.787	219.036	254.222	243.842	269.177	215.165	244.018	199.859	271.112	247.009	265.834	294.335	210.415	229.592	231.879	240.852	231.527
Gm15455	1000	0.66313	0.994695	1.32626	1.32626	2.65252	2.32095	1.65782	0.66313	0.66313	2.65252	1.65782	2.32095	1.98939	1.65782	0.331565	0.331565	1.65782	1.98939	0	1.65782	0.66313	1.65782	1.98939	0.66313	0.994695	0.331565	2.32095	0.994695	0.994695	1.32626
Bend6	1000	2008.73	2194.59	2202.88	2447.64	2088.57	1821.99	3349.04	2811.52	1976	2218.59	1981.68	1668.85	2102.09	1956.37	1742.15	2011.78	1515.71	1743.89	2231.68	1873.47	2425.83	2938.48	1863	2023.12	2821.12	1733.42	1676.7	1634.82	1652.71	2779.23
Dst	1000	749.642	809.206	799.873	842.405	721.343	704.143	800.84	709.71	734.476	725.476	638.912	640.645	802.707	766.108	667.878	1199.86	1136.03	1207.46	1084.8	1150.03	970.468	1287.09	1090.1	1128.8	1394.32	1009.27	1065.26	1037.7	1158.13	1034.23
Mir6896	1000	0	0	0	0	0	0	13.6986	0	0	0	0	0	0	0	0	0	0	0	0	0	0	0	0	0	0	0	0	0	0	0
Mir5103	1000	63.2911	12.6582	37.9747	37.9747	63.2911	25.3165	12.6582	37.9747	12.6582	37.9747	25.3165	63.2911	126.582	50.6329	63.2911	37.9747	37.9747	177.215	50.6329	151.899	37.9747	50.6329	113.924	50.6329	37.9747	101.266	37.9747	12.6582	113.924	113.924
Ccdc115	1000	529.032	543.695	597.654	568.915	466.276	534.897	411.144	436.95	546.628	446.334	506.158	467.449	626.979	541.349	520.821	587.683	548.974	629.912	564.223	600	456.305	669.795	654.545	634.604	632.845	549.56	520.235	587.683	584.751	566.569
Imp4	1000	338.373	350.378	357.048	371.276	354.824	346.821	309.026	320.587	329.924	337.928	316.141	347.265	399.289	409.071	340.151	468.208	401.956	459.315	405.514	446.865	375.723	495.776	445.087	445.531	504.224	416.63	411.739	413.517	476.656	408.626
Ptpn18	1000	36.8722	48.3153	64.2085	51.494	38.1437	47.6796	39.4151	27.3363	30.5149	52.1297	55.9441	50.8582	46.4081	50.8582	38.7794	41.3223	35.6008	89.6376	29.2435	33.6936	35.6008	50.8582	38.7794	92.1805	54.6726	75.6516	35.6008	44.501	42.5938	36.2365
Prss39	1000	0	0	0.802568	0.802568	0	0	0	0	0	0	0	0	0	0	0	0	0	0	0	0	0	0	0	0	0	0	0	0	0	0
Cfc1	1000	3.85356	0	0	3.85356	0	2.89017	0	0	0	0.963391	0	2.89017	3.85356	4.81696	0	0	4.81696	0.963391	0	0	0	0	0	0	0	0	0	0	0	0
Prss40	1000	0	0	0	0	0	0	0	0	0	0	0	0	0	0	0	0	0	0	0	0	0	0	0	0	0	0	0	0	0	0
Amer3	1000	791.093	575.298	861.111	735.996	643.48	598.255	353.994	353.994	646.924	521.35	564.968	620.983	823.003	572.084	571.625	389.807	367.309	370.523	343.205	374.197	332.645	391.185	360.652	402.893	398.76	295.225	340.909	311.754	342.975	377.41
AA619741	1000	0	0	0.373692	0.373692	0	0	0	0.373692	0	0	0	0	0	0	0	0	0	0	0	0	0	0.373692	0	0	0	0	0.747384	0	0	0.373692
Arhgef4	1000	5589.9	4898.67	5831.61	5388.36	4948.05	4811.72	4295.87	3612.01	4851.14	4696.02	5324.24	5455.42	6357.41	5483.05	5012.16	3319.82	3068.9	3481.95	3680.18	3394.25	3498.53	3501.47	3578.48	3826.09	4476.05	3373.62	3725.87	3549.74	3753.87	4491.89
Fam168b	1000	3013.39	3021.06	3347.83	3312.99	2908.27	2807.48	3163.78	2692.72	2819.49	2843.7	2850.59	2962.8	3621.26	3277.95	2895.67	3451.18	3045.47	3337.99	3334.06	3274.41	3018.11	3706.3	3320.87	3422.83	3940.55	3109.06	3319.09	3176.57	3460.83	3752.56
Plekhb2	1000	1992.69	2160.36	2109.89	2228.93	1902.18	1869.45	2415.62	2216.68	1946.61	2032.73	1720.06	1802.52	1953.74	1997.99	1693.55	3034.74	2773.63	3329.31	2856.46	2988.3	2579.63	3373.56	3124.34	3213.02	3449.63	2889.56	2880.23	2700.68	3002.74	2960.14
Hs6st1	1000	614.681	699.382	788.384	732.455	640.764	609.572	801.291	696.424	620.059	669.804	711.482	657.166	842.969	778.166	674.375	766.604	629.201	844.044	840.817	713.902	815.542	949.449	842.969	895.133	892.175	824.415	730.304	711.482	766.604	843.237
Uggt1	1000	337.8	322.295	343.56	364.049	306.9	324.178	327.833	298.261	303.799	292.059	316.093	325.174	379.666	335.696	294.385	389.633	359.508	450.548	370.694	352.198	308.34	406.69	397.829	438.144	454.203	387.086	377.45	358.068	380.662	374.017
Mir6897	1000	0	0	0	0	0	0	0	0	0	0	0	0	0	0	0	16.129	0	16.129	0	0	0	0	0	0	0	0	0	0	0	16.129
Neurl3	1000	18.9702	20.5188	26.326	17.0345	18.583	24.7774	21.2931	21.2931	19.7445	18.9702	15.0987	23.616	18.1959	18.9702	18.583	33.2946	29.036	34.8432	31.746	39.8761	28.6489	32.5203	26.7131	33.6818	34.8432	26.7131	31.3589	31.746	27.1003	19.7445
Arid5a	1000	67.311	79.7377	75.768	76.4584	66.1029	69.3821	71.971	52.6407	62.1332	76.2858	68.6918	66.6206	70.9355	89.9206	74.0421	57.4732	51.7777	59.5444	52.8133	57.8184	61.9606	85.6058	51.0873	56.7829	77.3214	61.7881	64.3769	64.3769	78.0117	65.7577
Kansl3	1000	808.063	852.67	828.008	843.877	748.445	749.089	791.551	716.92	741.583	771.606	876.474	918.507	1013.08	983.058	844.735	820.931	779.327	939.095	780.184	752.52	760.669	980.27	894.274	963.328	955.394	847.738	829.294	800.986	899.85	875.402
Mir6898	1000	0	0	0	0	0	0	0	0	0	0	0	0	0	0	0	0	12.987	0	0	0	0	0	0	25.974	12.987	0	0	0	0	0
Fer1l5	1000	0.158278	0.79139	0.316556	0.79139	0.316556	0.158278	0.158278	0	0.316556	0.158278	0.474834	0.316556	0.316556	0.158278	0	0.474834	0.158278	0	0.158278	0.633112	0	0.474834	0.316556	0.633112	0.316556	0	0	0.316556	0.316556	0.474834
Lman2l	1000	1163.6	1048.99	1148.31	1211.69	1035.51	1059.78	583.82	546.067	1018.43	953.258	1043.6	1155.96	1223.37	1115.96	956.854	1041.8	995.955	997.303	920.449	950.562	829.663	927.64	931.685	1066.97	992.36	734.382	844.944	734.831	776.18	728.539
Cnnm4	1000	183.763	170.231	190.528	168.922	161.938	168.267	151.899	147.316	174.814	153.863	186.163	212.353	236.796	193.365	186.163	142.951	158.01	181.362	139.022	146.224	128.983	173.069	134.221	183.326	181.362	160.192	182.017	156.918	169.577	202.75
Cnnm3	1000	339.012	367.405	382.926	365.133	343.366	344.501	324.058	292.069	319.894	337.687	340.905	339.58	417.944	362.294	338.633	365.701	340.905	423.244	349.612	365.512	309.483	413.023	380.087	409.994	461.67	326.14	334.658	356.616	346.962	311.187
Ankrd23	1000	90.5834	79.3245	103.378	94.6776	72.1597	98.26	72.1597	66.5302	74.2068	69.6008	101.842	93.1423	94.6776	101.842	96.2129	53.2242	68.5773	77.2774	49.6418	59.8772	61.9243	71.6479	62.436	72.1597	99.2835	73.1832	70.1126	76.7656	80.348	72.6714
Ankrd39	1000	234.602	208.287	231.803	248.04	189.81	175.252	255.319	236.842	193.169	222.844	222.844	198.208	243.001	236.282	197.088	167.973	193.169	243.001	185.89	194.289	170.213	229.003	222.284	218.365	259.798	159.015	161.814	188.13	180.851	183.651
Sema4c	1000	133.038	156.57	172.88	160.531	170.55	135.601	177.54	164.958	142.125	171.249	148.183	136.067	148.416	178.239	128.145	209.459	174.744	189.655	174.045	205.732	190.354	199.441	178.239	202.936	239.515	181.267	184.529	196.645	205.499	192.684
Fam178b	1000	1.94628	3.89257	2.33554	2.33554	4.28182	1.94628	2.33554	1.55703	1.55703	3.50331	3.11405	3.11405	1.94628	3.11405	2.7248	5.83885	2.33554	5.44959	5.44959	5.44959	7.78513	6.2281	4.28182	3.50331	12.4562	8.17439	5.06033	8.9529	9.73141	7.00662
Cox5b	1000	12546.6	15038.7	15924.4	14372.6	13655.5	12964.9	14650.3	12019.3	13720.6	12826	14931.5	12790.9	16690.7	14386.6	14290	16406	14261.9	17959.6	16355	14869.9	14706.5	18935	16715.3	18353.3	17281.2	16706.5	14878.7	15794.4	16732.9	17333.9
Actr1b	1000	4637.94	4671.64	5034.67	4927.3	4513.72	4481.95	5194.03	4831.49	4399.61	4483.87	4495.91	4694.75	5631.68	5173.33	4507.94	4351.47	3924.41	4588.83	4446.8	3976.89	4351.47	4883.49	4288.4	4802.12	5403.47	3896.49	3841.12	3662.98	3878.19	5230.62
4933424G06Rik	1000	7.9858	7.09849	15.0843	8.87311	10.6477	5.32387	13.3097	10.6477	9.76043	11.535	10.6477	8.87311	9.76043	8.87311	2.66193	7.09849	3.54925	4.43656	4.43656	10.6477	6.21118	3.54925	5.32387	2.66193	9.76043	2.66193	4.43656	2.66193	0.887311	4.43656
Zap70	1000	101.066	60.6395	56.9644	81.9552	67.6222	76.075	31.2385	21.6832	78.6476	71.6648	96.6556	106.211	102.536	88.5704	85.9978	9.55531	7.71775	17.6406	8.08526	12.4954	13.9655	34.9136	11.0254	19.1106	18.0081	13.9655	12.8629	13.9655	11.3929	18.0081
Tmem131	1000	956.933	879.047	1017.41	1024.89	864.692	820.403	696.854	688.76	795.052	758.552	809.102	880.422	1123.24	895.235	887.599	778.1	773.519	848.503	694.869	731.063	601.558	911.118	777.031	829.414	902.566	668.296	802.077	728.009	790.318	714.569
Cnga3	1000	0.521921	2.6096	2.34864	0.782881	2.08768	1.3048	0	0.521921	0.782881	0.521921	1.3048	1.04384	0.782881	1.3048	0.782881	1.04384	0	0.26096	0.26096	0.26096	0.26096	1.04384	0	0.782881	0.782881	1.3048	1.82672	0.521921	0.782881	1.3048
Inpp4a	1000	948.571	948	1004.71	1074.29	949.143	858	1087.86	1047.14	892.857	855	962.286	958.714	1080.29	1003	874.143	1207.43	1163.86	1230	1202.71	1164.57	1036.71	1263	1113	1267.57	1368.57	1078.86	1361.29	1177.43	1217.57	1349
Coa5	1000	1139.31	1190.06	1236.41	1271.1	1126.88	1101.76	1091.4	1021.49	1102.02	1003.37	1147.85	1158.98	1373.64	1234.08	1113.67	1606.16	1542.98	1820.04	1500	1677.89	1326	1677.11	1718.02	1634.39	1771.88	1407.82	1530.81	1561.11	1595.29	1515.28
Unc50	1000	974.504	1006.37	1074.36	1107.65	1007.08	914.306	959.632	841.36	949.717	926.346	1002.83	923.513	1206.8	1134.56	1031.87	1185.55	992.21	1274.08	1133.85	1097.73	1060.91	1279.04	1168.56	1170.68	1332.86	1082.86	1060.2	1048.16	1104.11	1146.6
Mgat4a	1000	301.062	312.233	335.126	342.711	308.647	280.927	302.993	269.894	291.684	284.788	319.542	298.442	353.882	359.399	304.786	393.463	363.122	444.628	353.606	390.015	315.819	431.113	419.942	412.633	405.875	360.364	382.982	353.606	354.02	365.467
4930594C11Rik	1000	4.35572	3.99274	6.89655	5.44465	5.44465	2.54083	2.90381	1.08893	4.71869	2.54083	5.80762	2.90381	2.54083	5.08167	3.26679	1.45191	2.17786	3.62976	3.26679	3.26679	0.725953	1.81488	1.45191	3.26679	2.17786	1.81488	2.17786	1.45191	1.81488	2.90381
2010300C02Rik	1000	4785.6	4391.65	5580.6	4941.53	4760.38	4323.09	2532.22	2568.91	4084.61	3637.47	5732.86	6134.37	8406.79	6550.56	6905.76	4589.31	4070.63	4376.52	3813.12	4215.78	3150.42	4072	4466.64	4211.19	4137.81	4354.05	4955.51	4948.41	5378.81	4281.13
Tsga10	1000	203.969	175.514	169.775	203.252	147.298	153.754	104.017	104.495	146.581	150.885	157.341	186.753	203.73	183.166	150.407	157.102	171.688	164.993	132.233	159.971	124.821	152.319	133.668	187.709	198.47	142.994	169.536	147.059	164.036	142.755
Lipt1	1000	111.254	114.469	129.904	117.042	100.965	111.254	129.26	139.55	117.042	84.8875	86.8167	117.042	132.476	102.894	111.897	111.254	109.968	131.833	115.756	129.26	86.8167	120.9	129.26	131.833	131.19	100.965	119.614	145.981	130.547	131.19
Mitd1	1000	254.679	277.461	219.691	274.207	234.337	248.169	217.25	201.79	205.045	235.151	206.672	222.132	261.188	255.492	208.299	228.641	239.219	296.176	190.399	195.281	206.672	270.138	275.834	275.834	301.058	228.641	234.337	240.033	244.915	227.014
Mrpl30	1000	2031.84	2185.24	2202.6	2253.26	2023.15	1946.45	2218.52	2052.1	2231.55	1963.82	2354.56	2030.39	2418.23	2301.01	2178	2277.86	2109.99	2442.84	2340.09	2244.57	2091.17	2602.03	2318.38	2405.21	2868.31	2127.35	2348.77	2314.04	2422.58	2633.86
Lyg2	1000	8.19033	1.56006	1.17005	0.390016	6.24025	2.73011	0.390016	0	7.02028	4.29017	1.56006	9.36037	0.780031	7.80031	5.0702	0.780031	7.02028	3.12012	3.51014	6.24025	1.17005	3.12012	6.63027	3.90016	1.17005	3.90016	3.51014	3.51014	6.24025	2.73011
Lyg1	1000	0	0	0	0	0	0	0	0	0	0	0	0	0	0	0	0	0	0	0	0	0	0	0	0	0	0	0	0	0	0
Txndc9	1000	427.981	392.08	451.262	454.743	379.896	412.533	354.874	321.584	368.799	343.56	400.131	397.302	464.099	423.847	391.427	475.849	439.948	535.03	463.446	467.798	395.126	513.49	488.033	502.829	494.778	410.139	469.756	448.651	458.877	461.923
Eif5b	1000	534.949	514.429	574.965	577.273	505.964	469.155	435.167	400.41	474.157	413.621	494.549	503.142	634.603	513.659	488.265	505.964	477.363	564.704	482.109	494.549	416.57	570.348	550.981	543.414	575.734	473.9	477.62	451.071	448.378	473.259
Rev1	1000	451.197	395.12	502.581	486.391	415.298	363.914	355.702	325.903	382.215	376.115	442.75	447.677	520.882	457.062	433.599	516.424	459.409	549.977	493.43	485.218	397.701	520.648	504.693	505.866	555.608	446.973	502.346	552.792	538.949	479.352
Aff3	1000	466.556	481.589	509.861	482.278	483.933	431.665	397.738	375.534	441.318	401.876	420.08	438.836	556.061	523.79	470.556	586.402	554.268	599.228	503.793	562.819	445.87	575.369	588.195	553.993	569.99	640.325	671.494	593.022	592.608	562.129
Lonrf2	1000	1693.32	1480.01	1698.05	1659.05	1508.96	1413.63	1415.99	1444.55	1510.34	1396.89	1227.89	1468.39	1734.09	1568.05	1352.77	1915.7	1825.88	1814.85	1704.16	1806.97	1430.18	2096.32	1813.87	1786.88	1946.03	1370.1	1661.41	1456.57	1599.76	1621.63
Chst10	1000	1000.64	1006.09	1035.91	1087.85	939.083	887.785	1016.03	955.755	907.663	939.724	949.984	883.296	1118.95	982.366	850.914	1317.09	1230.2	1315.49	1236.93	1248.8	1120.87	1489.58	1345.62	1298.49	1381.53	1120.87	1260.34	1187.88	1226.03	1293.68
Nms	1000	1.998	0	0	0	0	0	0	0.999001	0	0	1.998	0.999001	0.999001	1.998	0	2.997	0.999001	4.995	0.999001	3.996	0.999001	3.996	0.999001	14.985	1.998	0	5.99401	1.998	0	0
Pdcl3	1000	481.829	568.581	600.821	593.2	555.686	462.485	527.55	450.762	446.659	509.965	511.137	508.206	586.166	573.857	459.555	712.778	681.712	827.081	664.127	733.294	629.543	852.872	803.048	742.673	761.43	647.714	643.025	671.161	664.127	659.437
Mir6349	1000	0	0	0	0	0	10.3093	0	0	0	0	0	0	0	0	0	0	0	0	0	0	0	0	0	0	0	0	0	0	0	0
Npas2	1000	184.211	266.986	234.45	254.067	252.392	193.541	528.947	510.287	237.799	270.096	271.053	237.799	311.483	263.397	242.584	848.325	761.962	774.88	715.55	773.684	570.574	689.713	743.541	776.077	736.124	914.593	1158.61	1103.35	1186.6	919.139
Rpl31	1000	4114.92	4762.97	4920.99	4542.7	4345.57	4152.43	5196.33	4217.08	4347.96	4416.6	4955.31	4303.27	5168.4	4523.54	4401.44	6885.08	6391.06	7860.34	6792.5	7044.69	5853.15	7474.86	6836.39	7374.3	7770.95	6997.61	8177.97	8187.55	8606.54	7532.32
Tbc1d8	1000	132.237	150.71	158.369	159.495	132.462	132.012	216.715	241.946	145.078	160.171	141.248	135.391	138.995	132.237	121.874	1147.78	972.066	1152.06	831.494	973.192	635.053	940.752	1044.38	943.681	954.945	1290.38	1590.9	1534.81	1590.45	1100.92
Cnot11	1000	511.371	459.255	520.531	565.066	508.212	460.518	483.26	465.572	456.728	427.353	485.155	438.408	565.698	501.579	484.207	516.74	502.843	595.389	542.325	545.483	445.989	615.919	549.274	589.387	591.598	445.673	506.633	506.001	504.422	548.642
Snord89	1000	340.426	234.043	340.426	287.234	265.957	372.34	191.489	127.66	351.064	223.404	212.766	255.319	234.043	308.511	319.149	148.936	180.851	223.404	117.021	234.043	223.404	234.043	148.936	138.298	234.043	297.872	372.34	276.596	180.851	244.681
Rnf149	1000	578.882	563.681	599.836	637.223	557.518	544.782	469.597	468.365	506.574	539.441	548.069	572.309	697.617	570.255	534.1	554.643	489.729	570.255	498.767	553.41	459.326	582.169	563.681	617.913	638.044	543.961	605.588	589.154	583.402	613.804
Creg2	1000	1872.56	1840.14	2071.05	1993.79	1723.06	1651.66	1433.7	1488.53	1652.53	1510.78	1694.09	1788.76	2400.41	2054.49	1872.56	737.713	717.365	749.267	827.212	743.749	735.472	795.654	674.772	893.43	1164.51	670.46	900.5	741.335	778.583	1102.09
Rfx8	1000	16.5	9	10	12	7.5	9	2.5	5	10.5	11.5	13	8.5	15	10	11.5	5	4	7.5	3.5	3	3.5	4	5	8	6	2	5.5	5.5	6.5	3.5
Gm3646	1000	8.35655	0	0	0	0	0	0	0	0	0	5.57103	0	0	2.78552	0	0	0	0	0	0	2.78552	0	0	0	0	0	2.78552	0	0	0
1700066B17Rik	1000	0	1.88324	0	0	1.88324	0	0	0	0	1.88324	0	0	0	0	1.88324	0	3.76648	1.88324	1.88324	3.76648	3.76648	1.88324	1.88324	9.4162	0	1.88324	3.76648	7.53296	3.76648	1.88324
Map4k4	1000	1160.53	1440.24	1268.16	1297.12	1222.97	1078.51	1080.85	910.947	1125.21	1139.77	1096.25	1209.24	1251.42	1412.45	1088.22	1370.27	1260.63	1569.97	1280.05	1381.15	1257.62	1702.54	1417.14	1401.57	1687.31	1275.03	1263.98	1451.79	1555.07	1267.83
Gm16894	1000	62.9371	58.2751	87.4126	53.6131	61.7716	62.9371	36.1305	52.4476	74.5921	51.2821	45.4545	52.4476	82.7506	59.4406	29.1375	69.9301	88.5781	94.4056	53.6131	88.5781	58.2751	80.4196	88.5781	69.9301	94.4056	61.7716	64.1026	72.2611	94.4056	57.1096
Il1r2	1000	5.20833	3.72024	5.20833	9.67262	2.97619	1.4881	12.6488	7.44048	8.92857	6.69643	2.97619	2.23214	4.46429	3.72024	2.23214	10.4167	4.46429	8.18452	8.18452	5.20833	3.72024	2.23214	1.4881	8.18452	9.67262	2.23214	11.9048	10.4167	6.69643	14.1369
Il1r1	1000	219.464	121.351	205.164	220.655	135.055	181.728	35.9484	28.5998	159.682	120.159	228.798	225.223	295.531	171.4	166.236	22.6415	24.0318	105.462	25.2234	24.429	29.5929	34.5581	64.1509	84.8064	42.3039	76.6634	33.565	32.9692	28.5998	36.3456
Il1rl2	1000	5.12821	9.23077	6.66667	7.17949	9.23077	8.20513	8.71795	13.3333	6.15385	4.10256	8.71795	10.2564	7.69231	10.2564	6.66667	11.2821	9.23077	14.359	19.4872	14.359	6.15385	12.3077	11.7949	12.8205	17.9487	8.20513	12.8205	13.8462	12.8205	9.74359
Il1rl1	1000	0.845547	1.40924	1.97294	3.10034	1.55017	1.55017	1.55017	1.83202	3.10034	0.845547	1.55017	1.83202	2.25479	2.67756	1.83202	2.11387	0.845547	2.39572	2.81849	2.81849	1.40924	3.24126	2.25479	3.52311	2.39572	3.38219	0.704622	2.67756	2.25479	1.1274
Il18r1	1000	0.209161	0	1.04581	0.418323	0.209161	0.418323	0.209161	0	0.209161	0	0	0.418323	0	0	0	0.209161	0	0.209161	0.627484	0.209161	0.209161	0	0.836645	0	0.209161	0.209161	1.04581	0.209161	0	0
Il18rap	1000	1.43179	1.43179	1.43179	0.818163	1.63633	0.818163	1.0227	0.613622	0.204541	0.613622	0.204541	1.22724	1.22724	0.818163	1.43179	0.613622	0.204541	0.613622	0	0.204541	0.409082	0.204541	0	0.613622	1.63633	0.204541	1.43179	0.409082	0	0.409082
Slc9a4	1000	227.63	178.179	136.578	156.463	186.028	171.376	8.11094	8.63422	203.035	156.724	173.469	234.171	215.332	243.066	181.58	1.30822	0.261643	0.523286	1.8315	0.784929	3.40136	0	0.261643	1.30822	2.35479	1.56986	5.23286	0	1.30822	2.35479
Slc9a2	1000	342.113	412.826	365.875	343.831	393.072	391.068	58.9751	47.5236	348.984	322.645	396.221	423.705	553.679	524.478	408.245	161.18	136.845	184.082	127.97	162.897	120.527	152.018	184.941	160.034	154.309	172.345	198.683	223.59	227.598	146.293
Mfsd9	1000	127.538	98.3503	117.386	131.345	135.787	107.551	81.2183	75.1904	112.627	92.9569	101.206	95.4949	127.855	109.137	85.6599	109.454	72.9695	113.579	101.206	105.964	87.8807	112.627	108.185	111.675	111.358	84.0736	83.4391	81.5355	77.4112	86.6117
Tmem182	1000	0.912409	2.73723	2.73723	0	0.912409	0.912409	0	1.82482	2.73723	0.912409	0.912409	0	0	0	0	3.64964	4.56204	10.0365	0	1.82482	11.8613	4.56204	3.64964	2.73723	2.73723	2.73723	2.73723	6.38686	5.47445	1.82482
4930448I06Rik	1000	0	3.4904	1.7452	1.7452	0	0	0	0	0	0	1.7452	1.7452	0	0	0	0	0	0	0	0	0	0	0	0	0	0	0	0	0	0
Pantr1	1000	2708.79	3476.19	3457.88	3304.03	2967.03	2815.02	2540.29	1902.93	2646.52	2626.37	3195.97	2774.73	3979.85	3404.76	3573.26	2996.34	2642.86	2946.89	2606.23	2917.58	2553.11	2805.86	2586.08	2540.29	3496.34	2419.41	3360.81	3210.62	3269.23	2930.4
Pou3f3	1000	1193.21	1597.58	1655.68	1588.77	1388.05	1257.83	1499.02	1083.88	1243.15	1256.53	1577.02	1439.3	1757.51	1704.96	1502.61	1511.75	1480.09	1505.87	1401.44	1553.2	1173.96	1605.42	1366.51	1435.05	1664.16	1608.68	1621.08	1750.98	1806.14	1725.52
2900092D14Rik	1000	371.7	467.441	503.696	458.993	435.41	387.54	405.491	319.254	355.861	413.235	439.282	404.787	559.662	488.208	483.281	470.961	374.868	414.643	415.699	454.417	332.629	392.819	407.251	423.442	533.615	461.105	487.504	558.254	527.983	469.905
Pantr2	1000	229.935	175.705	240.781	177.874	186.551	136.659	158.351	143.167	147.505	206.074	216.92	154.013	193.059	182.213	175.705	167.028	112.798	145.336	138.829	138.829	117.137	119.306	136.659	177.874	203.905	104.121	173.536	188.72	151.844	114.967
Dalir	1000	72.1839	68.046	81.3793	79.5402	85.977	53.3333	112.644	98.8506	55.1724	62.069	68.5057	51.954	76.7816	80	61.6092	75.4023	81.8391	74.9425	78.1609	76.7816	64.3678	86.4368	76.7816	82.7586	94.7126	55.1724	73.1034	80	84.5977	87.8161
Mrps9	1000	1041.58	1056.38	1227.63	1201.55	1028.19	978.154	828.753	747.005	956.307	941.508	1033.83	977.449	1255.11	1083.16	1084.57	1057.79	1011.28	1188.87	1006.34	1003.52	842.142	1082.45	1068.36	1069.06	1183.23	894.292	986.61	1050.04	1079.63	1082.45
Gpr45	1000	116.58	132.642	146.632	138.083	122.798	105.44	111.917	108.549	116.321	107.513	111.399	120.207	141.192	138.342	134.715	131.606	124.093	122.28	109.585	120.725	100	133.42	118.394	131.606	112.953	69.6891	81.8653	86.5285	93.5233	107.772
Tgfbrap1	1000	588.299	601.3	664.861	634.706	575.117	546.768	570.603	528.711	555.074	527.808	518.057	552.727	668.653	624.233	554.352	561.394	503.611	625.135	549.476	561.033	519.682	618.996	563.561	602.925	728.422	537.92	530.697	528.53	574.937	588.299
AI597479	1000	527.625	557.709	577.379	544.692	517.79	498.409	509.401	439.977	511.137	492.913	527.914	527.914	609.488	569.569	504.484	624.241	590.686	629.158	565.809	628.29	501.012	695.111	604.86	610.067	739.659	533.7	591.264	597.339	627.712	609.488
Fhl2	1000	911.747	969.589	1077.52	1053.07	1064.4	915.921	1121.05	1059.63	923.077	922.481	855.695	774.001	1174.12	1067.98	945.14	298.748	290.4	331.544	556.351	293.381	561.717	322.6	296.959	528.921	753.131	347.048	402.504	256.41	276.088	905.784
Nck2	1000	919.64	813.333	991.351	929.73	828.468	831.712	588.829	531.532	765.405	700.18	783.063	828.829	1026.31	838.919	793.153	399.279	386.306	458.018	521.441	402.883	460.901	492.613	448.649	553.514	540.18	385.225	390.27	396.757	403.964	577.658
1500015O10Rik	1000	105.856	75.4505	77.7027	105.856	92.3423	1778.15	99.0991	85.5856	69.8198	104.73	46.1712	226.351	55.1802	126.126	65.3153	152.027	191.441	6370.5	234.234	202.703	143.018	130.631	3121.62	4681.31	399.775	3960.59	243.243	206.081	377.252	52.9279
Uxs1	1000	1240.7	1122.72	1227.24	1287.41	1193.19	1132.22	1200.32	1072.05	1089.47	1003.96	1247.03	1218.53	1445.76	1305.62	1178.15	1318.29	1184.48	1488.52	1267.62	1270.78	1106.89	1343.63	1391.13	1411.72	1454.47	1393.51	1441.81	1370.55	1368.96	1391.92
Tpp2	1000	751.129	623.36	748.763	770.703	664.014	592.385	550.441	508.712	653.904	541.622	609.809	631.534	782.964	667.67	593.031	752.42	673.263	765.971	664.659	709.185	562.917	815.229	745.967	705.098	757.797	570.445	633.47	616.692	620.779	656.7
Mettl21c	1000	1.84162	3.68324	7.36648	3.68324	4.60405	2.76243	0	0	0.92081	3.68324	4.60405	2.76243	3.68324	0.92081	1.84162	0.92081	2.76243	0.92081	0	3.68324	2.76243	0	2.76243	0	1.84162	1.84162	0	0	2.76243	1.84162
Tex30	1000	105.138	104.348	109.881	110.672	91.6996	95.6522	109.091	105.929	98.0237	95.6522	139.13	115.415	120.949	105.929	106.719	110.672	111.462	135.968	110.672	105.138	103.557	109.881	129.644	149.407	148.617	92.4901	120.158	107.51	103.557	128.854
Kdelc1	1000	213.855	237.952	244.406	249.57	221.601	203.528	197.074	164.372	198.365	206.971	232.788	223.322	247.418	205.68	203.098	268.503	283.133	289.157	248.709	246.988	237.522	309.811	292.169	326.162	345.525	206.11	250.43	237.522	256.454	227.625
Bivm	1000	352.842	365.444	380.846	392.047	345.001	297.676	291.515	273.873	314.758	324.559	350.602	339.681	385.046	353.962	331.84	384.206	359.563	403.248	352.562	373.285	315.318	381.126	378.045	381.126	420.05	319.518	332.96	297.676	321.199	316.158
Ercc5	1000	324.688	341.147	362.095	366.085	348.13	304.489	306.234	265.586	286.284	291.272	326.185	307.731	353.865	324.938	297.007	402.494	402.244	460.1	392.269	430.923	324.688	413.217	424.19	443.142	468.828	354.863	374.813	394.015	378.803	360.848
Mettl21e	1000	0	0	0.314367	0	0	0	0.628733	0.9431	0.314367	0	0	0	0.314367	0.628733	0	0	0	0	0	0	0	0	0	0	0.314367	0	0	0	0	0
Gulp1	1000	56.7876	56.1156	56.7876	59.8118	42.3387	81.9892	57.4597	53.7634	46.371	49.3952	51.7473	53.0914	50.7392	56.7876	42.3387	207.997	240.255	357.191	146.169	219.422	113.239	213.374	255.376	290.659	196.237	223.118	149.53	181.452	171.371	113.575
4930521E06Rik	1000	0	0	0	0	0	0	0	0	0	0	0	0	0	0	0	0	0	0	0	0	0	0	0	1.10375	0	0	0	0	0	0
Col3a1	1000	9.88497	12.5809	24.6226	34.3278	7.18907	21.7469	27.8577	26.7793	8.26743	12.4012	8.62689	7.72825	18.8713	11.5025	7.3688	7.3688	6.64989	9.34579	7.18907	5.93098	9.16607	10.4242	13.4795	12.2214	10.4242	13.1201	10.7836	6.11071	7.54853	12.5809
Col5a2	1000	75.2834	78.7604	71.6553	72.7135	90.8541	86.9237	64.5503	55.0265	77.8534	82.6909	81.4815	79.6674	83.9002	83.5979	55.7823	24.4898	42.9327	59.5616	38.0952	37.9441	34.6183	43.3862	41.7234	62.585	54.8753	35.5253	52.7589	40.2116	48.2237	37.6417
Wdr75	1000	563.17	539.051	585.758	553.599	540.965	490.812	434.533	418.836	543.262	476.263	545.559	482.389	622.894	529.862	494.64	576.57	541.348	591.501	556.279	573.507	447.933	630.934	574.655	596.861	659.265	479.326	547.09	591.884	569.296	552.067
Slc40a1	1000	132.544	127.219	161.538	137.278	121.598	125.74	126.923	111.538	151.775	128.698	110.651	116.568	165.089	142.899	107.396	99.7041	86.3905	103.846	77.2189	98.2249	96.1538	93.4911	92.8994	90.2367	160.651	102.071	134.024	91.1243	117.16	135.799
Stk-ps2	1000	0	0.287109	0	0.287109	0	0	0	0	0	0	0	0.287109	0	0	0	0	0	0	0	0	0	0	0	0	0	0	0	0	0	0.287109
Dnah7b	1000	25.3288	26.303	26.8712	29.0632	22.3251	32.4728	17.5353	19.646	23.8675	22.731	23.7863	25.9782	27.8454	22.4874	22.0815	19.3213	30.768	51.307	20.7826	29.6314	16.4799	39.9415	35.8013	46.9232	36.2072	35.8013	28.4949	27.0336	31.0927	21.3509
Slc39a10	1000	1464.62	1326.95	1383.39	1502.72	1307.8	1235.44	2479.34	2318.08	1439.23	1119.33	1313.04	1264.87	1500.91	1478.13	1086.68	1588.59	1416.45	1536.59	1789.96	1540.01	1626.69	1484.18	1488.81	1730.5	1819.39	1425.12	1739.37	1421.89	1401.13	2203.18
Mir6350	1000	0	0	0	0	0	0	0	0	0	0	0	0	0	0	0	0	0	0	0	0	0	0	0	0	0	0	0	0	0	0
Tmeff2	1000	1132.37	1017.97	1027.25	996.406	1055.11	923.031	844.864	819.108	940.701	957.472	992.812	1099.13	1147.65	1113.21	946.691	920.635	748.128	877.508	770.291	872.117	834.681	981.432	833.783	826.295	1191.37	893.082	917.041	953.579	947.29	938.604
9330175M20Rik	1000	6.26959	4.70219	5.48589	8.62069	6.26959	5.87774	11.7555	7.05329	1.17555	4.70219	5.09404	4.31034	6.26959	2.3511	5.87774	6.26959	1.17555	3.9185	3.1348	1.5674	3.52665	3.52665	1.95925	3.52665	1.95925	3.1348	3.1348	3.9185	1.5674	4.31034
Sdpr	1000	121.113	134.534	151.227	137.152	110.311	144.354	173.159	142.062	107.038	126.678	117.84	116.53	140.753	127.66	90.0164	122.422	119.476	259.247	133.879	136.825	137.152	149.264	184.288	220.622	220.949	232.079	161.375	145.99	180.033	179.378
Nabp1	1000	282.946	252.29	217.054	243.481	255.109	261.452	140.944	128.964	216.702	203.312	208.245	192.741	243.481	219.168	193.094	119.45	121.917	147.992	119.803	119.45	123.326	125.44	114.165	157.153	159.267	119.098	125.44	114.87	120.155	153.277
Myo1b	1000	137.938	128.241	167.821	163.269	117.356	129.23	345.537	340.788	140.906	143.479	111.023	101.722	146.843	120.127	95.191	988.72	915.892	969.721	757.174	958.441	585.989	934.494	965.367	823.867	763.507	784.484	926.38	982.387	978.033	710.469
Stat4	1000	1.5868	9.20343	2.22152	2.22152	3.49096	2.53888	35.8616	29.1971	2.53888	6.66455	3.80831	1.5868	2.85624	2.22152	2.53888	7.93399	12.6944	15.5506	14.5985	10.1555	12.377	14.9159	7.61663	15.5506	14.2812	7.61663	9.83815	10.7902	8.56871	11.4249
Stat1	1000	278.006	249.066	278.94	276.886	251.494	237.677	199.029	181.852	230.583	264.937	225.355	245.706	238.798	234.317	227.409	249.813	218.447	300.784	223.861	253.361	224.981	269.978	251.68	274.832	317.588	198.096	219.94	169.716	221.994	208.178
Gls	1000	2745.69	2495.53	2762.92	2761.85	2562.58	2345.93	2440.9	2345.13	2479.5	2309.74	2448.78	2465.21	2814.21	2510.08	2173.9	1463.74	1381.59	1565.38	1714.04	1462	1624.42	1708.7	1384	1759.05	2167.36	1369.57	1519.3	1263.26	1327.63	2017.36
Nab1	1000	257.272	340.212	317.61	300.511	297.17	273.192	276.533	268.671	269.458	282.626	292.256	313.09	305.818	334.709	269.064	250.393	228.774	334.709	288.719	265.527	312.107	343.16	265.33	301.101	384.827	347.288	274.961	283.019	295.008	324.686
Tmem194b	1000	116.087	127.283	138.48	130.819	118.444	106.364	112.846	108.427	98.409	116.382	107.248	86.9181	117.56	131.703	99.5875	59.8114	56.8651	81.0253	72.4808	74.8379	99.8821	81.0253	55.9811	87.2127	134.944	70.713	69.8291	66.8827	75.4272	88.6859
Mfsd6	1000	1055.99	1168.16	1122.18	1118.6	1106.98	923.792	991.234	961.896	997.853	1032.56	955.098	1010.73	1146.51	1145.26	990.161	887.835	761.181	911.449	921.467	862.254	918.068	1039.53	852.236	945.617	1222.9	757.961	776.744	657.066	709.123	940.608
Inpp1	1000	506.764	458.286	535.513	511.838	468.433	487.599	429.538	421.646	440.812	448.703	441.375	476.888	499.436	480.271	422.21	478.016	483.653	550.733	452.649	490.417	410.372	594.138	537.204	558.625	571.59	422.773	480.834	385.006	405.862	460.541
Hibch	1000	414.319	373.826	448.357	427.817	336.854	375	320.423	259.39	360.915	340.962	381.455	389.671	430.751	406.69	339.789	394.366	437.793	499.413	402.582	438.967	354.46	458.333	408.451	485.915	525.235	431.338	362.089	401.408	388.498	382.629
1700019D03Rik	1000	166.667	191.847	152.278	211.031	169.065	152.278	229.017	185.851	142.686	139.089	98.3213	148.681	128.297	171.463	97.1223	171.463	143.885	177.458	224.221	169.065	223.022	287.77	152.278	217.026	255.396	134.293	154.676	94.7242	133.094	230.216
Mstn	1000	2.98285	8.57569	5.21999	13.05	5.59284	6.33855	1.86428	6.71141	8.20283	4.10142	2.60999	5.21999	5.59284	5.21999	5.21999	2.98285	3.3557	1.49142	1.86428	1.11857	2.60999	0.745712	0	0.372856	2.23714	1.11857	3.3557	2.23714	3.3557	3.72856
1700019A02Rik	1000	15.949	15.949	19.1388	11.1643	30.303	12.7592	14.3541	4.78469	15.949	15.949	7.97448	15.949	9.56938	17.5439	15.949	14.3541	20.7337	15.949	14.3541	7.97448	9.56938	9.56938	6.37959	14.3541	33.4928	9.56938	23.9234	12.7592	7.97448	22.3285
Pms1	1000	67.9868	70.6271	71.2871	76.8977	71.2871	55.4455	59.736	43.5644	73.5974	63.3663	58.7459	59.0759	71.2871	61.3861	58.7459	81.8482	82.8383	109.241	84.8185	89.769	55.1155	93.0693	95.0495	87.1287	85.8086	66.9967	75.9076	78.8779	75.9076	71.2871
Ormdl1	1000	196.641	188.516	232.394	193.933	187.432	197.183	195.558	187.432	192.308	182.015	174.431	205.309	184.724	196.1	167.931	270.314	261.105	360.238	239.978	286.566	228.602	299.567	293.608	285.482	328.277	218.852	236.728	203.142	218.31	249.729
Osgepl1	1000	262.455	263.996	285.568	282.486	256.292	218.798	281.972	243.965	235.234	239.856	259.373	209.04	263.482	267.078	238.829	319.979	264.51	348.228	320.493	314.33	301.489	360.555	352.851	328.711	404.725	286.595	312.275	302.003	363.636	325.629
Asnsd1	1000	307.944	330.876	346.028	343.161	321.867	314.906	311.22	275.594	314.496	308.354	349.713	308.354	356.675	352.17	273.546	391.073	347.666	454.955	370.598	403.767	332.514	428.337	414.414	458.64	475.839	362.817	386.159	366.503	376.74	415.233
Dnah7a	1000	3.82986	2.93351	3.82986	2.52608	4.48175	4.07432	3.74837	3.42243	3.82986	5.3781	2.28162	3.66688	3.50391	3.5854	3.17797	3.17797	7.00782	3.50391	6.02999	6.11147	5.05215	7.00782	5.86701	8.14863	7.7412	3.99283	6.60039	6.35593	6.60039	3.74837
Stk17b	1000	67.1141	93.6547	97.3154	75.3508	77.7913	77.1812	156.803	129.652	79.6217	94.8749	88.7736	77.1812	79.6217	94.2648	63.7584	131.483	123.246	151.922	138.804	141.855	131.788	137.584	169.005	150.092	192.8	129.042	144.6	120.5	165.04	159.854
Hecw2	1000	146.55	163.755	159.785	177.078	140.286	111.611	293.1	258.602	155.55	162.52	143.903	143.992	145.139	183.783	141.433	356.273	303.688	322.569	332.186	321.952	277.837	352.391	317.628	333.333	420.858	351.597	379.654	369.243	394.918	379.654
Mir7681	1000	0	0	0	0	0	0	0	0	0	0	0	0	0	0	0	0	0	0	0	0	0	0	0	0	0	0	0	0	0	0
Ccdc150	1000	2.88941	4.72813	5.25348	5.51615	3.15209	1.0507	3.41476	2.10139	4.99081	4.20278	3.94011	4.72813	3.41476	3.15209	1.83872	2.36407	5.51615	3.94011	6.30418	9.98161	2.36407	8.14289	4.99081	7.35487	7.88022	4.72813	8.93092	7.0922	10.7696	4.72813
Gtf3c3	1000	461.231	389.684	438.935	461.564	418.968	337.438	354.077	342.762	418.968	346.755	347.754	362.729	462.562	437.604	346.755	516.473	487.188	503.161	437.937	492.845	359.734	550.083	465.225	482.196	539.434	376.705	425.291	393.677	413.644	420.632
Pgap1	1000	141.223	122.318	133.283	146.8	126.382	114.945	183.382	173.74	128.84	133.566	120.522	122.223	123.169	135.173	94.0543	283.581	277.153	261.367	244.541	277.531	209.755	292.939	249.835	253.238	299.461	232.82	274.506	265.432	262.029	237.641
Ankrd44	1000	79.9674	90.228	81.5961	86.1564	83.7134	64.658	101.303	100.326	83.3876	105.375	69.2182	97.2313	72.3127	87.2964	71.987	122.638	130.293	135.668	110.586	140.391	114.821	143.648	126.059	152.443	171.987	107.98	116.775	127.036	146.417	100
Sf3b1	1000	2646.91	2397.19	2837.83	2848.33	2447.26	2311.1	2136.65	1951.22	2379.26	2107.9	2548.05	2419.8	3126.64	2548.7	2347.76	3037.8	2784.36	3259.09	2913.58	2966.89	2310.45	3038.28	3038.12	3032.95	3475.69	2633.5	3086.42	3064.45	3078.99	2876.76
Coq10b	1000	376.803	427.005	428.736	365.84	346.797	406.809	544.143	484.709	347.374	365.84	396.422	328.332	409.694	421.235	387.19	597.807	616.272	713.214	478.938	631.275	547.605	634.16	666.474	617.426	687.248	628.967	658.973	624.351	633.583	766.878
Hspd1	1000	3196.83	3060.03	3408.66	3403.95	2963.98	2850.34	2562.18	2415.95	3116.64	2820.33	2793.31	2914.24	3328.9	3052.74	2664.24	3381.22	3192.11	3802.32	3177.53	3418.95	2852.92	3833.19	3424.96	3515.87	3769.73	3110.21	3067.32	3063.46	3024.44	3211.84
Hspe1	1000	2479.17	2601.56	2664.06	2813.8	2395.83	2509.11	2122.4	1854.17	2580.73	2480.47	2683.59	2494.79	2932.29	2626.3	2419.27	2964.84	2591.15	3061.2	2863.28	2851.56	2468.75	3217.45	2782.55	2959.64	3058.59	2648.44	2761.72	2653.65	2712.24	2852.86
Mob4	1000	1043.17	1133.76	1103.68	1175.87	1102.62	995.4	913.305	814.933	963.907	993.631	1015.22	1051.31	1212.31	1164.19	1012.38	1056.26	906.228	1115.71	957.891	987.615	981.599	1193.21	1031.85	1110.05	1185.77	881.812	952.583	854.919	932.767	1079.97
Rftn2	1000	441.513	504.897	477.693	456.474	428.999	402.612	378.672	338.955	406.148	415.397	428.999	399.075	509.793	430.087	375.952	545.43	477.149	514.69	504.081	581.61	470.62	605.55	516.05	524.755	636.289	450.49	514.418	521.763	609.086	489.391
2002-03-01	1000	196.738	192.575	200.555	191.881	182.165	157.529	147.814	133.588	162.734	142.956	164.469	174.879	208.189	187.023	170.368	224.15	214.781	221.374	195.35	202.984	181.818	217.904	189.799	214.087	263.012	187.37	192.922	214.087	214.087	221.721
Boll	1000	2.38474	0	3.97456	0.794913	0.794913	0	0	0	0	3.17965	0	0	1.58983	0.794913	0	0	0	3.97456	0	3.97456	0	0.794913	0	0	0	0	0	0	0.794913	0.794913
Plcl1	1000	391.609	392.525	398.017	380.625	358.047	325.553	256.751	236.766	334.249	367.658	409.611	487.262	420.9	564.455	367.201	419.832	339.893	516.705	376.506	428.986	410.526	461.632	388.711	461.48	713.196	518.383	437.529	397.407	422.731	481.922
9130227L01Rik	1000	1.04932	0	3.67261	1.57398	2.09864	1.04932	19.4124	12.0672	2.62329	2.09864	3.67261	0.524659	3.14795	2.62329	2.09864	0.524659	0	0.524659	2.09864	0	7.86988	0	0.524659	4.19727	4.19727	2.09864	0	0	0.524659	5.77125
1700003I22Rik	1000	0	0	0	0	0	0	0	0	0	0	0	0	0	0	0	0	0	0	0	0	0	0	0	0	0	0	0	0	0	0
Hsfy2	1000	0	0	0	0	0	0	0	0	0	0	0	0	0	0	0	0	0	0	0	0	0	0	0	0	0	0	0	0	0	0
Satb2	1000	126.182	209.421	175.369	195.611	182.936	143.208	746.5	735.906	143.965	264.472	165.153	101.589	171.396	169.694	154.938	17.5936	27.0526	43.7003	300.416	37.6466	342.792	29.7011	18.9179	227.961	386.114	128.263	150.019	14.1884	30.0795	433.977
9130024F11Rik	1000	65.1824	83.691	97.9077	107.296	91.2017	89.0558	364.539	293.187	76.4485	112.393	89.0558	48.015	109.442	85.8369	87.9828	4.29185	5.90129	16.3627	96.5665	5.09657	110.783	8.58369	1.87768	67.5966	148.873	39.1631	45.0644	1.60944	10.1931	190.451
BC055402	1000	16.3438	13.0145	17.5545	13.9225	13.0145	11.5012	4.84262	4.23729	14.5278	12.4092	11.8039	13.6199	20.8838	9.68523	10.5932	2.42131	6.05327	4.53995	4.53995	4.23729	7.86925	7.86925	3.3293	6.96126	9.0799	7.26392	5.44794	5.14528	9.0799	5.14528
4930558J18Rik	1000	0	1.46199	0.974659	0.487329	0.974659	0	0.487329	0.487329	0.487329	0	1.46199	0.487329	0	0.487329	0.487329	0.487329	1.94932	1.46199	0.974659	1.94932	3.41131	0.974659	0.974659	1.46199	2.92398	0.487329	0.487329	0.974659	0	0.974659
1700066M21Rik	1000	452.611	517.127	483.871	476.887	448.287	392.418	509.81	436.648	449.95	416.694	495.843	471.899	571.334	542.401	472.897	455.604	367.808	457.931	447.622	459.927	431.659	527.769	469.238	447.622	573.329	390.09	430.662	470.569	428.334	524.776
Tyw5	1000	320.584	299.026	300.417	333.102	282.337	260.083	291.377	241.307	319.193	279.555	326.147	324.757	396.384	340.751	295.549	304.59	278.164	311.544	312.239	311.544	321.28	360.223	278.86	308.762	419.332	296.245	331.015	285.118	320.584	347.01
9430016H08Rik	1000	360.755	355.472	421.887	401.509	385.66	356.226	332.83	284.528	347.17	305.66	338.868	316.981	439.245	392.453	365.283	409.057	370.566	470.189	387.17	391.698	329.057	494.34	456.604	440	449.057	325.283	360.755	347.925	384.906	353.962
Spats2l	1000	167.614	215.822	194.067	200	205.933	185.661	252.905	246.972	183.684	157.973	156.737	196.786	205.439	227.194	166.378	291.965	258.591	329.048	258.344	289.988	205.686	330.037	329.295	296.663	246.972	260.816	242.522	261.063	258.344	229.666
Kctd18	1000	222.1	235.638	259.422	230.15	223.198	213.319	198.317	190.999	198.683	231.248	242.225	211.489	266.008	261.983	203.074	263.447	231.98	291.621	244.42	275.521	212.953	272.228	246.25	282.839	324.186	241.127	260.52	301.866	269.667	249.177
Sgol2a	1000	9.41654	8.49335	8.86263	8.49335	10.709	7.20089	11.6322	10.709	7.38552	10.1551	8.30871	8.49335	8.12408	8.30871	5.90842	19.7563	23.6337	22.1566	22.5258	23.449	19.0177	26.034	19.5716	24.003	24.7415	9.97046	13.6632	21.2334	16.6174	13.1093
Aox1	1000	96.5313	108.398	120.037	96.7595	92.1953	135.783	70.5157	68.6901	82.6107	86.4902	89.4569	98.5851	146.737	92.6518	101.552	85.8056	80.1004	219.078	75.7645	84.6645	69.8311	80.3286	123.003	187.357	115.016	159.744	90.1415	95.3902	115.472	78.7312
Aox3	1000	20.6422	25.2294	68.8073	46.789	24.3119	37.6147	30.2752	33.0275	73.8532	28.8991	14.9083	21.789	92.8899	19.4954	75.6881	14.2202	21.5596	31.8807	11.9266	13.5321	13.3028	16.7431	15.8257	24.0826	16.2844	19.4954	18.578	14.4495	18.8073	18.578
Aox4	1000	4.02253	7.24055	7.24055	7.24055	4.42478	8.4473	6.83829	6.23492	4.62591	7.6428	5.63154	5.63154	6.03379	4.82703	3.21802	2.41352	6.23492	3.8214	6.23492	6.23492	8.24618	12.2687	3.62027	9.45294	6.03379	3.21802	5.43041	3.21802	2.21239	7.24055
Aox2	1000	0	0	0	0	0	0	0	0	0	0	0	0	0	0	0.628141	0	0	0	0	0	0	0	0	0.20938	0.20938	0	0	0	0.20938	0
Bzw1	1000	2480.06	2510.41	2579.6	2638.55	2387.22	2127.43	2571.48	2382.63	2322.98	2190.26	2256.27	2296.51	2736.32	2701.73	2239.68	2729.62	2338.16	2845.39	2612.78	2650.55	2474.76	3002.12	2736.32	2789.27	3324.04	2596.54	2526.65	2427.11	2457.47	3070.6
Clk1	1000	1894.43	2390.87	2300.52	2045.34	1866.26	1887.31	1707.58	1438.47	1861.72	1826.75	2368.2	2095.53	2473.12	2136.33	1948.83	2547.6	2889.9	2970.85	2162.56	2721.18	2179.08	2655.44	2600.06	2696.89	3247.09	2829.02	3085.82	2800.52	3137.95	2725.71
Ppil3	1000	302.799	347.583	351.145	305.344	330.28	272.265	284.478	270.738	294.656	248.855	302.799	281.934	333.842	293.13	264.122	295.165	299.746	341.476	332.316	308.397	268.193	353.181	323.664	366.412	349.618	271.247	301.272	292.621	276.845	310.941
Nif3l1	1000	399.335	407.882	406.933	451.092	393.637	373.219	350.902	295.821	367.996	336.657	332.384	364.672	415.954	389.839	351.377	465.337	374.644	460.114	415.48	406.933	394.587	522.317	455.84	460.114	488.604	327.16	307.692	336.657	339.981	390.313
Orc2	1000	406.347	426.004	453.243	443.696	376.299	356.08	379.949	354.114	362.258	355.518	395.956	383.319	456.613	427.689	376.018	380.511	383.881	427.97	348.778	363.662	324.347	454.928	400.168	422.353	460.545	336.984	342.039	371.806	367.032	365.628
Fam126b	1000	746.981	639.793	777.113	783.094	628.982	618.976	622.312	563.082	662.335	549.626	681.541	696.722	849.569	732.835	647.269	733.065	770.443	733.295	669.695	750.086	594.94	912.248	662.565	697.642	835.193	575.733	665.095	604.945	649.339	706.843
Ndufb3	1000	3535.71	3515.04	4122.18	4103.38	3642.86	3330.83	3706.77	2917.29	3407.89	3593.98	3868.42	3281.95	4411.65	3830.83	3546.99	4015.04	3441.73	4347.74	3637.22	3968.05	3460.53	4552.63	3806.39	3988.72	4513.16	3642.86	3845.86	3838.35	3719.92	4118.42
Gm20257	1000	108.974	104.701	164.53	142.094	136.752	99.359	82.265	79.0598	87.6068	103.632	82.265	113.248	144.231	108.974	127.137	76.9231	67.3077	73.7179	69.4444	85.4701	56.6239	70.5128	72.6496	89.7436	56.6239	42.735	56.6239	60.8974	81.1966	45.9402
Als2cr12	1000	6.34518	1.90355	1.90355	1.90355	1.90355	0.634518	0.634518	1.26904	0.634518	1.90355	0	2.53807	0.634518	1.26904	0.634518	6.34518	13.9594	5.71066	6.34518	7.61421	9.51777	10.7868	7.61421	12.0558	12.0558	0.634518	8.24873	9.51777	8.24873	6.34518
Cflar	1000	156.609	154.454	172.414	164.033	147.989	174.09	114.104	104.047	141.403	128.113	126.317	149.306	159.483	152.059	114.224	134.459	130.148	273.587	136.135	153.137	130.987	133.501	184.148	229.167	174.928	197.917	129.909	113.625	122.126	136.494
Casp8	1000	39.7511	38.7141	45.973	42.5164	30.4183	34.5662	40.7881	39.7511	35.9488	33.1835	26.616	36.2945	51.8493	34.2205	30.4183	38.3685	31.4552	72.589	32.4922	41.1338	35.9488	35.2575	49.084	66.3671	49.4297	75.7	44.2447	42.8621	45.973	31.4552
Trak2	1000	2083.81	2587.82	2416.99	2344.87	2270.83	1894.23	1646.15	1495.03	1985.9	1981.25	1757.05	1910.74	2054.33	2149.36	1723.72	2748.88	2047.76	2592.31	2214.74	2561.06	2296.96	2804.49	2584.94	2320.67	3061.06	2508.49	2067.95	2278.53	2469.39	2182.85
Stradb	1000	634.441	646.526	707.38	654.294	587.397	572.723	744.497	650.41	626.241	617.609	610.272	591.282	733.707	616.746	586.534	640.052	632.715	728.097	612.43	668.968	604.661	771.688	689.253	710.833	812.689	544.67	604.661	611.998	564.523	713.423
Als2cr11	1000	0.469263	0.469263	1.87705	0	1.40779	0	0.469263	0.938527	0.938527	0	0	0	0.469263	0.469263	1.40779	2.34632	0.938527	0	0	0	0	0	0	0	0.938527	0	0.469263	0.469263	0.938527	0
Tmem237	1000	547.667	519.27	575.558	586.714	516.734	702.84	453.854	448.783	502.028	451.318	468.56	451.826	531.947	518.763	443.712	486.308	479.716	1380.32	510.142	495.943	490.872	532.961	1002.03	1209.94	629.817	937.627	424.442	401.116	394.523	438.134
Mpp4	1000	13.9294	11.9857	14.2533	18.7885	11.0139	25.2672	11.0139	11.0139	12.9576	17.4927	20.4082	15.2251	22.9997	16.197	15.2251	3.56333	4.21121	12.3097	4.21121	3.56333	2.91545	4.85909	6.80272	9.71817	7.4506	21.056	8.09848	5.18303	5.50696	6.80272
Als2	1000	488.753	425.256	518.223	530.325	418.565	416.572	284.311	257.83	423.975	364.749	389.522	451.167	500.712	447.893	387.101	307.802	282.318	331.862	295.131	291.287	258.685	326.452	290.433	331.293	348.092	267.796	280.182	256.122	273.206	309.937
Cdk15	1000	3.38524	22.3426	15.5721	9.47867	14.218	18.2803	10.8328	9.47867	11.5098	7.44753	18.9573	16.2492	11.5098	7.44753	14.8951	11.5098	4.73934	13.541	7.44753	9.47867	9.47867	14.8951	14.218	13.541	11.5098	7.44753	9.47867	10.1557	13.541	9.47867
Fzd7	1000	92.5348	100.021	84.8409	91.2872	72.3643	132.668	72.3643	62.7989	85.4648	102.516	81.7218	127.053	92.3269	105.011	74.4438	85.8806	95.2381	258.89	87.1283	90.6633	77.7708	95.2381	154.502	202.953	119.36	223.123	105.427	100.645	117.072	94.6143
Gm973	1000	105.146	100.974	94.0195	87.0654	83.7274	256.745	76.217	63.4214	95.4103	106.537	95.9666	118.776	116.829	91.7942	79.5549	149.652	230.042	190.821	166.62	218.359	257.58	188.595	145.758	201.947	224.757	121.836	200	216.134	221.14	150.487
Sumo1	1000	2353.09	2378.6	2418.93	2471.6	2307.82	3184.36	2234.57	1990.95	2067.49	2169.55	2176.13	2149.79	2615.64	2330.04	2204.94	2454.32	2163.79	2617.28	2457.61	2462.55	3291.36	2755.56	2453.5	2563.79	2976.95	1995.06	2322.63	2211.52	2238.68	2581.89
Nop58	1000	646.255	600.709	688.765	693.826	629.049	592.611	488.36	461.538	604.757	506.579	574.393	570.344	737.854	593.623	509.615	630.061	643.219	747.976	556.174	672.065	510.628	742.409	662.955	687.247	680.162	587.551	611.842	638.664	621.457	555.668
Snord70	1000	18.8679	18.8679	18.8679	18.8679	18.8679	37.7358	37.7358	37.7358	94.3396	56.6038	18.8679	94.3396	37.7358	75.4717	37.7358	0	113.208	37.7358	18.8679	37.7358	56.6038	56.6038	18.8679	0	18.8679	94.3396	18.8679	113.208	56.6038	0
Snord11	1000	0	15.873	0	0	0	15.873	0	0	0	0	0	0	0	0	15.873	0	15.873	31.746	15.873	15.873	0	15.873	0	15.873	0	15.873	0	0	63.4921	0
Bmpr2	1000	1067.65	1005.32	1110.31	1170.56	1005.95	875.8	837.557	799.675	950.483	851.808	842.067	901.867	1097.32	1007.67	803.914	1099.22	1092.36	1113.83	990.169	1100.12	880.491	1111.66	1025.8	1068.28	1237.67	821.322	891.946	843.24	902.138	950.663
Fam117b	1000	760.21	716.48	810.264	804.662	702.205	660.643	651.97	594.326	713.589	675.641	649.801	707.264	840.622	709.794	658.836	841.706	799.602	861.583	781.713	841.706	681.605	868.63	800.687	829.78	932.237	624.684	749.91	700.759	741.778	754.969
Ica1l	1000	538.63	508.493	526.575	592.877	487.397	450.959	477.26	447.123	458.356	451.781	465.753	492.603	561.644	481.096	458.356	590.959	544.384	575.342	555.068	603.562	467.671	603.014	544.658	556.986	586.027	493.699	584.11	563.014	562.74	564.11
Wdr12	1000	430.095	411.434	450.533	457.346	377.073	375.296	374.408	381.517	403.14	359.005	394.55	407.583	457.642	419.135	364.633	407.583	382.109	403.732	411.434	393.069	383.886	456.457	405.806	449.645	469.491	330.865	385.071	345.083	342.121	412.618
Carf	1000	237.692	209.708	248.402	250.648	227.155	179.824	172.914	155.467	190.188	192.434	193.125	189.325	235.101	227.673	192.434	237.519	239.765	271.549	194.161	251.166	195.371	242.011	220.764	236.656	289.86	187.597	229.228	248.92	252.375	223.873
Nbeal1	1000	74.1658	60.8688	79.4516	72.514	60.6211	60.9514	72.4315	50.4625	67.7238	47.737	53.9313	57.4001	78.2953	61.6947	51.4536	116.369	148.084	129.914	96.1348	134.374	92.0879	118.599	97.6214	116.122	134.044	101.008	95.0611	99.521	124.876	92.0879
Cyp20a1	1000	311.126	385.077	315.123	311.126	311.126	254.497	264.49	243.171	316.456	295.803	258.494	331.779	323.784	325.117	287.142	348.434	261.159	363.757	293.138	340.44	334.444	332.445	323.784	345.103	495.67	322.452	306.462	317.788	347.102	355.763
Abi2	1000	1864.25	1803.48	2046.37	1915.13	1795.45	1598.43	1588.05	1614.33	1632.41	1475.9	1744.73	1769.84	2273.52	1916.81	1795.95	1955.64	1829.93	1957.98	1820.22	1871.44	1580.52	1880.98	1916.64	1911.45	2139.94	1803.65	2096.08	2044.19	2015.4	2050.55
Raph1	1000	333.333	330.811	364.813	346.276	331.359	298.234	475.266	451.574	322.694	307.009	275.42	278.381	346.276	329.056	265.658	176.703	181.968	176.593	228.255	171.548	217.725	230.778	165.734	242.624	306.241	162.115	208.402	151.366	167.928	259.296
Cd28	1000	1.6215	0.694927	0.926569	0.694927	0.463285	0.926569	3.70628	6.25434	1.15821	0.231642	0.231642	1.15821	0.463285	0.694927	1.85314	0.463285	1.15821	3.01135	1.85314	0.463285	0.926569	1.6215	0.231642	3.70628	2.31642	1.38985	2.08478	1.38985	0.694927	3.93792
Ctla4	1000	0	2.06932	1.55199	2.58665	2.58665	2.06932	2.58665	0.517331	1.03466	0.517331	1.03466	1.03466	1.55199	1.55199	1.03466	0	0	1.55199	0	0	0.517331	0	1.03466	2.06932	2.06932	0.517331	0.517331	0	0.517331	1.55199
Icos	1000	3.37942	3.0722	7.06605	3.0722	3.37942	3.0722	2.76498	3.37942	2.15054	1.84332	4.30108	6.45161	3.68664	4.60829	4.91551	0.614439	1.22888	3.37942	0.30722	0	1.22888	0.614439	2.45776	1.5361	1.5361	1.5361	0.614439	1.5361	0.30722	1.22888
9530026F06Rik	1000	0	0	0	0	0	0	0	0	0	0	0	0	0	0	0	0	0	0	0	1.12108	0	0	1.12108	0	0	0	0	0	0	0
Pard3b	1000	24.428	25.7388	30.9819	32.1735	23.2364	26.4538	17.5167	15.6101	26.8112	20.1382	18.7083	26.2154	26.5729	26.4538	21.9256	19.8999	24.5472	43.9704	20.6149	20.6149	17.5167	27.4071	31.816	42.5405	28.5987	33.2459	28.5987	23.7131	30.1478	25.7388
Nrp2	1000	593.081	367.028	523.393	520.069	410.613	474.76	143.684	140.975	420.217	320.857	311.746	435.976	459.739	362.472	308.791	52.0808	48.264	53.1889	47.5252	54.297	91.3568	93.2036	41.6154	83.1076	68.0867	57.2519	68.7023	53.4351	50.9727	73.0116
4930487H11Rik	1000	0	1.11732	1.11732	0	0	0	0	0	2.23464	1.11732	0	0	0	0	1.11732	0	0	0	0	0	0	0	0	0	0	0	0	1.11732	0	0
Ino80d	1000	200.828	194.028	228.768	235.79	190.258	179.171	168.453	143.543	172.001	161.579	190.997	196.245	224.407	210.585	171.04	245.177	255.303	249.908	205.632	241.703	187.819	240.151	219.676	233.055	266.391	206.445	223.15	230.32	250.277	188.854
Ino80dos	1000	136.515	109.878	137.625	132.075	114.872	84.9057	96.5594	100.444	89.3452	79.9112	124.306	96.5594	155.383	102.109	107.658	110.433	104.883	119.312	117.647	110.988	84.9057	123.196	103.774	90.455	146.504	85.4606	102.109	119.312	104.883	91.5649
Ndufs1	1000	2199.52	2137.34	2398.02	2402.12	2184.83	2032.11	1981.21	1797.06	2126.75	1900.58	2086.09	1979.84	2377.86	2282.88	1992.48	2755.38	2409.29	3022.55	2585.24	2755.04	2188.93	3142.13	2838.06	2826.79	2796.38	2321.15	2399.04	2418.86	2439.36	2525.11
Eef1b2	1000	2440.77	2845.84	2906.36	2711.33	2573.2	2370.93	2381.79	2068.8	2519.4	2449.56	2677.19	2485.77	2867.56	2728.92	2406.1	3205.38	2871.7	3656.49	3131.92	3352.82	2779.1	3668.91	3297.98	3413.35	3841.18	2918.26	3207.97	3279.36	3367.3	3198.14
Snora41	1000	203.54	115.044	123.894	132.743	123.894	97.3451	79.646	132.743	61.9469	150.442	132.743	115.044	159.292	88.4956	150.442	159.292	44.2478	61.9469	79.646	97.3451	61.9469	123.894	115.044	176.991	97.3451	61.9469	106.195	61.9469	115.044	115.044
Gpr1	1000	23.3593	17.2414	16.6852	13.9043	16.6852	25.0278	20.0222	20.0222	11.6796	17.2414	12.792	12.792	16.6852	14.4605	15.0167	18.3537	18.3537	27.2525	17.7976	18.3537	17.2414	11.1235	14.4605	26.1402	23.9155	10.5673	20.0222	15.0167	11.1235	23.3593
Zdbf2	1000	77.925	86.6088	82.8001	73.3547	73.2785	70.2316	80.1341	89.1987	73.7355	72.2121	64.7471	57.8154	54.159	65.0518	44.3327	223.263	258.912	212.371	145.338	209.476	115.935	205.286	177.102	195.993	167.809	133.912	169.714	164.839	159.43	118.906
Adam23	1000	984.732	1099.32	1112.55	1066.6	1034.46	894.867	1104.84	940.236	943.144	974.117	956.667	881.925	1134.51	1095.97	966.991	1832.34	1607.1	1700.16	1615.53	1736.51	1479.28	2004.8	1821.87	1699.87	1821.43	1567.11	1742.04	1820.56	1780.43	1669.33
Dytn	1000	2.47219	3.70828	1.64813	1.64813	4.12031	2.47219	1.23609	1.23609	2.06016	3.29625	1.23609	4.94438	1.23609	1.23609	1.64813	0.824063	7.00453	4.94438	3.29625	7.41656	0.412031	7.00453	4.53234	10.3008	5.35641	1.64813	3.70828	9.06469	2.47219	2.47219
Mdh1b	1000	30.3916	26.8849	21.6248	20.4559	25.716	20.4559	13.4424	12.858	16.9492	21.0403	16.3647	36.2361	15.1958	32.1449	18.1181	38.5739	72.4722	50.263	36.2361	50.263	23.3781	47.3407	43.2496	61.3676	55.5231	42.6651	48.5096	63.7054	51.4319	30.3916
Fastkd2	1000	276.131	269.579	288.612	284.555	273.323	248.05	217.473	223.713	236.817	243.37	263.651	258.346	290.172	281.747	255.85	302.964	281.123	307.02	275.819	303.588	260.53	345.398	297.66	314.821	369.735	248.986	259.282	244.306	273.011	263.027
4933402D24Rik	1000	0.569476	2.2779	2.84738	2.2779	1.13895	1.70843	6.26424	6.83371	3.41686	1.70843	1.70843	0.569476	0.569476	2.2779	1.70843	2.2779	0.569476	5.69476	2.2779	3.98633	0.569476	1.70843	0.569476	2.2779	3.41686	2.84738	1.13895	3.41686	1.70843	2.2779
Gm13749	1000	6.28492	8.37989	4.88827	4.88827	7.68156	7.68156	20.9497	29.3296	6.98324	6.28492	3.49162	0	4.18994	4.18994	0.698324	0.698324	0	1.39665	0.698324	1.39665	3.49162	0	0.698324	4.88827	6.28492	2.09497	0	0	0	11.1732
Mir1958	1000	0	0	0	28.5714	0	57.1429	0	0	0	0	0	0	0	0	0	0	0	0	0	0	0	57.1429	0	0	0	0	0	57.1429	0	0
Klf7	1000	294.91	247.006	334.581	303.144	268.713	274.701	228.293	266.467	241.018	219.311	187.126	224.551	275.449	297.156	203.593	383.234	351.796	369.012	317.365	340.569	275.449	400.449	298.653	336.078	420.659	304.641	290.419	243.263	312.126	297.904
Mir6899	1000	0	0	0	0	0	0	0	0	0	0	0	0	0	0	0	62.5	0	0	0	0	0	0	0	0	0	0	0	0	0	0
Creb1	1000	349.127	367.771	394.49	412.065	322.527	332.265	337.846	293.789	339.033	317.183	342.24	347.227	419.19	380.002	324.783	413.609	416.221	440.565	366.94	401.496	354.59	452.559	418.003	436.646	508.966	336.777	370.384	347.94	374.659	386.177
Mettl21a	1000	154.164	140.285	165.791	162.416	149.287	158.665	157.539	135.034	147.412	170.293	158.29	162.041	187.547	159.79	160.915	256.189	210.428	275.319	206.677	214.179	197.299	256.189	236.309	259.19	280.945	220.18	227.307	235.184	252.063	231.058
2810408I11Rik	1000	8.41515	7.01262	11.2202	12.6227	1.40252	9.81767	19.6353	15.4278	5.6101	7.01262	14.0252	9.81767	16.8303	15.4278	11.2202	36.4656	26.648	33.6606	19.6353	32.2581	22.4404	32.2581	30.8555	36.4656	36.4656	26.648	21.0379	35.0631	22.4404	14.0252
Ccnyl1	1000	167.179	211.282	190.427	191.453	170.94	177.778	242.051	219.145	158.974	181.197	169.915	166.496	203.419	202.051	176.068	416.41	394.188	422.906	319.316	389.06	314.872	394.188	386.667	394.53	416.41	411.624	422.564	449.573	468.034	388.376
Fzd5	1000	12.5832	13.8849	18.6578	19.8149	14.7527	19.381	15.1866	16.9222	14.3188	17.0668	9.97975	13.3063	11.7154	15.6205	16.0544	83.4539	105.438	94.4461	57.709	90.8302	35.4353	79.2595	73.7634	85.3341	70.0029	62.1927	90.107	97.9173	95.0246	59.5892
Plekhm3	1000	317.566	324.34	354.24	343.962	306.237	295.609	314.88	298.295	294.674	277.038	259.285	284.279	343.378	313.128	276.571	452.815	447.092	484.933	420.696	450.362	372.46	516.468	460.173	450.946	494.043	336.604	406.914	403.761	445.106	373.16
Akr1cl	1000	0	0	0	0	0	0	0	0	0	0	0	0	0	0	0	0	0	0	0	0	0	0	0	0	0	0	0	0	0	0
Cryge	1000	1.55763	0	0	0	0	0	0	0	0	0	0	0	0	0	1.55763	0	1.55763	0	0	0	0	0	0	0	0	0	0	0	0	0
Crygd	1000	0	0	0	0	0	0	0	0	0	0	0	0	0	0	0	0	0	0	0	0	0	0	0	0	0	0	0	0	0	0
Crygc	1000	0	0	0	0	0	0	0	0	0	0	0	0	0	0	0	0	0	0	0	0	0	0	0	0	0	0	0	0	0	0
Crygb	1000	0	1.57978	0	0	0	0	0	0	0	0	0	0	0	0	0	0	0	0	0	0	0	0	0	0	0	0	0	0	0	0
Cryga	1000	26.0163	16.2602	17.8862	24.3902	34.1463	19.5122	17.8862	14.6341	14.6341	24.3902	29.2683	16.2602	29.2683	9.7561	16.2602	9.7561	1.62602	11.3821	6.50407	4.87805	8.13008	17.8862	8.13008	9.7561	4.87805	0	1.62602	3.25203	0	4.87805
D630023F18Rik	1000	115.111	96.7379	98.6127	105.362	106.862	92.6134	55.868	67.1166	109.111	118.11	93.3633	81.7398	96.7379	94.8631	87.739	27.3716	22.1222	30.3712	36.7454	30.3712	38.6202	37.1204	20.6224	36.3705	39.3701	13.4983	13.8733	17.6228	19.8725	34.4957
Idh1	1000	701.395	716.161	811.321	635.767	648.072	663.249	726.415	672.683	827.317	706.317	657.096	674.323	830.189	722.724	638.638	697.703	698.113	1208.37	754.717	794.504	691.14	846.185	882.691	1049.22	951.189	874.897	716.571	716.161	736.669	757.588
Pikfyve	1000	292.936	271.968	306.619	314.083	271.346	254.109	264.682	249.223	261.04	232.519	243.003	241.404	299.422	277.832	237.05	339.049	321.013	436.961	323.323	330.964	265.837	352.821	376.81	379.12	379.12	301.022	306.086	291.159	290.982	290.626
Pth2r	1000	2.07125	3.314	3.72825	3.314	3.72825	4.55675	23.6123	34.3828	7.04225	12.8418	3.314	2.89975	3.72825	4.55675	1.24275	6.628	4.1425	8.285	12.0133	7.4565	16.9843	4.1425	1.24275	12.4275	18.6413	5.38525	15.3273	4.971	1.24275	12.8418
Crygf	1000	0	0	0	0	0	0	0	0	0	0	0	0	0	0	0	0	0	0	0	0	0	0	0	0	0	0	0	0	0	0
Map2	1000	8378.99	7678.8	8265.04	8703.44	7512.68	7394.02	7666.12	6775.36	7565.94	7072.46	7508.7	7450.36	9273.01	7693.12	6612.86	7748.37	7234.24	7480.07	7889.13	7648.73	6992.75	7354.89	7202.36	7767.57	9692.57	5902.54	6910.51	6282.43	6381.16	8127.36
Unc80	1000	1552.94	1269.05	1569.79	1651.52	1370.65	1377.96	1397.69	1181.11	1355.28	1112.61	1355.94	1354.1	1851.03	1388.53	1248.65	1351.36	1304.81	1343.16	1380.7	1285.08	1243.92	1553.61	1191.38	1325.28	1680.19	1150.45	1259.81	1163.82	1282.86	1451.19
Rpe	1000	501.141	473.004	512.167	532.7	434.601	464.259	344.106	314.829	457.034	423.194	441.065	468.821	558.935	487.072	436.122	571.863	507.605	629.278	544.867	592.776	480.608	553.612	578.327	619.392	592.015	511.407	571.483	546.388	557.034	560.837
Kansl1l	1000	192.857	184.664	219.328	227.941	159.874	161.765	133.824	113.866	182.353	153.992	207.143	223.319	256.933	216.597	201.261	179.832	165.966	208.193	161.134	187.395	158.403	189.916	162.185	192.017	206.303	159.874	176.471	214.076	227.521	165.966
Acadl	1000	721.766	830.595	927.105	786.961	726.386	757.187	827.515	593.943	800.821	785.421	734.086	761.807	898.357	790.041	697.125	1042.09	903.491	1501.03	943.018	1091.89	863.963	1080.08	1182.24	1338.81	1311.09	1226.9	982.546	1042.61	1069.82	1003.08
Myl1	1000	27.027	18.018	32.4324	24.3243	25.2252	20.7207	15.3153	19.8198	13.5135	12.6126	40.5405	30.6306	54.0541	26.1261	35.1351	1.8018	2.7027	6.30631	3.6036	3.6036	9.00901	5.40541	3.6036	12.6126	8.10811	7.20721	12.6126	4.5045	7.20721	15.3153
Lancl1	1000	1807.67	1685.27	1856.53	1846	1692.22	1525.44	1722.71	1552.57	1627.44	1502.13	1735.26	1628.78	2056.49	1855.86	1692	1968.39	1865.28	2076.44	1973.32	1923.78	1697.6	2078.23	2034.52	1993.5	2140.55	1619.82	1812.15	1880.74	1872.23	2078.01
Cps1	1000	3.23625	40.8127	791.622	5.75333	28.0475	3.77562	7.19166	4.67458	568.141	80.187	10.2481	38.6552	247.573	23.1931	201.546	2.33729	7.91082	273.103	2.33729	12.046	2.33729	1.97771	0.719166	16.0014	45.3074	27.5081	6.65228	9.16936	16.361	17.6196
Erbb4	1000	141.649	128.259	139.3	155.743	149.401	120.272	177.825	158.093	137.891	95.1374	73.0561	109.467	150.106	159.032	95.1374	230.679	250.176	235.377	185.342	215.88	178.295	224.806	174.066	255.344	299.037	191.214	200.376	150.81	192.389	206.249
Ikzf2	1000	26.4303	33.1175	30.4639	29.084	27.9164	28.3409	21.123	16.5588	33.4359	29.827	26.4303	28.7655	31.4192	35.7711	23.989	28.0225	32.2683	35.7711	23.3521	31.7376	26.6426	31.313	24.4135	31.1007	42.3522	25.2627	26.218	22.3968	28.2348	24.9443
Spag16	1000	16.5576	13.4914	7.9722	8.58545	12.6738	35.5683	4.49714	2.6574	7.9722	11.6517	4.29272	24.3254	6.54129	14.3091	13.4914	17.5797	45.3802	104.456	25.9608	36.5904	18.8062	37.2036	66.2306	111.815	42.314	68.4791	38.4301	38.0213	42.5184	20.2371
Vwc2l	1000	39.7422	79.9141	48.3351	77.3362	43.609	42.5349	66.8099	59.9356	53.276	140.494	89.1515	41.0311	31.3641	56.2836	47.261	47.6907	39.957	37.8088	50.913	39.5274	53.276	89.1515	38.8829	45.1128	55.8539	36.7347	35.8754	34.3716	25.9936	59.7207
Bard1	1000	2.93686	7.5257	6.60793	4.03818	5.87372	2.56975	6.24082	3.85463	5.32305	7.8928	5.1395	5.32305	5.69016	5.50661	5.69016	5.69016	11.931	9.17768	4.22173	9.54479	7.8928	11.3803	7.8928	8.07636	11.7474	6.79148	8.44347	8.99413	7.8928	5.32305
Abca12	1000	0.360447	1.20149	1.20149	1.68209	0.720894	0.961192	0.480596	1.32164	2.16268	2.16268	1.32164	0.720894	0.841043	0.720894	1.44179	0	0.120149	0.240298	0.720894	0.240298	0.600745	0.120149	0.360447	0.360447	0.841043	0	0.480596	0	0	0.240298
Atic	1000	473.382	584.45	528.15	591.727	511.298	473.765	517.809	451.934	489.468	507.085	481.425	460.36	534.661	541.938	474.531	567.982	513.213	604.366	521.639	573.727	475.68	635.006	562.237	603.217	699.732	544.236	497.128	537.342	558.024	538.874
Fn1	1000	163.442	282.611	381.602	260.653	216.38	225.519	296.499	221.365	297.448	282.018	193.709	192.641	272.76	276.795	216.736	91.1573	80.5935	139.822	84.0356	90.6825	92.3442	107.893	101.721	119.407	202.255	163.442	153.591	94.9555	127.478	150.148
Apol7d	1000	4.19111	0.838223	0.838223	2.51467	2.51467	1.67645	0.838223	0	5.02934	3.35289	0	0	0	1.67645	0.838223	0.838223	0.838223	0.838223	0.838223	0	0	0.838223	0	0	0.838223	0	1.67645	0	0.838223	1.67645
Gm8883	1000	0	1.96271	10.7949	0	0	0	0	0	18.6457	2.94406	0	0	10.7949	0	4.90677	0	0	6.86948	0	0	0	0	0	0	0.981354	0	0	0	0	0
4933417E11Rik	1000	0	1.82983	0	0.914913	0	0	1.82983	0.914913	0	0	1.82983	0.914913	0	0.914913	0	0.914913	0	0.914913	0.914913	0	0	0.914913	0	0	1.82983	0	0	0	0.914913	1.82983
Mreg	1000	84.2359	78.219	102.688	84.2359	69.3943	75.4112	117.529	88.6482	83.0325	97.4729	84.637	60.9707	83.4336	81.0269	71.801	40.5134	23.2651	39.3101	60.1685	34.4966	87.4448	110.309	33.6943	47.7337	85.0381	52.9483	32.0899	25.6719	32.491	62.5752
Pecr	1000	213.502	221.941	405.063	214.346	210.127	169.62	140.928	148.523	297.046	210.127	189.873	175.527	351.899	184.81	264.135	188.186	172.152	292.827	172.152	201.688	173.84	206.751	214.346	247.257	269.198	195.781	166.245	195.781	199.156	216.878
Tmem169	1000	285.968	302.309	315.098	355.595	341.385	237.655	278.863	253.641	269.272	247.957	262.167	256.128	280.995	272.114	247.602	239.076	205.684	237.655	242.984	224.867	220.249	318.65	227.709	255.062	274.245	195.027	219.538	188.632	217.052	246.536
Xrcc5	1000	280.908	338.419	341.549	330.595	312.989	310.642	381.064	329.812	323.944	311.033	276.604	246.479	295.775	276.213	273.865	495.696	458.92	660.407	467.527	538.732	427.621	591.941	540.297	580.203	539.906	421.753	376.369	409.233	426.839	424.883
March4	1000	331.502	323.382	350.37	345.594	309.529	314.545	239.79	245.283	299.976	254.359	262.001	327.92	373.059	331.741	287.079	512.061	514.688	531.646	431.813	494.387	344.877	503.941	531.168	505.374	421.065	472.653	521.615	540.244	543.587	462.384
Smarcal1	1000	545.048	538.496	583.321	616.977	554.579	521.519	500.223	502.904	525.838	467.61	499.926	540.432	642.889	578.555	514.371	773.194	697.99	807.148	662.547	708.116	564.706	793.745	728.071	748.622	760.089	675.354	695.905	661.057	701.862	653.165
Ankar	1000	0	0	0.218675	0	0	0	0	0	0	0	0	0	0	0.656024	0	0	0	0	0.218675	0	0	0	0	0	0	0	0	0	0	0
Rpl37a	1000	3948.98	4323.13	5882.65	5688.78	4501.7	4496.6	6205.78	3697.28	4544.22	4899.66	5501.7	5445.58	6027.21	5363.95	4870.75	5554.42	6454.08	7792.52	6801.02	6324.83	5195.58	8304.42	6037.41	7231.29	6413.27	6362.24	5840.14	6273.81	7828.23	6988.1
Igfbp2	1000	663.904	637.528	1136.4	1003.77	546.345	1990.2	1021.85	819.141	782.969	658.628	474.002	664.657	882.442	534.288	480.03	308.214	259.985	6532.78	493.595	311.228	403.165	440.09	3596.08	5626.98	584.778	4966.84	322.532	207.234	467.219	501.13
Igfbp5	1000	1832.93	1727.54	1929.62	1816.02	1360.1	1590.19	1615.31	1171.85	1388.45	1355.48	1800.82	1977.45	2373.08	2018.28	1762.38	1208.23	1353.6	1493.34	1611.04	1458.49	1993	1637.85	1213.87	1739.84	2644.69	1667.92	1915.78	2268.19	2284.93	1974.72
Tnp1	1000	0	0	2.34742	0	0	0	0	0	0	0	0	2.34742	0	0	0	0	0	0	0	0	0	0	0	0	0	0	0	0	0	0
1700027A15Rik	1000	0	5.25394	0	0	0	0	0	0	0	0	0	0	0	0	0	0	1.75131	0	0	1.75131	1.75131	0	0	1.75131	5.25394	0	0	1.75131	0	0
Pinc	1000	0	0	0	0	0	0	0	0	0	0	0	0	0	0	0	0	0	0	1.92308	0	0	0	0.641026	0	0	0	0	0	0	0
D530049I02Rik	1000	0	0	0	0	0	0	0	0	0	1.81488	0	0	0	0	0	0	0	0	0	0	0	0	0	0	0	0	0	0	0	0
6030407O03Rik	1000	8.32871	9.99445	13.8812	12.7707	14.9917	5.55247	7.77346	7.77346	7.21821	12.7707	4.99722	10.5497	9.4392	8.88395	6.10772	23.3204	14.9917	19.9889	18.3232	21.6546	9.99445	23.3204	22.2099	13.8812	18.8784	9.4392	13.8812	13.3259	9.99445	11.1049
Mir6351	1000	0	10.101	0	0	0	0	10.101	0	0	0	0	20.202	0	0	0	0	0	0	0	10.101	0	0	60.6061	0	0	0	0	20.202	0	0
Tns1	1000	165.429	251.806	208.367	210.373	185.193	247.592	246.99	210.273	175.762	192.717	162.52	174.057	177.368	219.703	146.77	284.711	243.078	581.16	224.92	270.265	226.023	285.915	405.799	522.372	355.036	609.751	368.078	310.694	388.744	338.283
Rufy4	1000	0	0.428082	0.856164	2.99658	0.428082	3.85274	1.28425	2.14041	1.71233	0.428082	0.856164	2.14041	2.56849	0.428082	0	3.85274	0.856164	13.2705	1.28425	1.28425	2.14041	3.42466	4.7089	10.274	0.428082	4.28082	0	1.71233	2.14041	0.428082
Cxcr2	1000	0	0	0	0	0.328623	0.328623	0	0.657246	0	0.657246	0	0.328623	0.657246	0	0.328623	0	0	0	0	0	1.64312	0	0.985869	0.985869	0.657246	0	0.657246	0	0	0
Cxcr1	1000	0	1.77936	0	3.55872	0	0.88968	0	0	0	0	0	0.88968	0	0	0	0	1.77936	0.88968	0	0.88968	0.88968	1.77936	2.66904	0	0	0.88968	0.88968	0.88968	1.77936	0
Mir1928	1000	0	0	0	0	0	0	0	0	0	0	0	0	0	0	0	0	0	0	0	0	0	0	0	0	0	0	0	0	0	0
Arpc2	1000	7172.2	6596.74	7862.87	7592.99	6994.99	6473.39	4299.31	3751.41	6390.73	5453.35	8003.13	7834.06	10227.9	8742.02	8539.76	5904.82	5085.16	6112.71	5496.56	5607.39	4566.69	6086.41	6010.02	5865.37	5768.94	5393.86	5606.14	5957.42	5780.84	5728.24
Gpbar1	1000	0	1.0101	0	0	0	0	0	0	0	0	0	0	0	2.0202	0	0	0	0	0	0	0	0	0	1.0101	1.0101	0	0	0	0	0
Aamp	1000	3274.18	3624.73	3662.09	3661.54	3446.7	3328.02	3209.89	2851.1	3289.56	3290.66	3310.99	3298.35	3740.66	3712.64	3174.73	3832.42	3592.86	4336.26	3687.36	3889.01	3442.31	4640.11	4034.62	4339.56	4318.68	3463.19	3478.02	3573.08	3710.99	3757.14
Pnkd	1000	2220.57	2987.43	2730.86	2676.57	2658.57	2319.71	2446.86	1927.43	2289.14	2612.86	2605.71	2480.29	3257.14	3188	2940.86	2296.86	1900.29	2246	2234.29	2179.71	2306.57	2743.43	2331.14	2392.57	2702.86	1907.71	1861.71	1798.86	1987.43	2562.57
Tmbim1	1000	537.895	932.005	572.109	584.669	673.019	577.306	739.281	570.377	592.031	776.094	632.741	731.485	647.033	1001.73	721.958	1103.51	877.003	1174.53	993.071	1160.68	1110	1315.72	1112.17	1125.6	1644.87	1271.11	1070.59	1301.43	1486.79	1170.2
Catip	1000	42.3608	51.8801	37.6011	32.3655	54.2599	79.01	49.0243	38.5531	43.7887	47.5964	30.4617	70.9186	46.1685	53.3079	37.6011	40.9329	77.1061	148.025	55.6878	66.6349	32.3655	63.3032	80.9139	135.65	91.861	81.8658	72.8225	75.2023	74.7263	65.207
Slc11a1	1000	48.6111	48.6111	61.6319	54.2535	51.6493	42.1007	49.9132	42.5347	46.0069	55.9896	31.684	41.2326	39.4965	51.6493	29.5139	65.1042	63.3681	59.4618	56.8576	64.6701	54.6875	65.9722	58.5938	55.9896	87.2396	49.9132	59.4618	46.441	61.1979	46.0069
Ctdsp1	1000	482.349	593.3	588.256	535.303	474.063	474.424	536.383	400.216	455.692	518.372	474.784	509.726	572.406	582.133	447.767	615.634	585.014	810.519	554.035	663.545	573.487	711.095	721.182	803.314	819.885	768.732	597.983	705.331	777.017	639.049
Mir26b	1000	0	11.7647	0	0	0	11.7647	0	0	0	11.7647	23.5294	11.7647	23.5294	11.7647	47.0588	11.7647	0	0	0	11.7647	0	58.8235	0	0	11.7647	0	0	11.7647	0	23.5294
Vil1	1000	7.05807	6.73725	8.34135	7.69971	8.02053	4.81232	8.02053	9.62464	7.05807	5.13314	5.77478	4.17068	11.5496	4.81232	3.52903	6.0956	6.41643	10.2663	7.37889	10.9079	8.983	11.8704	12.8329	4.17068	9.94546	10.9079	16.6827	8.02053	11.5496	7.37889
Usp37	1000	181.49	185.242	203.585	188.438	168.566	161.479	175.375	154.391	183.157	166.342	181.351	187.743	213.035	188.299	166.898	208.866	211.089	230.128	211.645	215.675	168.149	243.469	219.983	235.964	240.411	179.405	222.207	205.253	234.575	209.005
Rqcd1	1000	407.226	442.437	465.707	432.945	402.939	402.939	415.799	357.012	373.852	374.158	402.633	401.102	454.072	462.952	367.728	409.063	406.614	482.241	389.161	401.715	372.015	457.746	416.105	457.746	484.691	384.874	438.763	432.945	429.271	443.968
Plcd4	1000	248.318	264.338	255.687	276.194	224.928	243.832	190.324	173.342	216.918	255.367	264.979	260.814	313.361	254.726	230.695	232.938	223.967	222.044	226.85	257.93	223.005	314.643	225.248	249.92	316.245	229.093	271.067	268.183	317.847	223.646
Zfp142	1000	290.685	301.927	327.088	290.685	260.573	269.138	252.409	243.978	261.376	250.803	292.693	302.73	363.49	311.296	287.072	306.344	307.147	340.07	265.658	287.607	264.722	318.389	284.529	322.002	338.33	300.321	314.641	318.121	327.891	285.6
Bcs1l	1000	399.79	442.399	501.315	439.769	422.409	430.3	360.863	339.821	410.31	410.31	419.253	424.513	459.758	445.555	415.045	450.289	422.935	527.091	446.607	413.993	364.019	446.081	426.092	510.258	559.179	401.894	477.117	460.81	481.326	471.331
Rnf25	1000	1182.56	1376.61	1286	1298.17	1231.91	1148.75	1214.33	1136.58	1111.56	1227.18	1290.06	1248.82	1329.95	1294.12	1154.83	1091.28	943.881	1195.4	963.489	1022.31	942.529	1129.82	1077.08	1185.94	1321.16	920.892	1025.69	1002.03	1064.23	987.153
Stk36	1000	46.2361	48.3378	44.5166	49.6752	45.0898	53.1143	42.7971	48.5288	42.415	46.8093	43.7524	41.4597	34.5816	49.8663	34.7726	67.6347	79.4803	117.692	65.9152	70.3095	53.4964	74.8949	75.6592	104.509	87.6958	72.6022	54.8338	62.6672	61.9029	50.2484
Ttll4	1000	162.238	134.258	189.984	175.406	134.728	150.717	115.918	108.159	151.893	125.323	156.595	156.36	198.683	166.471	155.185	175.17	185.751	230.661	146.955	175.641	123.677	190.924	181.049	209.734	209.264	173.289	188.808	173.76	202.916	155.89
Cyp27a1	1000	123.81	272.487	404.762	168.783	195.238	115.344	201.058	167.196	314.815	280.952	173.016	215.344	271.958	228.571	271.429	369.312	301.587	478.307	295.238	382.54	359.788	476.72	371.429	362.434	510.582	351.852	278.307	339.153	372.487	304.762
Prkag3	1000	0.353107	0.706215	2.11864	1.76554	1.76554	0.706215	0.353107	0	1.41243	0.706215	0.706215	1.41243	0.353107	3.17797	2.11864	1.41243	1.76554	0.706215	0.353107	0.353107	1.05932	1.05932	1.41243	0.706215	0.706215	1.05932	1.05932	1.05932	3.53107	1.41243
Wnt6	1000	1.93424	0.967118	14.0232	16.441	0.967118	14.0232	58.0271	30.9478	1.45068	9.18762	8.70406	3.86847	2.41779	4.83559	2.41779	2.41779	1.93424	2.90135	7.25338	3.38491	12.5725	1.93424	3.86847	4.35203	9.18762	5.80271	0.967118	3.86847	4.83559	16.441
Wnt10a	1000	81.0811	89.7501	88.2203	105.558	86.1805	84.1407	360.02	216.216	82.6109	107.088	114.227	84.1407	83.1209	89.2402	78.0214	27.537	18.358	24.9873	114.227	34.6762	95.3595	38.7557	26.5171	79.5512	109.638	55.0739	31.6165	26.0071	26.0071	193.779
Cdk5r2	1000	3669.75	4090.98	4703.03	4427.88	4042.9	3752.22	6820.64	5423.45	3597.26	3854.29	4031.8	3598.74	5129.07	4219.67	3879.81	4962.65	4457.47	4835.43	5332.84	4726.7	4776.63	5241.86	4937.87	5447.12	5673.08	5572.12	5218.57	5151.26	5808.43	6827.29
Fev	1000	2.0284	2.0284	5.40906	1.35227	1.35227	0.676133	2.70453	0	3.38066	5.40906	0	2.70453	2.70453	3.38066	0.676133	0	0	0	2.70453	0	3.38066	0.676133	0	0.676133	0	0	0	0	0.676133	1.35227
Cryba2	1000	5.55556	11.1111	11.1111	12.5	16.6667	9.72222	9.72222	22.2222	8.33333	12.5	20.8333	15.2778	18.0556	11.1111	16.6667	1.38889	2.77778	0	6.94444	2.77778	9.72222	1.38889	0	0	9.72222	0	0	0	0	13.8889
Mir375	1000	0	0	0	0	0	0	0	0	0	0	0	0	0	0	0	0	0	0	0	0	0	0	0	0	0	0	0	0	0	0
Ccdc108	1000	79.2235	72.5778	58.412	56.4883	74.3267	131.34	84.4701	94.0888	68.0308	102.483	57.8874	146.73	48.9682	83.4208	55.2641	45.4704	152.676	246.765	69.7796	101.784	63.134	104.932	134.138	302.029	148.304	157.398	107.73	106.331	130.115	64.5331
Ihh	1000	3.27332	4.09165	6.54664	6.54664	2.04583	2.04583	2.04583	4.90998	2.45499	4.90998	7.36498	5.72831	4.09165	3.68249	7.36498	4.90998	3.68249	5.72831	11.0475	4.09165	10.2291	9.4108	7.36498	8.59247	4.90998	6.95581	5.31915	6.13748	10.6383	10.6383
Nhej1	1000	85.1064	113.475	78.0142	89.8345	70.922	73.2861	91.0165	62.6478	88.6525	56.7376	75.6501	89.8345	66.1939	74.4681	91.0165	153.664	133.57	131.206	124.113	92.1986	154.846	122.931	151.3	170.213	128.842	130.024	144.208	167.849	158.392	131.206
Slc23a3	1000	3.88727	0.485909	2.91545	4.85909	0.971817	3.40136	13.6054	8.74636	0.485909	4.37318	4.37318	9.71817	9.23226	1.45773	4.85909	4.37318	1.45773	2.42954	0.971817	3.88727	1.94363	3.40136	0.971817	4.37318	6.31681	9.23226	2.91545	6.31681	7.77454	7.28863
Cnppd1	1000	463.112	558.802	578.524	509.861	476.26	484.66	533.601	437.546	467.86	500.365	515.705	530.679	594.96	581.081	497.078	675.676	608.839	798.758	582.542	610.299	561.724	696.129	673.85	724.982	747.991	749.087	715.121	767.348	749.817	677.867
Fam134a	1000	3175.26	3079.97	3515.7	3350.52	2970.85	2942.08	3439.09	3045.59	2932.74	2904.33	2996.26	3238.04	3871.45	3547.83	3180.87	3513.45	3264.95	3746.26	3561.66	3401.35	3209.27	3932.74	3628.18	3760.46	3828.85	3356.88	3480.57	3339.31	3523.17	3858.37
Zfand2b	1000	617.398	603.541	712.086	672.055	583.526	574.288	558.891	466.513	543.495	535.797	734.411	677.444	949.962	732.871	745.958	438.029	391.07	472.671	481.909	454.965	414.165	501.925	413.395	501.155	528.099	458.045	423.403	453.426	494.226	523.48
Abcb6	1000	368.565	352.881	443.914	393.113	391.749	334.47	356.631	311.626	383.907	349.472	334.47	332.083	397.886	362.428	338.22	358.336	366.86	456.529	348.449	363.791	307.535	371.974	380.157	406.751	465.053	322.878	387.658	347.426	386.294	389.021
Atg9a	1000	1666.18	1685.42	1867.3	1794.5	1651.57	1591.92	1798.64	1634.04	1585.1	1609.93	1668.37	1639.64	2098.37	1853.66	1726.08	1868.52	1676.89	1905.28	1817.14	1712.93	1746.53	2056.49	1922.57	1945.22	2085.22	1840.76	1921.6	1782.32	1925.98	2000.49
Ankzf1	1000	493.115	540.656	576.066	541.311	485.574	452.459	491.803	433.443	474.426	529.18	570.492	521.639	629.508	549.18	523.279	394.754	434.098	540	431.475	395.082	380.656	436.066	397.705	524.262	601.639	443.934	493.443	488.197	568.197	496.721
Glb1l	1000	168.357	155.317	173.573	170.096	161.402	150.971	137.931	129.528	128.369	167.488	147.204	156.766	182.266	153.289	156.766	141.698	153.868	281.657	128.658	144.306	122.863	150.971	202.55	244.277	196.755	209.794	148.653	166.039	175.891	137.351
Stk16	1000	634.768	668.158	712.22	714.974	657.143	633.735	615.835	550.775	587.608	607.229	654.389	664.372	746.644	692.599	672.978	714.63	636.833	806.196	691.91	694.32	630.293	774.182	722.892	813.081	802.754	660.241	697.074	671.945	703.959	637.866
Tuba4a	1000	8802.24	8588.41	9408.18	8893.33	8549.93	7847.54	11577.2	9965.42	8382.85	8410.13	9617.63	8920.12	10867	10090.1	9002.92	7688.75	6425.23	7615.68	8556.26	6927.42	8222.6	8516.32	7515.83	8603.02	9306.87	8299.07	8357.53	7522.16	7782.27	11486.6
A630095N17Rik	1000	0	1.30378	0	0	0	0	2.60756	0	1.30378	0	0	0	0	0	1.30378	1.30378	0	0	2.60756	1.30378	0	1.30378	0	5.21512	2.60756	0	0	1.30378	0	5.21512
Dnajb2	1000	989.697	1549.8	1089.6	1137.68	1225.73	1000.62	1430.85	1165.47	1070.56	1372.78	1161.1	1236.03	1113.02	1486.42	1172.34	1752.42	1477.99	1912.58	1781.77	1862	1820.79	2033.09	1634.72	1871.06	2303.78	1698.41	1618.48	1787.39	1987.2	1753.04
Ptprn	1000	7241.87	7528.71	8164.64	7310.61	7593.21	6911.74	8921.36	8476.94	7114.85	6937.77	7130.41	7203.39	8746.82	8567.19	7207.64	8823.2	8692.79	9132.39	8627.16	8019.8	6908.06	9353.32	9005.66	9737.77	9528.43	7680.06	8330.98	7616.12	8175.67	8795.47
Resp18	1000	1302.82	1697.18	1361.97	1380.28	1515.49	1388.73	3207.04	2938.03	1574.65	1877.46	1497.18	1287.32	1214.08	1409.86	1184.51	1584.51	838.028	1046.48	1546.48	1036.62	1790.14	2125.35	1056.34	1726.76	1939.44	1325.35	1295.77	1329.58	1204.23	2225.35
Dnpep	1000	561.151	590.442	593.011	593.525	553.957	498.972	671.12	603.289	531.346	545.221	513.875	502.055	558.582	603.289	477.39	1012.85	968.654	1132.58	943.988	1002.57	771.84	1084.79	1079.65	1029.29	1031.35	1048.3	1133.09	1098.15	1098.66	1050.87
Des	1000	17.6183	19.9021	18.5971	22.5122	16.3132	21.5334	25.1223	28.0587	14.3556	13.7031	14.3556	13.3768	27.4062	11.093	6.52529	14.0294	14.3556	19.9021	9.1354	15.6607	9.1354	15.3344	17.6183	23.491	19.2496	25.7749	19.9021	21.8597	21.8597	21.8597
Gm15179	1000	5.91716	0	0	0	4.43787	2.95858	4.43787	0	0	4.43787	5.91716	1.47929	0	2.95858	0	1.47929	0	0	0	0	1.47929	1.47929	0	5.91716	1.47929	0	0	0	0	4.43787
Speg	1000	838.407	828.344	1030.02	911.95	830.105	845.702	779.455	675.723	738.868	776.101	812.662	843.27	1035.05	879.078	795.807	901.3	854.172	954.633	786.331	796.981	698.281	821.635	885.87	933.669	889.644	959.916	928.47	938.281	1027	914.885
Gmppa	1000	1362.57	1291.23	1460.73	1412.96	1270.94	1160.34	1096.86	1053.66	1174.74	1168.19	1257.85	1249.35	1602.09	1370.42	1337.7	839.66	878.272	1049.74	792.539	886.78	840.314	965.314	944.372	1105.37	1176.7	924.084	945.026	1009.82	1009.82	952.225
Asic4	1000	204.906	148.302	215.094	207.17	143.019	163.774	217.736	238.113	162.264	165.66	134.34	140.755	193.585	136.604	142.642	2262.26	2229.43	2351.7	1833.96	2124.91	1297.36	2138.11	2405.28	2084.53	1736.98	2145.28	2363.02	2327.92	2547.55	1722.64
Chpf	1000	1353.63	1365.38	1526.43	1445.75	1391.96	1319.94	1336.01	1119.01	1300.15	1288.41	1474.19	1481.61	1905.1	1677.9	1525.5	1340.96	1234.93	1409.58	1245.75	1229.98	1066.15	1527.36	1320.25	1371.25	1351.16	1249.46	1202.47	1146.52	1267.08	1361.98
Tmem198	1000	1094.74	990.389	1228.83	1105.72	1018.76	1088.79	1331.81	1086.04	962.014	949.657	1222.43	1262.24	1602.29	1351.03	1265.9	1014.19	983.524	999.085	980.778	905.263	872.311	1044.39	978.49	1120.37	1015.1	1025.17	1017.85	913.501	914.874	1198.17
Obsl1	1000	115.598	105.719	129.636	124.09	102.426	122.877	152.166	141.941	100.347	114.038	105.719	116.464	146.101	109.359	102.253	101.213	103.12	142.114	111.785	106.759	105.199	123.57	116.118	140.901	132.409	125.997	125.823	110.745	135.182	116.984
Inha	1000	548.189	577.58	697.881	674.641	565.277	545.455	943.267	861.928	550.923	654.135	686.261	591.251	717.703	515.379	516.746	702.666	801.094	879.699	673.274	647.3	637.047	743.677	653.452	894.053	848.941	744.361	928.913	844.839	872.864	724.539
Stk11ip	1000	339.39	358.681	406.909	368.551	343.428	348.362	483.401	455.361	334.679	363.167	336.249	343.203	394.796	390.983	351.952	388.739	386.496	469.942	425.079	398.161	406.46	423.957	405.563	495.289	544.415	379.542	402.423	381.113	409.825	428.219
Slc4a3	1000	1314.57	1410.94	1574.87	1576	1394.73	1283.49	2356.9	2078.59	1399.91	1598.51	1291.6	1255.8	1389.33	1347.67	1178.11	2475.79	2468.14	2817.38	2173.16	2442.02	1839.23	2785.18	2561.81	2514.52	2478.05	2089.39	2210.31	2273.36	2496.28	2158.52
Gm17751	1000	5.02742	7.76965	5.48446	7.76965	6.39854	4.57038	15.5393	9.14077	5.48446	8.68373	7.31261	2.74223	8.68373	5.9415	7.31261	0.457038	1.37112	0.457038	2.28519	1.37112	1.82815	1.82815	0.914077	4.11335	5.02742	0	0.914077	1.37112	0.914077	5.9415
Mir6343	1000	0	0	0	0	0	0	0	0	0	0	0	0	0	0	0	0	0	0	0	0	0	0	0	0	0	0	0	0	0	0
Epha4	1000	3891.43	3012.17	3917.51	3808.94	3433.94	3120.26	1614.25	1408.98	3047.57	2569.69	3472.03	3691.21	5104.61	3816.37	3774.81	2071.59	1976.14	2117.73	1875.16	2107.77	1433	2312.9	2151.55	1971.24	2021.33	1621.05	1922.09	1917.04	1937.58	1733.88
Mir6352	1000	43.1034	8.62069	25.8621	25.8621	0	25.8621	0	0	17.2414	8.62069	25.8621	25.8621	8.62069	0	25.8621	25.8621	0	0	0	0	8.62069	0	0	0	0	0	0	0	0	0
Pax3	1000	0.258532	0.258532	0.258532	0.517063	0	1.55119	0.517063	0	0	0.517063	1.29266	0.517063	0	0	0	0	0	1.55119	0	0	0	0.258532	0.258532	0.517063	1.29266	1.03413	0	0	0	0
Sgpp2	1000	100.3	121.811	88.044	151.576	101.801	124.312	304.652	235.368	99.7999	147.074	104.802	70.035	76.038	104.552	62.7814	475.488	373.437	472.236	394.447	411.206	464.982	617.059	484.492	442.221	489.745	488.994	405.703	399.45	447.474	416.208
Farsb	1000	998.425	1010.63	996.061	1000.39	1003.54	899.567	809.768	747.932	950.374	881.843	996.455	951.95	1077.98	1018.91	916.109	928.712	816.857	960.221	887.357	895.628	788.106	1087.44	921.623	991.335	1093.34	731.784	794.407	693.58	726.664	896.022
Mogat1	1000	4.14594	4.97512	5.80431	3.31675	3.31675	9.12106	0.829187	2.48756	2.48756	4.97512	9.12106	1.65837	3.31675	3.31675	5.80431	1.65837	0	19.0713	2.48756	4.14594	0	6.6335	6.6335	14.0962	6.6335	10.7794	3.31675	2.48756	5.80431	0
Acsl3	1000	1967.09	2032.91	2110.13	2234.18	1914.18	1541.01	1831.14	1541.77	1749.87	1819.49	2121.52	2025.32	2793.92	2428.1	2115.19	2605.57	2238.23	2535.7	2403.29	2512.91	1903.54	2710.13	2194.68	2312.41	3018.48	2223.8	2308.61	2591.9	2879.24	2556.96
Utp14b	1000	121.829	125.094	147.953	142.929	118.061	107.008	99.2213	74.6044	110.274	113.539	110.274	107.762	161.768	145.441	115.298	207.988	151.972	175.082	153.981	202.462	153.228	178.85	154.986	158.001	215.524	136.649	129.364	185.381	240.643	130.118
Kcne4	1000	8.52619	13.8043	21.5185	26.7966	9.74421	23.5485	16.6464	10.5562	12.5863	8.12018	15.4283	11.3683	14.6163	27.2026	15.4283	16.2404	17.8644	24.7665	14.6163	14.2103	12.1803	47.503	14.2103	18.2704	30.0447	19.0824	11.3683	11.3683	19.4884	21.1125
Scg2	1000	3577.06	3711.07	3868.81	3855.94	3645.88	3281.69	2692.15	2915.9	3338.83	2820.52	3629.78	3660.76	4557.75	4166.2	3776.66	9346.08	9570.22	8680.89	6883.7	8510.26	4691.35	8736.42	8221.73	8630.58	7388.73	5246.28	6892.56	5907.85	6385.11	6237.02
Ap1s3	1000	50.4172	36.1613	46.5925	44.1586	33.3797	43.1154	57.3713	49.7218	32.6843	40.6815	41.3769	38.943	30.9458	37.5522	27.121	47.6356	51.4604	68.8456	60.153	54.242	45.5494	57.0236	62.5869	53.8943	62.2392	32.3366	45.5494	39.2907	36.509	47.2879
Wdfy1	1000	235.045	226.347	242.257	255.409	223.377	212.558	219.983	201.739	203.649	214.68	213.831	209.376	260.289	233.347	208.316	228.681	206.619	259.016	202.376	214.68	184.132	249.682	221.468	247.348	261.773	222.104	237.166	249.045	245.227	206.619
Mrpl44	1000	578.652	598.315	592.697	639.045	588.483	538.624	561.798	520.365	565.309	534.41	600.421	558.989	676.966	678.371	580.758	719.803	622.893	726.826	635.534	701.545	606.742	790.028	692.416	797.753	774.579	689.607	662.219	683.287	639.045	765.449
Serpine2	1000	3166.91	3377.62	3411.19	3604.87	3092.94	3034.06	3107.06	2652.07	3114.84	3378.1	3363.02	3207.79	3985.89	3388.81	2996.59	7755.23	6597.57	7601.46	6531.39	7098.3	5289.05	8233.09	7404.87	6655.47	7724.57	6131.87	7255.47	7654.5	7570.8	6069.59
Fam124b	1000	2.79525	1.04822	1.74703	2.09644	2.44584	3.84347	3.14465	0.698812	1.39762	0.698812	1.74703	1.04822	0	0.698812	1.04822	1.74703	0.349406	1.39762	0.349406	2.44584	0.349406	1.39762	0.349406	1.39762	0.349406	1.74703	1.39762	1.04822	0	0.698812
Cul3	1000	2136.4	2008.32	2090.45	2165.34	2001.81	1798.84	1685.6	1676.92	1863.24	1678	1770.26	1911.72	2279.31	2013.02	1781.84	2214.91	2003.26	2392.55	2082.13	2160.27	1816.21	2517.73	2201.52	2289.8	2517.37	1965.99	2029.31	2016.28	1984.08	2098.05
1700016L21Rik	1000	0	0	0	0	0	0	0	0	0	2.53807	0	0	0	0	0	0	0	0	0	0	0	0	0	0	0	0	0	0	0	0
Dock10	1000	936.441	679.423	898.57	946.504	717.293	651.218	240.334	204.846	737.685	596.663	848.517	1082.36	1026.88	891.684	782.309	873.279	762.579	784.031	647.908	847.855	614.936	856.992	740.201	674.656	842.161	665.784	714.248	821.769	838.453	605.8
Nyap2	1000	64.8186	62.7803	68.2837	66.6531	66.6531	63.5956	101.712	96.8202	70.3221	52.181	39.7472	60.3343	70.3221	59.3151	48.7159	143.702	150.836	139.217	117.611	142.479	87.2401	143.09	133.51	113.534	129.026	92.1321	114.35	100.897	115.165	89.2784
Mir6344	1000	0	0	0	0	0	0	0	0	0	0	0	0	0	0	0	0	0	0	0	0	0	0	0	0	0	0	0	0	0	0
Irs1	1000	129.652	141.22	156.499	146.349	116.992	139.474	103.35	84.1427	131.507	122.995	130.634	137.946	136.746	137.291	108.916	62.5341	66.3538	85.8889	71.4831	62.8615	79.5591	87.6351	67.8817	90.036	101.386	88.2899	61.661	53.4759	64.9351	91.8913
Rhbdd1	1000	111.762	129.324	120.277	126.397	104.311	129.058	95.2634	80.3619	109.367	120.809	86.2161	100.585	123.204	127.994	97.3922	114.156	132.251	188.398	124.268	142.895	108.568	151.41	156.2	167.376	189.196	149.282	134.38	128.26	134.646	132.251
Col4a4	1000	7.55635	6.53176	4.48258	7.8125	4.09836	26.2551	4.8668	3.58607	4.73873	3.97029	3.20184	7.17213	6.27561	5.50717	4.35451	3.84221	8.06865	112.961	4.48258	5.3791	1.66496	3.84221	42.2643	86.0656	9.73361	69.0318	6.91598	3.84221	6.91598	4.48258
Col4a3	1000	4.18167	4.06551	3.13625	3.0201	2.55547	22.3022	4.29783	1.97468	2.43931	3.48473	2.78778	3.36857	2.67162	3.48473	2.78778	2.78778	1.85852	88.7443	2.32315	1.39389	2.78778	2.43931	32.1756	79.5679	6.38866	56.9172	4.87862	2.32315	3.94936	1.51005
Mff	1000	3954.96	4100.27	4251.47	4399.46	4003.22	3730.29	4339.95	3878.28	3892.76	3713.67	3968.9	3868.63	4476.68	4227.88	3747.99	4054.69	3591.96	4290.08	4193.57	4038.07	3890.08	4726.01	4218.23	4339.95	4802.68	3579.09	3640.21	3465.95	3566.76	4374.26
Tm4sf20	1000	0	0	0.665336	0	0	0	0	0	0	0	0	0	0	0	0	0	0	0	0	0	0	0.665336	0	0	0	0	0	0	0	0
Agfg1	1000	888.428	792.477	896.717	971.629	839.018	784.826	746.573	728.403	850.813	725.534	713.102	789.289	959.515	896.717	758.687	856.87	807.141	895.123	826.905	785.464	678.036	992.349	879.821	862.926	952.502	739.56	819.254	726.49	778.132	805.865
Slc19a3	1000	35.6422	34.9697	41.0222	44.3847	40.0134	32.616	51.7821	48.0834	40.3497	40.3497	39.6772	28.9173	53.7996	43.3759	15.8036	39.341	28.9173	37.996	32.9523	39.0047	41.3584	35.6422	39.0047	36.9872	47.4109	51.1096	47.7471	39.0047	45.0572	47.0746
Ccl20	1000	0	0	0	0	0	0	0	0	0	0	0	0	0	2.49377	0	1.24688	0	0	2.49377	0	0	0	2.49377	0	0	0	0	0	0	1.24688
Daw1	1000	23.9808	23.3813	10.7914	11.3909	18.5851	32.9736	10.1918	3.59712	23.3813	19.7842	8.99281	38.9688	13.1894	26.3789	14.3885	20.9832	79.7362	89.9281	26.3789	42.5659	20.3837	51.5588	36.5707	91.1271	34.7722	47.3621	43.765	73.1415	61.7506	19.7842
Sphkap	1000	3030.25	2362.56	3155.1	3201.01	2612.41	2446.71	1367.94	1384.06	2656.63	1965.29	2513.21	2633.45	3397.42	2732.03	2603.19	457.924	316.8	390.049	486.64	397.42	602.119	488.79	363.022	509.367	682.74	366.708	420.455	315.264	378.839	683.814
Pid1	1000	529.059	669.666	697.413	672.666	574.053	576.678	568.804	548.181	565.054	582.302	643.795	514.436	756.28	707.912	624.297	590.551	559.43	700.787	558.305	617.548	549.306	673.416	620.922	701.537	664.792	488.189	449.569	428.196	416.198	586.427
Mir6353	1000	0	0	0	0	0	0	17.6991	0	0	8.84956	0	0	0	0	0	0	0	0	0	0	0	0	0	0	0	0	0	0	0	26.5487
Dner	1000	1547.63	1826.27	1834.53	1994.49	1786.89	1523.13	1661.07	1580.67	1606.55	1773.68	1670.43	1460.08	1950.72	1829.3	1557.54	1109.58	779.46	930.617	1253.85	957.324	1386.01	1670.98	1029.46	1247.25	1392.62	1092.79	891.52	828.469	956.498	1552.31
Mir5126	1000	0	0	0	0	12.987	0	0	0	0	0	12.987	0	12.987	0	12.987	0	0	0	0	0	0	0	0	0	0	0	0	0	0	0
Trip12	1000	1148.36	1091.88	1193	1248.03	1076.93	1017.34	996.159	956.499	1022.74	972.28	953.488	1016.3	1211.07	1147.22	972.28	1285.51	1252.28	1494.6	1156.04	1290.91	980.793	1400.54	1324.85	1392.23	1432.83	1113.48	1136	1068	1144.31	1105.9
Fbxo36	1000	70	112.222	80	80	93.3333	115.556	111.111	71.1111	70	106.667	77.7778	118.889	80	80	87.7778	135.556	145.556	295.556	143.333	154.444	124.444	205.556	177.778	242.222	213.333	195.556	133.333	143.333	176.667	131.111
Slc16a14	1000	111.537	110.26	120.051	108.131	120.477	93.6569	88.1226	72.7969	104.725	116.645	90.2512	111.111	103.023	123.883	106.854	77.9055	72.3712	91.5283	73.6484	82.1626	75.7769	94.5083	74.9255	78.7569	96.2112	48.5313	43.4227	40.017	50.6599	80.0341
A530032D15Rik	1000	0	0.568182	0	0	0	0	0	0	0.568182	0.568182	0	0	0	0	0	0	0	0	0	0	0	0	0	0	0	0.568182	0	0	0	0
Gm7609	1000	0	0	1.8622	0	0	0	0	0	0.620732	0	0	0	0.620732	0	0	0	1.24146	0	0	0	0	0	0	0.620732	0	1.24146	0	0	0	0
C130026I21Rik	1000	0.507357	1.01471	0	1.52207	0	1.01471	2.02943	0.507357	0	1.52207	0	0.507357	0	0	1.52207	0	0.507357	1.01471	0.507357	0.507357	1.52207	0	2.02943	0	0.507357	1.52207	0	0	0	0.507357
Sp110	1000	29.934	40.0812	39.0665	35.515	27.9046	26.3825	31.9635	31.4561	23.8458	35.0076	27.9046	24.8605	32.4708	29.934	26.3825	34.5003	23.3384	27.9046	22.3237	25.8752	20.8016	20.8016	21.8163	21.8163	40.0812	24.8605	31.9635	27.9046	36.5297	28.412
Sp140	1000	14.0728	16.1424	16.5563	17.3841	10.7616	9.51987	13.245	14.4868	13.245	11.5894	13.6589	9.51987	9.93377	11.5894	9.51987	9.10596	9.51987	15.3146	12.0033	10.7616	11.1755	14.0728	11.5894	13.245	18.6258	13.6589	12.8311	17.3841	15.3146	15.7285
Sp100	1000	45.4124	70.899	60.241	76.4597	50.0463	43.0955	74.1427	58.3874	41.2419	51.4365	44.0222	50.9731	55.607	43.5589	34.7544	43.0955	35.2178	58.8508	37.5348	37.0714	40.7785	34.291	37.9981	42.6321	55.607	57.4606	48.6562	39.8517	43.5589	55.1437
A630001G21Rik	1000	24.2769	25.3099	26.8595	19.6281	22.2107	20.6612	21.1777	14.4628	16.0124	18.0785	23.7603	25.3099	27.8926	36.157	26.8595	30.4752	14.4628	18.0785	17.562	24.7934	17.0455	21.1777	17.562	17.0455	20.1446	18.595	17.0455	21.1777	18.595	16.0124
Mir8096	1000	0	0	0	0	0	0	0	0	0	0	0	0	0	0	0	0	0	0	0	0	0	0	0	0	0	0	0	0	0	0
9930111H07Rik	1000	0	1.21803	0	0	0	0	0	0	0	0	0	0	0	0	0	0	0	0	0	0	0	0	0	0	0	0	0	0	0	0
Cab39	1000	2644.74	2687.37	2773.95	2929.47	2627.11	2403.16	2653.42	2335.79	2454.47	2347.63	2594.47	2557.89	3028.16	2903.42	2539.74	2993.68	2616.58	3028.16	2967.37	3011.84	2676.84	3321.58	3023.16	3061.58	3445	2626.32	2626.32	2526.84	2632.89	2985
Itm2c	1000	19730.2	18464.9	20789	19418.5	18996.5	18556.8	16970.4	15469.4	18243.6	18661.6	16751	18272.2	21353.3	19721.3	17543.5	24210.5	24201.1	26648.7	23346.3	23860.7	19683.3	26935.3	24492.6	25816.7	26495.1	21400.7	23863.6	24891.8	25964.4	24036.6
4933407L21Rik	1000	81.0105	83.6237	114.111	68.8153	84.4948	76.6551	93.2056	98.4321	82.7526	76.6551	62.7178	68.8153	92.3345	58.3624	71.4286	264.808	229.965	275.261	185.54	283.101	162.892	206.446	270.906	241.289	236.934	140.244	196.864	222.125	223.868	143.728
Gpr55	1000	1.96078	2.7451	3.92157	0.784314	3.13725	0.784314	2.7451	6.66667	2.7451	0.784314	1.96078	2.35294	1.17647	5.09804	1.96078	2.7451	3.52941	5.88235	1.17647	3.52941	1.96078	2.35294	5.4902	1.56863	7.05882	1.96078	7.05882	6.66667	3.52941	1.96078
Spata3	1000	8.11486	20.5993	14.3571	14.3571	15.6055	17.4782	9.3633	11.236	11.236	6.86642	16.2297	11.8602	20.5993	19.3508	14.9813	18.7266	16.2297	13.7328	10.6117	17.4782	8.11486	19.3508	14.9813	21.2235	17.4782	12.4844	9.98752	14.9813	26.8414	9.3633
2810459M11Rik	1000	217.953	247.673	278.595	233.563	222.456	213.149	191.534	178.925	238.367	203.242	244.371	231.162	305.014	291.504	251.576	172.621	204.443	214.35	177.424	194.236	179.526	233.563	179.826	196.638	282.198	169.319	240.168	235.665	243.771	221.555
Psmd1	1000	1832.62	1868.86	1988.02	1957	1816.65	1658.17	1693.18	1687.04	1769.66	1625.92	1689.19	1630.22	1972.36	1838.76	1601.04	2117.94	1935.5	2381.45	2062.35	2109.03	1775.18	2492.32	2253.07	2269.35	2389.74	1864.25	1847.97	1861.18	1828.32	1918.61
Htr2b	1000	0	0	0	1.44788	1.9305	0.965251	0.965251	0	0	0	1.44788	0	0.482625	0	0	0	0.965251	0.965251	0.965251	0.482625	0.482625	0.965251	2.89575	0.482625	0.965251	0.482625	3.37838	0	2.41313	1.9305
Armc9	1000	229.452	231.545	258.752	260.084	221.081	218.417	238.394	216.134	214.231	235.921	245.244	238.965	275.495	246.766	220.89	309.17	278.919	373.478	273.592	291.857	227.93	309.741	308.409	347.222	318.493	299.467	302.892	318.113	337.9	301.56
B3gnt7	1000	10.0193	8.47784	10.4046	10.79	14.2582	8.47784	15.0289	20.4239	9.24855	11.9461	9.24855	17.7264	14.6435	11.1753	12.7168	12.7168	15.7996	15.0289	12.7168	16.185	9.63391	14.2582	8.47784	11.5607	14.6435	8.47784	12.3314	11.1753	15.4143	11.9461
Ncl	1000	1623.11	1704.13	1833.72	1759.36	1621.78	1450.65	1442.41	1423.04	1549.84	1507.45	1572.24	1534.7	1830.45	1701.95	1536.15	2184.57	1910.14	2302.29	1998.18	2165.31	1696.38	2324.82	2163.74	2185.9	2515.93	1876.47	2073.03	2159.26	2132.61	2056.56
Snora75	1000	17.2414	60.3448	112.069	137.931	43.1034	43.1034	86.2069	60.3448	43.1034	86.2069	77.5862	60.3448	94.8276	68.9655	68.9655	60.3448	51.7241	129.31	60.3448	25.8621	0	25.8621	34.4828	34.4828	112.069	60.3448	43.1034	77.5862	51.7241	68.9655
Gm24148	1000	68.0272	95.2381	102.041	88.4354	68.0272	54.4218	54.4218	34.0136	40.8163	47.619	102.041	47.619	88.4354	74.8299	95.2381	27.2109	68.0272	81.6327	27.2109	47.619	34.0136	20.4082	68.0272	40.8163	74.8299	40.8163	81.6327	47.619	68.0272	54.4218
Snord82	1000	0	0	0	0	0	0	14.7059	14.7059	0	0	0	0	0	0	0	0	0	0	0	0	0	0	0	0	0	0	0	14.7059	0	0
C130036L24Rik	1000	83.7283	45.0237	53.7125	58.4518	59.2417	50.5529	43.4439	44.2338	45.0237	50.5529	57.6619	41.0742	74.2496	51.3428	47.3934	63.981	52.1327	49.763	58.4518	61.6114	46.6035	61.6114	61.6114	63.1912	63.981	42.654	50.5529	53.7125	56.872	40.2844
Nmur1	1000	4.92611	9.85222	4.10509	5.74713	6.56814	2.46305	3.28407	0.821018	2.46305	3.28407	7.38916	4.10509	3.28407	4.92611	3.28407	2.46305	2.46305	4.92611	2.46305	2.46305	6.56814	9.85222	4.10509	0.821018	0.821018	0.821018	1.64204	1.64204	1.64204	3.28407
1700019O17Rik	1000	1.16212	0	1.16212	1.16212	1.16212	0	0	0	0	0.581058	1.16212	0	0	1.74317	0	0	1.16212	1.74317	0	0	1.16212	0.581058	1.16212	1.16212	0	0	0	0.581058	0.581058	0
Ptma	1000	7556.21	8752.52	8181.21	8222.32	7218.12	6952.18	6289.43	5353.19	6790.27	7580.54	8504.19	8749.16	9828.86	9681.21	8035.23	8354.03	7555.37	9433.72	8031.04	8301.17	7786.91	9396.81	8122.48	9364.09	11511.7	8954.7	8677.01	10197.1	10327.2	8887.58
Pde6d	1000	1273.81	1475.27	1389.19	1332.42	1299.45	1244.51	1252.75	1077.84	1181.32	1176.74	1296.7	1163.92	1265.57	1347.99	1224.36	1771.98	1632.78	1978.02	1688.64	1823.26	1554.03	2018.32	2020.15	1987.18	1936.81	1593.41	1601.65	1802.2	1814.1	1593.41
Cops7b	1000	376.513	390.408	385.477	388.615	342.896	323.173	342.447	314.209	337.517	339.758	379.202	371.134	438.368	396.683	365.755	377.857	341.999	411.923	337.069	322.277	349.171	371.134	339.758	404.751	447.333	401.614	424.025	377.857	417.302	390.856
Nppc	1000	51.8234	96.929	84.453	57.5816	86.3724	47.9846	156.43	113.244	81.5739	92.1305	101.727	82.5336	112.284	108.445	107.486	41.2668	38.3877	31.6699	66.2188	32.6296	69.0979	34.5489	25.9117	33.5893	68.1382	51.8234	59.501	49.904	66.2188	93.0902
Dis3l2	1000	389.782	397.351	412.173	415.326	373.384	330.81	366.446	350.993	401.451	373.068	352.57	394.197	450.962	457.269	380.322	510.88	499.212	589.404	514.349	526.017	426.364	566.067	555.03	516.872	614.317	456.323	489.12	513.403	523.179	503.311
Alppl2	1000	0	0	0	0	0	0	0	0	0	0	0	0	0	0	0	0	0	0	0	0	0	0	0	0	0	0	0	0	0	0
Alpi	1000	0	0	0	0	0	0	0	0	0	0	0	0	0	0	0	0	0	0	0	0	0	0	0	0	0	0	0	0	0	0
Akp3	1000	0.595238	0.595238	0	0	0	0	0	1.78571	1.19048	0	0.595238	0	0.595238	0	0	0	0	0	0	0	0	0	2.38095	0	0	0	0	0	0	0
Ecel1	1000	26.8007	20.1005	22.7806	22.1106	20.1005	20.7705	31.1558	62.3116	19.7655	26.1307	26.4657	44.8911	35.1759	46.2312	29.1457	1004.02	830.821	1043.89	727.303	899.497	553.769	1034.17	1037.19	906.198	590.955	911.223	905.193	970.184	1051.59	639.196
Prss56	1000	0.50025	1.50075	2.001	0	0	0	6.50325	10.5053	2.001	1.50075	1.0005	1.0005	1.0005	1.50075	2.001	87.0435	187.094	189.095	129.065	139.07	34.5173	112.056	91.0455	118.559	107.054	40.02	81.0405	109.055	111.556	71.0355
Chrnd	1000	0	0	0	0	0.337268	0	0	0	0	0	0	0	0	0	0	0	0	0	0	0	0	0	0	0	0	0	0	0	0	0
Chrng	1000	0	0	0	0	0	0	0	0	0	0	0	0	0	0	0	0	0	0	0	0	0	0	0	0	0	0	0	0	0	0
Eif4e2	1000	395.089	458.198	448.255	446.429	437.5	389.61	451.907	379.058	393.263	405.438	422.687	416.396	485.593	468.547	418.831	428.774	385.755	481.94	412.946	424.31	389.205	491.68	445.414	492.289	536.323	436.08	444.805	422.078	446.631	484.984
Efhd1	1000	442.659	916.898	457.064	480.886	627.147	394.46	676.454	525.762	494.183	749.584	594.46	799.446	587.812	1090.3	750.693	1016.07	712.465	1013.3	887.535	986.704	1095.84	1168.42	892.521	964.543	1515.79	1194.46	1029.36	1217.17	1385.04	1151.25
Gigyf2	1000	642.347	640.954	713.216	699.634	590.284	570.085	559.986	497.301	565.21	538.395	565.906	614.139	709.734	634.512	581.578	578.443	558.419	666.202	574.787	563.643	476.58	691.799	620.93	649.835	659.586	503.744	535.26	497.998	526.728	548.842
Kcnj13	1000	17.0497	6.67161	14.0845	22.98	12.6019	674.574	55.5967	43.7361	8.89548	28.169	6.67161	57.8206	14.0845	23.7213	20.0148	59.3032	52.6316	3134.91	106.746	80.8006	27.4277	15.5671	1776.13	2742.77	128.984	2464.05	83.7658	39.2884	123.795	10.3781
3110079O15Rik	1000	0	19.4805	8.65801	8.65801	8.65801	4.329	6.49351	4.329	6.49351	8.65801	6.49351	2.1645	6.49351	4.329	2.1645	49.7835	62.7706	75.7576	71.4286	60.6061	47.619	88.7446	62.7706	54.1126	84.4156	38.961	56.2771	43.29	43.29	64.9351
Ngef	1000	1181.15	1419.33	1488.48	1417.55	1296.99	1232.57	3934.69	3807.33	1276.3	1359.34	1587.17	1377.36	1787.23	1661.05	1535.17	8684.99	7379.73	8126.77	7476.06	7684.99	6181.74	7601.95	8152.48	7997.93	7502.36	9061.47	9523.05	9795.21	9919.92	8891.55
Neu2	1000	10.4322	11.9225	16.3934	15.8967	16.3934	9.93542	90.4123	80.9737	14.4064	21.3612	20.3676	14.4064	13.9096	19.8708	13.9096	291.108	216.095	269.747	224.54	261.798	222.057	232.489	245.405	260.805	250.373	241.927	275.708	277.695	295.579	239.94
Inpp5d	1000	121.053	153.036	150.202	138.057	129.96	116.802	166.194	151.012	122.47	123.482	104.251	142.915	146.356	145.142	115.789	193.32	170.445	192.51	165.385	171.457	158.502	183.603	184.008	178.745	211.336	173.887	191.093	153.036	197.368	192.713
Atg16l1	1000	923.27	929.874	1013.84	991.509	817.61	860.377	930.503	829.56	837.736	848.742	950	906.289	1133.65	973.585	916.352	1033.02	1006.92	1206.92	1029.25	983.648	860.692	1135.22	1116.98	1171.7	1166.04	1047.17	1058.49	1072.33	1116.04	1142.45
Scarna6	1000	48.3871	32.2581	52.4194	52.4194	56.4516	16.129	52.4194	16.129	32.2581	28.2258	60.4839	20.1613	36.2903	68.5484	40.3226	40.3226	72.5806	44.3548	24.1935	40.3226	16.129	52.4194	52.4194	32.2581	12.0968	32.2581	28.2258	36.2903	40.3226	28.2258
Sag	1000	39.5809	39.5809	47.7299	45.4016	41.9092	56.461	95.4598	59.9534	32.014	38.4168	52.3865	42.4913	43.6554	42.4913	36.0885	30.2678	36.6705	36.6705	33.1781	32.596	26.1932	28.5215	25.0291	30.2678	28.5215	40.7451	33.7602	26.1932	32.596	32.014
Dgkd	1000	1227.26	1130.66	1325.43	1265.02	1167.9	1086.93	974.886	865.472	1088.34	1037.76	1148.05	1249.91	1456.45	1296.98	1221.81	827.713	780.119	869.512	796.101	801.37	678.609	852.476	829.996	888.83	1031.09	710.397	826.835	686.512	771.865	823.147
Usp40	1000	221.031	219.902	247.366	247.366	188.676	221.407	173.627	165.538	192.438	200.339	229.496	227.239	262.039	223.1	201.091	226.674	220.09	306.433	205.418	231.377	189.428	222.724	228.367	272.009	285.365	244.921	234.951	211.813	234.763	211.813
Ugt1a10	1000	0	0	0	0	0	0	0	0	0.925355	0	0	0	0	0	0	0	0	0	0	0	0	0	0	0	0	0	0	0	0	0
Ugt1a9	1000	0	0	1.86567	0	0	0	0	0	4.66418	0.932836	0	0.310945	1.86567	0	2.17662	0	0	3.4204	0	0	0	0	0	0.621891	0	0	1.24378	0	0	0
Ugt1a7c	1000	3.64299	4.25015	6.67881	4.55373	4.85732	3.94657	5.46448	1.51791	6.07165	3.03582	4.25015	4.85732	3.03582	5.46448	1.82149	6.07165	4.85732	6.67881	4.55373	3.94657	5.46448	6.37523	10.3218	6.37523	10.6254	3.94657	4.85732	8.80389	5.1609	3.64299
Ugt1a6b	1000	0	0	8.28609	0	0.87222	0	0.43611	0	8.7222	1.30833	0	2.18055	10.4666	0.43611	6.54165	0	0	1.74444	0	0	0	0	0.87222	0.87222	0	0	0	0.43611	0	0
Ugt1a6a	1000	8.78256	15.1423	12.7196	8.47971	9.99394	7.87402	11.5082	5.14839	23.622	9.99394	13.6281	15.1423	16.9594	13.6281	21.5021	17.5651	33.3131	32.7075	19.9879	28.4676	14.8395	18.4737	28.1647	29.3761	24.5306	24.5306	23.622	26.3477	25.742	18.7765
Ugt1a5	1000	0	1.24688	33.9776	0.311721	1.24688	0	0.311721	0	21.197	2.80549	0.623441	1.24688	2.80549	1.5586	1.87032	0	0.311721	6.85786	0	0.623441	0	0.311721	0	0	0.311721	0	0	0	0.311721	1.87032
Ugt1a2	1000	0	0	0.311915	0	0	0	0	0	0	0	0	0	0	0	0	0	0	0	0	0.311915	0.311915	0	0	0	0	0	0	0	0	0
Dnajb3	1000	51.1308	45.2311	61.9469	69.8132	59.9803	36.3815	39.3314	55.0639	61.9469	54.0806	58.0138	43.2645	76.6962	59.9803	64.8968	77.6794	60.9636	88.4956	72.763	70.7965	53.0973	82.5959	64.8968	76.6962	58.0138	61.9469	64.8968	79.646	79.646	65.88
Ugt1a1	1000	0	1.54847	84.2366	0.92908	0.619387	0.92908	0.92908	0	59.7708	9.91019	0.92908	2.78724	26.9433	6.19387	22.2979	0	0.309693	20.4398	0	0.619387	0	0	0	1.54847	4.95509	3.09693	0	0.619387	1.85816	1.85816
Mroh2a	1000	0.399893	0.266596	0.933085	0.266596	0.799787	0.933085	0.399893	0	0.266596	0.933085	0.666489	0	0.266596	0.533191	0.266596	0	0.399893	1.59957	0.399893	0	0.266596	0	0.933085	0.133298	0.133298	0.666489	0.133298	0.133298	0.266596	0.266596
Hjurp	1000	35.1937	39.3412	49.1764	44.0811	36.8527	37.3267	47.2805	38.1562	34.3643	44.4365	43.6071	43.3701	45.503	44.318	36.4972	40.6446	49.0579	53.2054	48.9394	45.3845	45.74	51.3094	41.8296	55.2198	62.9221	40.2891	42.7776	39.4597	40.6446	42.7776
6430706D22Rik	1000	0	0	0	0	0	0	0	0	0	0	0	0	0	0	0	0	0	0	0	0	0	0	0	0	0	0	0	0	0	0
A730008H23Rik	1000	0	0	0	0	0	0	0	0	0.45106	0	0	0	0	0	0	1.35318	0	0	0	0	0	0	0	0	0	0	0	0	0	0
Trpm8	1000	0.260146	0.520291	1.04058	0.780437	0.520291	0.520291	0.520291	0	0.260146	0.260146	0.260146	1.30073	0.260146	1.56087	0.520291	0.780437	0.260146	1.30073	1.30073	1.30073	3.12175	2.8616	0.260146	1.82102	0	2.08117	0	1.04058	2.60146	0.520291
Spp2	1000	1.14943	9.1954	78.1609	0	0	0	9.1954	9.1954	85.0575	24.1379	5.74713	9.1954	67.8161	3.44828	37.931	2.29885	2.29885	19.5402	0	2.29885	1.14943	0	1.14943	1.14943	11.4943	5.74713	0	1.14943	2.29885	6.89655
Glrp1	1000	5.62085	4.08789	4.59888	4.08789	5.62085	8.68677	4.08789	4.59888	2.55493	3.5769	4.08789	2.55493	3.5769	3.06592	3.5769	5.62085	3.06592	5.62085	4.59888	6.64282	2.55493	3.06592	3.5769	7.15381	11.7527	2.55493	2.55493	3.5769	7.15381	6.13183
Gm19589	1000	0	0.381388	0.762777	0	0	0	0	0	0.381388	0	0	0.381388	0	0	0.381388	0	0	0	0.381388	0	0	0	0	0	0	0	0	0	0	0
Arl4c	1000	514.372	587.746	560.01	631.871	554.211	466.717	884.771	687.09	507.564	657.842	528.996	496.722	521.18	608.674	495.714	545.134	505.043	508.069	562.532	538.326	539.839	774.584	466.465	566.314	669.44	399.395	462.179	433.434	465.204	621.533
Platr5	1000	0	0	0	0	2.10084	0	0	2.10084	0	2.10084	0	2.10084	0	0	0	0	0	2.10084	0	0	0	0	0	0	0	0	0	0	2.10084	0
1700067G17Rik	1000	0	0	0	0	0	0	0	0	0	0	0	0	0	0	0	0	0	0	0	0	0	0	0	1.65837	0	0	0	0	0	0
Sh3bp4	1000	294.038	394.5	356.384	358.562	394.228	322.352	229.785	234.958	308.195	322.897	279.88	300.299	390.961	396.678	320.991	221.345	246.937	293.493	241.492	241.492	212.36	314.457	233.597	268.445	292.404	203.648	216.717	221.073	229.785	243.398
C030007H22Rik	1000	0	0	0	0	6.79117	0	1.69779	0	0	0	0	0	3.39559	0	0	20.3735	27.1647	23.7691	8.48896	18.6757	10.1868	13.5823	16.9779	22.0713	27.1647	18.6757	15.2801	27.1647	18.6757	15.2801
Agap1	1000	821.626	965.035	948.753	945.1	820.165	749.504	744.286	633.65	746.582	780.086	728.108	820.687	858.679	898.236	714.017	1188.5	1101.66	1244.23	1091.95	1213.65	1026.41	1363.53	1224.4	1170.86	1461.85	1083.6	1188.92	1117.42	1243.09	1143.83
4933400F21Rik	1000	0	0	0	0	0	0	0	0	0	0	0	0.276932	0	0	0	0	0	0.276932	0.276932	0	0	0	0	0	0	0	0	0.276932	0	0
Gbx2	1000	0.940734	1.4111	1.4111	13.1703	0.470367	2.8222	2.8222	0.470367	0.940734	0.940734	0.470367	1.4111	4.2333	0.470367	1.4111	26.3405	17.4036	33.8664	15.0517	18.8147	19.285	42.333	16.9332	15.9925	15.5221	12.2295	17.8739	15.0517	18.8147	14.5814
Asb18	1000	45.584	29.9145	56.2678	53.4188	32.0513	40.5983	5.69801	4.2735	37.037	19.2308	17.094	23.5043	36.3248	34.188	24.9288	30.6268	24.2165	34.9003	32.0513	32.0513	24.9288	47.7208	30.6268	30.6268	31.339	18.5185	19.2308	22.792	27.7778	17.8063
Iqca	1000	36.4486	35.8255	33.9564	20.2492	30.8411	24.6106	10.5919	14.9533	26.1682	33.3333	18.0685	57.9439	20.5607	30.5296	21.8069	24.9221	99.3769	49.2212	40.4984	71.3396	33.0218	73.8318	51.7134	94.3925	68.2243	22.4299	78.1931	71.028	68.8474	44.5483
Ackr3	1000	258.732	279.431	329.452	287.624	263.476	292.367	166.451	171.194	287.193	217.335	250.97	295.386	299.267	294.955	246.227	132.816	163.433	206.555	144.89	147.046	142.303	147.477	175.075	200.949	164.295	174.213	156.102	130.66	135.403	211.729
Cops8	1000	2064.03	2117.74	2163.32	2193.71	1986.98	1899.08	1889.31	1724.91	1978.3	1871.41	2027.67	2056.97	2370.05	2160.61	1982.09	2190.99	2132.94	2476.4	2264.79	2281.61	2034.73	2503.53	2295.17	2326.1	2502.98	1969.61	2100.38	2107.98	2062.94	2186.65
Col6a3	1000	11.7148	22.3227	18.7252	16.1424	29.7943	14.0208	14.9433	11.9915	14.3898	14.3898	14.0208	34.4987	17.8028	29.7943	10.6079	18.0795	12.4527	17.8028	15.3122	14.0208	24.2598	23.2451	15.8657	19.6476	17.6183	20.1088	13.6519	14.6665	18.633	23.1528
Mlph	1000	27.8769	31.4451	38.3586	33.4523	28.5459	25.8698	26.5388	26.9848	35.4594	29.884	24.3087	38.5816	31.2221	40.3657	26.3158	26.7618	29.661	32.5602	25.6467	27.6539	28.769	35.6824	33.2293	35.0134	41.0348	31.2221	30.9991	26.9848	31.2221	35.0134
Prlh	1000	0	0	3.83142	0	3.83142	0	0	0	0	0	0	0	0	0	0	0	0	0	0	0	0	0	0	0	0	0	0	0	0	0
Rab17	1000	0	1.02564	11.2821	0.512821	0	0	2.5641	1.53846	9.74359	3.58974	0	1.02564	8.20513	0.512821	3.07692	0	0	3.07692	0	0	0	0	0	0.512821	1.02564	2.5641	0.512821	0	0	0
Lrrfip1	1000	583.841	624.761	664.287	687.968	630.333	576.006	550.061	522.723	549.364	568.344	648.616	622.671	694.933	683.963	600.557	335.191	338.673	361.135	350.688	337.106	348.947	387.428	315.34	419.815	498.172	285.217	355.389	290.441	317.43	405.711
Rbm44	1000	0.259673	0.259673	0.259673	0.519346	0.259673	0.259673	0.259673	0	0.259673	1.03869	0.519346	0	0	0.259673	0.519346	0.259673	0	0	0.519346	1.29836	0.519346	0.259673	0	0.779018	0.779018	0.259673	0	1.03869	0	1.03869
Ramp1	1000	771.013	787.558	900.728	874.255	765.387	747.187	646.592	520.847	724.686	733.289	878.557	791.86	975.844	858.372	853.077	1058.57	959.96	988.749	993.713	988.087	825.943	1125.41	1026.14	1064.86	1093.98	995.036	1061.55	1119.13	1172.4	1072.14
Ube2f	1000	911.225	967.718	1001.47	1000	879.677	812.913	910.492	865.737	868.672	822.45	906.823	900.954	1012.47	978.723	838.591	981.658	866.471	1088.77	919.296	891.416	892.15	1097.58	974.321	1135	1207.63	953.778	932.502	882.612	886.28	1015.41
Scly	1000	304.486	368.826	400.997	384.232	342.093	342.093	323.969	290.893	377.435	344.812	343.453	361.577	439.511	380.607	335.297	274.128	221.115	355.233	273.675	306.751	289.08	315.36	294.064	373.811	386.951	321.251	231.536	241.504	286.362	285.908
Espnl	1000	0.367512	0.183756	0.367512	0	0.551268	0.551268	11.3929	10.2903	0.551268	1.10254	1.28629	0.735024	0.91878	0.735024	1.28629	0.367512	0	0.551268	2.02132	0.367512	1.47005	1.10254	0.91878	1.47005	2.02132	2.38883	0.367512	0.551268	0.551268	6.61521
Klhl30	1000	0.993377	0.993377	0	2.64901	0.993377	5.29801	4.30464	2.64901	0.331126	0.993377	0.331126	0.331126	0.662252	0.331126	0.662252	0	0	5.62914	0.331126	0.993377	0.662252	0.993377	3.31126	4.96689	2.31788	8.9404	1.98675	0.662252	0.993377	2.64901
Fam132b	1000	0.71048	1.42096	0	0.71048	0	0	9.94671	13.8544	0	0.35524	0.71048	0	0	1.06572	0	0.71048	2.13144	2.13144	6.39432	1.42096	6.03908	2.48668	0.35524	6.03908	14.5648	4.61812	3.90764	2.48668	3.19716	13.4991
Ilkap	1000	1054.82	1196.64	1230.26	1230.99	1105.99	1102.34	1166.67	960.526	1052.63	1147.66	1157.16	1138.89	1291.67	1186.4	1044.59	1131.58	1117.69	1241.23	1100.15	1159.36	1048.25	1255.85	1057.02	1249.27	1400.58	1010.23	1144.74	1097.22	1184.94	1218.57
1700020N18Rik	1000	7.31261	1.82815	3.65631	1.82815	0	7.31261	10.9689	14.6252	1.82815	5.48446	1.82815	1.82815	1.82815	3.65631	5.48446	1.82815	1.82815	7.31261	3.65631	1.82815	5.48446	0	3.65631	3.65631	10.9689	7.31261	0	0	0	10.9689
Hes6	1000	319.101	336.33	402.996	345.318	330.337	366.292	379.775	325.843	296.629	385.768	329.588	289.139	431.461	349.064	311.61	269.663	293.633	495.131	328.839	290.637	298.876	379.775	337.079	445.693	414.232	323.596	285.393	266.667	287.64	331.835
Per2	1000	322.255	395.409	403.803	371.766	338.359	336.988	377.249	342.299	302.895	379.818	415.796	390.098	512.763	475.244	419.907	310.262	330.307	382.902	297.584	270.344	190.68	369.197	353.778	378.105	414.254	401.405	542.231	477.985	499.4	442.864
Traf3ip1	1000	236	255.429	270.286	266.571	268.286	252.286	279.143	254.857	226.286	258.286	238.857	277.714	299.714	282.571	273.429	244.857	256.571	340.857	240.286	260.286	227.714	288.571	304.571	338	324.286	267.714	242.286	238	266	253.714
Asb1	1000	408.267	411.561	413.208	403.162	396.245	393.445	370.718	356.719	385.375	353.59	338.933	370.224	431.653	438.241	340.25	422.596	388.011	452.075	400.033	409.585	400.362	461.462	415.843	420.125	472.332	358.86	378.623	336.462	375.329	408.926
Twist2	1000	44.2073	40.3963	32.7744	37.3476	40.3963	37.3476	38.1098	48.0183	37.3476	42.6829	45.7317	41.1585	57.9268	61.7378	49.5427	0	1.52439	1.52439	5.33537	3.04878	12.9573	2.28659	0	14.4817	19.8171	4.57317	16.7683	2.28659	3.04878	23.628
Hdac4	1000	313.054	293.79	314.322	296.324	281.876	301.648	322.94	285.425	293.029	274.018	248.416	324.208	323.701	356.147	245.12	285.678	284.157	294.297	303.676	242.839	280.355	268.948	286.946	319.645	395.944	278.834	312.041	175.158	219.265	351.077
Ndufa10	1000	4891.65	5124.9	5196.86	5179.49	4918.94	4550.87	4768.4	4118.28	4715.47	4680.73	5248.14	4973.53	5920.6	5533.5	4962.78	5019.02	4352.36	5084.37	4863.52	4723.74	4534.33	5920.6	5046.32	5177.01	5584.78	4560.79	4550.87	4708.85	4756.82	5332.51
Mir6900	1000	16.6667	0	16.6667	0	0	0	16.6667	0	0	0	0	0	0	0	16.6667	0	16.6667	0	0	0	0	0	0	0	0	0	0	33.3333	16.6667	0
Olfr1416	1000	0	0	0	0	0	0	0	0	0	0	0	0	0	0	0	0	0	0	0	0	0	0	0	0	0	0	0	0	0	0
Olfr1415	1000	0	0	0	0	0	0	0	0	0	0	0	0	0	0	0	0	0	0	0	0	0	0	0	0	0	0	0	0	0	0
Olfr1414	1000	0	0	0	0	0	0	0	0	0	0	0	0	0	0.841043	0	0	0	0	0	0	0	0	0	0	0	0.841043	0	0	0	1.68209
Olfr1413	1000	0	0	0	0	0	0	0	0	0	0	0	0	0	0	0	0	0	0	0	0	0	0	0	0	0	0	0	0	0	0
Olfr1412	1000	0	0	0	0	0	0	0	0	0	0	0	0	0	0	0	0	0	0	0	0	0	0	0	0	0	0	0	0	0	0
Olfr1411	1000	0	0	0	0	0	0	0	0	0	0	0	0	0	0	0	0	0	0	0	0	0	0	0	0	0	0	0	0	0	0
Olfr1410	1000	0	0	0	0	0	0	0	0	0	0	0	0	0	0	0	0	0	0	0	0	0	0	0	0	0	0	0	0	0	0
Olfr12	1000	0	0	0	0	0	0	0	0	0	0	0	0.892061	0	0	0	0	0.892061	0	3.56824	1.78412	0	0	0.892061	0	1.78412	0	0	0	0	0
Myeov2	1000	2859.35	3184.25	3248.95	3032.35	3012.66	3070.32	2548.52	2078.76	2915.61	2859.35	3797.47	3267.23	3846.69	3644.16	3298.17	2568.21	1988.75	2876.23	2631.5	2389.59	2406.47	3032.35	2538.68	2850.91	3084.39	2625.88	2338.96	2323.49	2662.45	2931.08
Otos	1000	11.3636	22.7273	21.3068	25.5682	18.4659	19.8864	2.84091	7.10227	21.3068	18.4659	88.0682	71.0227	55.3977	66.7614	45.4545	5.68182	0	4.26136	0	0	7.10227	5.68182	1.42045	5.68182	2.84091	0	5.68182	4.26136	1.42045	2.84091
Gpc1	1000	1887.67	1722.13	1890.2	1809.12	1669.48	1847.69	1270.55	1164.13	1729.17	1595.16	2120.5	2048.7	2376.69	2324.61	1892.17	1375	1374.16	1580.52	1371.34	1410.19	1288.01	1889.08	1458.61	1534.63	1556.31	1179.9	1193.13	1180.46	1304.05	1441.44
Mir149	1000	15.1515	90.9091	30.303	106.061	15.1515	45.4545	45.4545	106.061	15.1515	121.212	90.9091	15.1515	30.303	151.515	30.303	30.303	30.303	15.1515	75.7576	15.1515	45.4545	45.4545	15.1515	15.1515	75.7576	0	45.4545	45.4545	75.7576	90.9091
Ankmy1	1000	4.62535	2.46685	4.9337	4.31699	3.70028	3.08356	5.55042	3.08356	5.24206	4.00863	1.85014	4.31699	4.62535	3.39192	1.23343	5.55042	5.85877	4.9337	3.39192	6.16713	3.39192	4.31699	9.86741	8.01727	4.31699	4.00863	4.31699	4.9337	5.24206	4.62535
Dusp28	1000	493.628	557.344	559.356	528.504	482.227	505.701	687.458	545.272	501.006	533.87	587.525	503.689	629.779	590.208	503.689	606.975	631.791	708.249	564.722	577.465	517.103	743.125	636.486	719.651	718.981	551.308	542.589	633.132	655.936	641.18
Rnpepl1	1000	520.237	672.59	663.705	599.868	562.685	520.237	590.326	514.314	514.972	563.343	621.257	605.791	700.888	698.585	622.902	547.219	528.134	664.363	513.327	591.313	530.109	596.907	580.783	594.274	758.144	615.663	641.329	646.594	699.572	586.706
9430060I03Rik	1000	8.37321	2.39234	1.79426	8.37321	8.97129	4.78469	8.37321	7.17703	10.1675	5.98086	4.1866	2.39234	7.77512	4.78469	7.77512	10.7656	4.1866	16.1483	7.17703	4.78469	5.38278	10.7656	10.7656	7.77512	9.56938	7.77512	7.17703	14.9522	10.1675	5.98086
Capn10	1000	370.177	417.796	434.828	444.56	374.001	375.043	402.85	367.397	376.781	391.032	424.053	431.005	482.099	452.902	367.049	455.335	450.122	553.702	432.395	456.031	388.599	538.408	486.966	544.317	489.051	417.449	421.272	439.694	464.373	453.945
Gpr35	1000	1.55625	3.55714	4.89106	4.2241	4.66874	3.33482	1.77857	4.00178	3.11249	5.11338	4.00178	6.44731	2.89017	2.00089	2.00089	2.00089	5.11338	3.11249	2.89017	6.66963	3.11249	7.78124	3.33482	2.89017	5.3357	4.66874	5.55803	5.55803	5.55803	2.89017
Aqp12	1000	0	0	0	0	0	0	0	0	0	0	0	0	0	0	0	0	0	0	0	0	0	0	0	0	0	0	0	0	0	0
Kif1a	1000	7235.19	8366.9	8030.89	8135.44	7834.52	6923.09	9414.13	8675.76	7327.97	7367.14	6395.63	6847.61	8085.09	8348.04	6664.46	8446.46	7701.36	9104.8	8635.38	8146.02	8259.46	9710.13	8517.25	8975.24	11034.1	8028.96	7920.92	7425.67	8436.85	9263.43
Agxt	1000	0.643915	9.65873	127.495	0	3.86349	0.643915	1.28783	0.643915	171.925	42.4984	6.43915	12.2344	115.261	10.3026	66.3232	0	2.57566	48.9375	0	3.21958	0.643915	0	0	7.72698	23.8249	11.5905	4.50741	3.21958	7.08307	7.08307
2310007B03Rik	1000	0.42337	0	0.42337	0	0	2.96359	0	0.42337	0	1.69348	0	3.38696	0	1.69348	0	1.27011	1.27011	23.7087	1.69348	1.27011	0.42337	2.11685	6.35055	10.1609	0	9.73751	2.11685	0.84674	2.11685	0
Sned1	1000	88.2879	127.179	111.533	116.451	104.828	102.593	116.898	93.4287	80.9119	96.5579	96.3344	106.392	110.416	138.355	105.722	108.851	107.063	192.892	92.5346	111.086	94.5463	123.38	130.979	140.367	145.06	136.12	105.498	114.662	124.721	76.2181
Mir6901	1000	0	0	0	0	0	0	0	0	0	0	0	0	0	0	0	0	0	0	0	0	0	0	0	0	0	0	0	0	0	0
Mterf4	1000	144.193	154.148	171.041	169.532	138.462	139.668	129.11	101.357	124.585	136.35	137.255	160.784	157.466	144.193	135.445	149.925	133.635	178.884	139.97	148.115	122.172	183.409	152.338	161.991	158.673	147.511	129.412	150.528	148.718	155.053
Pask	1000	30.6701	37.1166	41.0236	38.4841	27.9351	30.084	39.8515	35.5538	26.5677	34.9678	34.7724	29.6933	31.8422	27.1537	26.763	57.6284	82.0473	84.3915	51.7679	76.5775	45.126	77.1635	64.2704	71.4983	70.5216	51.3772	65.0518	58.4098	70.3262	55.0889
Ppp1r7	1000	953.189	1016.97	1053.65	1022.17	951.82	887.49	916.233	937.312	906.105	867.506	972.899	1055.3	1296.19	1213.25	1056.39	2563.65	2404.87	2607.99	2062.69	2508.62	1582.81	2488.91	2566.38	2305.5	2260.06	2192.17	2486.18	2655.35	2592.94	2018.61
Mir6902	1000	15.625	15.625	0	0	0	15.625	0	46.875	0	0	31.25	46.875	0	15.625	31.25	0	0	46.875	31.25	0	0	62.5	0	0	0	15.625	0	0	0	15.625
Mir6345	1000	0	15.625	0	15.625	0	15.625	15.625	23.4375	0	0	0	15.625	0	0	15.625	15.625	23.4375	7.8125	7.8125	0	7.8125	15.625	7.8125	0	0	0	15.625	0	0	7.8125
Ano7	1000	1.74173	1.99054	5.474	4.72754	2.98582	5.72282	6.22045	5.97163	1.49291	2.98582	3.48345	4.97636	3.98109	4.22991	4.97636	8.95745	11.4456	13.9338	10.948	11.4456	4.22991	14.4315	16.422	17.1684	9.45509	9.70391	9.45509	12.9385	13.9338	10.948
Hdlbp	1000	1524.04	1504.41	1584.63	1596.69	1465.45	1462.98	1407.02	1261.25	1444.12	1370.54	1354.31	1488.64	1643.69	1604.88	1373.16	1757.3	1637.04	2138.97	1621.58	1686.5	1428.51	1989.49	1876.02	1999.23	1953.32	1763.02	1667.03	1515.54	1619.88	1710.16
2002-09-01	1000	926.215	1155.97	1039.59	1030.89	900.42	871.926	919.916	775.645	885.123	929.814	939.712	947.51	1057.29	1054.29	924.415	1226.15	1103.48	1350.03	1117.58	1288.84	1147.27	1383.62	1260.35	1274.75	1529.99	1171.57	1172.77	1298.44	1289.14	1160.47
Farp2	1000	86.9121	87.4233	93.3027	93.047	82.3108	96.3701	75.1534	59.3047	86.1452	67.9959	84.3558	87.6789	87.9346	98.6708	76.4315	120.654	118.354	138.548	101.738	110.429	99.9489	117.843	104.55	125	117.076	149.796	143.149	140.337	130.624	124.489
Stk25	1000	3340.81	3629.38	3782.73	3679.16	3514.44	3255.69	3120.16	3011.37	3168.72	3225.26	3396.74	3371.54	4163.49	3870.62	3478.49	2879.23	2584.51	2989.55	2897.05	2811	2661.34	3014.14	2716.66	3154.89	3281.5	2475.41	2718.19	2643.52	2712.05	3189.31
Bok	1000	1740.22	1207.4	1368.02	1538.41	1310.06	1592.88	1472.77	1063.55	1290.5	1243.72	2631.98	2731.15	2783.52	2687.15	2210.2	498.603	474.162	521.648	805.866	552.374	1006.98	1178.77	512.57	776.536	774.441	508.38	544.693	407.123	495.81	1245.11
Thap4	1000	289.815	331.481	380.093	405.556	297.685	304.63	378.704	338.889	306.019	304.167	295.37	331.019	384.259	323.611	311.111	480.093	457.87	569.907	447.222	418.519	365.741	564.352	550	543.981	472.222	478.704	447.685	503.704	493.519	477.778
Atg4b	1000	903.171	925.439	973.347	1024.29	912.955	843.455	822.2	756.748	823.887	867.409	838.057	899.123	1016.53	981.107	848.178	1016.19	877.868	1031.38	925.439	985.83	884.278	1097.17	975.371	1049.93	1117.07	807.692	887.652	818.826	847.166	937.922
Dtymk	1000	654.198	619.084	667.176	616.031	603.053	512.214	570.229	500.763	561.832	602.29	674.046	570.229	722.901	674.809	618.321	658.015	623.664	675.573	624.427	670.229	581.679	674.809	643.511	731.298	767.176	622.137	635.878	648.855	697.71	670.229
Ing5	1000	181.798	200.749	200.088	197.664	174.086	175.628	174.747	152.71	170.56	182.019	180.476	162.627	211.106	196.342	168.797	254.958	258.484	285.588	209.123	268.841	200.088	254.077	219.921	270.604	267.739	242.838	265.535	247.907	271.926	272.587
D2hgdh	1000	197.515	185.742	216.481	209.614	176.259	206.998	128.842	126.88	190.974	177.894	178.548	217.135	219.097	201.112	191.302	190.974	189.666	235.121	195.226	169.719	134.075	200.131	209.941	222.368	205.363	208.96	199.15	187.704	182.799	169.392
Gal3st2	1000	0.702741	0	0.702741	1.05411	1.75685	0.702741	0.35137	0	0.35137	0	0.35137	1.05411	0.35137	0.702741	0.35137	0	0	1.05411	0	0	0	0	0	0.35137	0	0.35137	0	0	0	0
Gm9994	1000	0	0	0	0.843882	0	0	0	0	0	0.843882	0	0.843882	0	0	0	0	0	0	0	0	0	0	0	0	0	0	0	0	0	0
Gm6086	1000	0.492732	0	0.985464	0.985464	0	0	0	0.739098	0.492732	0.246366	0.246366	0.246366	0.492732	0	0	0.246366	0	0	0	0	0	0	0	0.246366	0	0	0.246366	0	0	0.246366
Neu4	1000	90.0821	138.008	107.167	110.717	107.389	83.4258	76.5476	68.7819	102.063	94.5196	124.917	123.586	105.17	142.667	91.1915	97.1822	94.9634	93.1884	79.2101	106.279	93.854	129.354	86.3102	90.0821	127.579	84.3133	96.9603	110.051	108.054	98.9572
Pdcd1	1000	0	0	1.5544	0.518135	3.62694	2.59067	0.518135	1.03627	0.518135	1.03627	0	2.59067	0.518135	2.59067	1.5544	1.03627	1.5544	2.07254	2.59067	5.69948	3.62694	4.66321	1.03627	3.10881	4.66321	3.10881	1.5544	3.10881	1.5544	1.5544
4930440C22Rik	1000	0	0	0	1.27796	0	1.27796	0	0	0	0	0	0	0	0	0	0	0	0	0	0	0	0	0	0	0	0	0	0	0	0
Fam174a	1000	1078.79	1059.8	1174.66	1172.76	1071.67	1004.27	897.01	789.274	1001.42	954.438	1060.75	1046.51	1252.02	1150.45	1025.63	1313.72	1171.33	1425.25	1208.35	1288.56	1066.45	1424.3	1273.85	1365.92	1430.94	1061.7	1035.12	1185.1	1159.47	1170.86
St8sia4	1000	164.347	133.874	166.285	189.008	143.386	138.982	117.139	98.6436	134.93	122.6	133.874	148.67	167.518	140.391	117.139	192.531	171.569	177.735	149.551	163.467	141.976	240.972	171.217	163.819	192.179	142.681	160.824	152.722	168.751	154.659
4930598F16Rik	1000	0	0	0	0	0	1.31406	0	0	0	0	0	0	0	0	0	0	0	0	0	0	0	0	0	0	0	0	0	0	0	0
1700063A18Rik	1000	0	0	0	0	0	0	0	0	0	0	0	0	0	0	0	0	0	0	0	0	0	0	0	0	0	0	0	0	0	0
4930533P14Rik	1000	0	0	0	0	0	0	0	0	0	0	0	0	0	0	0	0	0	0	0	0	0	0	0	0	0	0	0	0	0	0
Slco4c1	1000	45.9482	27.9866	61.8212	48.4545	45.1128	40.9357	38.0117	34.2523	36.7586	30.0752	35.0877	26.3158	34.67	43.4419	30.4929	65.1629	55.1378	53.467	49.7076	53.467	46.3659	53.467	51.7962	52.2139	53.8847	33.4169	44.2774	34.67	35.0877	36.7586
Panct2	1000	60.2502	45.9535	57.4419	53.8678	48.5065	45.6982	70.4621	63.3138	50.0383	37.5287	43.1453	42.3794	48.7618	53.1019	34.2099	58.9737	44.4218	50.5489	57.4419	49.5277	55.1442	38.8052	44.1665	63.5691	72.2492	44.677	61.782	43.1453	54.3784	71.9939
Slco6b1	1000	0	0	0	0	0	0	0	0	0	0	0	0	0	0	0	0	0	0	0	0	0	0	0	0	0	0	0	0	0	0
Slco6c1	1000	0.411015	0.82203	0	0	0.411015	0	0.411015	0	0.82203	0.411015	0	0	0.411015	0	0.411015	0.411015	0	0	0	0	0	0	0.82203	0	0.411015	0.411015	0	0	0	0.82203
D1Ertd622e	1000	648.649	824.69	702.703	730.46	649.379	604.456	1077.06	908.327	615.413	633.674	682.615	709.642	731.191	808.985	706.72	814.828	637.692	860.482	907.597	816.654	939.737	848.43	825.055	946.676	1214.76	843.682	775.383	840.029	913.806	1156.68
Ppip5k2	1000	283.046	292.744	310.884	310.884	274.246	236.351	312.5	258.98	252.155	256.645	255.747	258.261	312.141	313.218	259.878	446.3	394.576	422.234	391.882	446.48	387.213	484.016	415.769	412.895	486.71	337.823	355.065	395.295	413.434	385.057
Gin1	1000	160.706	171.485	191.573	207.741	196.962	179.814	136.698	145.517	149.437	160.216	168.055	154.826	190.593	176.384	154.826	186.183	170.015	222.93	184.223	172.954	145.517	216.071	197.452	200.882	220.48	169.525	161.195	190.593	193.533	175.404
Pam	1000	2042.65	2003.17	2193.76	2324.64	1968.56	1818.43	2759.69	2405.07	1897.15	2016.82	1855.47	1832.32	2236.9	2146.72	1801.36	2219.84	2292.96	2402.39	2008.77	2155.74	1660.25	2388.98	2174.26	2344.87	2345.11	1808.43	1939.56	1871.07	1924.69	2092.37
B230216N24Rik	1000	99.3209	126.486	98.472	107.81	117.148	96.7742	292.869	275.891	112.054	134.126	99.3209	78.0985	114.601	105.263	88.2852	101.868	106.112	95.0764	82.343	109.508	84.8896	69.6095	63.6672	99.3209	123.09	73.0051	101.868	81.4941	89.1341	123.09
1810006J02Rik	1000	0	0.592768	0	0	0	0.592768	0	0.592768	0	0	0	0	0	0	0	0	0	0	0	0	0	0	1.18554	0	0	0	0.592768	1.18554	0	0.592768
Slco6d1	1000	0	0	0	0	0.429553	0.429553	0	0	0	0	0	0	0	0	0	0	0	0	0	0	0	0	0	0	0	0	0	0	0	0
Cntnap5b	1000	99.2188	76.5625	107.227	106.641	92.9688	94.5312	38.0859	61.7188	88.2812	51.5625	100.195	133.203	107.422	111.719	89.4531	153.516	151.172	144.141	102.148	137.695	67.3828	149.609	132.227	111.133	111.133	126.562	170.898	132.617	144.336	108.203
Gm20268	1000	0	0	0	0	0	0	0	0	0	0	0	0	0	0	0	0	0	0	0	0	0	0	0	0	0	0	0	0	0	0
Cdh20	1000	195.056	252.015	187.534	257.657	194.25	176.518	285.868	200.161	170.339	295.003	265.18	215.476	185.922	274.584	187.802	270.822	199.355	234.551	256.851	249.597	307.899	315.153	255.239	252.015	382.053	254.702	224.61	219.506	250.403	304.138
Rnf152	1000	28.3738	38.5743	35.4086	71.6379	31.7739	62.4927	117.364	87.2318	29.898	52.8784	48.1885	35.6431	31.4222	46.1953	35.6431	55.5751	32.2429	134.131	85.5903	48.7748	89.8112	124.634	74.3346	138	122.523	121.702	54.1681	39.864	54.2854	104.35
Pign	1000	156.116	154.641	155.526	178.398	151.985	134.425	127.047	119.669	142.393	137.672	134.13	140.475	151.985	150.362	132.064	188.284	190.497	216.467	169.101	199.793	140.475	208.499	206.434	186.808	217.648	164.97	176.627	164.97	179.283	154.05
2310035C23Rik	1000	826.304	726.23	868.664	867.37	767.111	736.774	675.361	618.387	747.133	686.275	674.621	724.75	872.179	780.799	678.875	806.141	785.054	886.977	753.607	777.1	675.361	910.655	836.848	868.849	934.887	656.123	732.149	749.168	757.122	759.341
Tnfrsf11a	1000	29.0721	25.0896	30.0677	26.6826	26.2843	19.9124	64.317	58.3433	26.4835	29.2712	16.7264	19.7133	26.4835	19.1159	20.908	54.5599	52.5687	55.7547	46.7941	63.1223	47.9888	68.8969	57.5468	63.7196	62.3258	41.6169	39.2274	49.9801	46.595	47.9888
Zcchc2	1000	208.164	239.982	258.142	218.67	191.355	205.163	250.038	228.426	208.315	197.959	200.66	194.657	260.093	218.37	193.456	186.252	191.956	219.721	195.558	178.448	189.704	210.566	185.502	235.93	260.693	167.042	174.396	155.936	182.801	170.344
Gm20753	1000	44.0367	33.0275	31.1927	58.7156	42.2018	45.8716	11.0092	25.6881	45.8716	36.6972	29.3578	55.0459	45.8716	23.8532	25.6881	20.1835	23.8532	23.8532	25.6881	23.8532	22.0183	27.5229	42.2018	31.1927	29.3578	25.6881	23.8532	23.8532	38.5321	20.1835
Phlpp1	1000	983.781	1142.37	1087.65	1043.91	1004.75	839.286	859.273	729.358	964.613	963.139	993.938	1126.47	1168.41	1383.19	991.153	1231.65	1059.47	1242.3	1151.87	1215.76	1064.71	1320.77	1201.02	1192.99	1584.04	1310.62	1232.31	1328.96	1476.25	1297.35
Bcl2	1000	88.2657	99.7674	78.0563	86.8441	87.7488	80.7702	138.149	142.285	75.3425	78.5733	73.2747	77.6686	78.8317	79.9948	66.6839	234.686	197.984	222.797	201.473	195.658	175.368	229.646	220.083	223.184	238.046	255.88	296.717	208.71	244.637	222.797
Mir3473f	1000	0	0	0	0	0	0	0	0	0	0	0	0	0	0	0	0	0	0	0	0	0	0	0	0	0	0	0	0	0	0
Kdsr	1000	331.96	355.607	407.56	371.193	324.257	313.866	353.995	317.628	318.524	325.331	356.145	344.858	411.86	351.129	329.989	361.161	319.957	404.515	330.885	350.233	305.446	383.733	355.786	394.482	428.52	338.588	352.741	388.033	398.065	391.258
Vps4b	1000	682.152	681.846	758.252	728.912	654.034	602.384	585.269	546.455	609.108	602.689	634.78	667.482	805.318	734.719	650.367	811.736	778.117	916.87	750	831.601	661.369	885.391	810.208	822.127	951.406	781.785	742.665	812.042	814.487	777.2
Serpinb5	1000	1.16959	0.779727	1.16959	1.94932	0	0.389864	1.16959	0.389864	0.389864	0	0	0	0.389864	0.779727	0.389864	0.389864	0.779727	1.55945	0.389864	2.33918	0.389864	3.11891	0	0.779727	0.779727	0.389864	3.11891	0.389864	0.389864	0.389864
Serpinb12	1000	0	0	0	0	0.576369	0	0	0	0	0.576369	0	0	0	0	0	0	0	0	0	0	0	0	1.15274	0.576369	1.15274	0	0	1.15274	0.576369	0
Serpinb13	1000	0	0	0	0	0	0	0	0	0	0	0	0	0	0	0	0	0	0	0	0	0	0	0	0	0	0	0	1.24456	0	0
Serpinb3a	1000	0	0	0	0	0	0	0	0	0	0	0	0	0	0	0	0	0	0	0	0	0	0	0	0	0	0	0	0	0	0
Serpinb3d	1000	0	0	0	0	0	0	0	0	0	0	0	0	0	0	0	0	0	0	0	0	0	0	0	0	0	0	0	0	0	0
Serpinb3b	1000	0	0	0	0	0	0	0	0	0	0	0	0.612745	0	0	0	0	0	0	0	0	0	0	0	0	0	0	0	0	0	0
Serpinb3c	1000	0	0	0	0	0	0	0	0	0	0.602773	0	0	0	0	0	0	0	0	0	0	0	0	0	0	0	0	0	0	0	0
Serpinb11	1000	0	0	0	0	0	0	0.588582	0	0	0	0	0	0	1.17716	0	0	0	0	4.70865	0	1.76574	0	0.588582	1.17716	4.12007	0.588582	0	4.12007	1.17716	2.94291
Serpinb7	1000	5.82936	1.05988	0.529942	1.58983	1.58983	2.11977	0	0	1.58983	0.529942	0.529942	0.529942	0.529942	0	0	0	0	0	0	0	0.529942	4.23953	0	0.529942	0.529942	0	1.05988	0	0	2.11977
Serpinb2	1000	0	0	0	0	0	0	0	0	0	0.48852	0	0	0	0	0	0	0	0.48852	0	0.48852	0	0	0.97704	0	1.95408	1.46556	0	0.48852	0.48852	0.97704
Serpinb10	1000	0	0	0	0	0.286533	0	0	0	0	0	0	0	0	0	0.286533	0.573066	0.286533	0.286533	0.286533	0	0	0.286533	0.286533	0.286533	0.859599	0	0.286533	0	0.573066	0
Serpinb8	1000	73.2746	44.0863	69.322	57.7683	56.2481	58.3764	197.324	175.737	57.4643	43.7823	63.2411	68.7139	80.2676	82.6999	64.4573	6.99301	6.38492	42.2621	78.1393	11.5537	75.7069	6.38492	18.8507	89.3889	157.191	47.4308	38.6136	6.38492	13.3779	127.698
D830032E09Rik	1000	0	0	0	0	0	0	0	0	0	0	0	0	0	0	0	0	0	0	0	0	0	0	0	0	0	0	0	0	0	0
Cdh7	1000	42.9466	54.578	51.8938	70.9812	43.8413	51.5956	171.19	176.857	46.2273	58.4551	40.5607	35.4906	36.3853	34.5959	39.0695	227.557	229.347	199.225	188.19	215.33	152.699	200.716	166.12	203.996	201.61	155.681	173.576	186.698	184.611	164.629
Cdh19	1000	131.303	188.933	155.861	150.622	132.613	113.621	187.295	134.578	137.852	146.365	143.418	185.003	142.436	211.853	117.551	216.765	202.685	251.801	191.88	250.819	215.455	231.827	215.455	233.464	289.456	204.977	209.234	200.065	232.809	218.402
Dsel	1000	211.695	161.027	200.937	211.348	180.809	175.082	142.808	152.525	174.562	147.84	132.57	175.082	213.951	154.086	157.557	296.894	284.574	301.406	253.167	279.542	183.932	298.109	279.715	289.086	268.437	203.366	254.902	232.691	234.079	215.166
Cntnap5a	1000	194.891	129.502	180.077	188.25	130.779	126.692	108.301	106.258	144.061	82.2478	122.095	178.799	207.663	156.577	129.502	246.743	249.808	209.195	149.17	242.146	119.285	221.456	209.195	194.891	180.077	142.018	156.577	151.469	163.474	148.148
Tsn	1000	1191.18	1192.17	1278.05	1297.47	1166.83	1093.45	1112.87	1075.02	1172.75	1149.72	1183.94	1120.11	1350.44	1304.71	1123.07	1506.09	1383.68	1664.03	1388.94	1520.9	1256.01	1674.23	1523.2	1534.72	1722.61	1230.34	1318.53	1367.88	1408.36	1406.71
Nifk	1000	639.916	595.037	638.332	655.755	599.789	544.879	435.586	416.051	533.263	491.024	640.971	633.58	778.775	681.098	635.692	536.959	475.185	541.183	497.888	531.679	439.81	602.429	559.134	525.343	625.66	473.073	497.36	508.976	511.088	546.99
Clasp1	1000	714.667	671.873	728.889	738.032	654.73	599.238	740.444	668.825	631.238	626.413	585.524	606.476	716.063	634.032	570.667	770.032	762.032	834.667	722.667	775.746	657.27	880	796.063	813.968	931.048	632.508	674.413	652.825	691.937	698.286
2900060B14Rik	1000	0	0	0	0	0	0	0	0	0	0	0	0	0	1.67504	0	1.67504	0	0	0	0	0	0	0	0	0	5.02513	0	0	0	0
Tfcp2l1	1000	36.4617	32.5782	47.8964	43.6893	28.479	40.5609	69.5793	62.3517	36.3538	37.4326	34.52	47.4649	44.7681	48.2201	44.1208	43.2578	57.0658	64.9407	53.8296	51.6721	39.0507	41.7476	40.8846	64.617	93.096	55.2319	82.8479	47.6807	65.0485	67.8533
Gli2	1000	44.7227	47.257	49.6422	44.2755	45.7662	36.5236	38.4615	34.8837	39.6541	50.0894	51.2821	43.9773	58.1395	57.8414	48.3005	43.6792	39.6541	36.9708	36.2254	43.381	34.2874	40.2504	37.8652	44.5736	46.5116	48.7478	37.7162	35.6291	47.257	35.6291
Mir6346	1000	0	0	0	0	0	0	0	0	0	0	0	0	0	0	0	0	0	0	0	0	0	0	0	0	0	0	0	0	0	0
Inhbb	1000	80.376	104.818	91.1868	90.2468	113.514	82.7262	76.3807	82.7262	102.938	88.1316	78.4959	89.3067	94.0071	115.159	72.8555	64.8649	53.819	62.5147	54.2891	65.5699	67.6851	107.873	54.7591	59.4595	61.8096	52.4089	50.5288	48.8837	77.5558	68.6251
Ralb	1000	288.098	348.704	365.393	343.434	328.502	311.814	404.04	299.517	319.28	374.616	315.766	323.671	369.346	350.9	312.253	290.733	233.641	304.787	272.288	274.484	331.137	406.236	272.288	320.158	390.426	288.977	242.863	242.424	279.315	316.206
Tmem185b	1000	191.873	196.82	224.735	207.42	190.813	189.399	198.233	185.512	205.3	189.399	203.887	178.092	224.028	221.908	196.466	242.403	219.081	273.498	226.502	243.11	194.7	291.166	262.191	267.491	297.88	234.982	229.682	245.583	239.929	242.403
3830432H09Rik	1000	0.8285	0	1.657	0.41425	0.8285	1.657	0	1.24275	0.41425	0.8285	0	2.07125	0	0	0.41425	1.657	0.41425	2.4855	1.24275	0.41425	0.8285	1.24275	0.8285	0.8285	1.24275	0.8285	0	2.4855	0	2.4855
Epb4,1l5	1000	46.3465	57.1908	53.576	49.3158	50.7359	52.156	57.0617	47.2502	42.9899	49.0576	41.6989	50.9941	58.3527	60.6765	52.8014	59.3855	74.8774	109.218	55.1252	63.1294	53.0596	69.5843	69.197	89.7237	86.109	74.4901	74.2319	57.9654	76.8138	57.0617
Ptpn4	1000	310.455	262.006	322.142	437.314	262.218	274.331	338.504	267.531	303.442	212.07	193.583	247.556	292.818	300.255	210.795	456.651	442.414	457.714	408.627	423.077	374.628	838.292	388.865	413.727	514.237	347.216	368.678	308.33	412.24	401.827
Tmem177	1000	124.848	143.074	147.631	139.429	126.367	127.886	160.389	132.746	131.835	111.786	138.821	120.292	120.899	128.493	112.697	120.899	125.759	147.023	140.644	132.442	128.493	160.389	142.467	156.136	171.021	122.114	140.34	110.267	102.673	155.225
Cfap221	1000	7.16846	6.37196	5.57547	4.38072	7.56671	7.96495	3.18598	4.77897	7.16846	5.17722	3.58423	15.1334	4.77897	8.76145	5.97372	11.9474	34.2493	20.3106	9.55795	25.0896	7.16846	28.6738	7.16846	29.8686	22.7001	13.9387	21.9036	23.8949	17.5229	15.1334
Sctr	1000	17.6899	17.1696	17.6899	11.4464	22.3725	13.0073	18.7305	12.487	24.974	17.1696	16.129	22.8928	14.0479	20.2914	11.4464	11.4464	30.6972	11.9667	11.9667	20.8117	10.9261	16.129	14.0479	18.2102	22.3725	4.68262	17.1696	22.8928	18.7305	10.4058
Tmem37	1000	26.5487	19.6657	75.7129	39.3314	27.532	43.2645	34.4149	34.4149	52.1141	39.3314	25.5654	27.532	53.0973	28.5152	40.3147	23.5988	16.7158	80.6293	26.5487	39.3314	25.5654	33.4317	77.6794	68.8299	39.3314	66.8633	28.5152	27.532	22.6155	26.5487
Dbi	1000	5953.02	6759.73	7044.3	6119.46	5997.32	5743.62	4734.23	4032.21	6181.21	5848.32	6268.46	6688.59	7316.78	6868.46	6114.09	6510.07	6636.24	9237.58	6299.33	7489.93	5544.97	8269.8	7226.85	8526.17	8095.3	7367.79	6834.9	8084.56	8350.34	6502.01
3110009E18Rik	1000	46.832	28.4665	60.6061	47.7502	39.4858	34.8944	24.7934	30.303	50.5051	48.6685	41.3223	38.5675	51.4233	42.2406	54.1781	63.3609	66.1157	54.1781	47.7502	76.2167	54.1781	68.8705	43.1589	65.1974	60.6061	75.2984	67.034	68.8705	89.9908	57.8512
Steap3	1000	98.8354	80.8939	104.501	97.2616	69.5625	81.8382	101.353	73.3396	86.5596	77.1168	95.373	84.6711	118.036	90.6516	78.3758	55.3982	64.5263	83.0973	60.7491	57.9163	62.9525	79.3201	61.6934	84.3563	88.4482	88.763	86.8744	64.5263	68.6182	70.8215
C1ql2	1000	2966.5	1475	2503	2379.5	1662.5	2264	134	27	1769	1365.5	3285	3746.5	5048.5	2311	3268.5	73	21.5	24.5	27	40.5	61	159	27.5	38	21	57	22.5	52.5	39	26.5
Marco	1000	0	0	7.55668	0	1.00756	1.00756	0	1.00756	21.6625	1.00756	1.00756	0.503778	3.02267	1.00756	1.51134	0	0	5.03778	0	0.503778	0	1.00756	0.503778	0	2.51889	2.01511	0	0	2.51889	0.503778
En1	1000	0.783085	1.56617	3.52388	1.95771	1.95771	0.783085	0	0	5.09005	2.34926	0.391543	0.391543	0	0	0	1.56617	0.391543	1.17463	1.17463	0	0.391543	2.7408	1.95771	1.56617	0.391543	1.95771	0	0	0.391543	0
Celrr	1000	68.3544	64.557	84.8101	76.5823	62.0253	62.6582	60.1266	53.7975	62.6582	60.7595	69.6203	53.1646	82.2785	74.6835	59.4937	77.2152	63.9241	86.7089	65.1899	77.2152	57.5949	56.962	60.7595	54.4304	79.1139	62.6582	62.6582	86.0759	53.1646	72.1519
Insig2	1000	809.685	739.925	779.885	837.453	776.837	758.889	587.877	536.065	730.105	688.791	658.991	684.389	846.597	729.089	657.636	899.424	765.323	970.2	751.101	807.992	748.73	926.177	894.006	895.699	855.063	760.244	757.873	707.078	759.567	773.451
Ccdc93	1000	270.397	277.701	307.194	293.275	258.269	254.272	246.968	201.213	270.535	254.41	240.353	276.874	292.034	279.768	230.843	210.998	207.139	246.003	194.184	197.216	172.96	223.815	209.482	227.122	248.76	180.954	202.729	182.883	199.559	197.767
Htr5b	1000	146.208	136.727	89.8204	147.705	150.2	128.244	17.9641	13.9721	119.261	118.263	103.792	105.289	133.733	159.182	130.24	13.9721	29.9401	6.48703	9.98004	32.4351	56.8862	19.9601	14.4711	28.9421	36.4271	8.48303	22.4551	42.4152	32.4351	32.9341
Ddx18	1000	360.16	414.851	398.844	371.721	354.38	329.924	321.921	290.796	347.265	325.478	336.149	355.714	453.09	405.069	361.049	443.308	453.535	471.321	426.412	453.535	355.269	498.888	444.642	513.562	520.676	391.285	435.749	421.076	413.962	402.401
Dpp10	1000	310.799	389.849	310.583	423.758	351.62	308.207	1746	1694.82	381.641	496.76	359.827	313.391	314.039	428.078	293.952	1210.37	1231.97	1236.07	1211.23	1218.14	1038.44	1625.92	1117.93	1278.4	1555.94	678.618	1098.27	970.626	988.121	1256.16
Actr3	1000	4896.21	4491.62	5227.6	5106.7	4728.7	4404.95	2935.54	2884.56	4308.45	3744.72	4917.7	4796.07	6143.48	5337.95	4987.25	4130.37	3715.95	4458.49	3751.27	4010.56	3245.45	4301.53	4289.15	4292.06	4181.72	3965.04	4128.19	4140.93	4077.2	4085.94
Slc35f5	1000	390.836	390.836	433.577	396.997	371.968	366.192	321.91	313.439	383.519	356.18	341.548	361.956	414.709	403.543	336.542	233.346	234.886	308.818	232.191	232.191	243.358	274.933	256.065	284.559	336.542	234.886	242.588	218.329	202.156	273.777
Gpr39	1000	4.09074	5.95017	3.34697	2.97508	2.97508	4.46263	0.743771	0.371885	5.2064	3.34697	1.48754	1.48754	5.57828	1.48754	3.34697	4.09074	3.34697	5.2064	4.09074	5.57828	2.97508	5.95017	2.6032	2.97508	3.71885	6.32205	2.23131	2.23131	2.23131	3.34697
Lypd1	1000	1527.4	1619.37	1994.13	1979.94	1425.15	1264.19	830.235	920.744	1511.25	1354.21	1267.61	1259.78	1666.83	1418.3	1341	1501.96	1540.61	1649.71	1148.73	1288.65	891.879	1425.64	1349.8	1575.83	1342.47	1043.05	1584.64	1228.96	1446.18	1177.59
Nckap5	1000	46.3585	51.6265	46.0951	51.4948	42.1441	44.7781	28.0522	29.1058	39.6418	40.5637	27.1303	33.3202	37.1395	33.9787	30.9496	27.9205	24.4962	48.9925	26.6035	30.8179	27.262	30.4228	34.6372	48.9925	29.7643	34.1104	24.1011	25.8132	33.0568	21.7305
Mgat5	1000	373.389	349.549	380.799	431.057	363.08	354.381	442.332	416.559	372.101	343.428	286.082	360.825	414.626	410.116	319.588	401.74	397.874	410.438	413.338	406.894	397.874	513.209	403.995	441.688	508.376	433.956	447.809	323.776	450.387	460.696
Tmem163	1000	81.0489	127.93	92.5705	139.452	100.914	104.092	166.468	162.495	92.5705	150.973	84.6246	86.2137	67.938	119.19	71.1164	136.671	106.873	137.465	228.844	127.93	324.99	386.571	149.781	199.046	285.658	152.96	108.86	107.271	133.095	268.574
Acmsd	1000	0.434216	0.434216	17.3686	0	0.868432	0	0	0.434216	9.55276	3.03951	0	0.434216	5.21059	0	3.47373	0	0	3.90795	0.434216	0.434216	0	0	0.868432	0	0.434216	0.434216	0	0	1.30265	0.434216
2900009J06Rik	1000	71.1207	84.0517	96.9828	94.8276	68.9655	101.293	62.5	47.4138	64.6552	81.8966	79.7414	75.431	96.9828	81.8966	73.2759	88.3621	58.1897	58.1897	47.4138	66.8103	73.2759	96.9828	79.7414	86.2069	64.6552	96.9828	84.0517	75.431	81.8966	88.3621
Ccnt2	1000	935.401	844.337	1000.57	1019.07	799.659	795.39	739.044	604.724	798.52	750.711	966.135	906.09	1101.59	1014.51	829.824	735.344	764.656	896.414	702.334	728.799	660.501	782.869	750.142	842.345	954.468	788.845	872.795	878.771	924.303	829.539
Map3k19	1000	43.4451	50.3049	50.5589	42.6829	50.3049	51.0671	36.8394	46.2398	54.1159	42.4289	38.6179	52.5915	60.7215	50.5589	42.4289	49.0346	80.7927	80.7927	55.8943	61.2297	41.1585	77.2358	74.187	102.642	67.8354	78.252	72.4085	74.9492	86.128	56.4024
Rab3gap1	1000	1082.33	1104.21	1157.61	1201.83	1104.45	988.238	1052.22	965.185	1036.46	996.471	1008.94	1040.46	1246.29	1193.13	973.888	1298.05	1158.79	1348.15	1177.13	1260.17	1055.99	1481.3	1298.28	1317.57	1383.2	1086.1	1151.73	1096.45	1181.84	1245.35
Zranb3	1000	120.586	134.991	142.193	146.375	133.829	123.141	97.3513	82.0167	118.262	108.504	96.1896	107.342	149.861	135.223	110.595	96.1896	90.8457	100.604	94.7955	105.483	90.381	100.604	101.069	114.545	105.948	70.632	78.2993	82.4814	88.29	86.8959
R3hdm1	1000	1993.14	2287.41	2248.34	2316.29	2139.24	1869.29	3476.93	2919.78	1833.54	2092.27	2188.07	1983.79	2463.63	2298	2062.14	1755.4	1623.86	1757.07	1949.5	1606.4	2040.11	1643.6	1492.31	2012.68	2529.72	1793.85	1945.55	1777.85	1817.54	2510.6
Mir128-1	1000	128.571	214.286	257.143	185.714	214.286	85.7143	200	271.429	128.571	100	85.7143	114.286	314.286	85.7143	214.286	214.286	185.714	214.286	171.429	200	114.286	200	114.286	185.714	214.286	242.857	142.857	171.429	300	214.286
Ubxn4	1000	974.346	1012.46	1090.15	1074.76	979.233	938.431	761.788	710.237	924.261	919.13	952.602	1029.07	1164.43	1070.36	937.454	945.028	872.221	1183.73	886.88	938.187	832.885	1081.85	1004.4	1093.33	1127.05	900.318	871.977	899.585	919.13	875.153
Lct	1000	508.271	296.464	560.655	478.917	373.986	422.965	12.4878	9.08206	336.847	175.316	610.12	715.537	1045.73	583.198	777.652	2.75705	1.29744	1.45962	1.78398	1.6218	5.83847	2.10834	0.973078	2.59488	2.59488	2.75705	5.02757	4.37885	1.45962	7.62245
Mcm6	1000	287.487	212.685	298.173	254.395	228.887	234.057	108.583	110.651	212.685	170.976	295.415	359.186	457.773	243.709	299.552	93.7608	121.337	143.054	107.204	118.925	93.4161	138.573	108.583	146.501	159.945	98.5867	132.713	117.201	127.887	113.409
Dars	1000	1178.96	1141.09	1164.21	1215.23	1098.05	1045.83	762.854	707.453	1086.49	968.115	1023.12	1037.07	1288.96	1106.42	1017.14	1098.84	1031.49	1247.91	1084.1	1121.96	880.43	1251.1	1180.95	1271.02	1290.95	991.232	1013.55	1106.42	1110.4	1088.88
Cxcr4	1000	73.8699	49.0628	62.2933	56.2293	67.2547	70.011	20.3969	23.7045	61.1907	53.473	45.7552	78.8313	67.2547	74.4212	59.5369	31.9735	117.971	42.4476	53.473	88.2029	41.8964	59.5369	54.0243	78.8313	88.2029	39.6913	94.8181	89.8567	81.5877	49.0628
Thsd7b	1000	91.9559	80.4414	77.4028	87.478	87.7979	90.6765	25.7476	31.0251	75.9635	70.6861	70.5261	83.4799	86.0387	87.1582	63.1697	18.0713	16.1522	45.738	38.7014	21.7496	42.2197	20.1503	24.4683	50.6957	39.0213	38.5415	32.6243	17.1118	17.9114	35.8228
Cd55b	1000	1.51057	0	0.755287	0.755287	0	0	0	0	0.755287	0.755287	0	0	3.02115	0	0.755287	0.755287	0.755287	8.30816	0.755287	0	0.755287	0	0.755287	0.755287	0	0	0.755287	0.755287	0	0
Cd55	1000	74.0301	89.0736	80.3642	71.2589	89.4695	135.788	53.0483	72.0507	79.1766	74.426	66.5083	90.2613	94.2201	103.325	72.0507	55.4236	53.0483	264.45	51.8606	69.2795	58.5907	62.5495	155.186	218.527	86.6983	188.44	87.886	62.1536	98.1789	82.3436
Zp3r	1000	0	1.47493	1.47493	0.491642	3.93314	1.47493	0.491642	0.491642	1.47493	0.983284	0.491642	0.491642	0.983284	2.94985	2.45821	8.35792	5.89971	9.83284	2.94985	5.89971	3.93314	6.88299	10.8161	8.84956	7.37463	8.84956	7.86627	4.91642	6.39135	7.37463
C4bp	1000	30.8019	18.5874	173.128	11.1524	26.5534	21.2427	1.06213	1.06213	228.359	36.6437	9.02815	31.333	157.196	12.7456	99.8407	0.531067	2.65534	34.5194	0	2.12427	0.531067	0	0.531067	10.6213	10.6213	6.90388	1.06213	3.71747	5.31067	4.24854
C4bp-ps1	1000	18.5676	17.2414	22.5464	17.2414	18.5676	30.504	11.9363	23.8727	13.2626	25.1989	26.5252	23.8727	27.8515	19.8939	19.8939	9.28382	9.28382	7.95756	7.95756	18.5676	9.28382	5.30504	18.5676	9.28382	11.9363	10.6101	11.9363	10.6101	10.6101	21.2202
Pfkfb2	1000	337.595	346.638	370.959	364.723	335.1	332.19	334.269	303.607	296.851	318.054	353.186	360.254	431.972	396.528	342.064	335.308	295.707	408.17	308.284	318.054	292.069	349.964	336.036	390.188	421.058	365.139	371.375	372.415	389.564	365.555
Yod1	1000	169.323	137.444	171.152	176.901	156.519	126.209	113.405	102.169	138.228	108.963	133.786	151.032	194.669	148.419	124.902	181.343	178.207	183.172	149.464	180.82	125.163	197.021	166.449	169.062	179.775	140.057	146.067	159.655	169.585	149.203
AA986860	1000	38.5012	51.5641	39.8762	37.1262	43.6576	36.7824	49.5015	34.7198	33.6886	45.3764	39.1887	43.6576	41.2513	42.9701	34.7198	55.3455	63.5957	74.2523	48.814	60.5019	64.627	64.9708	63.252	57.0643	78.7212	70.1272	64.9708	68.7521	74.5961	67.0333
Fcamr	1000	0	1.56986	0	0	0	0.523286	0	0	0	0	0	1.56986	0.523286	0.523286	0	0	0	0.523286	0	0	0	0	0.523286	0	0	0	0	0	0	0
Pigr	1000	0.519615	11.1717	256.43	0.519615	6.755	2.07846	1.03923	0.519615	268.381	58.4567	6.755	23.6425	171.473	15.5885	143.674	0.259808	4.41673	89.3739	0.259808	3.3775	0.519615	1.81865	0.259808	6.49519	24.6817	18.4463	4.93635	6.755	11.6913	9.61289
Fcmr	1000	0.670691	0.670691	3.35345	0.670691	1.34138	2.68276	2.01207	0	1.34138	0.670691	0	0.670691	1.34138	0	1.34138	1.34138	1.34138	8.04829	0	0	2.01207	0	4.02414	6.03622	5.36553	12.0724	2.01207	0	0	1.34138
Il24	1000	0	0	0	0	0	0	0	0	0	0	0	0.896057	0	0	0	0	0	0	0	0	0	0	0	0	0	0	0	0	0	0
Il20	1000	0	0	0	0	0	0	0	0	0	0	0	0	0	0	0	0	0	0	0	0	0	0	0	0	0	0	0	0	0	0
Il19	1000	1.95503	0	0.977517	0	0	0.977517	0	0	0.977517	0	0	1.95503	0	0	0	0.977517	0	0	0	0	0.977517	0	0	0	0	0.977517	0	0	0	1.95503
Il10	1000	0	0	0	0	0	0	0	0	0	0	0.765697	0	0	0	0	0	0	0	0	0	0	0	0	0	0	0	0	0	0	0
Mapkapk2	1000	543.825	602.259	652.902	631.866	559.408	534.866	622.517	550.058	566.81	567.978	505.649	574.99	617.452	566.03	509.155	440.592	375.146	622.906	443.319	458.901	477.211	614.725	530.58	615.894	626.802	497.857	405.532	361.122	427.737	481.885
Dyrk3	1000	314.672	324.324	382.722	364.865	352.799	281.853	180.985	142.375	305.019	231.66	301.641	290.541	386.583	318.05	314.672	70.4633	72.3938	103.282	85.4247	97.4903	93.1467	111.004	73.3591	121.139	100.386	73.3591	92.1815	80.1158	85.4247	103.764
Eif2d	1000	706.55	681.659	825.328	754.148	636.681	624.454	635.371	574.236	606.114	603.93	650.655	673.799	794.76	675.983	637.555	484.279	427.511	603.493	451.528	447.598	424.891	517.904	465.066	583.843	658.952	467.686	471.616	492.576	544.541	490.83
Rassf5	1000	256.388	319.53	278.12	268.429	257.269	239.354	400	383.554	254.038	274.89	260.206	246.109	266.373	288.106	219.383	121.88	80.7636	95.1542	191.777	103.377	247.283	202.349	100.734	185.022	294.86	157.709	151.542	87.2247	112.775	312.482
Ikbke	1000	22.1667	22.7911	31.5329	24.9766	24.3522	19.9813	14.3615	17.7958	21.8545	29.6597	23.1033	24.3522	25.9132	17.7958	18.108	17.7958	24.04	25.601	19.9813	29.3475	14.6737	23.4155	20.9179	27.4742	30.9085	29.3475	24.04	29.0353	33.7184	15.6104
Srgap2	1000	560.199	585.075	576.866	583.831	568.657	502.239	500	527.488	538.433	526.866	533.706	540.174	545.025	612.065	502.985	594.776	596.891	642.289	530.224	579.726	514.055	665.672	568.284	636.692	714.179	522.139	604.478	562.562	607.96	565.796
Fam72a	1000	29.4537	29.9287	28.9786	27.0784	21.8527	28.9786	23.753	21.8527	28.9786	24.228	29.9287	28.0285	27.0784	25.6532	22.8029	29.4537	21.3777	30.8789	27.5534	24.7031	34.2043	30.8789	29.4537	23.753	35.6295	29.9287	15.2019	23.753	30.4038	22.3278
Avpr1b	1000	8.4378	5.78592	10.1254	6.027	7.71456	6.50916	0.24108	0	5.06268	6.26808	13.0183	9.40212	8.67888	11.0897	9.88428	0	0.72324	0.24108	0.24108	0.24108	0	0.24108	0.72324	0.24108	0.72324	0.24108	1.44648	0.48216	0.24108	0.24108
Ctse	1000	0	0	0	1.41509	0	0.943396	0.943396	0.943396	0.471698	2.35849	0.943396	0.471698	0.943396	0.943396	0.471698	2.35849	0.943396	0.943396	0	1.41509	0	2.35849	3.77358	0.471698	2.83019	0.943396	0	0	0	0.471698
Rab7b	1000	16.2505	25.763	20.6104	18.6286	15.8541	17.8359	20.214	19.025	18.2323	21.4031	17.4396	11.8906	19.4213	19.4213	27.3484	40.0317	39.239	46.7697	27.7447	39.6354	28.1411	41.6171	42.0135	45.5807	46.3734	40.8244	38.0499	50.3369	49.5442	36.4645
Slc26a9	1000	2.1978	1.92308	1.0989	1.92308	1.64835	0.824176	1.37363	0.824176	1.37363	1.37363	1.0989	1.0989	0.824176	0.274725	1.92308	2.47253	0.824176	1.0989	1.0989	3.02198	0.824176	1.0989	0.549451	2.74725	2.74725	0.549451	0	0.824176	0.549451	0.549451
Pm20d1	1000	31.9209	31.6384	68.6441	37.0056	29.9435	38.7006	27.4011	26.8362	56.7797	51.6949	34.7458	46.6102	66.6667	42.3729	47.4576	22.0339	24.8588	82.2034	18.0791	22.0339	23.1638	29.3785	37.2881	43.2203	54.2373	57.3446	27.9661	18.0791	34.1808	33.0508
Slc41a1	1000	873.203	873.418	949.153	914.396	776.014	797.468	625.402	561.467	789.745	819.996	842.523	881.356	1013.52	957.091	850.247	941.214	803.476	1051.71	856.254	841.45	737.825	985.411	1067.37	989.487	1082.6	1305.94	1215.4	1101.48	1229.99	1040.12
Rab29	1000	161.209	172.124	162.049	154.492	150.294	142.737	108.312	115.869	159.53	156.171	157.011	148.615	134.341	143.577	95.7179	101.595	117.548	156.171	118.388	118.388	114.19	152.813	135.181	186.398	130.982	112.51	115.029	114.19	115.029	109.152
Nucks1	1000	1519.69	1521.98	1713.58	1669.29	1495.73	1385.66	1229.66	1170.93	1452.26	1335.3	1271.49	1343.01	1690.45	1493.27	1426.02	1847.44	1632.87	1929.3	1677.17	1907.97	1447.67	1810.7	1806.92	1802.99	1971.62	1436.02	1630.91	1667.98	1735.4	1706.69
Slc45a3	1000	14.6299	42.4555	28.6862	24.957	25.5307	14.6299	20.3672	16.0643	20.0803	29.5468	12.9088	18.0723	11.4745	16.638	13.1956	58.8067	60.5278	76.5921	47.619	61.1015	49.9139	101.549	73.1497	57.3723	60.8147	37.292	24.3832	36.7183	51.0614	26.965
Elk4	1000	144.375	171.615	167.802	159.63	146.826	141.106	134.568	110.597	128.031	122.582	115.772	138.927	161.809	167.802	147.916	151.73	159.357	174.339	155.816	169.164	130.755	169.436	141.651	157.723	176.519	143.558	156.361	143.285	158.268	153.364
Mfsd4	1000	794.972	751.494	1065.32	905.007	834.741	718.113	574.902	482.588	738.924	592.211	737.482	697.919	1118.28	783.639	947.043	57.2842	43.0661	66.7628	196.785	61.1993	253.658	124.047	57.4902	173.501	311.354	109.005	106.532	43.2722	60.169	287.245
Cdk18	1000	329.613	541.037	431.057	391.989	393.959	330.269	617.203	624.097	404.793	527.249	297.439	351.937	260.67	432.042	305.647	443.533	332.239	411.359	438.936	406.106	516.415	654.301	414.642	479.974	717.991	478.004	413.986	426.461	469.468	562.377
Lemd1	1000	5.08647	9.15565	30.5188	10.1729	8.13835	6.10376	56.9685	47.8128	4.06918	21.3632	19.3286	9.15565	7.12106	7.12106	6.10376	13.2248	9.15565	14.2421	14.2421	25.4323	11.1902	9.15565	10.1729	16.2767	20.3459	19.3286	12.2075	16.2767	21.3632	25.4323
Mir135b	1000	0	10.3093	0	0	10.3093	0	0	0	0	20.6186	10.3093	0	0	0	0	0	0	0	0	0	0	0	0	0	0	0	0	0	0	0
Klhdc8a	1000	52.9398	89.4823	86.2029	87.8426	89.9508	66.2919	178.262	149.215	66.2919	125.791	85.5001	60.9042	50.1288	80.1124	67.4631	143.359	64.1836	84.0946	98.1494	115.249	125.556	293.277	109.393	88.0768	106.348	139.845	66.2919	81.9864	137.503	108.456
Nuak2	1000	32.2478	18.1992	26.1814	34.802	30.9706	28.7356	14.3678	14.0485	25.5428	22.9885	23.3078	24.2656	20.7535	30.6513	18.1992	19.4764	15.0064	27.1392	8.93997	22.0307	14.3678	23.3078	23.6271	30.3321	14.3678	20.4342	23.3078	16.6028	21.3921	16.6028
Tmcc2	1000	3786.8	3618.77	3781.52	3920.23	3422.29	3446.92	3258.36	2825.81	3270.67	3128.74	3418.77	3384.46	4053.67	3514.66	2946.92	3472.73	3138.71	3563.64	3104.11	3339	2908.8	3907.33	3328.15	3321.11	3709.68	3290.91	3481.52	3497.36	3852.79	3197.65
Dstyk	1000	646.515	656.695	676.429	718.872	613.469	589.977	527.643	465.309	607.048	588.724	607.361	636.805	726.86	742.052	613.156	896.163	877.839	965.074	730.305	888.645	637.745	947.22	854.659	865.623	922.944	728.426	804.072	818.011	867.815	717.15
Rbbp5	1000	957.324	838.381	1019.82	999.174	813.326	802.588	716.134	625	818.557	706.222	867.291	946.586	1137.67	904.46	837.83	917.952	888.491	1000.28	893.172	882.434	794.328	1011.01	912.72	940.804	1059.47	722.467	848.018	864.262	858.48	846.09
Tmem81	1000	156.716	164.753	171.068	176.234	165.901	121.699	126.292	97.589	122.847	148.68	163.031	168.197	182.549	175.66	183.123	173.364	159.013	202.067	194.03	204.363	151.55	200.918	166.475	161.309	221.584	156.142	165.901	211.251	191.734	173.938
Cntn2	1000	690.299	1459.15	824.227	843.734	1009.54	670.267	995.281	798.741	831.358	1100.79	867.96	1018.35	740.325	1396.85	904.248	1570.01	1308.02	1663.24	1465.23	1583.64	1603.57	1830.83	1488.31	1566.86	2198.53	1538.44	1385.32	1544.63	1758.15	1462.82
Nfasc	1000	1506.41	2092.21	1637.54	1674.25	1708.16	1459.49	1510.84	1358.22	1431.26	1735.91	1542.06	1762.79	1623.37	2271.9	1629.54	1780.61	1519.13	1969.55	1583	1661.53	1709.7	2065.32	1766.36	1876.58	2555.74	1903.65	1705.75	1666.25	1860.87	1855.67
Gm10538	1000	0	0	0	0	0	0	0	0	0	0	0	0	0	0	0	0	0	0	0	0	0	0	0	0	0	0	0	0	0	0
Lrrn2	1000	3543.93	3231.02	3639.27	3716.98	3547.22	3355.35	1404.36	1447.4	3181.71	2747.16	3211	3436.04	4477.29	3899.58	3783.32	1993.72	1841	2045.73	1780.04	1876.27	1554.69	2352.96	2012.55	2021.22	2002.09	1769.58	2031.08	2069.93	2194.56	2052.6
Mdm4	1000	822.274	856.269	928.338	911.749	811.123	766.93	747.348	641.828	742.725	751.428	816.426	791.406	979.875	893.935	780.392	909.709	853.549	1026.11	762.034	916.644	740.141	918.956	812.347	957.438	1072.34	794.942	841.583	928.882	949.823	758.227
Pik3c2b	1000	157.523	262.58	198.512	194.098	207.592	166.73	185.269	152.226	180.477	203.43	221.087	269.643	223.357	322.109	225.249	518.224	497.036	526.044	387.439	450.877	317.695	481.776	460.588	456.552	516.837	543.7	580.401	583.176	682.305	415.185
Ppp1r15b	1000	537.402	618.826	602.362	555.297	556.371	515.39	512.527	469.041	515.211	519.327	538.475	547.423	609.878	648.175	510.916	744.631	714.746	840.551	653.722	738.726	603.078	808.339	727.452	757.695	846.815	692.734	709.914	731.747	765.39	696.135
Plekha6	1000	634.974	699.209	760.493	751.375	677.752	618.345	1004.69	930.267	634.035	687.542	606.946	622.502	651.737	648.116	531.983	886.818	864.02	910.286	765.992	803.674	709.266	1014.35	835.054	937.24	1040.36	811.721	885.209	836.529	969.022	912.029
Gm19461	1000	5.46272	4.17738	5.78406	11.5681	6.1054	4.49871	7.06941	3.5347	2.89203	7.39075	5.14139	9.6401	4.49871	5.14139	3.5347	20.8869	9.96144	13.1748	6.42674	16.3882	8.67609	75.1928	13.1748	15.1028	10.2828	29.2416	12.2108	10.9254	22.4936	9.96144
Golt1a	1000	3.80022	2.17155	8.14332	2.71444	1.08578	1.62866	15.2009	13.5722	8.68621	3.25733	1.62866	2.17155	13.0293	2.17155	6.51466	1.08578	0.542888	0.542888	2.17155	2.17155	2.17155	2.17155	2.17155	4.34311	8.14332	4.34311	3.25733	2.17155	2.17155	13.5722
Kiss1	1000	2.01613	4.03226	2.01613	6.04839	8.06452	2.01613	36.2903	32.2581	4.03226	2.01613	2.01613	0	4.03226	0	6.04839	6.04839	4.03226	16.129	4.03226	6.04839	20.1613	12.0968	2.01613	6.04839	8.06452	22.1774	16.129	24.1935	10.0806	18.1452
Ren2	1000	0	0	0	0	0	0	0	0	0	0	0	0	0	0	0	0	0	0	0	0	0	0	0	0	0	0	0	0	0	0
Ren1	1000	0	0	0	0	0	0	0	0	0	0	0	0	0	0	0	0	0	0	0	0	0	0	0	0	0	0	0	0	0	0
Etnk2	1000	31.1404	33.7719	115.789	25.8772	35.0877	42.9825	188.158	157.456	82.4561	43.8596	33.3333	37.2807	76.3158	22.807	53.5088	22.807	24.1228	88.1579	45.614	23.2456	46.9298	41.2281	35.5263	71.0526	59.2105	61.8421	32.8947	24.5614	35.9649	79.8246
Sox13	1000	85.245	107.901	90.6259	114.132	95.1572	87.2274	122.062	90.0595	76.1824	91.1923	87.5106	97.4228	95.1572	108.185	77.8816	99.4053	116.964	147.833	92.3251	112.433	86.9442	156.046	129.992	135.372	125.743	135.372	127.159	133.673	135.939	106.769
Snrpe	1000	1191.06	1329.27	1333.33	1321.14	1276.42	1243.9	1325.2	1099.59	1245.93	1270.33	1384.15	1278.46	1473.58	1353.66	1276.42	1467.48	1369.92	1607.72	1485.77	1465.45	1126.02	1512.2	1337.4	1548.78	1670.73	1191.06	1467.48	1412.6	1542.68	1445.12
Zc3h11a	1000	1637.87	1641.9	1796.78	1823.86	1495.3	1502.01	1312.89	1176.81	1453.67	1474.71	1720.23	1607.65	1935.09	1633.39	1517.23	1858.1	1844.9	2098.25	1673.68	1758.73	1479.19	1884.96	1765.22	1951.66	2238.59	1727.62	2030.21	1946.51	1946.06	1720.9
Zbed6	1000	506.691	393.649	560.815	482.724	402.037	431.995	348.912	277.611	432.794	317.555	454.164	398.842	624.725	473.737	379.069	591.172	744.957	726.183	465.349	608.348	383.263	553.425	502.097	584.582	723.986	527.661	640.104	600.959	673.257	490.913
Lax1	1000	2.53058	1.26529	2.10881	2.95234	2.95234	0.843526	10.1223	14.3399	3.3741	2.53058	3.3741	2.95234	2.10881	1.68705	0	1.26529	2.53058	2.10881	5.90468	3.79587	5.48292	2.95234	1.26529	5.06116	8.0135	4.63939	2.10881	3.3741	0.421763	3.79587
Atp2b4	1000	620.598	448.143	511.336	508.804	449.228	397.733	1776.65	1977.57	590.328	625.06	369.151	471.177	498.191	379.884	246.141	609.383	676.194	609.624	959.479	650.868	868.427	619.633	489.629	1128.44	1306.32	646.165	845.876	453.449	486.131	1126.51
Mir6903	1000	0	0	0	0	0	0	0	0	11.3636	0	0	0	0	0	0	0	0	0	0	0	0	0	0	0	0	0	0	0	0	0
Optc	1000	3.85914	7.71828	6.2711	6.7535	5.78871	5.30632	10.1302	8.68307	8.68307	10.6126	6.2711	6.2711	6.7535	9.16546	6.2711	6.2711	4.82393	5.30632	6.2711	6.7535	5.78871	9.64785	4.82393	5.30632	12.0598	7.23589	8.20068	5.30632	7.23589	4.82393
Prelp	1000	404.498	455.025	466.408	415.88	390.894	615.214	234.87	190.45	370.35	511.105	327.596	498.612	492.504	436.979	326.208	200.722	376.18	953.359	257.912	324.264	212.382	303.165	571.072	884.509	494.448	733.759	376.18	312.882	406.996	239.034
Fmod	1000	51.0668	59.8111	109.829	164.043	32.5289	132.914	350.822	277.37	32.5289	167.191	47.9189	44.0714	58.7618	50.717	29.0311	25.8832	30.0804	83.5957	18.538	21.3361	33.9279	31.4795	43.022	72.4029	36.3764	96.5373	30.0804	16.0895	27.2823	44.7709
Btg2	1000	328.252	249.108	307.817	305.871	229.971	247.486	152.449	142.394	226.078	178.398	270.516	255.271	328.9	310.736	249.757	192.345	171.91	145.962	114.175	153.422	161.207	120.013	103.795	143.691	155.693	175.154	145.313	113.85	114.823	227.052
Chit1	1000	3.24149	4.32199	3.78174	1.0805	3.78174	2.16099	4.32199	2.16099	1.62075	5.94273	1.62075	1.0805	2.70124	1.62075	1.0805	9.72447	20.5294	21.0697	9.72447	15.6672	3.78174	19.4489	11.3452	14.0465	13.5062	2.16099	5.40249	11.8855	11.3452	5.40249
Chil1	1000	185.909	199.526	229.722	216.696	183.541	203.079	259.325	210.776	152.753	187.685	232.682	208.999	243.339	248.668	180.58	278.271	214.328	310.243	253.996	243.931	238.603	319.124	293.665	329.781	327.413	287.744	266.43	273.535	309.651	329.781
Mybph	1000	1.64024	4.37397	2.73373	2.73373	6.01422	2.18699	5.46747	2.73373	3.82723	7.65446	3.28048	2.18699	2.73373	3.28048	2.18699	14.2154	11.4817	23.5101	10.9349	13.1219	12.5752	13.1219	15.8557	15.3089	15.8557	20.2296	18.0426	22.4166	22.4166	16.9492
Adora1	1000	2537.72	2486.34	2585.32	2537.38	2325.49	2276.16	1719.88	1490.46	2280.63	2263.28	2547.17	2679.84	3038.84	2964.26	2415.19	1560.41	1556.11	1761.3	1823.85	1586.01	1794.98	1844.99	1678.98	1939.68	2372.74	1684.83	1923.7	1579.82	1741.54	2279.26
Myog	1000	6.08108	1.35135	1.35135	2.7027	6.08108	3.37838	0	0	3.37838	10.1351	1.35135	5.40541	5.40541	1.35135	6.08108	0.675676	2.02703	0.675676	0.675676	0.675676	0	0.675676	1.35135	0.675676	6.08108	2.02703	0.675676	1.35135	0.675676	0.675676
Ppfia4	1000	1266.03	1144.22	1369.21	1251.52	1128.73	1132.69	538.981	440.251	1011.7	1155.93	1212.3	1271.47	1481.95	1246.74	1124.94	851.657	828.581	882.644	657.491	824.131	624.032	924.18	806.659	825.614	806.164	788.363	816.219	891.709	938.85	706.61
Tmem183a	1000	940.991	943.2	1037.87	983.275	917.955	863.679	828.337	798.675	910.066	846.955	900.6	855.159	1024.61	892.395	814.768	971.915	976.333	1113.6	945.093	986.747	873.462	1066.58	1041.65	1099.4	1163.77	834.333	915.746	842.853	848.217	944.462
4933406M09Rik	1000	0	1.12994	0	1.12994	0	0	0	0	0	0	0	0	0	0	0.564972	0	0	0	0	0	0	0	0	0	0	0.564972	0	0	0	0
Cyb5r1	1000	594.096	704.797	734.317	730.627	640.836	643.296	424.969	421.279	638.991	636.531	562.116	533.825	639.606	660.517	514.145	495.695	452.645	543.665	488.315	486.47	425.584	570.726	507.38	555.966	618.696	436.654	396.679	387.454	391.759	453.26
Adipor1	1000	879.35	1048.72	973.608	962.297	893.561	891.531	902.552	816.995	891.241	923.144	910.673	928.074	1024.36	1013.05	853.828	1185.61	1091.07	1519.14	1127.32	1175.17	1075.12	1344.55	1335.56	1441.71	1449.83	1415.31	1210.27	1155.16	1259.86	1216.94
Klhl12	1000	687.109	697.121	761.89	700.25	685.857	656.133	582.916	579.474	668.648	638.298	653.63	647.372	781.915	744.368	638.924	611.702	587.922	663.955	586.358	573.529	566.333	679.599	583.855	661.452	729.036	504.38	608.26	488.736	531.915	663.642
Rabif	1000	575.804	612.557	621.746	624.298	584.992	569.168	600.817	604.9	589.587	555.896	587.545	531.394	622.256	624.809	591.118	664.114	633.997	702.91	671.771	626.85	642.164	743.236	664.114	759.571	745.789	563.553	590.607	507.402	592.649	721.286
Mgat4e	1000	0.545852	5.45852	1.0917	2.18341	0	0	0.545852	1.0917	0	2.72926	2.18341	0.545852	1.63755	1.0917	0	0	0	0.545852	0	0	0	0	0	0	0	0	0.545852	0	0	0
Kdm5b	1000	599.683	589.683	699.365	636.349	567.46	528.571	468.571	437.619	556.984	540.476	551.905	557.778	707.937	605.238	533.492	742.381	739.365	810.317	657.778	705.714	530.317	798.73	736.825	730	731.905	562.857	662.54	683.968	703.016	588.889
Syt2	1000	124.335	274.07	168.34	196.102	206.734	150.916	388.659	195.806	172.77	289.132	197.578	172.77	127.584	269.935	201.122	582.989	289.132	351.152	406.084	427.348	538.689	678.382	505.316	400.177	582.398	720.614	536.326	600.709	724.158	744.832
Ppp1r12b	1000	356.508	269.523	353.274	362.49	285.691	319.806	279.871	284.398	295.554	254.325	247.211	337.268	406.306	316.087	239.289	311.237	314.632	304.446	291.835	295.554	245.109	314.309	283.751	300.081	366.047	236.055	296.847	225.222	262.086	303.314
Ube2t	1000	39.7176	22.0653	36.1871	36.1871	38.835	36.1871	33.5393	36.1871	23.8305	29.1262	27.361	24.7132	44.1306	35.3045	36.1871	50.3089	61.7829	32.6567	30.8914	55.6046	29.1262	52.9568	37.9523	57.3698	53.8394	27.361	30.8914	32.6567	16.7696	34.4219
Lgr6	1000	27.3254	10.4885	15.4568	26.7734	16.2848	16.8369	38.09	26.2214	20.7011	22.3572	20.4251	22.3572	24.2893	20.4251	14.9048	11.0406	10.2125	8.28043	18.493	14.3527	23.7372	27.8774	9.6605	15.1808	20.7011	10.2125	11.5926	12.4206	20.149	23.4612
Ptprv	1000	3.78289	4.44079	1.80921	3.94737	2.96053	2.30263	4.76974	8.88158	4.76974	4.76974	2.30263	1.48026	1.97368	2.79605	2.30263	267.928	194.243	253.289	158.717	211.349	161.02	162.336	197.204	212.664	228.125	514.309	529.112	559.704	650.658	348.355
Ptpn7	1000	0.919118	0.612745	0	0.306373	0.306373	0.919118	1.22549	0.919118	0	0.919118	0.919118	2.14461	0.306373	1.22549	0.306373	84.2525	57.598	86.7034	47.4877	69.2402	53.3088	57.9044	85.4779	69.2402	56.0662	168.199	177.083	159.007	174.02	119.485
Arl8a	1000	4625.15	5094.01	5294.95	4928.32	4704.47	4243.24	5475.91	4849	4370.74	4525.26	4517.63	4636.9	5372.5	4946.53	4458.28	4594.01	4151	4845.48	4716.22	4462.4	4821.39	5536.43	4707.4	5188.01	5889.54	4264.98	4598.12	4643.95	4758.52	5461.81
Gpr37l1	1000	3419.44	3822.9	4162.45	3840.21	3355.97	3355.08	3450.95	2541.06	3438.53	3868.18	4380.38	4122.5	4619.62	4275.63	4002.66	3678.65	3243.23	3545.05	3465.16	3499.78	3395.47	4419	3683.09	3645.36	4915.22	3803.37	3936.97	3838.44	4291.61	4089.66
Elf3	1000	0	1.5	0.5	0.5	2	2.5	0.5	1.5	1	0.5	0.5	1	1	3.5	2	1	1.5	4	0.5	1	2	1.5	2.5	8.5	1.5	4.5	0	2	2	0
Rnpep	1000	930.03	953.498	1074.32	1049.54	902.651	877.879	886.571	761.408	858.757	925.684	836.158	873.968	946.11	890.917	752.282	1239.03	1245.98	1375.92	1153.85	1257.71	1034.33	1233.81	1231.2	1332.03	1361.15	965.667	1072.58	974.794	989.135	974.359
Timm17a	1000	1846.24	1913.85	1980.37	2002.18	1933.48	1862.6	1936.75	1621.59	1857.14	1804.8	1925.85	1749.18	2087.24	1960.74	1804.8	2253	2091.6	2516.9	2133.04	2189.75	1947.66	2600.87	2329.33	2550.71	2461.29	2175.57	2050.16	1940.02	2010.91	2344.6
Lmod1	1000	6.08828	6.59564	4.56621	8.87874	5.07357	4.31253	13.9523	11.4155	4.56621	6.34196	4.81989	5.58092	11.9229	4.81989	3.04414	5.8346	7.10299	5.07357	7.10299	8.62506	5.8346	10.4008	5.8346	6.84932	8.11771	9.13242	7.10299	7.86403	11.6692	10.1471
Shisa4	1000	2662.18	3160.5	2800	2748.74	2636.97	2379.83	4324.37	4020.17	2813.45	3194.12	2903.36	2781.51	2901.68	3016.81	2604.2	1992.44	1731.09	2361.34	2671.43	2089.92	2915.97	2489.92	2063.03	2809.24	4048.74	2592.44	2531.09	2310.92	2563.03	3774.79
Ipo9	1000	1323.77	1333.71	1445.48	1503.05	1337.24	1224.18	1396.41	1260.58	1246.79	1243.59	1289.45	1297.63	1615.14	1482.36	1307.25	1146.89	1046.34	1261.71	1184.89	1087.56	1123.8	1319.11	1174.63	1261.06	1440.83	1034.32	1069.6	1001.6	1099.58	1278.86
Nav1	1000	760.633	732.592	794.313	794.078	782.408	654.422	502.624	519.934	683.951	631.785	637.268	700.556	849.377	719.355	663.664	361.557	377.066	367.353	320.905	357.014	332.341	423.827	326.232	403.697	484.295	346.988	394.533	357.327	420.537	398.371
Mir1231	1000	0	0	0	0	0	0	0	0	0	0	0	0	0	0	0	0	0	0	0	0	0	0	0	0	0	0	0	0	0	0
Csrp1	1000	5090.4	9266.67	5877.4	5642.94	6220.9	4705.08	6754.24	5079.1	5412.99	6799.44	6542.94	7498.87	6414.12	9126.55	7357.63	9653.11	7730.51	10491	8847.46	9762.71	9884.18	11209.6	9392.66	9772.32	13904	10686.4	9416.95	10713	12235	10268.4
Phlda3	1000	321.745	558.964	396.046	415.133	409.68	381.05	904.567	661.213	421.95	559.646	505.794	492.161	460.804	608.725	464.213	633.947	462.849	640.082	635.992	537.832	694.615	847.989	605.999	715.065	854.806	762.781	555.556	695.297	669.393	862.986
Tnni1	1000	88.8689	252.244	113.106	146.32	172.352	91.5619	172.352	114.901	131.059	210.054	90.6643	136.445	83.4829	210.952	141.831	281.867	285.458	379.713	272.89	296.23	307.899	358.169	324.057	312.388	484.74	270.197	240.575	314.183	333.932	291.741
Lad1	1000	24.7326	45.1203	40.7754	43.4492	35.0936	26.4037	45.1203	44.7861	36.0963	50.4679	42.4465	33.7567	28.0749	31.4171	24.0642	52.4733	50.8021	58.8235	41.1096	48.4626	45.4545	63.5027	47.4599	49.7995	64.1711	30.0802	33.7567	40.107	36.0963	29.0775
Tnnt2	1000	51.1182	46.3259	62.3003	61.5016	34.345	55.1118	390.575	380.99	52.7157	204.473	109.425	59.9042	47.1246	71.885	67.8914	263.578	313.898	353.035	216.454	279.553	184.505	305.112	289.137	286.741	310.703	133.387	180.511	139.776	111.022	162.939
Pkp1	1000	0	0.222916	0.668747	0.222916	0.222916	0.445831	2.8979	1.78333	0.222916	0.891663	0	0.222916	0.222916	0.891663	0.222916	0.445831	0.222916	0.222916	2.8979	0.668747	8.69371	0	0.222916	3.56665	2.00624	6.68747	0.891663	0.222916	0	21.3999
Igfn1	1000	5.11338	10.1156	8.55936	4.55758	3.89062	35.1267	286.683	182.859	13.0058	19.3419	10.5602	6.44731	5.55803	10.1156	5.11338	3.22365	3.44598	125.834	18.3415	5.89151	18.8973	3.22365	32.1254	85.4824	41.4629	64.0285	14.7843	2.55669	6.55847	41.4629
Tmem9	1000	1426.29	1326.29	1533.14	1414.29	1305.14	1308.57	1166.86	1054.29	1265.14	1268	1377.71	1373.71	1557.14	1402.29	1235.43	1202.29	1117.14	1619.43	1269.71	1163.43	1120	1424.57	1392	1522.86	1326.29	1132	992	972	1026.29	1120
Ascl5	1000	3.52734	7.05467	5.29101	14.1093	8.81834	5.29101	49.3827	19.4004	3.52734	10.582	3.52734	0	10.582	3.52734	10.582	3.52734	3.52734	8.81834	10.582	8.81834	5.29101	17.6367	19.4004	8.81834	26.455	3.52734	10.582	5.29101	8.81834	15.873
Cacna1s	1000	3.99361	4.47284	2.71565	3.67412	2.8754	3.83387	6.23003	7.34824	4.3131	3.67412	2.71565	3.03514	3.03514	5.11182	3.83387	5.43131	6.70927	7.02875	6.23003	7.66773	6.07029	11.5016	3.99361	8.14696	11.0224	6.23003	9.10543	8.6262	8.6262	6.07029
Gm15850	1000	11.811	11.811	13.7795	9.84252	7.87402	9.84252	11.811	25.5906	7.87402	7.87402	0	5.90551	15.748	11.811	21.6535	19.685	7.87402	3.93701	9.84252	3.93701	11.811	3.93701	3.93701	13.7795	9.84252	7.87402	0	3.93701	9.84252	17.7165
Kif21b	1000	499.616	711.262	607.961	575.721	633.293	537.888	838.25	747.67	487.224	559.272	502.358	505.209	553.679	680.118	505.867	416.493	419.564	443.799	464.415	429.323	512.337	457.177	356.947	474.394	645.356	423.511	445.334	441.167	492.927	573.308
5730559C18Rik	1000	48.1248	58.4135	68.0385	53.1032	51.7756	48.7886	44.1421	41.155	53.767	49.4524	43.1464	61.7325	49.7843	60.073	42.8145	36.5085	33.5214	58.7454	29.2068	37.1723	43.4783	43.1464	43.8102	57.7498	48.4567	44.4739	33.1895	38.8317	38.4998	45.1377
Gpr25	1000	176.02	201.02	208.163	207.143	189.796	168.878	207.143	179.592	157.143	192.857	170.408	164.286	236.735	189.286	189.286	205.612	186.735	194.898	192.857	195.918	188.776	215.816	193.367	210.204	257.653	176.02	191.837	240.816	241.837	229.592
Camsap2	1000	1397.03	1334.65	1454.17	1422.73	1331.71	1207.08	1130.13	1056.76	1264.73	1121.95	1137.67	1215.65	1457.11	1380.67	1130	1310.24	1260.51	1354.72	1231.75	1266.78	1055.61	1450.72	1340.02	1357.15	1490.22	1052.54	1216.8	1122.84	1163.88	1272.02
9230116N13Rik	1000	9.53743	10.4912	16.6905	15.2599	10.968	6.6762	10.0143	9.06056	11.9218	10.4912	6.19933	4.76872	5.72246	7.62995	6.6762	19.5517	17.1674	19.0749	9.53743	15.7368	16.2136	15.2599	13.8293	12.8755	13.3524	8.10682	11.4449	16.2136	13.3524	8.10682
Ddx59	1000	147.217	181.777	188.959	164.273	179.533	165.619	120.287	143.627	149.91	161.58	136.894	130.61	162.926	158.438	142.729	245.512	187.612	250.898	196.589	218.582	190.305	232.496	253.142	198.833	241.023	197.487	178.636	238.33	224.417	186.715
Kif14	1000	2.15879	2.51859	2.75846	2.03886	1.43919	2.03886	3.23819	2.87839	2.15879	2.99832	1.55913	1.43919	2.39866	2.63852	2.51859	2.51859	6.23651	4.43751	2.27872	3.11825	1.67906	4.55745	3.71792	3.95778	5.63684	2.51859	4.31758	5.75678	4.07772	3.35812
Zfp281	1000	539.526	517.536	584.834	533.46	526.066	482.844	432.986	358.294	498.199	423.697	464.076	511.09	627.488	575.735	459.905	517.156	535.924	554.123	457.251	507.109	444.171	546.351	484.55	526.635	615.545	478.104	507.109	510.521	536.682	511.09
Gm19705	1000	26.5849	85.8896	51.1247	44.9898	47.0348	26.5849	69.5297	49.0798	47.0348	53.1697	40.8998	34.7648	47.0348	47.0348	28.6299	32.7198	36.8098	63.3947	73.6196	32.7198	73.6196	28.6299	40.8998	59.3047	38.8548	53.1697	42.9448	51.1247	49.0798	69.5297
Platr22	1000	2.50209	0	1.66806	0	1.66806	1.66806	1.66806	0.834028	0.834028	2.50209	0	0.834028	0.834028	2.50209	1.66806	0.834028	5.00417	20.0167	0.834028	1.66806	0.834028	0.834028	7.50626	9.17431	2.50209	7.50626	1.66806	3.33611	8.34028	1.66806
Nr5a2	1000	0.259269	1.03708	8.2966	0.518538	0.777807	0.259269	0	0	12.7042	2.59269	0.259269	1.81488	5.44465	0.777807	4.66684	1.81488	1.81488	2.85196	0.259269	1.55561	0.518538	0.777807	1.03708	2.85196	0.518538	0.777807	0.777807	2.33342	2.07415	0.259269
Mir181a-1	1000	0	0	0	11.4943	11.4943	0	0	0	0	0	0	22.9885	0	0	0	0	0	0	0	0	0	0	0	11.4943	0	0	0	0	22.9885	0
Mir181b-1	1000	50	50	37.5	50	25	25	0	37.5	37.5	25	50	0	25	62.5	12.5	37.5	62.5	0	12.5	50	25	0	0	50	62.5	12.5	12.5	25	37.5	25
Ptprc	1000	29.1211	30.18	37.9456	36.1807	31.4155	28.5916	33.7098	30.533	32.2979	31.7684	30.533	30.533	33.5334	32.4744	25.9442	36.5337	36.1807	41.652	36.8867	39.1811	40.593	53.6534	41.652	39.887	53.6534	40.593	36.5337	35.2983	33.3569	36.8867
Atp6v1g3	1000	2.11977	0	0	0.529942	0	1.58983	0	0	0	0	0	0	0	0	0	0	0	0	0	0	0	0	0	0	0	0	0	0	0	0
Nek7	1000	696.673	851.159	724.896	805.11	769.459	652.109	735.888	630.125	709.447	726.084	617.35	697.564	694.593	819.37	574.272	836.898	756.982	1009.8	854.724	909.982	950.683	1009.21	903.446	937.314	1311.65	835.71	704.1	680.927	776.589	917.112
Gm5833	1000	0	0	0	0	0	0	0	0	0	0.518135	0	0	0	0	0	0	0	0	0	0	0	0	0	0	0	0	0	0	0	0
Lhx9	1000	231.304	132.174	180.522	221.913	174.609	188.348	4.52174	2.08696	169.565	125.739	112	138.087	129.391	103.826	95.4783	1.56522	0.695652	1.21739	0.869565	1.3913	29.7391	49.2174	1.3913	3.47826	1.73913	3.65217	1.3913	1.3913	3.30435	1.3913
2310009B15Rik	1000	539.405	507.881	637.478	528.897	483.363	546.41	357.268	325.744	495.622	460.595	509.632	458.844	647.986	490.368	514.886	439.58	432.574	525.394	436.077	472.855	383.538	569.177	507.881	446.585	462.347	427.32	471.103	476.357	402.802	430.823
Dennd1b	1000	107.542	92.626	100.325	117.647	93.7086	95.6333	83.7243	72.0558	85.2881	92.5057	109.708	101.648	114.519	105.738	81.559	105.377	107.542	118.85	106.219	119.331	101.407	126.428	111.272	122.098	139.901	108.384	110.429	103.452	106.099	110.911
4930596I21Rik	1000	6.52174	8.69565	2.17391	10.8696	10.8696	4.34783	6.52174	8.69565	2.17391	2.17391	2.17391	6.52174	8.69565	0	4.34783	0	4.34783	17.3913	10.8696	0	6.52174	6.52174	0	4.34783	10.8696	0	2.17391	6.52174	4.34783	6.52174
Crb1	1000	5.31689	8.93237	5.52956	5.74224	6.59294	5.31689	5.31689	10.4211	7.23097	3.61548	4.89154	4.25351	7.01829	10.2084	6.16759	13.1859	15.5253	11.0591	8.08167	14.0366	5.31689	14.2493	7.23097	10.4211	14.4619	6.38026	13.3986	14.8873	16.5887	5.95491
4933436E23Rik	1000	0	0	0	0	0	0	0	0	0	0	0	0	0	0	0	0.90009	0	0	0	0	0	0	0	0	0	0	0	0	0	0
Zbtb41	1000	180.34	171.012	198.756	192.059	165.989	160.488	145.061	124.611	167.065	140.995	156.9	169.935	190.505	178.426	153.313	198.756	208.084	227.936	175.317	219.923	172.327	214.183	187.395	207.965	240.014	172.327	185.243	175.197	174.121	188.591
Aspm	1000	2.4326	2.73667	2.02716	1.52037	2.12852	1.72309	2.53395	4.3584	2.33124	1.01358	1.52037	1.52037	2.83803	4.05433	2.12852	8.10866	17.6363	10.0345	11.1494	13.9874	3.75025	13.0752	9.73039	11.8589	15.5078	3.1421	12.8725	11.5548	13.582	6.68964
F13b	1000	0	3.36417	66.4424	0	1.26156	0	0	0	91.2532	8.41043	0	5.46678	40.7906	4.62574	26.9134	0	1.68209	16.4003	0.420521	0	0	0	0	0.420521	5.04626	5.04626	0	2.10261	2.52313	0.841043
Cfhr1	1000	0	5.1963	56.582	0	0.577367	0	0	0	80.8314	8.66051	0.577367	2.88684	63.5104	2.88684	31.7552	0	0	15.0115	0	1.15473	0	0	0	3.4642	2.30947	2.88684	0.577367	1.15473	0.577367	1.7321
Gm4788	1000	0	4.15656	53.689	0.34638	1.7319	0	0.34638	0.34638	71.008	6.23485	0	5.88847	46.7613	2.07828	31.5206	0	0.692761	16.6263	0	0.34638	0.34638	0.34638	0.34638	2.77104	3.4638	2.42466	0.692761	0.34638	1.7319	0.692761
Cfhr2	1000	0	9.3633	163.546	1.24844	9.3633	0	1.87266	1.87266	232.834	51.186	3.74532	25.593	202.871	8.73908	95.5056	1.24844	3.1211	51.8102	0	1.24844	1.87266	0.62422	0	6.86642	18.7266	15.6055	5.61798	6.2422	7.49064	3.1211
Cfh	1000	178.236	214.204	405.04	378.236	175.258	271.249	361.283	291.18	370.447	249.026	157.617	193.585	309.966	205.04	216.037	249.026	236.884	405.727	209.164	256.816	210.309	293.242	347.537	324.628	370.218	383.963	294.616	188.316	262.085	296.678
Kcnt2	1000	347.233	254.233	368.461	332.322	299.469	265.605	337.63	327.774	289.361	226.687	302.755	301.491	424.059	341.42	279.757	135.456	127.369	137.478	191.054	107.152	199.646	108.163	122.315	171.595	264.342	130.402	153.399	112.206	114.481	233.258
4930590L20Rik	1000	0	0	0	0	0	0	0	0	0	0	0	0	0	0	0	0	0	0	0	0	0	0	0	0	0	0	0	0	0	0
Cdc73	1000	330.844	294.996	361.837	370.799	301.718	277.446	249.066	244.212	319.642	261.389	276.699	363.704	396.938	327.11	291.636	419.716	409.634	451.083	382.001	380.881	304.705	460.045	456.684	429.425	470.5	367.812	392.084	360.717	428.305	365.571
B3galt2	1000	558.541	454.347	466.798	531.892	479.904	388.161	471.385	539.1	467.89	381.389	442.551	459.808	590.651	484.273	378.331	168.633	154.216	181.957	364.57	175.623	337.265	261.249	135.867	321.538	512.014	206.64	239.406	116.208	124.727	471.603
Glrx2	1000	764.343	757.373	796.783	786.059	702.949	712.064	680.161	625.737	660.858	692.493	747.721	750.938	815.818	769.705	662.466	624.129	563.271	684.718	616.622	603.217	604.826	683.914	622.252	687.936	827.614	607.775	649.062	629.491	673.458	753.887
Trove2	1000	404.128	395.413	427.638	451.147	372.936	362.615	362.844	325.459	360.206	338.876	344.381	358.716	410.092	418.922	338.647	499.083	471.101	528.211	440.367	491.743	409.289	579.243	470.528	501.261	576.261	408.83	440.482	411.583	441.284	443.693
Uchl5	1000	751.486	806.051	813.074	797.947	775.257	692.599	867.099	845.489	734.198	680.713	755.808	690.438	838.466	744.462	602.917	690.978	543.49	695.84	706.105	640.735	720.692	826.04	660.184	721.232	847.65	562.939	534.306	539.168	540.249	819.557
Rgs2	1000	407.444	487.87	468.927	439.681	409.771	413.094	657.694	619.807	417.747	410.103	486.54	465.936	556.331	552.011	488.867	2152.87	2305.42	2346.63	1532.74	2091.72	1239.95	1944.17	1969.43	1907.94	1630.77	2129.61	2122.3	2075.77	2087.07	1983.72
Rgs13	1000	27.3881	44.0882	33.4001	41.4162	39.4122	21.3761	15.3641	29.3921	30.7281	16.7001	24.7161	34.0681	38.7442	21.3761	40.7482	19.3721	11.356	14.6961	19.3721	16.7001	10.688	12.6921	21.3761	16.7001	20.7081	4.67602	6.68003	2.67201	2.67201	11.356
Rgs1	1000	7.5188	1.50376	11.2782	4.51128	3.00752	3.00752	5.26316	2.25564	2.25564	3.7594	3.00752	1.50376	3.7594	6.76692	3.00752	3.7594	4.51128	6.01504	4.51128	1.50376	4.51128	6.76692	6.01504	4.51128	16.5414	7.5188	5.26316	3.7594	4.51128	6.01504
Rgs21	1000	0	1.20919	0	0	0	0	0	0	0	0	0	0	0	0	0	0	0	2.41838	0	0	0	0	0	0	0	0	0	0	0	0
Rgs18	1000	0.537924	1.61377	0	2.15169	1.07585	3.22754	3.76547	3.22754	3.22754	1.07585	0.537924	0	2.15169	0.537924	1.07585	1.61377	1.61377	1.07585	0	0.537924	0.537924	1.07585	1.61377	1.61377	1.61377	0	0.537924	0	0	0
Brinp3	1000	202.711	226.356	213.43	253.468	212.484	179.067	307.692	259.458	197.037	187.579	199.559	196.091	164.25	191.992	160.467	386.507	392.182	350.567	430.958	392.182	402.9	458.701	366.015	402.9	459.647	198.613	213.115	255.359	234.868	317.781
Pla2g4a	1000	43.92	78.0072	62.6024	53.7529	59.9803	42.609	54.0806	47.1976	52.7696	54.4084	37.6926	48.5087	42.9367	54.0806	28.1875	104.556	103.573	124.549	95.3786	127.171	105.211	119.305	113.078	113.733	122.583	89.1511	77.0239	92.101	84.2347	65.88
Mir7652	1000	0	0	0	0	0	0	0	0	0	0	0	0	0	25.641	0	0	0	0	0	0	0	0	0	0	0	0	0	0	0	0
Ptgs2os	1000	13.3601	6.68003	17.0341	12.358	12.024	10.354	19.3721	10.354	10.02	5.67802	15.0301	15.3641	20.3741	15.6981	14.3621	0.668003	3.00601	1.67001	6.68003	1.33601	4.67602	3.00601	0.668003	5.67802	5.34402	4.00802	5.01002	2.00401	1.33601	11.022
Ptgs2	1000	379.011	191.315	231.604	246.321	224.367	280.579	150.543	126.417	258.142	189.626	357.057	390.109	436.912	410.856	299.638	43.1846	50.9047	41.2545	61.7612	46.3209	54.5235	40.772	44.1496	63.9324	73.8239	43.1846	68.0338	22.9192	19.3004	89.7467
Ptgs2os2	1000	13.7536	5.15759	13.7536	13.1805	14.3266	15.4728	14.3266	4.01146	13.7536	2.86533	9.16905	8.59599	14.3266	5.73066	6.30372	0.573066	0.573066	1.14613	1.14613	0	2.29226	1.7192	2.29226	2.29226	1.7192	1.14613	0.573066	1.14613	1.14613	2.86533
Pdc	1000	0	0	0.801925	0	0	0	0	0	0	0	0	0	0	0	0	0	0	0	0	0	0	0	0	0	0	0	0	0	0	0
2310030A07Rik	1000	0	1.63934	0	0	0	0	0	0	0	0	1.63934	0	1.63934	0	0	0	0	0	3.27869	0	0	0	0	0	0	0	0	0	0	0
BC003331	1000	914.25	879.087	970.08	929.981	855.645	884.948	661.32	595.62	826.342	778.532	908.698	941.394	1100.25	915.484	851.018	854.102	696.484	949.105	778.532	841.456	685.379	918.877	865.824	856.262	991.98	802.591	826.959	783.775	821.715	846.7
Tpr	1000	851.788	764.106	853.907	896.954	768.344	727.285	624.768	585.563	737.881	684.371	689.139	776.159	923.444	793.245	669.139	996.159	953.907	1099.74	903.444	993.113	734.967	1100.93	1021.06	1041.19	1043.58	788.477	874.834	864.503	883.046	834.834
Prg4	1000	7.01262	19.4016	31.0893	19.8691	8.18139	15.8953	128.799	77.8401	21.5054	39.5044	9.58392	12.8565	22.6741	15.6615	20.8041	5.84385	5.37634	7.71388	9.58392	3.27256	8.6489	14.9603	7.94764	6.54511	10.7527	25.0117	9.81767	3.74007	4.67508	7.71388
Hmcn1	1000	9.71934	8.46347	9.99236	9.61013	8.84569	8.9549	9.55553	8.51807	6.06094	7.153	6.60697	6.27935	7.86284	9.66474	5.51491	7.69903	6.33395	6.38856	3.76761	6.93459	6.71617	9.50093	6.77078	6.55236	7.04379	9.88315	9.82855	5.51491	8.24506	8.02665
C730036E19Rik	1000	0	0.378788	6.06061	0	0	0	2.65152	0	16.6667	1.89394	0.757576	0.757576	12.1212	1.51515	13.6364	5.30303	1.89394	3.78788	1.89394	3.40909	1.51515	1.13636	2.65152	3.0303	4.54545	4.16667	4.16667	4.92424	6.81818	1.51515
Ivns1abp	1000	1095.69	1237.05	1264.84	1213.02	1063.73	1008.93	1297.4	1295.61	1102.04	1029.18	1151.88	1193.57	1328.77	1255.31	1080.41	4409.37	3600.56	4020.25	3616.84	4111.97	3104.63	3835.62	4095.1	3591.62	3779.83	4346.83	4718.88	4695.26	4874.73	3745.88
Swt1	1000	135.224	141.494	154.853	125.682	106.325	122.41	114.504	79.88	126.227	117.503	122.683	147.219	163.304	141.767	122.137	176.39	177.754	218.648	146.129	170.393	119.956	187.568	164.667	172.846	207.47	154.308	172.574	177.208	191.112	148.582
Trmt1l	1000	542.964	579.737	596.998	622.889	504.69	515.197	489.306	431.52	497.561	489.306	582.364	567.73	668.668	626.642	560.6	580.863	644.278	693.433	544.465	551.97	483.677	632.27	650.657	663.039	680.675	588.743	603.752	599.625	609.006	537.711
Mir7682	1000	137.931	34.4828	86.2069	103.448	103.448	103.448	0	68.9655	51.7241	68.9655	103.448	86.2069	86.2069	120.69	68.9655	51.7241	34.4828	51.7241	0	34.4828	68.9655	86.2069	34.4828	86.2069	86.2069	51.7241	86.2069	120.69	103.448	0
Rnf2	1000	702.774	706.407	780.713	782.365	651.585	621.532	442.867	456.737	680.647	596.433	719.287	665.786	851.387	790.621	707.067	566.05	495.707	558.785	511.559	530.713	450.132	586.196	535.997	551.519	597.754	409.181	492.734	461.691	472.259	472.919
Fam129a	1000	25.1333	26.4026	20.0559	26.1488	22.5946	19.0404	38.0807	26.4026	19.2942	26.4026	18.5326	20.5636	20.5636	25.8949	18.5326	14.9784	17.2633	41.6349	28.4336	17.5171	26.4026	15.74	23.1023	51.5359	38.3346	32.2417	19.0404	14.7245	22.3407	34.5265
Edem3	1000	474.561	443.216	501.211	531.042	423.531	407.329	372.199	347.365	438.371	377.498	430.497	456.996	538.007	506.814	405.512	489.098	450.03	508.631	433.525	452.15	367.959	540.127	481.224	491.369	544.821	406.42	438.371	413.84	427.922	426.408
1700025G04Rik	1000	646.812	582.633	688.436	693.049	565.512	558.745	537.216	510.252	602.625	526.656	483.904	551.364	621.489	544.495	445.663	335.965	312.59	318.331	355.136	329.916	320.176	373.488	305.208	352.061	459.709	261.021	316.896	263.789	298.749	401.989
Tsen15	1000	728.799	755.3	814.488	794.17	673.145	702.297	638.693	614.841	636.926	636.042	718.198	704.064	839.223	682.862	652.827	583.922	562.721	589.223	584.806	583.922	569.788	740.283	582.155	670.495	727.915	446.996	442.58	519.435	564.488	678.445
Colgalt2	1000	98.1262	100.838	127.712	125	102.811	82.5937	92.7022	103.057	99.1124	83.5799	71.499	65.8284	118.343	92.7022	79.6351	61.144	83.5799	83.3333	74.211	82.5937	73.2249	78.8955	75.1972	78.6489	104.29	64.1026	64.1026	57.4458	75.1972	83.5799
Rgl1	1000	1496.53	1292.51	1506.56	1453.05	1356.32	1262.67	1134.04	1064.32	1300.23	1140.73	1281.45	1400.05	1546.18	1432.21	1193.72	1141.24	1126.83	1100.59	1000.77	1184.46	874.196	1153.07	1086.44	1105.74	1110.88	968.356	1108.05	1089.79	1037.82	1082.84
Apobec4	1000	0	0	0	0	0	0.63857	0	0	0	0	0	1.91571	1.27714	0	0	0	0.63857	0	1.27714	1.27714	0	0	0.63857	0	1.27714	1.91571	0	3.19285	1.27714	0
Arpc5	1000	4081.71	3867.16	4231.95	4083.29	4024.78	3617.82	1784.4	1778.07	3581.97	3397.47	4017.92	4021.61	5257.78	4843.96	4381.66	2482.34	2265.16	2530.84	2217.19	2381.13	2183.97	2534	2471.27	2577.23	2684.24	1990.51	2266.21	2112.28	2140.75	2207.7
Ncf2	1000	50.077	64.3297	53.9291	66.641	54.3143	55.8552	58.9368	57.0108	64.3297	48.151	60.4777	65.4854	58.5516	70.8783	53.9291	83.5901	55.0847	82.0493	68.9522	68.1818	74.7304	92.8351	80.8937	69.3374	111.325	93.2203	77.4268	67.0262	76.6564	72.0339
Smg7	1000	892.898	869.501	985.665	980.886	788.763	782.501	799.638	761.905	791.728	782.501	872.302	921.569	1093.43	948.921	895.04	803.757	767.837	887.461	787.939	744.274	713.462	934.75	815.456	899.819	1021.91	754.16	870.984	813.973	873.29	871.972
Nmnat2	1000	1962.19	1797.7	2049.75	2107.67	1810.97	1686.71	1973.69	1816.49	1780.9	1784.66	1728.5	1757.24	2030.73	1897.41	1714.13	1426.49	1234.58	1351.09	1508.73	1308.87	1466.5	1872.65	1317.05	1541.68	1808.76	1397.97	1525.54	1336.94	1445.06	1873.31
Lamc2	1000	28.079	33.6948	39.5043	37.5678	18.2029	24.5933	200.232	147.947	21.6886	72.8118	24.3997	11.4253	12.5871	20.5267	6.0031	56.9326	58.4818	67.7769	75.5229	65.8404	68.5515	63.7103	63.7103	71.0689	93.7258	40.0852	47.0565	36.9868	45.8947	74.361
Lamc1	1000	255.97	257.544	297.035	295.723	233.928	240.488	231.435	194.962	240.75	245.474	213.199	253.214	308.843	278.798	243.506	342.692	306.088	385.332	288.638	313.435	258.462	346.891	361.191	353.057	376.542	326.03	343.479	329.31	348.203	305.825
E330020D12Rik	1000	4.59851	3.18359	2.47612	1.76866	1.76866	2.12239	3.53732	3.18359	0.353732	2.82985	2.12239	5.65971	3.18359	3.89105	1.76866	6.01344	2.82985	4.24478	4.95225	4.24478	4.95225	4.59851	4.59851	3.18359	5.65971	9.55076	4.59851	4.24478	7.07464	5.30598
Shcbp1l	1000	72.8606	58.6797	79.2176	69.4377	72.3716	63.0807	41.5648	38.1418	46.4548	39.6088	69.9267	77.2616	93.3985	61.6137	72.8606	47.4328	39.6088	54.2787	38.6308	49.8778	28.8509	45.9658	49.3888	52.3227	58.6797	61.1247	65.5257	101.222	87.0416	64.5477
Dhx9	1000	1567.09	1300.89	1542.81	1607.85	1439.41	1305.01	1060.48	1030.13	1357.25	1128.12	1316.06	1363.75	1751.14	1415.56	1263.82	1580.53	1533.71	1696.08	1414.05	1626.49	1108.39	1722.96	1579.45	1585.52	1642.75	1330.59	1469.11	1489.05	1516.58	1349.23
Npl	1000	104.063	83.3927	105.488	104.063	79.1162	78.4034	101.212	72.7014	84.1055	80.5417	93.3713	83.3927	110.478	86.9565	81.9672	191.019	146.828	176.051	150.392	153.956	121.169	186.743	164.647	152.53	198.86	193.87	238.061	228.795	236.636	214.54
Rgs8	1000	1070.12	986.389	1035.49	1085.29	920.227	966.919	643.349	608.718	925.741	838.904	1003.62	1077.02	1168.33	1090.97	970.193	2493.11	2339.77	2498.79	1918.16	2367.51	1680.39	2646.97	2569.09	2261.2	2080.29	2081.5	2347.69	2174.19	2247.76	1809.1
C230024C17Rik	1000	0	0	0	0	0	0	0.599341	0	0	0	0.899011	0	0	0.899011	0.29967	0.599341	0.29967	0.29967	0.29967	0.29967	0.599341	0	0	0	0.29967	0	0	0.599341	0.899011	1.49835
Rgs16	1000	74.9465	126.767	101.071	273.662	92.0771	132.334	171.734	129.764	115.203	148.18	100.214	94.2184	172.591	130.193	123.769	59.9572	61.242	74.0899	87.7944	71.0921	166.595	647.537	59.5289	101.499	148.608	96.3597	108.779	65.5246	119.914	150.321
Rnasel	1000	117.276	104.245	117.907	113.493	103.825	98.1505	205.338	176.755	95.6284	138.293	98.1505	85.9605	104.035	95.6284	78.6045	60.5296	68.7264	81.5469	93.1063	65.7839	92.4758	71.6688	58.8483	99.6217	160.151	48.1295	81.5469	58.4279	65.1534	102.354
Rgsl1	1000	23.3516	35.989	29.1209	37.9121	27.1978	30.7692	55.2198	51.0989	32.6923	53.8462	26.6484	28.2967	28.2967	40.1099	28.5714	32.967	33.5165	37.3626	38.4615	32.6923	39.5604	28.5714	20.6044	38.1868	64.8352	20.3297	24.1758	22.5275	24.7253	30.7692
Teddm2	1000	29.6252	28.416	25.9976	33.2527	24.1838	31.4389	45.3446	22.37	20.5562	35.0665	17.5333	16.3241	29.0206	21.1608	22.9746	29.6252	24.1838	28.416	39.9033	28.416	50.786	27.2068	23.5792	42.9262	53.2044	13.3011	17.5333	15.1149	22.37	32.0435
Teddm1b	1000	0	0	0	0	0	0	0	0.395726	0	0	0	0	0	0	0.395726	1.18718	0.395726	1.5829	0.791452	1.97863	0.395726	1.18718	0.395726	0.791452	1.18718	0	0.395726	0.395726	0.791452	0
Teddm1a	1000	1.41343	0	0	0	0	0	0	0	0	0	0	0	0	0	0	0	0	0	0	0	0	0.706714	0	0	0	0	0	0	0	0
Mir8114	1000	0	0	0	0	0	0	0	0	0	0	0	0	0	0	0	0	9.00901	0	0	0	9.00901	0	9.00901	0	27.027	0	0	0	0	0
Glul	1000	20086.9	21839	23838.3	21798.4	18776.6	19575.3	22846.8	17306	19479.9	20502	26000.7	24148.2	29274	27769.5	22785.5	20660.1	17293.6	22025.3	19816.2	19992.9	21183.1	21416.8	19096.9	22482	28969	26669.8	25647	24435.3	28289.6	29435.7
Zfp648	1000	5.86042	4.79489	4.79489	9.05701	0.532765	4.26212	17.0485	7.99148	4.26212	6.92595	4.79489	3.19659	1.5983	4.26212	2.13106	3.72936	4.79489	2.66383	6.39318	3.19659	1.5983	1.06553	4.79489	1.5983	4.26212	2.66383	1.5983	0	2.66383	2.66383
4930452N14Rik	1000	0	0	1.63132	1.63132	4.89396	0	1.63132	0	1.63132	0	1.63132	3.26264	0	0	1.63132	6.52529	9.78793	3.26264	3.26264	3.26264	1.63132	3.26264	4.89396	4.89396	1.63132	0	6.52529	13.0506	4.89396	1.63132
4930532M18Rik	1000	2.079	0	0	2.079	0	0	0	0	2.079	0	0	0	0	0	0	0	0	0	0	0	0	0	0	2.079	0	0	0	0	0	0
Cacna1e	1000	1990.79	1415.69	1917.85	1852.01	1601.09	1576.36	804.048	817.91	1474.6	1141.84	1419.47	1618.1	2307.87	1608.25	1583.44	1205.48	1326.61	1252.5	1010.63	1153.19	832.244	1009.61	1008.58	1166.5	1273.21	1148.7	1536.11	1351.26	1459.71	1171.77
Ier5	1000	566.055	678.593	685.627	693.272	596.942	616.82	1344.04	948.624	556.881	669.725	885.321	723.242	824.771	850.459	732.722	895.107	814.067	949.541	1101.22	839.755	986.544	817.125	864.526	1133.64	1219.57	1036.09	1056.27	979.205	1044.04	1709.79
Mr1	1000	99.6413	101.634	135.911	123.555	101.634	153.448	144.281	113.193	111.997	103.228	89.6772	102.033	113.591	100.04	89.6772	108.808	123.157	292.547	100.04	115.982	97.6485	116.78	220.407	253.089	173.774	220.407	109.605	107.613	109.207	94.4599
Stx6	1000	1832.86	1861.73	2132.57	1997.56	1784.06	1701.1	1572.59	1277.76	1668.16	1602.28	1886.54	1805.61	2409.92	2045.55	1939	2007.32	1789.75	2095.57	1928.83	1915.82	1692.96	2056.12	2059.37	1941.03	2045.55	1848.31	1914.6	1921.92	2028.47	1886.95
Xpr1	1000	1146.78	944.844	1220.89	1230.69	900.405	939.746	798.196	742.909	958.175	792.053	845.118	990.851	1088.35	874.003	786.695	1141.94	1034.24	1241.8	1093.84	1111.1	919.488	1212	1105.35	1218.14	1297.35	1064.57	1146.65	1032.94	1119.33	1124.95
Gm5532	1000	1.1422	2.28441	1.1422	1.71331	3.42661	8.56653	3.99772	1.1422	2.85551	1.71331	1.1422	0.571102	1.71331	1.71331	0	4.56882	3.99772	3.99772	7.99543	3.99772	2.28441	12.5642	1.71331	6.28212	6.85323	4.56882	2.28441	5.71102	3.42661	2.85551
Acbd6	1000	784.758	799.176	935.118	869.207	777.549	708.033	852.729	724.511	769.825	758.496	761.071	773.944	945.417	855.304	716.272	926.88	895.469	992.276	992.276	937.178	830.072	1106.59	935.118	1013.9	1026.78	797.116	791.452	837.281	933.574	932.029
Lhx4	1000	1.0805	0.540249	1.62075	0.540249	1.0805	1.62075	0	1.62075	0	0	2.16099	0.540249	0	0	0	0	0	0.540249	1.0805	1.62075	0.540249	0	0	0.540249	0.540249	6.48298	0	0	0	0
Qsox1	1000	336.805	387.682	471.883	397.203	378.161	378.756	390.955	316.87	382.327	388.575	327.581	329.069	391.55	373.698	365.963	346.623	333.234	546.861	358.822	352.871	328.771	416.84	387.682	494.496	442.428	395.716	303.184	284.737	337.102	371.318
Cep350	1000	259.863	250.545	292.929	282.483	233.11	247.915	216.277	186.218	246.863	214.248	231.081	235.365	310.513	260.915	242.053	319.907	320.733	375.968	256.106	303.9	223.867	337.266	338.393	359.059	348.538	269.106	277.598	280.228	305.103	258.736
Tor1aip1	1000	445.145	508.673	462.492	488.849	421.491	420.815	434.783	386.123	418.563	461.365	442.217	447.173	500.788	507.096	418.337	545.393	499.437	665.24	504.393	531.877	510.701	644.515	581.888	619.734	724.262	580.761	531.651	525.569	576.481	512.503
Tor1aip2	1000	332.799	349.692	358.816	342.787	323.428	334.649	292.725	272.75	309.741	321.455	348.582	329.346	381.874	355.364	317.139	378.792	344.02	477.065	343.527	381.751	323.058	417.139	423.798	442.417	463.872	407.275	368.434	380.395	381.751	378.422
Fam163a	1000	146.711	160.843	148.767	182.682	136.434	148.253	81.963	60.1233	137.975	135.149	143.628	168.551	180.37	141.059	113.823	108.428	72.7133	78.8798	75.0257	89.4142	115.108	211.716	91.9836	79.1367	100.462	126.413	100.976	92.4974	139.26	116.393
Tdrd5	1000	53.5714	40.8986	57.8917	54.4355	46.947	42.0507	33.9862	27.0737	47.8111	44.0668	44.6429	38.0184	50.9793	36.2903	32.2581	20.7373	16.7051	9.21659	19.8733	20.7373	29.9539	30.2419	13.2488	20.4493	29.3779	12.3848	8.64055	9.21659	9.50461	20.7373
Nphs2	1000	0.32175	1.287	0.643501	0.32175	0	0.643501	10.296	6.43501	0	3.2175	0	0	0.643501	0.965251	0.32175	0	0.32175	0	0.32175	0	0.32175	0	0.32175	0.643501	0.32175	0.32175	0	0	0	0.32175
Soat1	1000	223.197	234.692	262.278	264.577	214.42	218.391	203.762	165.935	231.139	204.598	228.213	238.871	257.889	264.159	215.465	272.309	260.188	388.506	243.469	259.979	226.123	336.677	318.077	354.65	324.347	301.985	282.341	251.411	295.507	269.175
Abl2	1000	540.974	485.626	598.096	578.682	503.92	499.253	327.235	325.089	476.666	429.905	471.159	528.374	646.164	550.961	479.839	474.426	458.559	503.453	411.798	449.692	341.982	501.213	466.399	479.559	484.133	444.092	508.4	467.612	516.987	427.385
Tor3a	1000	107.711	94.5532	100.367	98.8372	94.2472	127.907	114.443	76.8054	82.3133	103.427	93.9412	84.7613	113.219	93.0233	79.5594	115.973	114.443	263.158	105.263	121.481	110.159	126.683	197.674	220.012	139.841	200.428	119.951	114.137	134.639	108.323
Fam20b	1000	1155.26	1296.13	1238.56	1243.51	1221.33	1143.46	1197.5	1072.44	1099.81	1079.99	1022.65	1123.64	1212.13	1224.87	1044.12	1255.31	1122.94	1341.91	1149.13	1163.99	1105	1442.19	1286.93	1332.94	1370.69	1270.65	1213.31	1104.06	1179.33	1318.31
Ralgps2	1000	505.538	438.665	493.761	511.706	401.514	393.663	247.722	265.947	438.385	375.999	401.094	447.357	492.219	425.067	374.597	397.308	368.008	398.009	365.484	390.158	298.612	403.617	367.167	406.982	441.75	378.242	466.003	439.226	431.656	384.13
Angptl1	1000	24.1899	29.2104	26.4719	22.3642	20.5386	20.0822	14.1488	9.58466	21.9078	11.8667	17.8001	19.1693	24.1899	14.6052	15.518	18.7129	19.1693	27.8412	21.9078	14.1488	15.9744	24.6463	12.7796	24.1899	27.8412	23.7335	15.518	11.8667	19.6257	15.518
Tex35	1000	15.6709	5.87659	9.79432	11.7532	8.81489	6.85602	5.87659	7.83546	1.95886	4.89716	5.87659	7.83546	6.85602	3.91773	6.85602	1.95886	5.87659	8.81489	1.95886	0.979432	0.979432	1.95886	0	1.95886	1.95886	0	2.9383	0	0.979432	0
Rasal2	1000	699.283	554.649	723.572	733.426	598.248	509.357	601.632	557.834	576.249	523.691	664.643	675.592	919.172	719.391	718.694	452.618	409.317	484.87	458.79	465.061	422.656	489.946	495.521	526.279	637.567	438.782	430.52	380.649	391.997	524.886
2810025M15Rik	1000	434.673	429.648	559.464	503.35	421.273	418.76	431.323	361.809	458.961	448.911	490.787	494.137	608.04	431.323	480.737	350.084	287.27	414.573	323.283	336.683	322.446	397.822	324.121	448.911	458.961	304.858	296.482	278.894	322.446	414.573
BC026585	1000	200.931	227.308	212.568	193.949	192.397	220.326	139.643	130.334	206.362	234.29	151.28	206.362	178.433	181.536	176.106	245.927	291.699	385.57	271.528	287.82	207.137	353.763	329.713	377.812	334.368	358.417	236.618	263.77	309.542	237.393
Sec16b	1000	18.2796	13.7634	32.9032	16.3441	13.3333	13.3333	25.1613	23.6559	26.2366	16.3441	12.9032	15.0538	32.9032	16.129	14.1935	4.51613	4.94624	10.1075	5.16129	4.30108	6.02151	5.5914	4.08602	4.30108	11.828	6.45161	7.31183	4.73118	5.16129	7.09677
Brinp2	1000	989.759	995.855	978.786	969.52	970.983	913.436	1184.1	1180.2	970.495	930.017	884.418	919.532	1025.36	1151.18	929.042	646.428	600.098	654.475	754.45	595.221	739.332	812.241	580.346	813.704	1010.97	722.994	745.428	620.58	688.125	1057.79
Astn1	1000	2247.09	2047.2	2269.24	2232.83	2099.67	1924.56	1775.19	1854.65	2070.6	1831.4	1615.73	1789.04	2185.63	1992.39	1677.88	2029.9	1985.19	1968.72	1888.29	1987.4	1614.06	2175.11	1905.04	1999.17	2205.15	1454.73	1847.87	1645.21	1711.79	1822.12
Mir488	1000	0	0	0	0	0	0	0	9.17431	0	0	0	0	0	0	0	0	9.17431	0	0	0	0	0	0	0	9.17431	0	0	18.3486	0	0
Pappa2	1000	4.19336	2.67909	2.44613	2.67909	3.37798	2.32964	11.7647	10.7164	3.2615	3.49447	2.91206	3.61095	2.67909	3.02854	1.63075	0.349447	0.582411	3.2615	4.65929	0.232964	7.33838	1.39779	0.465929	7.10542	10.5999	3.2615	5.00874	1.2813	1.63075	17.9383
Rfwd2	1000	491.1	494.066	511.669	553.6	469.343	419.502	487.342	413.964	446.796	424.051	478.441	500.593	568.236	524.723	439.676	495.847	460.641	527.492	494.066	477.848	467.168	547.666	512.658	526.305	626.187	474.486	517.009	457.081	455.894	574.763
Scarna3a	1000	0	25.4237	25.4237	25.4237	25.4237	25.4237	8.47458	16.9492	16.9492	8.47458	33.8983	8.47458	0	25.4237	0	8.47458	8.47458	16.9492	16.9492	16.9492	8.47458	25.4237	8.47458	16.9492	25.4237	16.9492	16.9492	16.9492	0	25.4237
Mir1843b	1000	0	0	0	0	0	0	0	0	0	0	0	0	0	0	0	0	0	0	0	0	0	0	0	0	0	0	0	0	0	0
Tnr	1000	876.552	637.627	865.06	837.442	704.356	675.626	515.292	480.259	710.473	498.054	535.496	661.909	881.742	739.388	589.805	627.618	627.989	602.966	570.158	563.114	463.763	649.305	529.008	586.654	703.244	427.247	515.477	446.339	504.541	572.753
4930523C07Rik	1000	12.2449	17.9963	17.8108	18.7384	14.6568	19.295	15.9555	12.0594	18.5529	14.1002	15.3989	15.9555	22.449	21.3358	9.6475	14.4712	19.666	33.3952	15.3989	16.141	16.141	22.2635	18.3673	24.3043	22.0779	24.3043	23.3766	18.9239	21.1503	18.1818
4930562F07Rik	1000	1.1274	0	2.25479	2.25479	1.1274	0	2.25479	2.25479	5.63698	1.1274	1.1274	1.1274	0	0	1.1274	0	0	0	0	0	1.1274	1.1274	0	1.1274	0	0	1.1274	0	1.1274	0
Tnn	1000	0.344293	0.344293	0.172147	0.172147	0.172147	0.344293	1.89361	1.89361	0.688587	2.5822	0.860733	0.51644	1.03288	0.344293	0	0.51644	0.51644	0.51644	0.344293	0.344293	0.344293	0.51644	0.344293	0.51644	0.860733	0.51644	0.860733	0.344293	0.344293	0.344293
Mrps14	1000	509.137	533.503	538.579	537.563	485.787	493.909	531.472	476.65	525.381	524.873	561.929	527.919	649.239	564.975	505.076	614.213	464.975	659.391	551.777	568.02	535.533	655.838	559.391	637.056	711.168	554.315	577.157	537.056	594.924	658.883
Cacybp	1000	1452.48	1446.81	1435.46	1500.24	1426.95	1339.48	1448.7	1354.14	1392.91	1308.27	1389.13	1382.03	1550.35	1474.7	1287.47	1559.81	1442.08	1697.4	1518.2	1522.46	1426	1700.71	1614.18	1636.41	1730.97	1398.11	1503.07	1448.23	1425.53	1621.28
Rabgap1l	1000	1066.5	978.291	1115.4	1055.54	958.794	860.892	778.27	736.116	929.181	803.351	954.052	1066.39	1207.61	1061.97	914.533	567.394	524.924	679.102	553.167	554.431	547.476	596.902	567.921	666.14	731.268	558.225	555.907	508.905	513.542	650.121
Mir1927	1000	0	0	0	9.17431	0	27.5229	9.17431	18.3486	0	0	9.17431	0	0	0	0	0	0	27.5229	0	0	9.17431	0	0	9.17431	0	0	0	0	0	0
Gpr52	1000	87.477	62.6151	80.1105	65.3775	74.5856	58.9319	151.013	187.845	83.7937	58.9319	62.6151	44.1989	58.9319	58.011	53.407	1996.32	1549.72	1638.12	1373.85	1681.4	847.145	1443.83	1793.74	1255.06	1254.14	2284.53	2681.4	2673.11	2798.34	1627.99
Rc3h1	1000	280.992	279.266	310.508	287.44	266.733	237.49	227.681	206.612	248.933	235.129	215.058	252.656	273.999	262.828	222.232	300.064	294.705	316.229	253.292	302.516	257.47	328.581	266.733	287.985	353.737	251.748	265.916	242.212	280.992	263.827
Serpinc1	1000	0.462749	33.3179	747.802	0	12.957	0.462749	6.01573	2.31374	612.679	122.166	11.106	58.7691	585.377	31.9297	321.148	3.23924	8.32948	202.221	0	6.01573	0.925497	0	0.462749	31.0042	54.6043	42.1101	10.1805	6.01573	21.2864	24.0629
Zbtb37	1000	68.7613	32.1916	74.9421	59.4901	43.008	53.8244	45.3258	21.6328	53.3093	23.178	29.6163	31.419	71.5941	43.2655	45.5833	88.0762	101.725	92.4543	58.975	106.104	62.3229	72.6243	84.7283	83.4406	94.257	68.2462	82.4105	68.2462	95.8022	59.7476
Gas5	1000	1828.11	2034.06	2228.27	2082.62	1864.92	1672.67	1507.05	1362.18	1778.78	1714.17	1943.23	1841.43	2171.89	1831.25	1788.18	1950.67	1790.92	2236.1	1938.53	1981.6	1691.86	2037.59	2016.05	2143.7	2475.33	1738.84	1931.09	2047.77	2088.1	1989.43
Snord47	1000	476.923	476.923	615.385	553.846	276.923	369.231	384.615	384.615	676.923	630.769	384.615	630.769	584.615	584.615	538.462	415.385	584.615	353.846	461.538	446.154	323.077	476.923	430.769	707.692	800	476.923	600	676.923	230.769	630.769
Dars2	1000	278.414	255.794	311.924	296.844	271.153	248.255	270.595	241.553	270.595	229.824	238.76	249.372	277.297	255.515	240.156	241.832	226.473	277.018	246.858	249.93	213.348	281.765	255.236	280.089	304.943	199.944	220.609	201.899	228.149	261.659
Cenpl	1000	21.3202	26.6503	29.5203	19.6802	27.0603	20.9102	22.9602	20.5002	20.0902	22.1402	18.8602	25.4203	21.3202	23.3702	19.6802	20.9102	20.5002	35.2604	25.0103	31.5703	27.4703	29.9303	20.5002	22.1402	41.0004	20.0902	20.0902	23.7802	21.7302	27.8803
Klhl20	1000	335.893	325.985	355.462	365.866	317.315	273.718	278.92	238.791	295.764	291.058	302.7	322.269	366.113	312.361	297.003	312.608	297.994	347.04	284.865	301.461	275.452	374.04	305.92	312.361	368.591	263.067	252.911	280.654	282.388	306.911
Ankrd45	1000	883.965	829.439	970.185	1052.91	804.459	793.446	945.205	859.253	767.929	666.935	803.653	837.228	909.482	809.294	775.987	1271.02	1074.13	1246.04	1238.79	1240.4	1128.93	1316.41	1230.46	1329.84	1297.61	820.843	841.794	817.083	892.023	982.272
4930469G21Rik	1000	0	0	0	0	0	0	0	0	1.04822	1.04822	0	0	0	1.04822	0	0	0	0	0	0	0	0	0	0	0	0	3.14465	1.04822	1.04822	1.04822
Prdx6	1000	2882.68	3422.66	3660.51	3184.01	2805.95	2751.31	2903.98	2345.12	3063.48	3512.25	3601.04	3531.94	3735.64	3840.5	3353.15	4077.14	4089.59	4767.78	3983.93	4288.47	3553.64	4462.43	4112.9	4391.32	5912.82	4392.13	4679.79	4750.5	5157.49	4590.2
Tnfsf4	1000	0	0	0	0	0	0	0	0	0	0	0	0	0	0	0	0	0	0	0	0	0	0	0	0	0	0	0	0	0	0
Tnfsf18	1000	0	1.45349	0.484496	0	0	0	3.39147	0	0	0.484496	0	0	0	0.968992	0.484496	0	0	1.45349	0	0	0	0	0	0.484496	0	0.484496	0.484496	0	0.484496	0
Fasl	1000	2.58532	3.10238	2.06825	4.1365	1.03413	4.1365	4.65357	3.10238	1.55119	2.58532	0.517063	2.06825	3.10238	6.20476	1.55119	0.517063	0.517063	2.58532	2.06825	3.10238	1.03413	2.58532	2.06825	2.06825	2.06825	2.58532	0	2.06825	1.03413	1.03413
Suco	1000	310.399	320.545	367.153	370.958	298.827	302.473	267.597	277.584	302.79	295.656	272.67	311.826	363.19	326.094	286.779	457.514	433.735	531.706	392.834	452.283	356.214	485.574	460.209	451.966	520.45	410.59	446.1	442.93	448.637	429.455
4930558K02Rik	1000	1.71821	2.57732	3.43643	6.87285	5.15464	4.29553	0.859107	0.859107	0.859107	0	0	0.859107	0	1.71821	2.57732	4.29553	6.01375	6.87285	6.87285	5.15464	4.29553	7.73196	2.57732	2.57732	1.71821	0.859107	4.29553	6.01375	12.0275	2.57732
Pigc	1000	131.778	138.746	159.346	146.925	132.99	135.716	144.199	129.961	139.958	156.316	160.254	155.105	157.831	184.187	129.052	189.337	172.675	228.113	196.304	191.154	180.551	218.419	172.372	213.875	258.709	198.425	214.178	198.728	239.321	212.663
Dnm3	1000	708.361	770.57	709.292	777.482	749.701	617.573	1035.89	983.251	712.083	699.056	592.45	655.324	709.424	762.329	590.722	1805.66	1519.61	1592.18	1425.36	1601.89	1328.19	1985.91	1531.7	1498.34	1731.89	1398.25	1518.54	1497.41	1527.98	1416.46
2810442N19Rik	1000	0	1.08814	1.08814	1.08814	0	0	0	0	0	0	0	0	1.08814	1.08814	0	0	0	0	0	0	0	0	0	0	1.08814	1.08814	1.08814	0	0	0
Dnm3os	1000	0	1.26135	1.26135	1.38749	0.504541	0.756811	1.00908	0.378406	0.504541	0.504541	0.25227	0.25227	0.504541	0.378406	0.882947	0.126135	0.25227	0.25227	0.378406	0	0	0	0.378406	0.756811	0.504541	0.504541	0.25227	0	0	0.378406
Mir199a-2	1000	0	0	0	0	0	0	0	0	0	0	0	0	0	0	0	0	0	0	0	0	0	0	0	0	0	0	0	0	0	0
Mir214	1000	0	0	0	0	0	0	0	0	0	0	0	0	0	0	0	0	0	0	0	0	0	0	0	0	0	0	0	0	0	0
Mettl13	1000	178.136	215.771	220.43	208.244	203.226	179.211	166.667	175.269	205.735	166.308	177.419	185.663	227.24	224.373	178.853	264.516	237.993	293.548	246.953	268.459	208.244	270.968	257.348	259.14	294.624	216.487	226.882	229.391	242.652	211.111
Vamp4	1000	1157.19	1156.79	1204.58	1216.82	1054.5	1021.72	1161.14	1115.32	1033.97	1132.7	1125.2	1098.74	1332.94	1187.2	1066.35	1370.85	1254.34	1412.72	1302.92	1349.53	1210.51	1391.39	1269.35	1400.47	1591.63	1125.2	1347.95	1261.45	1256.71	1447.87
Myoc	1000	344.231	233.173	493.75	617.788	194.231	341.346	662.5	510.577	222.115	483.173	376.923	280.769	278.846	277.404	220.673	20.6731	17.7885	23.0769	21.6346	37.0192	81.25	39.9038	25	36.5385	44.2308	100.962	39.4231	19.7115	34.1346	63.9423
7420461P10Rik	1000	0	1.34953	0	1.34953	0	0	1.34953	0	0	0	0	0	1.34953	2.69906	0	0	0	4.04858	0	0	0	0	0	0	0	0	0	0	0	0
Prrc2c	1000	1174.93	1029.49	1211.03	1217.73	1044.04	999.809	928.763	917.848	1024.32	911.241	925.89	1006.7	1276.71	1063.67	940.636	1407.32	1415.07	1515.61	1202.32	1374.47	975.488	1450.88	1360.02	1382.9	1456.15	1060.99	1268.1	1253.06	1300.36	1109.35
Fmo4	1000	1.11919	1.11919	10.6323	1.67879	1.11919	1.11919	2.79799	1.11919	13.9899	2.79799	1.11919	1.67879	3.35758	2.79799	0.559597	1.67879	3.35758	5.59597	0	1.67879	0.559597	2.23839	0.559597	1.67879	1.11919	1.67879	3.91718	2.23839	0.559597	1.11919
Fmo1	1000	84.6948	108.77	222.7	123.388	70.0774	96.3027	146.174	123.388	188.306	120.378	95.0129	78.2459	165.52	94.583	81.2554	212.382	224.42	223.13	148.753	181.857	124.248	193.895	193.895	167.67	199.914	163.801	165.52	193.465	197.764	124.678
Fmo2	1000	10.4916	21.5827	39.5683	23.0815	14.0887	18.5851	21.5827	14.988	24.2806	48.8609	19.7842	21.283	15.5875	24.5803	11.3909	20.6835	20.3837	33.2734	16.4868	23.0815	14.6882	24.2806	23.0815	21.8825	75.8393	36.5707	42.2662	23.3813	31.7746	41.6667
Fmo6	1000	0	0	0	0	0	0	0	0	0	0	0	0	0	0	0	0	1.06952	0	0	0	0	0	0	0.534759	0	0	0	0	0	0
Fmo3	1000	0	0	18.408	0	0	0	0	0	71.6418	18.408	0.995025	1.49254	0	7.46269	0	0	0	4.97512	0.497512	0	0	0	0	0	6.46766	2.98507	0.497512	0	0	3.9801
Mroh9	1000	0	0	0	0	0	0	0	0	0	0	0	0	0	0	0	0	0	0	0	0	0	0	0	0	0.338295	0	0	0	0	0
Prrx1	1000	55.4511	55.7197	60.4189	54.6455	43.6359	47.6638	64.1783	53.3029	41.3534	46.0526	44.71	53.84	55.1826	56.391	45.5156	64.1783	63.6412	65.7895	58.1364	64.8496	51.826	75.8593	62.5671	57.7336	73.4425	66.1923	63.1042	58.1364	74.6509	58.942
Gorab	1000	283.38	241.929	281.786	305.301	259.067	218.015	161.817	135.911	241.132	216.421	237.943	237.146	306.895	263.452	251.495	250.697	213.631	241.132	222.798	218.812	194.898	233.559	212.834	248.306	260.662	179.753	211.24	199.283	188.521	198.884
Mettl11b	1000	23.7417	25.641	31.339	22.792	36.0874	17.094	15.1947	15.1947	25.641	22.792	23.7417	33.2384	22.792	29.4397	18.0437	36.0874	56.0304	48.433	41.7854	37.9867	26.5907	38.9364	39.886	49.3827	70.2754	37.037	71.2251	30.3894	34.188	62.6781
Kifap3	1000	3387.78	3317.71	3488.53	3585.79	3364.09	2939.15	3293.02	3177.06	3174.31	3062.34	2897.51	3040.4	3563.34	3396.26	2880.55	3778.8	3373.57	3552.62	3573.32	3586.53	3246.63	4137.16	3580.3	3696.51	4154.61	2774.81	3167.33	2991.52	3037.41	3665.59
Scyl3	1000	357.219	339.305	372.574	383.451	341.864	317.338	329.495	307.102	310.727	291.32	325.656	330.774	427.597	361.271	347.196	390.915	340.798	432.075	377.692	396.886	333.973	426.317	425.677	386.863	465.344	376.626	430.795	465.771	453.828	417.786
BC055324	1000	10.6529	12.3711	15.1203	14.7766	15.1203	16.1512	12.7148	16.1512	9.27835	14.0893	14.433	14.7766	8.93471	17.1821	10.6529	36.0825	50.1718	38.1443	27.8351	44.6735	21.3058	35.3952	43.6426	31.2715	38.8316	47.7663	52.921	65.2921	53.9519	40.2062
Mettl18	1000	121.399	92.5926	134.431	128.944	129.63	123.457	92.5926	91.2209	124.143	102.195	108.368	115.912	121.399	100.823	119.342	172.84	164.609	194.102	140.604	147.462	115.912	171.468	159.122	168.038	170.782	144.033	148.834	176.955	185.185	132.373
Sele	1000	0	0.343407	0.343407	1.37363	0	0	0.686813	1.37363	0.343407	1.03022	0	0.343407	0.343407	0.343407	0	0	0	0	0.343407	0	1.71703	0	0	1.03022	1.03022	0	0	0.343407	0.343407	0.343407
Sell	1000	1.29255	0	1.29255	0	0	3.87764	0.430849	0.861698	0.430849	0	1.29255	0	1.7234	0	0.430849	0	0.430849	0.861698	0.430849	2.58509	0.430849	0.861698	0.861698	0.861698	2.58509	0.861698	0	0.430849	1.29255	0
Selp	1000	0	0.290867	1.45433	0	0	0.581734	0	0.581734	0	0	0	0	0.290867	0	0.290867	0	0	0.8726	0	0	0	0	0.290867	0	0	0	0	0	0.290867	0
Gm16548	1000	4.02901	2.41741	8.05802	0	1.6116	4.83481	1.6116	0.805802	4.83481	4.83481	1.6116	2.41741	4.02901	3.22321	10.4754	2.41741	2.41741	16.116	0.805802	4.02901	0.805802	4.02901	8.86382	7.25222	2.41741	16.116	0.805802	1.6116	3.22321	0
F5	1000	14.5298	10.8973	58.5228	15.337	18.2968	387.192	6.32315	5.11234	70.0928	19.104	4.9778	37.8044	44.2621	17.2205	32.5575	41.3023	34.9791	1445.45	57.9847	50.8543	14.6643	14.2607	771.425	977.264	57.1775	1092.02	40.6296	23.2746	72.7835	11.1664
Slc19a2	1000	206.385	217.306	266.032	227.947	209.465	195.183	236.628	201.064	250.35	221.227	215.346	225.427	255.671	252.87	203.864	201.624	183.982	247.55	187.062	200.784	192.103	241.949	229.348	255.391	232.428	204.144	168.86	151.218	161.859	241.949
Ccdc181	1000	580.169	572.785	539.03	579.641	523.207	520.042	583.861	533.228	516.35	497.89	502.637	506.329	613.397	527.954	454.114	676.688	607.068	786.392	628.692	635.549	557.489	673.523	663.502	810.127	768.987	648.734	661.92	633.439	651.371	675.105
Blzf1	1000	242.875	246.84	270.136	271.623	229.74	224.04	216.357	197.026	229.492	227.757	241.636	239.653	303.098	256.506	222.553	265.675	228.501	291.945	238.414	279.306	241.636	284.015	262.701	289.467	316.976	211.648	267.658	265.923	278.067	265.675
Nme7	1000	211.8	196.553	217.103	222.738	202.188	194.233	198.21	193.901	198.542	185.946	209.811	201.856	243.288	196.553	198.542	273.119	295.658	307.59	247.265	292.343	189.592	299.304	310.573	294.995	294.995	229.698	287.703	282.731	287.372	248.591
Atp1b1	1000	29684.2	30334.7	30434	31514.3	30800	27505.4	26486.5	23091.5	28461.8	27015.1	31637.5	29885.7	37848.6	35466.4	31175.3	24429.7	19930.9	24658.3	24944.4	22685.7	23122.8	31454.1	24096.5	26664.1	28666	20255.2	18710.8	18789.2	19286.1	26475.3
Dpt	1000	1.22249	1.22249	1.22249	1.22249	0	2.44499	1.83374	3.66748	1.83374	3.66748	3.05623	1.22249	2.44499	0	1.83374	0.611247	0	0	1.22249	0	1.22249	0	0	0.611247	1.22249	0	4.88998	0.611247	1.22249	6.72372
Gm20743	1000	62.3426	49.7481	57.9345	42.1914	49.1184	51.6373	35.2645	20.7809	40.932	52.8967	45.9698	56.0453	56.0453	59.8237	54.7859	37.7834	43.4509	59.194	45.3401	45.9698	51.6373	37.7834	42.1914	53.5264	86.272	49.1184	56.0453	54.7859	61.0831	51.0076
Xcl1	1000	0	0	0	1.99203	0	0	0	1.99203	0	0	1.99203	0	1.99203	1.99203	0	0	1.99203	1.99203	1.99203	0	0	0	0	1.99203	0	0	0	0	0	1.99203
4930568G15Rik	1000	8.01603	6.01202	5.01002	5.01002	2.00401	6.01202	2.00401	0	4.00802	0	4.00802	4.00802	3.00601	2.00401	3.00601	2.00401	4.00802	0	3.00601	3.00601	3.00601	9.01804	2.00401	3.00601	9.01804	3.00601	0	0	0	1.002
Tbx19	1000	0	0	0.375657	0.375657	0	1.87829	1.12697	1.12697	0	0.375657	1.12697	0.375657	0.375657	0.751315	0.751315	0.375657	0	0.751315	0	0	0.751315	0	0	0	0	0	0.751315	0.375657	0.751315	0
Sft2d2	1000	289.721	355.773	349.077	339.667	293.341	314.332	369.526	323.923	287.369	329.171	269.092	308.722	322.295	342.743	265.653	487.875	503.8	797.503	472.132	522.801	391.06	533.84	600.796	639.522	672.277	597.72	570.033	471.77	547.412	495.114
Tiprl	1000	430.262	454.152	493.515	478.726	438.453	410.466	395.904	379.522	412.287	407.509	414.107	397.497	501.024	476.223	408.874	445.734	397.042	467.349	402.275	460.296	394.312	478.953	441.638	459.613	503.072	369.738	441.183	399.772	400.228	444.596
Gpr161	1000	217.705	411.22	285.126	380.854	342.254	251.673	56.6135	56.0988	299.537	293.361	306.227	379.825	486.361	549.151	509.521	75.1415	92.1256	82.8616	58.1575	67.9362	59.7015	85.9496	76.1709	75.6562	74.1122	48.8935	47.3495	47.3495	53.0108	49.9228
Dcaf6	1000	1559.46	1377.31	1545.23	1649.62	1423.6	1342.81	1373.07	1203.93	1330.41	1257.49	1369.14	1444.18	1790.32	1461.42	1337.07	1298.64	1200	1367.93	1288.05	1252.95	1047.81	1362.48	1302.27	1373.07	1454.77	1197.88	1297.43	1215.13	1291.68	1392.44
Mpc2	1000	3073.77	2868.85	3482.44	3203.75	2903.98	2908.67	3053.86	2351.29	2948.48	2911.01	3228.34	3111.24	3715.46	3326.7	3023.42	2544.5	2113.58	2844.26	2680.33	2483.61	2352.46	3374.71	2707.26	2914.52	3085.48	2687.35	2261.12	2367.68	2459.02	2964.87
Adcy10	1000	1.15185	1.91975	1.5358	1.15185	0.575926	1.91975	3.07161	1.91975	0.575926	1.34383	1.15185	0.575926	1.15185	0.191975	0.767902	0	0	0.191975	0.191975	0.575926	0.575926	0.575926	0.191975	0.767902	0.767902	0.767902	0.959877	0.575926	1.15185	0.575926
Mpzl1	1000	395.161	471.986	435.484	473.26	410.441	368.846	367.572	277.165	368.421	421.053	415.535	439.728	457.131	452.462	383.701	430.815	399.83	476.655	374.363	449.066	382.852	528.014	439.304	424.448	568.336	385.823	478.353	485.144	492.784	408.319
Rcsd1	1000	61.0487	92.1348	83.5206	105.243	58.0524	77.5281	102.622	73.7828	73.0337	79.4007	73.4082	62.9213	79.0262	80.1498	62.9213	111.61	122.846	118.352	98.1273	93.633	98.1273	167.79	115.73	120.225	121.723	137.453	129.213	131.086	141.199	101.873
Creg1	1000	591.529	597.647	748.706	717.647	508.706	534.588	600	518.118	669.176	584.471	569.412	569.882	742.588	613.647	564.706	653.647	645.647	836.235	645.647	688	627.294	996.706	728.941	754.824	826.824	658.353	604.235	640.471	712	678.588
Cd247	1000	1.95482	1.95482	1.52042	3.04083	1.30321	1.95482	0.434405	0.651607	1.30321	1.08601	0.651607	1.08601	2.17202	0.434405	0.651607	0.434405	0.86881	0.217202	0.217202	0.217202	0.434405	0.86881	0.217202	0.217202	1.30321	1.30321	1.08601	0.434405	0	0
Pou2f1	1000	135.64	126.876	145.622	149.28	108.893	115.522	110.036	102.263	110.722	105.616	110.493	116.589	139.831	132.363	104.854	170.845	204.679	193.325	142.955	186.085	134.497	184.257	147.07	176.713	207.879	139.602	171.074	175.265	188.219	141.812
Dusp27	1000	1.98758	2.48447	4.7205	11.677	3.72671	3.47826	6.95652	3.22981	1.98758	3.47826	2.73292	3.22981	5.21739	2.98137	3.22981	4.47205	7.45342	5.96273	4.47205	3.47826	5.96273	22.6087	6.70807	4.2236	7.70186	5.96273	3.22981	3.97516	4.2236	8.19876
Gpa33	1000	0	0	0.43611	0	0	0	0	0	0	0	0	0	0	0	0	0	0	0.43611	0	0	0	0.43611	0	0.43611	0	0	0	0.43611	0	0.43611
Mael	1000	0	1.29366	0	10.3493	0	0	1.29366	0	0	0.646831	0.646831	0	1.94049	0	7.76197	0	0	0.646831	5.82147	0	0	3.23415	6.46831	0.646831	0	0.646831	0	0.646831	1.29366	0
Ildr2	1000	1159.2	913.923	1190.92	1290.19	1039.23	994.673	973.608	957.143	971.55	879.056	674.939	838.741	994.794	836.804	715.254	482.567	514.891	582.324	559.08	530.508	539.952	941.525	497.942	687.651	798.547	372.881	362.349	296.852	364.649	552.3
Tada1	1000	795.709	814.832	940.765	933.769	741.604	707.09	689.832	590.485	784.981	749.534	782.183	800.373	833.489	873.134	714.552	975.28	926.772	1048.97	891.325	973.881	769.59	1057.37	1029.38	957.556	1030.32	823.694	918.843	875	864.272	862.873
Pogk	1000	413.433	585.889	431.208	466.893	461.872	375.984	520.488	445.997	417.096	472.456	432.293	495.658	464.993	586.024	408.82	773.134	687.246	833.65	721.71	830.665	763.229	890.366	763.229	739.484	995.522	745.862	687.924	823.609	877.476	729.851
Gm4846	1000	0	0	0	0	0	0	0	0	0	0	0	0	0	0	0	0	0	0	0	0	0	0	0	0	0	0	0	0	0	0
Gm4847	1000	0.664011	0.664011	0.664011	0.664011	0.332005	0	0.332005	0.996016	0.332005	0.664011	0	0.664011	0.332005	0.664011	0.996016	0	0	0	0	0	0	0	0	0	0.332005	0	0	0	0	0
Fmo9	1000	0.978793	0	0.326264	0.978793	0	0	0	0	0.652529	0	0	1.63132	0	0	0.326264	0	0	0.326264	0	0.326264	0	0	0.326264	0.326264	0	0.652529	0	0	0	0
Gm16701	1000	141.026	126.068	131.41	138.889	133.547	135.684	184.829	158.12	148.504	116.453	120.726	130.342	144.231	112.179	84.4017	321.581	327.991	324.786	237.179	295.94	229.701	233.974	307.692	335.47	285.256	211.538	310.897	298.077	324.786	258.547
Fam78b	1000	296.029	270.558	292.218	294.625	278.981	256.117	314.882	307.26	279.182	249.097	233.654	251.103	296.631	249.298	241.276	436.221	451.063	449.258	398.115	422.583	358.002	400.923	413.959	409.948	463.899	325.11	417.77	376.454	384.075	365.624
Uck2	1000	379.207	432.311	458.489	474.944	372.476	403.889	405.385	363.5	367.24	369.484	361.257	384.443	526.552	479.432	447.27	353.029	367.24	353.029	353.029	331.339	314.136	442.782	370.98	454.001	451.758	342.558	326.103	326.851	341.81	470.456
Mir6347	1000	0	0	0	0	0	0	0	0	0	0	0	0	0	0	0	0	0	0	0	0	0	0	0	0	0	0	0	0	0	0
Tmco1	1000	348.458	355.61	386.008	379.75	334.153	344.882	314.707	256.594	324.765	347.34	350.469	343.317	402.548	343.764	343.093	410.371	367.233	487.036	362.986	391.372	360.975	446.58	421.77	482.342	521.01	409.924	396.513	388.02	411.489	422.441
Aldh9a1	1000	543.946	589.834	682.669	607.13	524.532	528.768	506.53	499.471	594.423	662.196	498.059	548.182	682.316	580.304	520.649	734.91	628.309	880.339	609.954	718.673	556.301	766.325	713.731	762.796	972.467	672.432	644.193	687.963	765.619	603.953
Mgst3	1000	2187.4	3089.76	2896.06	3135.43	2760.63	2311.81	4502.36	3664.57	2825.2	3050.39	2705.51	2132.28	2697.64	2759.06	2459.84	2581.1	1929.13	2787.4	3308.66	2532.28	3264.57	3828.35	2809.45	3001.57	3960.63	2143.31	2248.82	1995.28	2100.79	3595.28
Lrrc52	1000	0	0	0	0.879507	0	4.39754	0	0	0.879507	0	0	0	0	0	0.879507	0	1.75901	9.67458	4.39754	0	0	0.879507	3.51803	1.75901	0	0	5.27704	1.75901	0	0.879507
Rxrg	1000	35.548	49.9365	43.5887	28.777	46.1278	45.7046	70.6729	164.621	59.6699	37.664	32.1625	31.7393	32.5857	33.4321	17.774	2581.89	2084.21	2625.48	1975.45	2235.29	1511.64	2074.06	2949.64	2073.64	1744.82	3587.39	3776.13	3264.07	3553.11	2477.78
Lmx1a	1000	6.59077	4.19413	2.99581	2.69623	3.29539	30.5572	0	0.898742	2.09706	4.79329	4.49371	12.5824	1.79748	5.09287	2.99581	4.49371	2.39664	95.8658	8.98742	5.69203	2.69623	4.19413	34.4518	69.8023	5.09287	70.1019	3.89455	1.4979	10.4853	0.599161
Pbx1	1000	849.677	876.185	928.987	922.629	843.319	766.056	944.397	938.362	808.728	773.815	713.685	753.341	978.448	869.828	722.953	891.918	914.655	958.082	942.241	904.634	853.772	965.625	856.573	1047.09	1186.42	832.22	1051.08	832.974	927.371	1051.29
Mir6348	1000	0	0	0	0	0	0	0	0	0	0	0	0	0	0	0	0	0	0	0	0	0	0	0	0	0	0	0	0	0	0
Nuf2	1000	56.1331	64.8649	52.3909	62.7859	59.0437	49.0644	33.6798	37.422	52.8067	50.7277	54.0541	54.8857	57.3805	58.6279	54.8857	64.0333	102.287	69.8545	83.1601	94.3867	54.8857	91.0603	65.6965	88.5655	99.7921	48.6486	101.455	117.256	117.256	69.4387
Rgs5	1000	592.04	744.61	659.48	724.157	643.449	691.542	780.542	678.275	688.778	495.301	479.27	597.568	683.803	822.001	410.724	636.263	579.878	709.232	570.481	580.431	650.083	756.219	787.728	906.578	899.945	1029.85	1061.36	693.201	831.951	998.894
Rgs4	1000	1882.69	2077.86	1922.82	2224.75	2009.52	1755.87	5589.26	4817.41	2004.76	1843.59	1835.77	1642.98	1728.32	1903.77	1470.25	9564.09	6321.66	8146.21	7564.09	8016.32	7007.14	8891.19	9498.81	7754.51	7045.56	12376.7	11815.7	11643	11059.2	9732.4
1700084C01Rik	1000	424.306	464.583	453.472	429.861	401.389	413.194	373.611	288.889	403.472	329.861	441.667	437.5	548.611	483.333	456.25	409.722	420.139	409.028	407.639	497.222	468.75	516.667	406.25	497.222	508.333	379.861	410.417	513.889	543.056	392.361
Hsd17b7	1000	216.003	204.198	220.157	230.214	197.202	199.169	251.421	222.125	223.437	198.295	217.971	197.202	324.661	251.64	240.052	201.574	199.169	268.693	228.028	217.534	224.311	259.948	242.02	262.134	300.394	187.801	191.299	228.684	227.372	246.83
3110045C21Rik	1000	24.6696	19.3833	23.7885	26.4317	19.3833	20.2643	28.1938	18.5022	22.9075	31.7181	24.6696	17.6211	27.3128	26.4317	19.3833	20.2643	14.978	19.3833	22.9075	15.859	29.0749	30.837	22.0264	33.4802	30.837	23.7885	19.3833	24.6696	17.6211	35.2423
Ddr2	1000	67.4306	66.9481	73.5826	81.7853	50.7841	93.1242	86.2485	75.9952	64.1737	60.193	58.8661	62.3643	74.6683	70.4463	54.1616	19.1797	30.5187	89.5054	32.5694	25.4524	37.9976	29.0712	56.8154	82.2678	58.0217	75.6333	41.4958	24.7286	33.1725	44.1496
Uap1	1000	609.274	723.735	702.335	738.651	690.986	609.274	843.385	787.938	640.078	660.83	625.162	596.304	735.733	725.681	661.479	633.593	568.093	694.228	767.185	654.669	750.973	773.022	663.748	755.512	903.048	619.001	621.92	577.173	595.979	864.137
Uhmk1	1000	1245.06	1128.95	1159.09	1191.7	1137.35	1103.75	1059.29	874.012	1183.79	924.901	759.387	1050.89	1280.63	1277.67	994.071	1428.85	1302.37	1388.83	1156.13	1333.5	1057.81	1602.77	1343.38	1295.95	1464.92	1042	1098.32	849.802	1042.98	1167.49
Sh2d1b2	1000	0	0	0	0	0	0	0	0	0	0	0	0	2.50627	0	0	0	0	0	0	0	0	0	0	0	0	0	0	0	0	0
Sh2d1b1	1000	0	0	0	0.697837	0	0.697837	0	0	0	0.697837	0	0.697837	0	1.39567	0	0	0	0.697837	0	0	1.39567	0	1.39567	1.39567	0	0.697837	0	0	0.697837	0.697837
Gm7694	1000	96.791	98.0955	86.0944	94.1821	92.095	97.3128	62.6141	61.3097	72.7889	83.2246	93.9212	110.097	90.5296	112.445	74.6152	64.1795	57.9181	93.9212	60.0052	55.0483	60.7879	55.8309	63.6577	81.9202	92.3559	64.4404	71.4845	54.0047	56.3527	55.8309
1700015E13Rik	1000	0	0	0	0	0	0	0	0	0	0	0	0	0	0	0	0	0	0	0	0	0	0	0	0	0	0	0	0	0	0
Nos1ap	1000	1090.39	1103.15	1185.12	1162.32	1181.87	1050.49	1119.16	994.3	970.684	969.87	1176.98	1179.97	1533.93	1554.56	1348.53	703.855	653.366	704.94	836.591	656.08	736.699	754.343	652.28	855.863	1056.73	611.835	682.682	524.159	559.175	1084.69
Olfml2b	1000	663.974	534.087	698.869	677.868	516.963	477.868	117.932	101.777	602.585	492.407	693.376	769.305	843.296	791.922	710.824	90.1454	94.6688	109.208	106.624	108.239	119.871	106.947	79.8061	105.977	143.78	79.483	87.2375	94.3457	95.6381	104.685
Atf6	1000	717.406	579.258	702.532	681.897	576.712	598.821	614.23	538.389	545.759	490.821	644.245	728.527	852.874	723.972	680.289	692.349	626.156	730.001	655.902	627.362	557.953	670.106	693.957	726.249	820.18	849.39	953.37	838.269	857.43	902.05
Dusp12	1000	490.539	558.224	582.242	537.846	459.971	435.953	452.693	414.847	446.87	501.456	516.739	473.799	566.23	561.135	465.066	441.776	417.758	484.716	416.303	454.148	395.924	415.575	433.042	471.616	537.118	473.071	575.691	570.597	614.265	516.012
Fcrlb	1000	18.6916	13.2399	18.6916	23.3645	11.6822	16.3551	36.6044	23.3645	8.56698	21.028	18.6916	21.028	24.9221	17.9128	14.7975	41.2773	25.7009	39.7196	24.9221	29.595	22.5857	28.8162	29.595	38.9408	31.1526	21.8069	24.1433	23.3645	27.2586	28.0374
Fcrla	1000	0	0	0	0	0	2.89519	0.579039	0.579039	0	0	0	0	0	0	0	0	0	0	0	0	0.579039	0	0.579039	0	0	0.579039	0	0.579039	0	0
Fcgr2b	1000	62.0957	90.5563	109.961	73.0918	62.7426	76.326	88.6158	75.0323	109.314	54.9806	56.9211	66.6235	84.088	76.326	69.2109	90.5563	101.552	112.549	75.6792	87.969	90.5563	93.7904	87.969	93.7904	137.128	89.2626	75.6792	65.9767	94.4373	86.6753
Fcgr4	1000	4	4	12.8	7.2	3.2	6.4	2.4	4.8	8	1.6	3.2	8.8	8	5.6	7.2	6.4	7.2	7.2	5.6	4	8.8	8.8	4.8	7.2	9.6	9.6	8	9.6	7.2	10.4
Fcgr3	1000	282.336	436.807	409.46	432.373	339.985	309.682	371.027	349.593	360.68	317.073	370.288	357.724	391.722	373.984	330.377	494.457	428.677	456.024	440.503	461.936	445.676	484.848	511.456	450.85	614.93	501.109	487.066	423.503	453.806	518.108
Mir6546	1000	0	0	0	0	0	0	0	0	0	0	0	0	0	0	0	0	0	0	0	0	0	0	0	0	0	0	0	0	0	0
Cfap126	1000	85.1064	92.8433	75.4352	46.4217	92.8433	112.186	40.619	47.3888	65.764	95.7447	37.7176	130.561	79.3037	87.0406	66.7311	90.9091	234.043	353.965	153.772	205.029	89.942	213.733	207.93	432.302	224.371	250.484	179.884	202.128	203.095	97.6789
Sdhc	1000	2770.99	2893.98	3268.87	2938.08	2784.56	2865.99	2810.01	2333.33	2694.66	2840.54	2846.48	2732.82	3426.63	2925.36	2638.68	3708.23	3335.03	4628.5	3404.58	3795.59	3385.07	4349.45	4320.61	4471.59	4380.83	3910.09	3490.25	3605.6	3670.06	3425.78
Mpz	1000	1.50527	0	0.501756	0	0	2.00702	0.501756	1.00351	2.00702	0	0.501756	0	0	0	0	28.0983	26.0913	22.0773	24.5861	22.579	16.558	18.0632	20.0702	22.0773	21.0738	24.0843	36.1264	31.1089	42.1475	15.5544
Pcp4l1	1000	1023.49	1251.43	1185.4	1667.3	1198.73	1687.62	1815.87	1701.59	968.889	1196.83	1228.57	1160.63	1300.95	1393.65	1184.76	15864.1	13546	17294.6	12944.1	14431.7	10066	17662.9	17285.7	14539	12586.7	15840.6	17032.4	18424.1	19427.9	12339
Nr1i3	1000	2.82885	9.19378	113.154	4.9505	6.36492	4.9505	4.24328	4.24328	90.5233	28.9958	11.3154	10.6082	111.033	8.48656	60.1132	10.6082	5.65771	40.3112	5.65771	14.1443	9.19378	16.9731	12.7298	17.6803	17.6803	18.3876	7.77935	17.6803	19.0948	8.48656
Tomm40l	1000	833.904	947.945	965.411	971.575	869.521	898.973	1062.67	925.342	867.466	879.795	926.37	898.63	1018.84	972.603	826.712	1208.22	1169.52	1322.26	1211.3	1191.44	1131.85	1339.04	1250	1308.56	1382.53	1125.68	1231.51	1076.37	1160.27	1209.93
Apoa2	1000	32.0513	239.316	5144.23	18.1624	141.026	40.5983	68.3761	44.8718	5075.85	939.103	162.393	557.692	6044.87	239.316	3133.55	33.1197	88.6752	1405.98	34.188	61.9658	27.7778	34.188	21.3675	314.103	481.838	397.436	74.7863	111.111	162.393	159.188
Fcer1g	1000	376.9	591.185	610.942	475.684	420.973	413.374	446.809	384.498	492.401	486.322	480.243	475.684	537.994	495.441	454.407	557.751	471.125	550.152	495.441	548.632	472.644	572.948	585.106	591.185	759.878	624.62	597.264	533.435	603.343	583.587
Ndufs2	1000	4488.79	4574.1	5071.61	5013.7	4529.27	4250.31	4978.21	4146.95	4531.76	4429.02	4836.86	4437.11	5575.34	5029.89	4690.54	5411.58	4755.29	5813.2	5333.13	5254.67	4808.84	6325.03	5692.4	6058.53	6115.19	5136.36	4830.64	4978.21	5163.76	5736.61
Adamts4	1000	248.298	590.798	286.959	281.514	402.668	204.465	355.295	281.514	295.943	408.113	311.462	447.863	230.602	643.888	355.568	699.973	587.803	744.351	593.793	720.12	676.559	832.834	723.931	610.672	938.47	722.026	554.043	714.947	795.263	633.542
B4galt3	1000	984.484	1037.04	1114.61	1071.57	974.474	934.434	964.965	885.886	915.916	924.925	934.434	888.889	1210.71	1115.12	997.497	971.972	1003.5	1154.65	955.455	994.494	908.408	1155.16	1080.08	1187.69	1198.7	992.993	1019.02	998.498	1031.53	1072.57
Ppox	1000	705.107	755.629	828.666	828.116	707.304	637.562	670.511	631.521	685.887	757.825	737.507	739.703	795.167	701.263	714.992	629.325	650.741	842.943	605.162	661.175	625.481	717.188	654.585	797.364	883.031	574.959	626.03	663.921	711.148	621.087
Usp21	1000	896.836	985.328	1016.51	957.818	895.002	887.208	872.536	768.913	784.961	801.926	994.039	960.11	1112.33	1056.4	939.477	868.409	835.855	1011	825.768	790.463	743.237	943.145	906.923	982.118	1032.1	933.517	1022.01	950.94	1014.21	966.988
Ufc1	1000	2151.45	2267.63	2405.6	2241.7	2190.87	2122.41	2243.78	1826.76	1989.63	2108.92	2221.99	2069.5	2543.57	2340.25	2192.95	2287.34	1978.22	2551.87	2202.28	2152.49	2015.56	2520.75	2450.21	2604.77	2678.42	2181.54	2073.65	2137.97	2297.72	2540.46
Dedd	1000	444.566	501.281	497.988	519.576	442.371	414.929	549.579	442.737	461.398	431.394	467.984	474.204	555.799	504.208	458.105	534.211	485.181	648.738	527.259	506.769	491.767	592.389	594.219	572.631	638.127	556.897	557.629	567.142	567.142	567.508
Nit1	1000	1009.46	1016.01	1131	1056.04	928.675	890.102	965.066	795.488	886.463	921.397	1002.91	954.148	1114.26	995.633	898.836	1019.65	844.25	1117.18	868.268	981.805	755.459	1045.85	928.675	1069.14	1118.63	923.581	932.314	923.581	907.569	889.374
Pfdn2	1000	3154.34	3755.63	3890.68	3762.06	3347.27	3215.43	4265.27	3683.28	3165.59	3466.24	3773.31	3456.59	3882.64	3890.68	3236.33	3953.38	3229.9	3929.26	4006.43	3723.47	3578.78	4098.07	3636.66	4041.8	4940.51	4036.98	4075.56	4411.58	4202.57	4811.9
Klhdc9	1000	159.486	148.553	192.283	209.003	132.476	130.547	179.421	172.99	135.691	147.91	116.399	114.469	158.842	118.971	116.399	188.424	176.849	221.865	192.283	187.781	151.768	185.852	191.64	209.646	195.498	136.334	133.762	193.569	167.203	159.486
Pvrl4	1000	101.884	114.155	114.155	126.142	112.158	97.6027	84.1895	74.4863	103.025	91.895	97.032	95.0342	131.564	128.425	114.441	42.2374	38.8128	41.6667	48.8014	40.2397	61.3584	91.0388	42.2374	51.0845	59.6461	43.6644	30.8219	36.5297	42.8082	74.4863
Arhgap30	1000	43.6817	51.2592	49.0305	44.3503	36.3272	41.676	43.236	42.3446	42.7903	37.6644	41.8988	40.5616	48.1391	47.2476	41.8988	48.8077	38.5558	54.8251	44.7961	51.9278	50.3677	52.8193	44.1275	42.7903	63.294	50.5906	46.579	39.4473	54.6022	48.8077
Usf1	1000	1192.12	1289.66	1445.32	1342.36	1221.67	1142.36	1064.04	935.961	1258.62	1233	1214.29	1285.71	1545.32	1425.12	1240.39	1112.32	1076.85	1307.39	1099.01	1100	1042.86	1315.76	1131.53	1250.74	1377.83	1020.2	1111.82	1092.61	1128.08	1169.46
Tstd1	1000	56.2613	70.7804	81.6697	65.3358	58.0762	70.7804	49.0018	27.2232	68.9655	68.9655	74.4102	61.706	116.152	123.412	63.5209	27.2232	29.0381	49.0018	21.7786	39.9274	21.7786	58.0762	23.5935	49.0018	52.6316	43.5572	54.4465	56.2613	39.9274	29.0381
F11r	1000	110.798	127.72	146.253	134.166	104.754	177.679	123.691	113.215	122.885	119.259	107.172	114.827	132.151	119.662	90.2498	144.641	133.36	427.478	114.827	142.627	129.331	160.757	289.686	321.112	194.198	311.845	156.326	142.224	147.865	122.482
Alyref2	1000	128.044	141.398	168.107	170.463	130.401	113.904	107.62	93.48	121.76	133.543	137.471	136.685	169.678	148.468	122.545	143.755	106.049	143.755	154.753	153.967	129.615	181.461	160.251	164.179	127.258	120.189	94.2655	123.331	127.258	138.256
Itln1	1000	0	0	0	0	0	0	0	0	0.877963	0	0	0	0.877963	0	0	0	0	0	0	0	0	0	0	0	0	0	0	0	0	0
Cd244	1000	0.532198	0.266099	0.532198	0.266099	0.266099	1.33049	0	0.532198	1.0644	0.532198	0.532198	0	0.532198	1.0644	0.798297	0.266099	0.266099	0	0.266099	0	0.532198	0.798297	0.266099	0	1.0644	0.798297	0.532198	1.0644	0	0.532198
Ly9	1000	2.31571	9.64878	10.4207	5.01737	3.85951	6.56117	11.1926	6.56117	7.71903	4.63142	9.26283	9.26283	5.01737	5.40332	5.01737	8.49093	9.64878	13.8942	8.87688	12.7364	16.5959	16.9819	11.5785	12.3504	15.0521	11.1926	14.6662	9.64878	6.17522	10.0347
Slamf7	1000	0	0.502892	1.00578	0.251446	0	0.251446	0	1.25723	0	1.50867	0.754337	0.251446	0	0.754337	0	0.251446	0	1.00578	0.502892	0	0.754337	0	0.502892	1.25723	1.00578	3.01735	0.251446	0.251446	0	0.251446
Mir7683	1000	0	0	0	0	0	0	0	0	0	0	0	0	0	0	0	0	0	0	0	0	0	0	0	0	0	0	0	0	0	0
Cd48	1000	20.1401	25.394	28.8967	20.1401	20.1401	27.1454	21.8914	14.8862	26.2697	21.0158	17.5131	41.1559	14.0105	25.394	27.1454	20.1401	17.5131	25.394	20.1401	36.7776	28.8967	35.0263	54.2907	43.7828	45.5342	34.1506	24.5184	31.5236	34.1506	33.275
Slamf1	1000	1.86012	0.744048	2.97619	0.744048	1.11607	0.744048	4.83631	5.58036	2.60417	1.11607	1.4881	2.97619	2.23214	0.372024	1.4881	1.4881	0.372024	1.4881	1.86012	2.23214	3.72024	1.86012	1.4881	2.23214	4.09226	2.23214	0.372024	1.11607	2.23214	2.60417
Cd84	1000	22.3893	27.027	24.7881	25.4278	22.5492	23.9885	25.2679	19.8305	27.187	19.3507	20.1503	21.5896	23.8286	30.8652	22.7091	28.9461	27.8266	35.503	22.869	38.7014	29.7457	35.9827	34.5434	27.187	45.5781	33.5839	27.8266	27.3469	28.6263	28.1465
Slamf6	1000	3.684	3.27466	4.09333	4.91199	5.73066	5.73066	2.456	4.09333	4.09333	2.456	3.27466	4.91199	4.09333	2.86533	0.818666	6.13999	4.50266	4.09333	2.456	4.09333	6.95866	9.00532	5.32133	7.77732	7.77732	9.00532	4.09333	3.27466	5.32133	3.684
Vangl2	1000	185.841	152.212	212.389	195.575	156.195	160.177	142.035	146.46	153.982	129.646	161.947	184.071	194.248	174.779	149.115	97.3451	104.425	122.566	124.336	112.832	123.451	153.54	130.973	143.363	166.372	111.062	128.319	111.947	127.434	151.327
Nhlh1	1000	27.3422	22.5171	38.1986	27.3422	18.4962	18.4962	14.0732	7.63973	27.3422	20.5066	51.8697	72.3764	68.3554	36.5903	57.499	0	0.804182	0.402091	6.83554	0.402091	7.63973	0.402091	0	2.01045	8.846	3.61882	1.20627	0.402091	0.804182	14.0732
Ncstn	1000	1039.93	1035.38	1181.09	1090.37	994.046	989.842	1044.48	962.872	967.075	938.354	991.944	1008.41	1225.92	1139.05	1005.6	1050.79	1034.68	1364.27	1050.79	1023.12	934.851	1149.56	1244.13	1297.02	1321.19	1122.59	1018.21	1000.7	1065.85	1092.47
Copa	1000	2524.3	2501.62	2639.23	2701.88	2446.1	2261.4	2438.54	2266.36	2421.69	2224.67	2099.81	2244.55	2584.79	2526.03	2148.41	2423.2	2257.94	2670.34	2426.01	2298.98	2182.54	2879.89	2475.91	2638.58	2930.22	2112.12	2090.3	1995.03	2069.99	2441.13
Pex19	1000	1195.46	1172.47	1347.17	1269.88	1123.92	1124.56	1150.75	1030.02	1144.36	1122.01	1133.5	1180.13	1360.91	1166.08	1102.84	1168	1046.63	1292.88	1152.03	1187.8	1129.99	1407.22	1215.59	1277.87	1427.66	1074.74	1058.45	1064.52	1101.88	1259.98
Dcaf8	1000	2103.13	2100.45	2369.49	2400.48	2020.3	1932.41	2071.6	1784.93	1967.41	1950.04	2021.91	2037.94	2499.87	2214.27	1982.1	2112.48	1909.16	2289.87	2056.1	2061.45	1917.71	2423.72	2179.27	2308.58	2485.17	1945.77	1940.69	1937.22	2034.46	2160.3
Pea15a	1000	10420.7	11522	10308.4	10436	10141.3	9333.87	8808.24	8480.42	10212.4	10429.1	9327.01	10426.3	11122.7	10534.9	9023.42	10406.9	9210.74	10784.4	9764.63	10393.6	9336.7	12090	10146.1	10020.6	14220	8673.4	9241.42	9247.07	9979.81	9366.17
Casq1	1000	11.206	26.1473	11.7396	15.4749	19.7439	10.1387	12.8068	10.1387	11.206	23.4792	18.143	20.2775	6.93703	24.5464	10.1387	47.492	33.0843	52.2946	48.0256	45.8911	27.2145	60.2988	43.2231	46.4248	67.2359	37.3533	42.1558	41.6222	42.1558	25.08
Atp1a4	1000	0.286944	0	0.286944	0.286944	0	0	0.860832	0.573888	0	0	0.860832	0	0	0	0	1.14778	0	1.14778	0	0.286944	0.286944	0	1.14778	0.286944	0.573888	1.14778	0.286944	0.286944	0.286944	0.286944
Atp1a2	1000	7191.42	7575.72	8492.21	8468.93	6603.98	7149.19	9538.14	6794.44	6749.48	7842.94	8618.44	8299.98	9650.55	8306.73	7204.43	7559.5	6526.58	7763.61	7034.85	7231.25	7152.24	9044	7407.26	7520.64	9708.85	8807.13	8032.44	7482.25	8747.71	8796.05
Igsf8	1000	4749.55	4525.54	5142.47	4926.52	4487.01	4247.76	4830.2	4281.81	4193.1	4505.82	4382.17	4269.71	5353.94	4754.03	4325.72	3740.59	3758.06	4061.83	3938.62	3665.32	3437.72	4319.44	3552.42	4205.65	4672.94	3530.02	3917.56	4107.97	4263.44	4527.33
Kcnj9	1000	1182.87	1272.48	1412.54	1583.79	1172.17	1164.53	2204.89	1851.07	1141.59	1373.7	1391.44	1298.17	1591.13	1393.58	1272.17	658.104	583.18	688.991	1047.09	630.581	1255.35	1216.51	652.599	1021.71	1276.45	735.168	752.294	494.19	677.064	1491.13
Kcnj10	1000	1411.87	1869.06	1664.51	1660.07	1446.46	1368.04	1763.08	1338.08	1368.41	1554.47	1831.14	1763.08	1818.94	1935.08	1571.48	2009.62	1715.55	1890.88	1812.47	1903.46	1976.7	2535.79	1864.25	1929.54	2649.34	2187.53	1886.07	1899.39	2207.32	2315.89
Pigm	1000	118.113	122.341	116.66	130.797	108.997	103.58	101.334	94.3321	103.977	99.749	116.396	121.284	124.851	127.494	106.883	141.102	134.496	138.063	114.282	132.778	113.489	136.346	116.66	140.177	156.692	124.983	121.02	121.284	114.678	118.113
Slamf9	1000	23.5808	24.4541	22.7074	21.8341	28.821	31.441	37.5546	48.0349	28.821	26.2009	24.4541	25.3275	34.0611	33.1878	36.6812	61.1354	41.048	84.7162	42.7948	41.9214	32.3144	54.1485	55.0218	42.7948	63.7555	53.2751	40.1747	45.4148	48.0349	37.5546
Igsf9	1000	47.0699	39.7741	41.4215	40.2448	27.5359	31.3015	45.4225	32.4782	36.2438	41.8922	56.4839	64.4858	43.3043	41.1862	45.4225	81.1956	102.142	101.2	57.6606	87.55	47.5406	74.3704	72.723	81.4309	76.4886	100.494	132.266	158.861	167.804	86.6086
Tagln2	1000	230.825	253.256	283.647	238.061	248.915	229.378	232.996	222.865	227.931	227.207	261.939	252.533	295.948	272.793	206.946	217.077	283.647	257.598	240.955	269.899	222.142	293.054	236.614	322.721	301.013	290.159	385.673	337.916	384.226	248.915
Cfap45	1000	43.3589	43.3589	32.382	37.8705	39.517	75.7409	59.8244	60.9221	53.787	60.3732	27.9912	81.7783	25.247	63.6663	36.7728	43.9078	97.6948	105.928	71.3502	90.011	42.2613	85.6202	95.4995	144.347	92.2064	66.9594	90.5598	88.3644	98.7925	66.9594
4933439K11Rik	1000	5.3135	4.2508	3.1881	1.0627	0	1.0627	4.2508	4.2508	2.1254	3.1881	2.1254	4.2508	1.0627	12.7524	2.1254	5.3135	2.1254	14.8778	3.1881	6.3762	1.0627	2.1254	5.3135	7.43889	4.2508	6.3762	7.43889	2.1254	4.2508	3.1881
Vsig8	1000	6.38638	9.57956	13.8371	10.644	13.3049	10.1118	5.32198	6.91857	12.2406	6.91857	13.8371	12.7728	17.5625	11.7084	11.1762	18.0947	21.2879	20.2235	22.8845	24.4811	14.9015	22.3523	23.9489	23.9489	26.0777	6.38638	7.98297	10.644	12.2406	9.57956
Slamf8	1000	3.43137	3.92157	2.94118	5.39216	4.41176	2.45098	3.43137	3.43137	3.43137	3.92157	2.94118	3.43137	5.88235	5.39216	1.96078	6.86275	2.94118	5.88235	7.35294	6.37255	5.39216	10.7843	7.35294	12.7451	9.31373	9.80392	4.90196	3.92157	9.31373	4.41176
Fcrl6	1000	1.04493	4.17973	1.04493	2.61233	3.65726	2.08986	1.04493	2.08986	0.522466	2.61233	4.17973	1.04493	1.04493	1.04493	0	2.08986	2.61233	3.65726	4.17973	2.08986	0.522466	2.08986	5.22466	1.04493	7.83699	1.04493	1.5674	2.08986	1.04493	1.04493
Dusp23	1000	174.312	234.298	244.884	181.369	203.246	153.846	175.723	142.555	208.186	159.492	172.9	194.778	224.418	207.481	182.781	130.558	134.792	167.255	129.146	146.083	127.735	144.672	130.558	132.675	189.838	105.152	95.2717	124.206	120.677	112.915
Crp	1000	0	2.94464	119.552	0.588928	2.35571	0.588928	2.94464	0	194.935	33.5689	4.71143	14.1343	118.375	3.53357	77.7385	0	2.35571	44.7585	0	1.17786	0	0.588928	0	11.1896	21.2014	17.0789	4.71143	1.17786	2.94464	1.76678
Apcs	1000	0	0	97.561	0	1.01626	0	2.03252	1.01626	113.821	22.3577	3.04878	6.09756	45.7317	4.06504	19.3089	0	0	26.4228	0	1.01626	1.01626	0	0	1.01626	5.0813	2.03252	1.01626	0	0	0
Olfr16	1000	0	0	0	0	0	0	0	0	0	0	0	0	0	0	0	0	0	0	0	0	0	0	0	0	0	0	0	0	0	0
Olfr1408	1000	0	0	0	0	0	0	0	0	0	0	0	0	0	0	0	0	0	0	0	0	0	0	0	0	0	0	0	0	0	0
Olfr1406	1000	0	0	0	0	0	0	0	0	0	0	0	0	0	0	0	0	0	0	0	0	0	0	0	0	0	0	0	0	0	0
Olfr218	1000	0	0	0	0	0	0	0	0	0	0	0	0	0	0	0	0	0	0	0	0	0	0	0	0	0	0	0	0	0	0
Olfr1404	1000	0	0	0	0	0	0	0	0	0	0	0	0	0	0	0	0	0	0	0	0	0	0	0	0	0	0	0	0	0	0
Fcer1a	1000	0	0	0	0	0.974659	0	0	0	0	0	0	0	0	0	0	0	0	0	0	0	0	0	0	0	0	0	0	0	0	0
Olfr418	1000	0	0	0	0	0	0	0	0	0	0	0	0	0	0	0	0	0	0	0	0	0	0	0	0	0	0	0	0	0	0
Mptx2	1000	0	0	0	0	0	1.44092	0	0	0	0	0	0	0	0	0	1.44092	1.44092	0	0	0	0	0	0	0	0	0	0	0	0	0
Ackr1	1000	1389.46	1268.57	1315.2	1225.39	1205.53	1221.93	1392.06	1316.93	1200.35	1122.63	1542.31	1431.78	1481	1477.55	1347.15	1684.8	1484.46	1714.16	1564.77	1584.63	1489.64	1685.66	1628.67	1751.3	1746.98	1721.93	2032.82	1974.09	2036.27	1975.82
Cadm3	1000	5328.44	5015.15	5411.64	4894.93	4992.55	4753.79	5326.76	4942.29	4893.24	4738.16	4314.5	4552.54	5233.47	4943.02	4153.4	4996.87	5014.19	5272.42	4992.55	4949.27	4365.71	5751.14	5208.94	5456.84	5421.26	4236.84	4778.31	4364.03	4648.47	5074.06
Aim2	1000	114.308	124.951	130.469	117.856	116.279	90.2641	62.2783	55.9716	94.2058	91.0524	101.301	99.3299	119.827	108.79	107.607	134.017	141.9	145.053	109.578	160.82	102.877	150.177	141.506	130.469	187.229	121.797	130.863	164.762	184.076	122.586
BC094916	1000	0	0	0	0	0	0	0	0.772798	0	0	0	0	0	0	0.772798	0	0	0	0	0	0	0	0	0	0.772798	0.772798	0	0	0	0
Pydc4	1000	0.373134	0.746269	0.746269	0.746269	0	0	0	0	0	0.373134	0	0.373134	0	0.373134	0.373134	0	0	0	0	0	0.746269	0.373134	0.373134	0	0	0.373134	1.49254	0	0.373134	0
Pyhin1	1000	1.4298	1.14384	5.71919	2.28768	1.4298	2.00172	1.71576	2.00172	0	1.4298	1.14384	3.14555	1.4298	4.28939	4.86131	3.43151	2.00172	6.00515	1.14384	3.14555	2.28768	5.71919	2.00172	2.85959	2.85959	4.28939	2.85959	1.4298	4.28939	4.28939
Pydc3	1000	1.00435	1.67392	3.68262	1.33914	1.00435	1.67392	1.00435	2.0087	4.01741	0.334784	0.334784	2.0087	0.334784	1.33914	1.33914	0.669568	0.334784	3.68262	1.00435	1.33914	0	0.334784	1.00435	0.669568	2.34349	3.01306	1.33914	0	1.67392	0
AI607873	1000	1.43554	3.1582	3.73241	3.1582	2.00976	4.59374	6.31639	2.29687	3.73241	2.87109	1.14844	5.16796	2.58398	2.58398	1.43554	1.72265	1.43554	5.16796	0.574218	0.287109	2.58398	0.574218	2.58398	4.01952	4.59374	4.01952	2.58398	0	1.72265	2.58398
Ifi204	1000	6.97168	3.05011	11.329	4.3573	2.17865	9.15033	7.40741	3.48584	6.10022	3.92157	4.3573	7.40741	4.3573	3.48584	10.8932	5.22876	3.92157	8.7146	6.53595	3.92157	5.66449	8.7146	4.79303	10.8932	5.22876	11.7647	5.22876	1.74292	2.61438	2.61438
Mndal	1000	196.541	105.87	117.4	155.136	147.799	164.046	20.9644	20.9644	135.744	120.021	112.159	155.136	162.474	97.4843	105.346	13.6268	8.38574	20.4403	9.95807	7.86164	11.5304	9.43396	10.4822	14.1509	16.7715	16.2474	11.5304	8.38574	8.90985	16.7715
Mnda	1000	0.558971	1.67691	2.23589	2.23589	0	3.9128	3.35383	1.11794	1.11794	2.23589	2.23589	1.67691	1.67691	1.11794	3.35383	1.11794	1.67691	2.23589	0	1.67691	1.11794	1.11794	4.47177	2.79486	0	2.79486	3.35383	1.11794	0.558971	0.558971
Ifi203	1000	104.273	35.5755	65.0174	70.9466	62.9728	79.7383	10.8362	9.40503	56.0213	48.8653	63.7906	64.6085	88.3255	49.0697	40.4825	6.33817	5.92926	9.20057	5.31589	5.11143	7.36046	5.11143	8.99612	7.56492	8.99612	11.8585	7.76937	3.68023	7.76937	5.7248
Ifi202b	1000	0	0.556793	0	0	0	0	0	0	0.556793	0	0	0	0	0	0	0	0	0	0	0	0	0	0	0	0	0	0	0	0	0
Ifi205	1000	0	0	0	0	0	0	0	0.619963	0.619963	0	0	0	0.619963	0	0	0	0	0	0	0	0	1.23993	0	0.619963	0	0.619963	0	0	0	0
Olfr433	1000	0	0	0	0	0	0	0	0	0	0	0	0	0	0	0	0	0	0	0	0	0	0	0	0	0	0	0	0	0	0
Olfr432	1000	0	0	0	0	0	0	0	0	0	0	0	0	0	0	0	0	0	0	0	0	0	0	0	0	0	0	0	0	0	0
Olfr430	1000	0	0	0	0	0	0	0	0	0	0	0	0	0	0	0	0	0	0	0	0	0	0	0	0	0	0	0	0	0	0
Olfr429	1000	0	0	0	0	0	0	0	0	0	0	0	0	0	0	0	0	0	0	0	0	0	0	0	0	0	0	0	0	0	0
Olfr426	1000	0	0	0	0	0	0	0	0	0	0	0	0	0	0	0	0	0	0	0	0	0	0	0	0	0	0	0	0	0	0
Olfr427	1000	0	0	0	0	0	0	0	0	0	0	0	0	0	0	0	0	0	0	0	0	0	0	0	0	0	0	0	0	0	0
Olfr231	1000	0	0	0	0	0	0	0	0	0	0	0	0	0	0	0	0	0	0	0	0	0	0	0	0	0	0	0	0	0	0
Olfr424	1000	0	0	0	0	0	0	0	0	0	0	0	0	0	0	0	0	0	0	0	0	0	0	0	0	0	0	0	0	0	0
Olfr421-ps1	1000	0	0	0	0	0	0	0	0	0	0	0	0	0	0	0	0	0	0	0	0	0	0	0	0	0	0	0	0	0	0
Olfr420	1000	0	0	0	0	0	0	0	0	0	0	0	0	0	0	0	0	0	0	0	0	0	0	0	0	0	0	0	0	0	0
Spta1	1000	0.118977	0.594884	0	0.118977	0.118977	0.475907	0	0	0.237954	0.35693	0	0.237954	0.35693	0.118977	0	0.118977	0.118977	0	0.118977	0.475907	0.118977	0.35693	0.237954	0	0.35693	0	0	0.118977	0	0
Olfr419	1000	0	0	0	0	0	0	0	0	0	0	1.83824	0	0	0	0	0	0	0	0	0	0	0	0	0	0	0	0	0	0	0
Mptx1	1000	0	0	0	0	0	0	0	0	0	0	0	0	0	0	0	0	0	0	0	0	0	0	0	0	0	0	0	0	0	0
Olfr417	1000	0	0	0	0	0	0	0	0	0	0	0	0	0	0	0	0	0	0	0	0	0	0	0	0	0	0	0	0	0	0
Olfr248	1000	0	0	0	0	0	0	0	0	0	0	0	0	0	0	0	0	0	0	0	0	0	0	0	0	0	0	0	0	0	0
Olfr414	1000	0	0	0	0	0	0	0	0	0	0	0	0	0	0	0	0	0	0	0	0	0	0	0	0	0	0	0	0	0	0
Olfr220	1000	0	0	0	0	0	0	0	0	0	0	0	0	0	0	0	0	0	0	0	0	0	0	0	0	0	0	0	0	0	0
Fmn2	1000	774.138	708.32	816.051	788.42	710.804	665.632	716.858	666.097	677.74	625.582	649.798	678.206	849.115	728.5	622.012	659.733	622.788	640.95	651.351	656.784	586.619	719.342	615.958	684.88	827.228	558.367	609.283	583.67	628.221	675.411
Grem2	1000	163.952	162.35	162.884	157.276	176.502	164.219	279.84	314.553	179.973	159.947	144.726	170.628	200.267	171.696	121.762	420.027	346.061	403.738	355.674	385.848	293.725	432.043	381.842	404.539	402.403	336.182	442.19	394.126	405.874	408.812
Rgs7	1000	1636.51	1358.26	1616.41	1650.99	1398.87	1309.21	1670.29	1439.89	1320.06	1276.64	1481.3	1457.18	1788.1	1451.15	1442.3	1181.75	1011.66	1113.39	1139.93	1102.94	986.731	1296.74	1082.43	1196.22	1249.7	979.895	1123.44	1117.01	1086.85	1296.34
Fh1	1000	1598.65	1659.31	1771.45	1738.36	1582.11	1466.3	1657.48	1437.5	1566.18	1522.06	1642.16	1481.62	1772.06	1604.17	1468.75	1870.1	1545.34	1972.43	1708.33	1781.86	1523.28	2147.67	1772.67	1936.27	1879.29	1746.32	1612.13	1705.27	1623.16	1878.68
Kmo	1000	1.20096	3.20256	66.4532	5.60448	3.20256	1.20096	0.800641	0.800641	73.2586	12.0096	1.60128	9.60769	73.2586	12.0096	45.6365	0	2.80224	14.8118	0	2.80224	0.40032	7.60608	0.800641	4.40352	9.20737	9.60769	0.800641	0.40032	4.0032	1.60128
Opn3	1000	13.0017	22.0464	16.3934	51.4415	20.9158	23.7422	143.019	148.672	24.3075	33.3522	22.0464	17.524	22.0464	29.3951	17.524	89.316	102.318	117.581	99.4912	119.276	88.1854	180.328	77.4449	88.1854	118.146	78.5755	134.539	107.971	121.538	109.101
Chml	1000	46.4356	62.7861	51.0137	82.4068	52.9758	50.3597	140.778	129.006	59.6795	63.7672	57.881	49.2152	53.1393	60.6606	46.2721	140.124	99.4114	113.473	132.112	124.755	126.063	193.591	123.937	122.466	162.525	112.001	124.591	116.743	130.641	130.968
Wdr64	1000	0	0	0	0	0.524109	0	0.262055	0.262055	0	0	0	0	0	0	0	0	0	0	0	0.262055	0.262055	0	0	0	0	0	0	0	0.524109	0.524109
Exo1	1000	3.08754	3.45078	4.72212	3.6324	5.4486	3.26916	3.08754	5.26698	2.90592	1.63458	3.08754	1.45296	3.08754	2.90592	3.08754	5.63022	6.71994	6.53832	6.3567	7.2648	5.99346	10.534	6.71994	8.53614	9.44424	5.26698	6.90156	7.08318	6.53832	4.5405
Becn2	1000	0	0.558971	0	0	0	0	0	0	0	0	0.558971	0	0	0	0	1.11794	2.23589	2.23589	2.79486	1.67691	0	0.558971	0.558971	1.67691	1.11794	0.558971	1.67691	0	1.11794	1.11794
Pld5	1000	26.1941	22.5989	23.3693	16.9492	24.1397	21.5716	32.6143	48.793	26.1941	17.4628	27.4782	36.4664	24.9101	24.9101	15.1515	299.949	211.608	287.108	247.047	265.537	251.156	252.696	284.284	252.953	226.502	248.074	212.378	267.591	251.412	222.393
Cep170	1000	686.147	686.291	703.03	718.615	648.052	554.545	577.633	566.234	694.228	590.476	581.097	560.75	703.463	661.328	543.434	690.476	739.394	745.31	681.962	721.645	572.872	831.025	686.147	717.172	887.734	543.723	642.857	651.659	683.983	657.143
Mir350	1000	0	0	20.202	20.202	0	0	0	0	0	0	0	0	0	0	0	0	30.303	0	0	0	10.101	10.101	10.101	0	10.101	0	0	0	0	0
Sdccag8	1000	332.371	369.542	378.564	386.864	324.792	304.944	289.426	269.939	309.275	306.748	322.988	297.366	359.076	317.575	290.509	371.346	337.062	405.63	328.401	337.784	292.674	356.911	340.31	382.173	440.635	268.856	323.349	291.231	309.996	308.192
Hmga2-ps1	1000	18.543	34.4371	27.8146	28.4768	33.7748	26.4901	35.0993	29.1391	31.1258	25.8278	40.3974	27.8146	39.7351	38.4106	25.8278	26.4901	33.1126	29.1391	29.8013	32.4503	30.4636	46.3576	51.6556	33.1126	36.4238	50.9934	34.4371	42.3841	38.4106	29.1391
Akt3	1000	2751.64	2239.92	2579.94	2754.38	2429.99	2294.61	1478.35	1427.46	2216.47	1898.84	2062.94	2250.69	2953.12	2398.73	2210.56	1670.96	1479.41	1580.36	1548.89	1547.41	1507.71	1711.51	1540.23	1618.8	1863.99	1486.38	1635.9	1479.83	1586.69	1756.28
Zbtb18	1000	6866.82	5675.87	6984.72	6892.48	6307.29	5705.64	3687.62	3040.74	5432.63	4733.45	6832.75	6624.95	9103.21	7168.43	7187.82	1142.58	931.061	1122.8	1575.79	1090.87	1636.31	1135.92	1085	1521.35	1875.44	1598.51	1718.17	1460.44	1448.49	2457.5
2310043L19Rik	1000	0	1.43266	0	0	0	0	4.29799	5.73066	0	0	2.86533	0	0	2.86533	1.43266	0	0	0	0	0	0	0	0	0	0	0	0	0	0	0
1700016C15Rik	1000	0	0	0	0	0	0	0	2.67023	1.33511	0	0	1.33511	0	0	0	0	5.34045	4.00534	1.33511	4.00534	0	1.33511	2.67023	10.6809	1.33511	5.34045	4.00534	1.33511	6.67557	0
Adss	1000	1600.47	1531.14	1708.58	1792.01	1579.32	1441.83	1690.95	1460.24	1481.39	1567.96	1597.73	1564.04	1861.34	1670.98	1489.62	1689.78	1542.5	1740.7	1682.73	1755.19	1526.83	1820.21	1797.49	1810.03	2113.59	1628.28	1894.24	1779.48	1911.48	2012.14
Gm16432	1000	22.2489	28.8635	31.2688	29.4648	24.6542	16.837	20.445	23.4516	21.0463	19.2423	21.6476	34.8767	30.0661	21.0463	18.0397	39.6873	49.9098	52.9164	24.6542	39.086	15.6344	27.0595	33.6741	33.0728	35.4781	27.6609	34.8767	25.8569	36.6807	22.8503
Desi2	1000	268.93	307.145	287.918	306.195	254.925	264.182	248.516	222.407	242.82	268.93	313.553	316.639	354.379	322.336	295.277	353.192	325.896	385.948	288.63	314.503	265.844	349.157	342.749	350.344	354.617	308.569	324.947	327.083	346.546	316.876
Cox20	1000	1279.02	1205.36	1482.14	1464.29	1174.11	1151.79	1035.71	875	1111.61	1390.62	1220.98	1292.41	1457.59	1098.21	1008.93	1924.11	1674.11	2383.93	1575.89	1948.66	1508.93	1859.38	2238.84	2305.8	2125	1618.3	1792.41	1667.41	1758.93	1504.46
Hnrnpu	1000	6254.5	5583.65	6583.38	6736.78	5771.66	5447.41	5570.3	4993.73	5377.93	5249.05	5869.75	5815.26	7268.12	6144.41	5497.82	5976.29	5817.71	6511.99	5589.1	6076.02	4952.32	6304.9	5641.69	6373.84	7047.96	5690.74	6182.29	6200.82	6483.65	6185.29
Efcab2	1000	212.766	236.801	206.856	205.28	202.916	187.943	182.821	162.333	202.916	208.432	174.941	198.582	206.068	217.494	195.429	260.835	247.045	287.628	241.529	325.059	258.471	312.845	306.541	313.633	371.552	235.619	247.045	257.289	303.388	215.13
Kif26b	1000	158.925	82.2306	149.338	157.71	97.3535	113.151	42.128	45.2336	127.734	84.7961	69.9433	121.793	146.503	90.0621	73.9941	106.67	121.523	118.958	77.7748	93.9779	54.8204	122.468	102.755	93.7078	87.2266	63.4621	80.0702	70.6184	89.9271	64.1372
Smyd3	1000	262.43	249.934	274.927	275.193	250.731	218.027	321.723	336.878	242.223	231.587	204.733	221.484	270.673	250.731	204.733	412.39	421.165	441.638	359.479	454.135	290.88	415.315	412.922	423.558	434.725	372.241	466.631	466.631	458.389	432.598
Tfb2m	1000	314.134	265.931	329.657	325.163	290.85	257.353	238.562	244.69	272.059	246.324	269.199	286.356	334.15	326.389	281.863	355.801	303.922	405.229	332.516	336.193	297.794	371.324	366.83	350.082	382.353	334.559	311.275	352.124	345.588	382.761
Cnst	1000	462.706	471.507	504.51	533.993	434.103	507.591	442.464	438.284	430.583	447.525	450.825	497.91	525.633	481.408	435.204	1218.7	1169.86	1458.75	1036.08	1138.17	884.488	1277.23	1355.56	1234.32	1103.19	1284.49	1341.03	1317.05	1317.05	1081.85
Sccpdh	1000	1218.52	1813.74	1363.68	1451.61	1527.06	1266.39	1707.08	1745.06	1356.4	1547.35	1242.98	1309.05	1323.1	1579.6	1259.63	2030.7	1679.5	2186.78	1969.82	2266.91	1956.3	2484.39	2138.92	2003.64	2785.12	1710.72	1638.92	1713.84	1862.12	1923.52
Ahctf1	1000	411.392	405.05	474.805	450.912	362.247	381.384	321.368	297.135	378.779	341.298	390.103	406.975	498.698	426.566	380.591	555.316	591.326	635.828	500.17	533.575	390.896	575.812	591.892	567.093	605.594	440.947	553.731	516.25	525.988	474.578
Cdc42bpa	1000	2324.28	2400.07	2437.27	2550.14	2243.53	1989.95	2042.28	1820.36	2025.65	2039.16	2244.8	2327.17	2664.97	2462.22	2131.82	2493.07	2225.51	2384.59	2225.28	2433.69	2138.52	2558.69	2216.84	2331.79	2872.11	2094.15	2220.43	2197.67	2296.33	2179.53
Adck3	1000	609.421	570.412	800.785	573.356	566.241	539.254	435.476	383.955	636.899	539.5	526.987	601.325	747.301	648.43	582.679	513.739	482.336	622.179	470.559	518.891	445.78	597.154	519.627	522.816	561.089	446.271	511.776	471.05	512.758	494.112
Psen2	1000	318.618	384.837	537.908	351.727	320.058	307.102	366.603	310.461	379.079	385.317	334.453	338.292	443.378	363.244	375.24	290.307	268.714	392.994	295.106	290.307	278.311	372.361	313.82	399.712	368.522	318.138	249.04	263.916	294.146	288.388
Gm5069	1000	123.15	99.4136	123.988	116.448	94.387	104.161	52.7786	46.635	86.568	85.7302	104.999	108.908	137.95	85.451	94.9455	40.7707	31.2762	45.7973	40.7707	37.4197	52.2201	41.3292	37.4197	41.8877	40.4915	41.8877	35.7442	32.1139	37.699	43.8425
Itpkb	1000	398.745	315.036	380.318	401.294	326.211	410.508	217.604	186.238	325.818	303.078	281.906	458.538	436.385	423.446	334.052	247.206	240.149	430.896	231.719	262.89	245.834	388.551	337.777	403.058	259.753	435.601	206.822	175.848	273.476	236.228
6330403A02Rik	1000	5175.08	4857.1	5286.72	5211.38	5159.68	4961.26	2389.81	2608.05	4608.66	3677.44	4194.3	4612.17	6392.56	5386.3	4840.78	1974.53	1912.61	2079.91	1964.62	1935.03	1858.32	2398.96	2087.54	2022.27	2046.21	1289.61	1553	1487.88	1570.99	1931.98
Parp1	1000	1524.17	1494.64	1688.53	1643.32	1487.07	1378.63	903.58	864.123	1432.98	1345.44	1590.28	1602.04	2064.28	1950.88	1683.3	967.076	870.395	990.071	944.343	905.932	832.245	1089.63	972.041	1092.24	1146.33	876.927	1010.45	923.177	960.544	1071.86
Mir6904	1000	283.582	313.433	313.433	432.836	208.955	253.731	253.731	208.955	149.254	432.836	343.284	194.03	388.06	313.433	343.284	179.104	44.7761	134.328	59.7015	104.478	59.7015	89.5522	104.478	119.403	164.179	74.6269	134.328	89.5522	283.582	74.6269
Lin9	1000	64.557	50.6329	75	84.4937	47.7848	50.9494	57.2785	44.9367	62.6582	54.4304	69.3038	66.1392	66.4557	65.8228	58.5443	59.4937	62.0253	63.2911	61.3924	56.0127	59.1772	77.5316	67.4051	66.4557	86.3924	39.557	58.5443	50.9494	43.038	53.481
Mixl1	1000	0	0	0	0.873744	0	0.436872	0	0	0	0.873744	0	0	0	0.436872	0	0	0	0	0	0	1.31062	4.36872	0	0	0	0	0	0	0.436872	0
Acbd3	1000	486.027	521.464	545.088	556.612	474.503	477.96	487.468	456.065	467.589	480.841	471.334	468.741	556.9	494.094	458.657	543.071	517.142	568.136	518.583	553.731	490.061	669.26	561.798	597.234	602.132	492.653	479.113	454.336	508.211	522.616
H3f3a	1000	4268.59	4352.23	4809.48	4782.53	3973.05	4027.88	2913.57	2723.98	4051.12	3555.76	3943.31	3943.31	4739.78	4047.4	3963.75	5531.6	5278.81	6313.2	5007.43	5651.49	4335.5	5937.73	6061.34	5939.59	5768.59	4507.43	4817.84	5260.22	5293.68	4302.04
Sde2	1000	408.15	369.279	442.32	408.464	353.292	354.545	314.42	283.072	330.721	352.351	378.37	374.608	457.68	431.975	373.354	420.376	391.223	431.034	327.586	433.542	316.301	438.245	386.52	413.48	447.962	375.549	388.401	416.928	398.433	373.354
Lefty2	1000	7.72044	15.0345	12.5965	10.5648	7.72044	10.9711	0	4.46973	10.9711	9.75213	6.50142	7.3141	7.72044	8.12678	7.72044	0.812678	0.406339	0.812678	3.65705	0.406339	2.43803	1.21902	2.03169	2.03169	2.43803	1.21902	2.03169	0.812678	1.21902	3.25071
Pycr2	1000	652.283	681.676	841.776	814.884	659.787	644.778	569.731	461.538	662.914	674.797	834.897	798.624	903.064	927.455	851.157	661.038	684.178	762.351	664.79	646.654	594.747	751.094	684.803	829.268	696.06	656.035	627.892	622.889	676.673	726.704
Lefty1	1000	154.613	251.247	286.16	238.155	251.247	183.292	33.0424	19.3267	170.823	190.773	338.529	267.456	433.915	470.698	437.656	30.5486	23.0673	28.6783	27.4314	23.6908	31.1721	34.9127	24.9377	24.9377	47.3815	22.4439	33.6658	34.2893	43.0175	28.0549
Tmem63a	1000	378.512	899.352	440.877	476.073	610.374	382.525	586.91	465.267	480.704	694.968	555.727	767.521	489.657	1063.29	688.793	1020.99	826.798	1129.98	857.981	1079.35	1088.3	1144.49	1014.51	993.825	1500.15	1190.18	1074.41	1346.71	1472.06	1025.93
Ephx1	1000	599.399	680.48	775.976	592.793	572.372	860.06	460.06	350.751	612.012	611.411	675.676	751.351	960.36	819.219	820.42	693.694	765.766	2106.91	615.015	770.571	506.306	707.508	1335.14	1549.55	1030.03	1729.13	899.099	989.189	1090.09	878.679
9130409I23Rik	1000	0	0.52687	5.79557	0	0.52687	0	0	0	3.68809	0	0	1.05374	2.10748	0	5.2687	0	0	1.58061	0	0	0	0	0.52687	0.52687	1.05374	0.52687	0	0	0.52687	0
Nvl	1000	1061.76	800.327	1058.5	1087.58	872.549	832.68	783.66	693.464	905.556	772.222	924.837	904.575	1146.41	895.098	801.307	687.582	700.98	754.575	660.458	663.072	609.804	690.196	650.654	794.771	922.876	644.118	692.484	684.314	693.137	733.333
Cnih4	1000	472.766	578.029	556.304	541.616	508.262	461.444	507.65	402.693	441.86	504.284	512.24	554.468	549.266	563.341	497.246	635.863	578.641	712.362	600.673	627.907	591.493	725.214	681.457	703.488	823.133	628.213	649.021	619.951	640.759	642.289
Wdr26	1000	1184.48	1098.91	1287.21	1258.98	1107.42	1032.07	891.301	834.681	1038.46	950.333	1013.2	1082.16	1292.89	1150.56	979.566	1102.17	1053.21	1208.88	1027.67	1101.6	913.438	1174.26	1060.45	1119.48	1240.53	957.854	974.457	963.105	1025.54	984.674
Cnih3	1000	1394.21	1362.67	1676.57	1630.73	1382.47	1283.09	1052.44	1221.12	1392.01	1107.81	975.064	1088.38	1308.03	993.766	998.166	203.887	149.248	199.12	448.478	186.285	568.757	346.168	246.425	398.24	512.285	228.456	241.291	132.38	119.179	711.038
Ccdc121	1000	23.6394	22.5399	23.0896	16.4926	32.4354	13.7438	10.4453	12.6443	21.9901	26.9379	15.3931	42.8807	17.5921	18.1418	13.7438	17.0423	50.0275	32.4354	30.7861	41.2314	12.0946	34.6344	21.4404	62.122	50.5772	17.5921	52.2265	48.3782	45.0797	31.3359
Lbr	1000	203.266	252.534	243.525	210.023	179.336	195.101	228.604	173.142	183.84	201.014	215.372	219.032	255.349	242.399	209.459	186.937	193.131	254.505	203.829	200.732	198.48	232.827	190.315	215.09	292.23	214.527	193.412	204.673	209.459	230.574
Enah	1000	867.903	874.787	964.85	1019.36	858.751	801.247	689.722	601.037	779.542	775.978	799.708	870.009	1016.6	898.599	805.783	729.408	713.453	726.006	646.959	694.825	614.805	863.287	665.668	750.061	830.566	547.015	587.025	536.244	590.994	605.653
Srp9	1000	2067.72	2073.49	2213.98	2205.33	2003.6	1969.74	2000.72	1873.92	2089.34	1899.86	2034.58	1885.45	2346.54	2134.73	1896.97	1963.26	1829.25	2291.07	2126.8	2066.28	1926.51	2344.38	2260.09	2420.03	2395.53	1821.33	1761.53	1742.07	1783.86	2103.75
Vmn1r1	1000	0	0	0	0	0	0	0	0	0	0	0	0	0	0	0	0	0	0	0	0	0	0	0	0	0	0	0	0	0	0
Degs1	1000	1500.25	1991.02	1662.34	1688.28	1724.69	1582.04	1463.34	1350.62	1642.39	1714.21	1584.04	1669.83	1670.32	1994.01	1605.49	2662.84	2404.49	3501.75	2495.76	2718.7	2256.36	2911.72	3155.11	3088.78	3217.96	2685.79	2167.58	2361.6	2445.39	2317.71
1700047M11Rik	1000	384.84	879.009	424.198	444.606	552.478	322.157	470.845	390.671	472.303	737.609	514.577	622.449	384.84	811.953	542.274	690.962	658.892	775.51	568.513	784.257	718.659	822.157	741.983	683.673	1179.3	663.265	625.364	784.257	846.939	607.872
Fbxo28	1000	469.978	543.456	527.58	518.013	496.438	455.73	513.128	454.101	453.491	458.376	493.792	495.827	540.607	525.748	469.978	465.703	469.163	561.164	481.579	485.243	470.385	598.616	501.323	561.571	600.041	441.278	457.969	428.862	439.039	472.624
Trp53bp2	1000	434.783	456.751	457.666	433.867	398.169	385.584	318.078	257.437	419.222	418.535	445.538	455.149	572.998	511.442	415.789	479.405	456.522	628.833	452.86	534.096	413.501	561.556	524.027	566.59	653.776	559.497	457.895	565.675	617.62	462.471
Capn2	1000	903.611	1075.98	1065.93	1132.81	949.451	903.611	1083.52	885.086	883.203	1089.8	905.181	901.413	1041.13	1027	800	1353.53	1211.93	1412.87	1195.29	1251.49	1156.36	1564.21	1421.98	1381.79	1638.3	1345.68	1253.38	1307.69	1432.65	1351.65
Capn8	1000	0.269906	0.269906	0.809717	0	1.07962	0.539811	0.539811	0	0.539811	0.269906	0.269906	0	0.539811	0.269906	0.539811	0	0.809717	0.539811	0	0	0.539811	0.269906	0.269906	0.809717	0	0.269906	0.539811	0.269906	1.61943	0.809717
Ccdc185	1000	2.43309	1.94647	1.45985	0	2.43309	0	1.45985	0	0.486618	0	1.45985	0.486618	0	0.486618	0	0.486618	0	0	0.486618	0	0	0	0.486618	1.45985	0	0.486618	0	0	0	0
Susd4	1000	3079.61	2655.04	3286.98	3162.65	2787.22	2649.14	2503.69	2351.35	2669.78	2623.59	2621.13	2961.18	3526.78	2869.29	2713.51	1624.57	1654.05	1724.32	1688.45	1589.68	1684.03	1931.7	1676.66	1951.84	2250.12	1391.65	1457	1249.63	1478.13	1997.05
Tlr5	1000	6.87715	6.56455	8.44014	9.06533	5.31416	8.44014	8.44014	5.00156	7.81494	4.37637	7.18975	5.00156	5.93936	4.68897	4.68897	9.37793	7.18975	10.6283	4.06377	5.93936	5.00156	8.12754	5.62676	6.25195	9.69053	5.00156	5.31416	5.00156	5.93936	4.68897
Disp1	1000	53.9555	47.8111	54.9155	56.6436	46.0829	42.2427	57.9877	64.9002	49.1551	50.1152	48.1951	54.5315	60.4839	51.4593	48.0031	76.8049	88.7097	87.7496	62.596	75.0768	67.7803	83.5253	78.341	81.2212	83.9094	70.0845	75.6528	84.1014	80.2611	72.9647
Brox	1000	952.257	901.331	1000.87	1001.45	868.345	833.623	790.509	749.421	839.41	816.84	857.06	878.762	1000	942.13	839.41	1089.7	950.81	1148.44	980.035	1054.69	901.91	1249.13	1101.85	1099.54	1247.4	868.634	946.759	912.905	985.243	980.035
Aida	1000	563.316	610.689	605.831	637.413	594.291	526.268	594.595	570.301	567.568	549.043	554.51	538.718	610.993	580.626	467.659	620.711	565.746	648.649	610.386	612.815	589.128	666.262	604.009	660.492	785.606	501.063	595.506	543.577	563.316	623.747
Mia3	1000	853.731	855.214	939.92	934.728	875.093	798.25	782.673	734.164	786.53	758.493	763.092	818.276	1028.48	908.322	792.612	886.219	802.403	979.528	852.841	883.252	732.681	974.93	926.569	914.849	999.407	755.229	787.569	795.134	783.86	787.124
Taf1a	1000	267.526	252.619	295.729	329.976	246.575	257.454	252.216	230.862	227.236	266.317	285.254	289.686	326.35	296.132	278.002	253.828	264.706	310.234	221.193	259.065	209.106	279.21	247.784	280.419	315.068	240.129	246.978	272.361	283.239	257.454
Hhipl2	1000	8.91938	8.23328	9.26244	11.3208	6.51801	9.94854	8.23328	6.86106	4.45969	8.57633	10.2916	6.51801	13.036	8.57633	11.3208	11.3208	8.57633	14.7513	5.48885	9.94854	3.77358	7.54717	9.26244	12.3499	12.0069	7.89022	6.51801	8.91938	8.91938	6.86106
1700056E22Rik	1000	4.1365	4.1365	5.17063	1.03413	7.23888	2.06825	11.3754	1.03413	7.23888	4.1365	1.03413	3.10238	13.4436	6.20476	5.17063	6.20476	5.17063	4.1365	5.17063	11.3754	4.1365	9.30714	5.17063	4.1365	8.27301	3.10238	3.10238	2.06825	6.20476	6.20476
Dusp10	1000	86.2832	160.767	105.088	101.401	108.407	83.3333	147.493	110.251	99.1888	122.05	123.894	117.257	103.614	165.192	109.513	151.549	120.575	150.811	151.18	129.425	160.398	164.823	137.906	160.398	196.165	161.873	123.156	136.431	150.811	170.723
1700112H15Rik	1000	0	0	0	0	0	0	0	0	0	0	0	0	0	0	0	0	0	0	0	0	0	0	0	0	0	0	0	0	0	0
4930488B22Rik	1000	0	0	0	0	0	0	0	0	0	0	0	0	0	0	0	0	0	0	0	0	0	0	0	0	0	0	0	0	0	0
Hlx	1000	11.6442	15.8361	13.973	15.8361	10.2469	9.31532	13.0415	16.7676	11.6442	9.78109	14.4388	13.5072	10.2469	9.78109	5.58919	12.1099	9.78109	13.0415	13.0415	11.1784	16.3018	12.5757	14.9045	17.6991	17.6991	11.6442	13.5072	9.78109	11.6442	8.84956
Marc1	1000	5.60224	13.5387	102.241	1.86741	7.0028	2.80112	4.20168	2.33427	112.512	23.3427	7.93651	20.0747	93.3707	9.80392	71.4286	2.80112	17.2736	50.887	7.46965	16.3399	4.66853	10.7376	8.40336	18.6741	20.5415	14.4725	14.4725	7.46965	18.6741	5.60224
Marc2	1000	700.478	713.755	907.063	765.799	703.133	767.924	1021.77	911.312	857.674	729.687	702.602	674.456	852.363	704.195	645.778	920.34	862.454	1236.33	921.402	1018.59	802.443	986.723	1133.83	1271.91	1154.54	985.661	823.686	858.205	844.928	979.819
Mir1981	1000	0	0	0	0	0	0	0	0	0	0	0	0	0	0	0	0	0	0	0	0	0	0	0	0	0	0	0	0	0	0
C130074G19Rik	1000	147.564	193.13	217.666	180.161	176.306	179.46	1327.73	1133.54	204.346	155.976	155.626	168.244	199.79	184.017	124.08	171.048	150.719	193.481	460.568	205.748	558.36	193.13	219.418	467.227	634.069	326.674	318.612	167.192	211.356	880.827
Mark1	1000	771.522	717.196	836.583	825.63	734.94	743.702	1203.72	1104.93	736.692	713.472	650.383	658.927	780.066	693.538	614.239	1435.71	1339.32	1494.85	1309.31	1382.04	1103.18	1424.97	1457.17	1480.61	1578.09	1198.47	1460.24	1272.51	1408.76	1387.51
Rab3gap2	1000	766.314	731.11	775.043	796.938	749.857	667.43	752.576	715.369	684.03	648.54	662.135	682.026	836.148	764.883	678.878	823.412	808.529	896.823	826.846	804.379	695.621	980.681	883.228	873.354	972.238	700.773	779.479	736.548	780.91	796.651
Snora36b	1000	0	0	0	0	0	0	0	0	0	0	0	0	0	0	0	0	0	0	0	0	0	0	0	0	8.84956	0	0	0	0	0
Mir664	1000	0	0	0	0	0	0	0	0	0	0	0	0	0	0	0	14.4928	0	0	14.4928	0	0	0	0	0	0	0	0	0	0	0
Iars2	1000	803.107	869.492	918.644	884.463	782.486	769.209	784.463	707.062	786.441	711.299	796.61	733.616	924.011	859.322	769.492	761.582	722.881	938.701	746.61	768.927	695.198	922.034	873.446	911.582	978.814	774.011	696.328	687.288	754.237	790.113
Mir194-1	1000	0	0	0	0	0	0	0	0	0	0	0	0	0	0	0	0	0	0	0	0	0	0	0	0	0	0	0	0	0	0
Mir215	1000	0	0	0	0	0	0	0	0	0	0	0	0	0	0	0	0	0	0	0	0	0	0	0	0	0	0	0	0	0	0
Bpnt1	1000	1276.81	1399.63	1405.59	1450.5	1311.18	1292.39	1172.32	1045.83	1200.27	1171.4	1200.73	1255.27	1425.76	1434.92	1185.15	1480.29	1340.51	1790.1	1378.55	1491.75	1348.76	1618.7	1582.03	1705.77	1690.65	1384.51	1210.36	1253.9	1344.18	1369.84
Eprs	1000	1012.99	925.567	1074.43	1113.61	950.103	849.897	816.907	799.381	940.825	842.887	900.206	905.773	1115.67	1032.16	898.144	1242.89	1122.68	1318.35	1169.69	1215.26	949.897	1365.15	1274.85	1206.39	1367.84	992.577	1091.96	1120.62	1181.65	1115.26
9630028B13Rik	1000	8.51439	8.51439	4.99119	5.87199	2.936	4.99119	6.75279	4.69759	6.16559	2.0552	3.81679	4.40399	6.16559	2.3488	4.69759	2.0552	0.880799	2.936	2.936	3.22959	1.7616	3.52319	3.22959	2.3488	3.22959	4.69759	4.11039	2.6424	2.3488	2.3488
Gm2061	1000	68.8156	57.95	72.0753	82.5788	84.7519	68.0913	42.376	67.3669	58.6744	69.1778	74.9728	59.0366	97.0663	80.0435	65.556	141.978	124.955	148.135	104.672	153.568	92.3578	147.41	139.442	139.08	128.939	113.365	126.041	152.481	138.718	96.3419
Slc30a10	1000	189.032	166.067	174.807	219.195	169.323	153.728	181.148	185.775	168.809	161.782	165.724	172.751	207.712	188.689	170.865	372.751	365.21	404.97	319.966	381.662	277.292	371.38	343.102	343.787	348.415	283.119	350.643	373.265	360.24	265.981
5033404E19Rik	1000	21.1566	19.7461	29.6192	28.2087	26.7983	19.7461	40.9027	16.9252	32.4401	21.1566	29.6192	21.1566	14.1044	25.3879	18.3357	26.7983	18.3357	23.9774	33.8505	23.9774	26.7983	29.6192	33.8505	49.3653	45.134	18.3357	25.3879	29.6192	28.2087	29.6192
Mir297c	1000	0	0	0	0	0	0	0	0	0	0	0	0	0	0	0	0	0	0	0	0	0	0	0	0	0	0	0	0	0	0
Lyplal1	1000	121.116	140.14	157.895	131.262	136.969	123.653	100.824	116.043	154.724	150.285	112.238	126.823	147.115	152.822	115.409	91.3126	92.5808	158.529	98.922	105.897	96.3855	134.432	115.409	155.358	149.017	110.97	103.361	100.824	114.775	93.8491
A730004F24Rik	1000	0	0	0	0	0	0	0	0	0	0	0	0	0	0	0	0	0	0	0	0	0	0	0	0	0	0	0	0	0	0
Tgfb2	1000	737.566	505.185	616.296	546.243	575.026	649.947	113.651	116.825	564.021	419.259	530.159	631.746	692.063	527.196	482.116	94.3915	95.6614	415.661	108.148	114.921	108.36	108.995	296.296	297.143	123.598	309.841	109.841	101.587	95.4497	93.1217
Rrp15	1000	309.406	350.66	377.063	328.383	301.98	287.954	315.182	276.403	297.855	286.304	298.68	344.059	318.482	323.432	316.832	272.277	289.604	349.835	279.703	282.178	233.498	283.828	280.528	307.756	354.785	268.977	277.228	255.776	319.307	276.403
D1Pas1	1000	0	0	0	0.622665	0	0	1.55666	0.311333	0	0	0	0	0	0	0	0	0.311333	0	0.311333	0	0.933998	0	0	0	0	0	0	0	0	0.311333
Spata17	1000	15.8055	16.4134	15.8055	15.1976	16.4134	20.0608	12.1581	6.07903	10.3343	21.2766	7.90274	20.6687	13.3739	20.6687	12.766	18.2371	42.5532	50.4559	32.2188	34.6505	17.6292	27.9635	31.6109	61.3982	32.8267	39.5137	27.3556	24.924	34.6505	23.7082
1700007P06Rik	1000	10.9356	14.5808	19.4411	12.1507	21.8712	13.3657	40.0972	13.3657	9.72053	23.0863	13.3657	21.8712	26.7315	21.8712	13.3657	1.21507	0	2.43013	21.8712	0	25.5164	3.6452	0	15.7959	49.8177	3.6452	15.7959	0	0	26.7315
Gpatch2	1000	214.333	234.997	231.479	235.217	213.673	206.639	195.208	175.423	174.984	197.406	203.122	216.311	229.501	242.911	214.113	237.635	205.54	241.152	217.85	212.354	202.462	260.057	230.38	252.143	275.445	210.376	198.725	212.135	229.061	204.66
Esrrg	1000	136.738	174.91	159.14	156.272	153.226	139.606	225.448	202.33	137.993	150.538	144.982	132.796	144.265	168.638	129.928	431.362	177.24	250.538	287.993	289.068	363.62	602.33	344.086	287.814	384.05	385.125	174.731	198.387	316.129	306.272
9330162B11Rik	1000	0	0	0.45208	0	0	0	0	0	0	0.45208	0	0	0	0	0	0.904159	0	0	0.45208	0	0.45208	0	0.904159	0	0.45208	0	0	0	0.45208	0.45208
Ush2a	1000	0.440556	0.18881	0.18881	0.37762	0.251746	0.440556	0.503493	0.56643	0.37762	0.18881	0.314683	0.56643	0.56643	0.251746	0.251746	0	0.0629366	0.125873	0.18881	0.0629366	0.440556	0.125873	0.440556	0.440556	0.37762	0.440556	0.125873	0.0629366	0.18881	0.56643
Kctd3	1000	1051.31	1086.96	1120.71	1119.9	1017.55	945.72	1005.94	845.261	937.618	971.105	1030.79	1125.03	1221.17	1260.06	1031.06	955.171	848.231	970.834	973.805	934.648	876.857	989.468	863.354	1060.49	1222.79	1023.22	1025.38	1009.99	1120.98	1160.41
Kcnk2	1000	568.761	539.171	703.856	625.758	557.604	515.159	422.265	490.177	499.636	451.128	489.935	412.806	641.766	510.551	558.331	1476.59	1207.62	1361.63	1268.25	1338.59	1059.91	1239.39	1643.71	1265.83	1164.69	1600.05	1625.27	1585.01	1668.45	1370.6
Cenpf	1000	5.03507	4.58551	3.95612	6.47366	3.68639	3.32674	2.2478	3.95612	3.23683	5.75436	4.22586	5.12498	4.67542	5.12498	2.96709	7.73242	17.6227	13.217	11.3289	15.7346	5.03507	16.6337	9.71048	16.5438	19.6008	4.31577	14.4758	13.307	16.4539	7.01313
Ptpn14	1000	86.2807	61.7089	64.8734	75.0186	66.1765	96.7982	43.8384	42.3492	57.7997	69.248	43.9315	60.4989	67.8518	59.9404	42.4423	21.9657	31.0871	89.3522	20.0112	27.9226	18.2427	28.8533	49.4229	64.8734	36.8578	72.0402	33.6932	23.0827	29.8771	25.968
Smyd2	1000	1637.38	1505.3	1833.64	1733.33	1545.17	1469.78	1426.17	1137.07	1352.02	1496.57	1519.63	1451.71	1687.85	1399.38	1439.88	606.854	478.505	615.576	710.28	584.424	828.66	821.807	593.769	717.757	899.065	522.118	525.234	398.754	451.713	846.106
Prox1	1000	1141.41	581.097	1146.72	1079.04	705.825	773.024	123.278	100.073	831.037	473.773	747.16	1050.76	1215.37	752.478	691.806	238.82	222.142	237.128	213.923	245.105	213.681	411.409	229.393	194.827	312.304	191.685	162.678	240.512	261.059	157.36
Rps6kc1	1000	494.869	509.136	524.656	521.902	489.862	456.821	608.761	543.179	483.855	466.583	447.559	479.099	529.912	520.651	418.523	587.735	548.436	593.742	557.697	567.96	523.154	653.317	588.736	648.811	632.541	477.096	578.974	500.626	541.677	590.238
Angel2	1000	873.096	903.852	962.377	925.052	829.8	795.163	769.483	726.187	793.968	729.77	870.708	829.8	1005.67	928.635	795.461	1160.05	1068.38	1254.7	1050.76	1121.53	916.692	1196.48	1209.91	1114.36	1218.27	1083.31	1159.75	1223.35	1245.15	1126.01
Vash2	1000	14.3198	27.9236	18.6158	41.2888	21.957	20.2864	31.2649	28.6396	15.7518	22.9117	22.4344	18.8544	23.1504	27.4463	23.389	26.253	23.8663	19.3317	25.2983	26.253	32.4582	79.9523	25.2983	33.1742	38.6635	23.8663	26.253	26.4916	34.1289	28.1623
Mfsd7b	1000	220.455	204.551	234.646	234.646	199.657	216.051	206.998	175.434	202.104	204.062	231.221	232.2	241.253	239.295	211.157	184.732	184.487	236.115	142.403	199.168	169.807	219.476	182.53	220.455	234.891	172.253	171.03	164.179	165.647	176.658
A230020J21Rik	1000	0	0.606428	0	0	0.606428	0.606428	0	0.606428	1.81928	0	0	0	0	0	0	0	0.606428	0.606428	0	0.606428	0.606428	1.21286	0	4.85143	3.03214	0.606428	0	0	2.42571	0
Spata45	1000	0	0	0	0	0	0	0	2.33645	0	4.6729	4.6729	0	0	0	0	0	0	0	0	0	0	2.33645	0	0	0	0	0	0	0	4.6729
Tatdn3	1000	739.234	744.019	850.877	846.093	702.552	680.223	542.265	474.482	709.729	731.26	729.665	742.424	905.104	766.348	745.614	593.301	586.124	653.11	490.431	614.833	515.949	572.568	521.531	636.364	807.018	532.695	576.555	591.707	597.289	524.721
Nsl1	1000	15.4726	19.8453	20.1816	19.5089	8.74538	20.1816	9.08174	13.7908	9.75446	15.8089	14.1271	11.7726	18.4998	12.7817	14.4635	19.1726	28.5906	22.1998	21.5271	28.2543	20.1816	25.227	23.2089	22.5362	25.5634	15.1362	23.2089	17.1544	24.5543	21.5271
Batf3	1000	14.0449	25.2809	22.4719	19.6629	15.4494	26.6854	51.9663	23.8764	28.0899	42.1348	61.7978	61.7978	75.8427	67.4157	71.6292	9.83146	7.02247	32.3034	43.5393	12.6404	28.0899	14.0449	22.4719	46.3483	40.7303	16.8539	28.0899	32.3034	30.8989	50.5618
Fam71a	1000	0	0	0	0	0	0	0	0	0	0	0	0	0	0	0	0	0	0	0	0	0	0	0	0	0	0	0	0	0	0
Atf3	1000	16.1943	18.2186	17.2065	12.6518	10.6275	8.09717	5.5668	5.5668	17.7126	12.6518	19.7368	26.3158	29.3522	22.2672	26.8219	39.4737	70.8502	36.9433	21.7611	45.5466	28.3401	26.8219	21.2551	23.7854	29.3522	17.7126	22.2672	12.1457	20.749	19.2308
Nenf	1000	1813.07	2328.27	2519.76	2458.97	2138.3	2348.02	2875.38	2411.85	2237.08	2331.31	2521.28	1886.02	2565.35	2378.42	2000	2375.38	2015.2	3113.98	2536.47	2343.47	2238.6	2715.81	2583.59	3165.65	3003.04	2452.89	2127.66	2132.22	2167.17	2639.82
Tmem206	1000	104.186	116.556	116.318	114.177	98.2398	88.0114	99.9049	96.3368	101.332	94.196	114.177	100.143	121.075	117.507	107.755	120.599	121.075	138.202	106.803	123.692	97.2883	137.012	118.459	137.488	140.818	104.186	113.701	106.327	103.949	118.696
Ppp2r5a	1000	1044.78	1321.22	1323.82	1223.23	1131.73	1075.6	1476.96	1200.84	1109.02	1137.9	1257.62	1184.3	1345.88	1315.06	1181.38	1528.55	1367.29	1623.95	1511.68	1501.3	1366.97	1602.53	1500.97	1564.57	1774.5	1463.01	1605.13	1618.43	1644.06	1662.88
Dtl	1000	17.3995	29.6261	22.5723	20.9264	20.221	21.3967	100.165	125.088	29.391	22.8074	28.6856	14.3428	17.8697	22.8074	18.8103	18.8103	34.5638	29.391	48.4364	30.0964	55.02	27.9802	23.7479	48.4364	75.0059	16.6941	43.7338	19.9859	21.3967	66.071
Ints7	1000	266.966	285.287	291.83	275.752	257.992	252.758	389.419	348.289	247.149	266.405	279.865	285.1	301.365	296.13	254.627	406.057	355.954	413.535	372.032	375.023	346.607	393.532	377.454	413.535	523.088	424.191	478.594	451.486	458.03	480.464
Lpgat1	1000	1276.77	1499.72	1354.3	1472.54	1371.83	1197.99	1890.59	1746.69	1331.13	1327.95	1209.3	1293.05	1410.73	1577.68	1182.67	1713.3	1398.18	1678.95	1776.08	1577.26	1813.6	1909.35	1584.85	1892.8	2423.7	1739.24	1687.22	1383.55	1536.29	2347.54
Nek2	1000	16.578	14.3885	19.706	12.8245	17.8292	16.2652	11.8861	18.142	10.635	16.8908	10.9478	10.3222	10.9478	10.635	13.7629	50.0469	68.8145	53.1749	35.0328	59.1179	35.3456	48.483	45.6678	49.1085	50.0469	32.5305	62.8714	81.3262	77.2599	60.6819
1700034H15Rik	1000	31.1784	30.7199	34.3879	34.8464	30.9491	33.0124	42.4117	37.5974	30.9491	38.2852	34.1586	29.5736	40.807	27.2811	27.5103	30.4906	30.7199	30.4906	30.9491	29.1151	24.0715	24.0715	26.3641	37.8267	41.0362	35.3049	32.7831	39.89	41.0362	35.5342
Slc30a1	1000	375.526	343.977	407.839	384.512	356.405	352.581	309.369	280.497	381.262	333.652	296.176	304.207	383.556	373.805	278.394	536.52	423.136	546.654	405.354	501.53	344.742	488.145	475.717	493.69	549.904	433.461	458.891	488.719	513.576	458.891
Rd3	1000	8.90555	4.45278	4.68713	3.98406	6.32763	21.5608	2.57792	2.10921	3.74971	5.62456	2.57792	13.124	3.98406	6.56199	5.15585	9.37427	25.5449	61.1671	12.8896	16.1706	9.84298	16.8737	40.5437	63.2763	18.5142	44.5278	21.7952	21.0921	25.5449	6.56199
Traf5	1000	22.2749	22.2749	26.0664	26.0664	17.5355	35.545	56.3981	40.7583	32.7014	22.7488	33.6493	27.9621	30.8057	34.1232	20.8531	38.3886	36.019	45.9716	47.3934	38.3886	57.8199	41.2322	21.327	55.9242	66.3507	44.5498	42.654	48.3412	55.9242	78.1991
Mir3473c	1000	24.6914	24.6914	0	24.6914	12.3457	0	0	24.6914	0	24.6914	0	0	0	0	12.3457	0	0	0	0	0	24.6914	12.3457	0	12.3457	0	0	0	0	0	0
Rcor3	1000	352.568	362.299	357.773	370.898	336.275	295.316	250.735	214.076	283.322	278.344	339.217	353.021	428.151	380.855	335.596	265.445	256.619	292.826	222.222	266.35	256.393	283.322	262.503	263.408	305.046	220.638	222.222	229.69	243.947	237.158
Gm10516	1000	120.98	122.129	131.7	117.917	102.603	117.152	108.729	80.0153	95.7121	96.0949	114.472	120.214	146.248	116.386	115.62	89.5865	79.6325	115.62	82.3124	88.438	89.5865	102.986	108.729	97.2435	96.4778	76.1868	81.5467	87.6723	77.7182	112.557
Kcnh1	1000	514.021	366.902	504.904	458.489	394.806	444.537	599.668	533.914	419.948	323.94	355.85	409.173	489.432	381.544	338.721	585.164	576.185	747.065	577.152	564.719	533.499	550.767	633.927	771.654	697.61	592.485	642.768	490.123	568.034	704.103
Hhat	1000	12.3457	17.284	13.4039	20.4586	13.7566	10.9347	10.9347	8.46561	10.2293	8.46561	11.9929	9.52381	15.1675	8.46561	17.6367	13.4039	8.46561	23.9859	17.9894	12.6984	13.7566	16.2257	17.284	16.5785	14.1093	18.3422	7.76014	11.6402	10.2293	11.9929
1700065J18Rik	1000	7.42574	14.8515	4.9505	9.90099	4.9505	0	9.90099	7.42574	4.9505	2.47525	2.47525	2.47525	4.9505	4.9505	7.42574	4.9505	4.9505	0	2.47525	7.42574	2.47525	7.42574	9.90099	0	4.9505	22.2772	0	2.47525	0	4.9505
Sertad4	1000	377.242	342.84	475.154	456.042	367.245	363.423	186.122	173.772	311.379	247.574	338.43	334.313	524.258	362.834	417.524	918.259	790.356	847.398	726.551	888.562	552.485	878.859	967.069	811.526	690.679	638.93	722.729	836.225	791.532	570.126
Gm15867	1000	50.4032	49.3952	54.4355	53.4274	39.3145	37.2984	34.2742	34.2742	25.2016	30.2419	51.4113	34.2742	47.379	57.4597	48.3871	92.7419	80.6452	100.806	81.6532	94.7581	67.5403	105.847	85.6855	97.7823	80.6452	63.5081	54.4355	66.5323	59.4758	63.5081
Syt14	1000	231.041	206.349	269.211	259.007	212.396	201.31	123.205	117.536	201.814	180.776	202.948	187.075	301.587	220.081	226.002	240.111	229.403	264.928	189.468	251.827	173.091	239.355	230.789	224.742	235.45	206.349	228.143	218.947	234.316	187.957
Diexf	1000	189.438	168.89	200.252	202.596	178.082	166.186	137.707	120.764	167.267	148.882	186.373	188.176	241.168	208.363	195.566	166.907	164.744	174.838	150.144	170.872	152.307	179.704	160.959	173.396	194.665	145.458	175.919	176.82	192.322	168.709
Irf6	1000	6.06208	7.75946	13.579	10.6693	5.57711	10.4268	12.6091	11.8817	14.549	11.1542	5.33463	4.12221	13.579	9.45684	9.9418	11.1542	13.0941	33.2202	6.54704	9.69932	9.21435	10.9117	15.0339	18.9137	16.7313	20.3686	17.2163	11.3967	12.8516	16.2464
A130010J15Rik	1000	94.1575	82.9421	99.8957	93.1142	88.4194	75.1174	62.337	62.8586	82.9421	72.5091	73.2916	78.5081	84.7679	81.1163	75.3782	93.8967	90.7668	98.5915	79.8122	108.242	67.0318	97.8091	94.6792	100.156	99.6348	75.1174	79.2906	85.2895	89.9844	83.2029
Traf3ip3	1000	15.5587	33.9463	25.9312	14.1443	25.4597	19.3305	19.802	22.1594	24.0453	19.3305	14.6157	16.0302	13.6728	25.4597	13.6728	18.859	14.1443	21.2164	20.2735	23.5738	20.7449	16.5017	22.1594	14.1443	21.2164	17.4446	21.2164	18.3876	18.3876	18.3876
Hsd11b1	1000	997.924	914.187	1341.87	1001.38	869.896	866.436	498.27	265.744	1166.09	746.713	1103.81	965.398	1569.55	1018.69	1307.96	152.941	78.2007	206.92	244.983	137.716	316.955	391.696	186.851	172.318	296.886	211.765	152.249	166.782	208.997	278.201
G0s2	1000	208.778	264.531	336.892	259.786	190.985	214.709	224.199	117.438	268.09	238.434	244.365	245.552	436.536	224.199	262.159	160.142	154.211	192.171	182.681	156.584	196.916	212.337	168.446	204.033	245.552	199.288	193.357	175.563	181.495	246.738
Lamb3	1000	16.0903	17.5312	20.4131	17.5312	22.3343	16.0903	17.0509	17.7714	17.5312	16.5706	12.9683	15.3698	18.2517	15.1297	10.8069	36.7435	32.9011	41.3064	35.7829	35.0624	24.976	35.0624	35.7829	36.0231	38.1844	21.3737	29.5389	47.3103	34.1018	35.7829
Camk1g	1000	383.612	487.566	401.549	475.336	533.225	412.148	742.764	704.851	441.908	492.458	490.828	415.002	585.406	665.715	584.183	487.974	426.009	351.406	404.403	397.065	282.511	448.023	399.511	446.392	488.382	424.378	560.13	551.57	517.326	624.134
Mir205	1000	0	0	0	0	0	0	0	0	0	0	0	0	0	0	0	0	0	0	0	0	0	0	0	0	0	0	0	0	0	0
4930503O07Rik	1000	0	1.7301	0	0	0	0	0	0	0	0	0	0	0	0	0	0	0	0	0	0	0	1.7301	0	0	0	0	0	0	0	0
Plxna2	1000	645.763	645.039	676.393	675.85	651.835	560.58	650.204	616.312	590.666	494.517	537.472	591.482	770.276	671.409	588.763	822.111	778.885	771.817	772.179	728.138	602.084	732.941	761.939	838.604	896.239	699.773	869.687	745.446	800.362	851.744
Cd34	1000	735.216	816.864	853.873	836.704	792.064	730.256	1951.93	1457.46	632.201	1008.39	849.294	705.837	1082.79	967.57	872.186	260.206	246.852	304.082	523.846	301.793	671.118	327.356	280.427	589.088	979.397	429.225	471.194	242.274	304.082	877.528
Gm16897	1000	6.02168	10.4376	12.4448	7.22601	10.4376	6.42312	11.2405	8.83179	8.83179	13.2477	4.4159	7.22601	11.2405	6.42312	7.62746	14.0506	10.4376	20.4737	12.0434	12.8462	12.0434	16.0578	12.0434	16.8607	15.2549	10.0361	8.83179	16.0578	9.63468	8.0289
A330023F24Rik	1000	784.793	879.692	897.786	902.791	702.021	742.637	902.791	717.613	672.955	900.096	1073.92	899.519	991.915	1016.17	842.348	680.077	689.894	822.329	597.498	612.127	646.583	704.909	571.511	834.456	1024.06	704.331	764.004	729.163	846.198	887.969
Mir29b-2	1000	0	0	0	0	0	0	0	0	0	0	0	0	0	0	0	0	0	0	0	0	0	0	0	0	0	0	0	0	0	0
Mir29c	1000	0	0	0	0	0	0	0	0	0	0	0	0	0	0	0	0	0	0	0	0	0	0	0	0	0	0	0	0	0	0
Cd46	1000	139.324	101.401	140.148	113.768	99.7527	110.47	103.05	108.821	134.378	91.5087	136.026	91.5087	174.773	84.089	103.875	79.1426	98.1039	84.9134	89.8599	114.592	102.226	85.7378	76.6694	94.8063	112.119	73.3718	84.089	116.241	90.6843	94.8063
Cr1l	1000	397.112	394.705	471.721	456.679	404.934	380.866	342.96	306.258	401.324	389.892	319.495	335.138	451.865	412.154	320.096	487.365	465.102	622.744	462.094	513.839	421.179	534.296	569.795	547.533	629.964	445.848	435.018	453.67	475.331	426.594
Cr2	1000	2.41663	3.70549	1.28887	4.02771	2.73884	1.77219	2.57773	4.18882	3.54439	2.09441	2.09441	3.06106	3.54439	3.06106	2.41663	2.73884	1.28887	1.12776	2.73884	1.9333	4.02771	1.28887	3.06106	4.02771	3.54439	2.73884	2.25552	1.61108	1.44998	4.34993
B020014A21Rik	1000	0	0	0	0	0	0	0	0	0	0	0	0	0	0	0	0	0	0	0	0	0	0	0	0	0	0	0	0	0	0
H60c	1000	0.354988	0.709975	0	0	0.354988	0	0	0	0	0	0	0	0.354988	0	0	0	0	0	0	0	0	0	0	0	0	0	0	0	0	0
Ppp1r14c	1000	474.643	389.857	460.777	432.647	400.951	395.8	242.076	256.339	364.105	351.823	359.746	338.748	449.287	368.859	329.239	99.0491	65.7686	99.0491	109.35	89.1442	140.254	133.122	94.2948	110.935	150.555	115.293	146.593	113.312	113.708	145.8
Iyd	1000	155.195	87.013	152.597	129.87	118.831	133.117	7.14286	10.3896	171.429	103.247	213.636	163.636	272.727	200	194.805	5.19481	7.79221	16.2338	5.84416	3.8961	5.19481	26.6234	7.79221	3.24675	9.74026	12.987	9.09091	8.44156	2.5974	6.49351
Plekhg1	1000	139.736	216.752	188.023	375.641	181.414	161.316	113.839	101.295	139.196	159.023	157.27	162.8	234.017	261.532	232.398	204.883	167.656	193.148	181.279	197.194	228.756	751.956	194.632	176.963	277.313	205.827	188.023	192.339	246.291	181.818
Mthfd1l	1000	121.884	119.114	140.582	121.422	104.571	113.804	142.198	126.962	114.497	110.572	142.428	116.574	171.976	152.585	144.737	99.723	102.262	117.729	116.574	96.7221	94.1828	128.809	119.114	113.343	141.736	89.7969	104.109	117.959	120.96	151.893
Akap12	1000	121.979	156.235	167.761	204.098	123.579	149.032	266.848	197.055	120.538	175.764	126.621	113.494	132.223	132.223	96.8465	157.195	116.856	142.148	160.717	149.352	193.213	284.617	147.111	184.248	218.185	146.951	129.182	117.336	150.632	180.407
Zbtb2	1000	177.254	195.848	229.005	182.213	184.692	185.621	145.646	114.967	163	152.464	245.739	220.948	269.91	202.355	216.92	154.323	143.787	176.635	132.941	138.519	140.068	180.973	160.211	169.197	173.536	170.437	199.876	204.834	177.564	160.83
Rmnd1	1000	2.70416	1.08167	0	0	2.16333	3.78583	1.08167	2.16333	0	0.540833	0	1.6225	1.08167	3.245	2.16333	1.6225	0	1.08167	3.245	1.08167	3.245	1.6225	0.540833	4.32666	0	1.6225	2.70416	1.6225	0.540833	2.70416
Gm5512	1000	0.856409	2.56923	1.42735	0.28547	0.570939	0.856409	2.56923	0.570939	1.14188	1.71282	2.28376	2.56923	0.570939	0.570939	0.28547	0.28547	1.99829	2.56923	0.856409	1.99829	1.42735	0.28547	0.856409	2.28376	0.856409	3.14017	1.71282	0.570939	1.14188	2.8547
Armt1	1000	453.275	452.402	484.716	505.24	440.175	405.24	340.611	296.07	401.31	381.223	407.86	465.939	480.349	495.197	427.074	528.821	492.576	565.502	515.721	527.948	465.939	535.371	532.314	553.275	545.415	463.755	522.707	451.528	501.31	520.524
Ccdc170	1000	19.9907	19.0609	9.298	5.5788	18.596	27.4291	4.649	5.1139	13.947	20.4556	6.0437	31.1483	8.8331	19.9907	12.0874	13.947	67.4105	62.2966	43.7006	39.9814	16.2715	44.1655	53.4635	105.997	60.437	43.7006	52.5337	48.8145	60.437	25.5695
Esr1	1000	12.664	15.6303	18.3685	12.0936	12.2076	11.0667	12.8922	16.6572	20.4221	12.8922	9.92584	10.8386	15.0599	13.4626	13.1204	7.07359	7.75813	7.18768	5.93269	6.84541	4.79179	8.78494	4.10724	8.44267	6.27496	4.44952	7.18768	4.33542	3.99315	7.52995
Syne1	1000	1784.39	1536.58	1990.45	1861.13	1593.45	1579.7	1316.38	1215.28	1567.56	1268.68	1853.4	1838.99	2481.31	1743.53	1868.97	1914.31	1758.38	1908.73	1591.35	1790.85	1387.5	1759.48	1729.89	1789.58	1910.39	1618.35	1917.4	1928.77	2018.55	1622.16
Myct1	1000	10.0756	8.6362	8.6362	13.3141	8.6362	10.4354	14.0338	6.11731	6.83699	7.19683	6.47715	6.11731	9.71573	9.35588	6.11731	7.55668	7.19683	11.1551	8.27636	9.71573	9.71573	5.75747	10.0756	14.0338	11.1551	14.3937	8.99604	9.71573	10.4354	11.8748
Vip	1000	312.377	435.494	287.492	341.847	388.998	262.606	1401.44	1103.47	431.565	428.946	446.627	379.175	381.794	515.39	366.077	45.1866	24.8854	72.6916	170.269	49.1159	254.748	54.3549	30.7793	144.728	324.165	113.294	193.189	39.2927	45.8415	464.964
Fbxo5	1000	47.5927	44.8257	37.078	43.1655	38.7382	34.311	30.9906	27.6702	31.544	39.2916	38.1848	42.0587	38.1848	39.845	38.7382	52.0199	52.5733	51.4665	58.6608	63.6414	32.6508	53.6801	50.9131	54.7869	73.6027	37.6314	45.3791	58.6608	55.3403	43.7189
Mtrf1l	1000	126.669	112.552	120.565	142.312	130.103	115.223	107.211	101.87	119.039	112.934	123.617	112.171	133.537	131.248	109.882	148.798	160.244	155.284	133.918	156.047	122.091	166.73	147.272	162.152	156.047	133.155	150.706	134.681	156.81	123.998
Rgs17	1000	324.542	318.315	341.026	354.701	291.453	273.871	432.357	404.518	291.819	337.485	302.564	295.36	338.095	323.199	257.998	526.862	470.94	454.701	488.523	474.847	404.518	546.764	455.311	461.783	527.35	395.238	511.111	413.553	438.95	528.694
Oprm1	1000	8.04348	6.30435	7.82609	8.69565	7.17391	8.47826	8.47826	8.91304	9.13043	4.78261	3.47826	7.17391	5.21739	9.56522	3.69565	51.087	60.4348	55.2174	34.7826	43.6957	24.1304	48.0435	40.8696	40	34.5652	28.4783	48.913	25.8696	40.4348	34.5652
Ipcef1	1000	290.291	227.063	291.99	315.17	230.461	195.752	531.432	515.655	241.141	185.68	226.82	223.665	276.092	206.068	178.883	63.5922	71.1165	84.7087	346.723	77.3058	365.777	76.0922	60.801	270.51	452.427	167.718	182.403	38.9563	49.8786	490.777
Cnksr3	1000	47.2738	58.5847	58.2947	76.2761	51.6241	66.7053	58.2947	62.065	60.0348	67.8654	57.4246	66.1253	58.5847	66.9954	41.4733	78.8863	78.8863	151.392	76.5661	77.4362	74.2459	153.712	98.3179	125.29	118.91	108.469	73.0858	65.5452	76.5661	74.826
Ulbp1	1000	1.09951	2.19901	0	0.549753	1.09951	1.09951	0.549753	1.64926	0	2.19901	1.09951	0	1.64926	0.549753	1.09951	1.09951	1.09951	2.19901	1.09951	0.549753	1.09951	1.64926	1.09951	4.94777	0.549753	2.19901	0.549753	1.64926	1.64926	1.64926
Lrp11	1000	3547.54	3130.7	3660.58	3652.63	3175.15	3033.85	2453.64	2363.56	3214.01	2814.25	2891.37	2980.87	3781.87	3268.77	2996.76	2663.82	2256.99	2533.41	2561.97	2420.96	2326.17	2938.18	2576.39	2593.46	2873.12	2129.82	2282.6	2027.67	2232.56	2742.71
Pcmt1	1000	2766.82	2691.18	2841.42	2939.49	2668.75	2488.78	3291.08	3038.08	2625.46	2624.41	2744.39	2700.05	3220.14	3092.33	2635.37	2805.95	2347.94	2815.86	2821.07	2721.44	2564.42	3196.14	2629.63	2923.84	3346.9	2543.04	2744.91	2570.16	2715.18	3284.3
A630066F11Rik	1000	23.9425	28.731	51.0774	45.4908	37.51	39.9042	40.7023	22.3464	31.1253	42.2985	42.2985	33.5196	32.7215	35.1157	35.9138	57.4621	47.8851	59.8563	28.731	83.0008	23.9425	48.6832	47.087	66.241	38.3081	34.3176	28.731	45.4908	46.2889	42.2985
Nup43	1000	100	134.109	112.403	97.6744	100.775	88.3721	119.38	82.1705	109.302	100	106.977	107.752	135.659	138.76	117.829	113.178	103.101	135.659	92.2481	119.38	87.5969	141.085	124.031	131.783	151.938	101.55	116.279	110.078	129.457	119.38
BC020402	1000	95.521	73.5832	101.005	104.662	91.8647	91.8647	90.4936	83.181	84.5521	73.5832	80.4388	79.0676	111.06	115.174	84.5521	113.803	85.0091	118.373	94.6069	111.974	85.4662	115.631	109.689	112.431	119.744	99.6344	111.974	106.033	119.287	113.346
Lats1	1000	362.162	337.491	380.735	381.012	340.402	317.394	282.883	258.351	306.861	300.347	304.366	344.837	386.694	355.094	300.624	392.238	391.961	458.628	345.392	399.307	294.248	425.78	408.039	408.039	434.789	340.541	355.509	374.082	403.604	321.83
Katna1	1000	276.62	295.211	317.183	316.62	281.127	278.873	276.056	228.732	257.465	268.169	323.944	299.718	347.042	296.338	271.549	330.141	302.535	438.31	301.972	338.592	272.113	343.662	365.634	388.169	450.704	353.239	399.437	383.662	363.944	347.042
Ginm1	1000	407.193	416.185	481.053	487.476	425.177	443.16	444.444	363.52	411.047	425.819	439.949	387.283	461.785	418.112	362.235	437.38	380.861	684.008	404.624	475.273	346.821	495.825	531.792	592.164	574.823	518.947	371.227	423.892	456.647	390.495
Ppil4	1000	879.144	806.975	865.331	940.262	780.732	710.981	661.257	673.343	743.094	684.738	865.677	846.34	977.901	855.663	787.293	924.724	846.34	985.843	828.729	882.942	713.743	939.572	916.782	943.37	1053.52	777.624	950.276	928.867	920.58	878.798
Zc3h12d	1000	0.977278	0.488639	3.66479	0.24432	0.732959	1.71024	1.2216	0.732959	0.24432	0.732959	0	0.977278	0.24432	0.24432	0.488639	1.2216	0.732959	2.19888	1.46592	3.17615	1.95456	2.4432	2.68752	2.68752	1.2216	1.2216	0.732959	0.732959	0.488639	1.2216
Mir5104	1000	0	0	0	0	0	0	0	0	0	0	0	0	0	0	0	0	0	0	0	0	0	0	0	0	0	0	0	0	0	0
Tab2	1000	975.456	1036.23	1075.97	1018.93	957.691	875.409	775.596	728.144	876.812	812.763	864.189	930.575	1053.3	1027.82	881.954	1182.8	1093.74	1300.61	1020.1	1209.68	932.445	1264.61	1237.73	1183.73	1313.93	1104.96	1151.94	1277.93	1211.08	1086.72
Ust	1000	956.349	879.785	977.358	952.848	903.128	819.328	217.554	181.839	800.654	735.761	805.789	828.431	990.43	938.375	838.235	585.901	612.512	620.682	500	631.186	389.823	616.48	584.5	555.322	574.697	407.096	492.53	516.106	506.069	405.229
Sash1	1000	765.836	845.886	869.135	887.512	780.732	769.873	588.334	479.883	689.545	685.786	668.384	710.149	967.145	899.903	772.24	862.035	718.641	815.954	700.543	820.688	719.477	1034.11	826.953	749.826	902.408	757.483	739.385	824.586	877.906	726.716
Samd5	1000	141.884	197.996	212.425	252.906	189.579	147.094	127.054	104.208	160.721	166.333	146.693	143.086	205.611	207.615	161.924	233.667	191.583	228.858	191.984	240.481	165.13	303.006	222.846	191.583	209.619	241.683	226.453	240.08	243.287	214.83
Gm6150	1000	1.00671	0.671141	0.33557	2.01342	2.68456	1.34228	1.00671	3.69128	0.671141	1.67785	0.671141	1.34228	3.69128	1.34228	2.34899	3.3557	2.68456	4.69799	2.34899	2.68456	1.67785	2.01342	5.36913	3.02013	6.71141	3.02013	5.03356	4.69799	5.03356	1.67785
Stxbp5	1000	922.305	790.831	1009.04	938.395	841.084	752.039	646.573	642.495	783.337	649.438	759.643	806.811	1038.79	864.338	779.59	567.776	575.711	596.87	600.948	569.65	527.11	609.213	551.686	648.005	718.426	480.824	541.106	458.894	480.273	632.466
Adgb	1000	22.8057	19.931	14.1817	12.4569	18.7811	15.1399	11.8819	10.1571	18.5895	17.6313	9.39057	36.0291	13.2235	17.8229	11.4987	12.0736	56.1518	21.8475	24.9138	35.0709	15.3315	40.0537	25.1054	47.7194	40.8202	15.9065	38.3289	36.0291	38.9038	22.8057
Rab32	1000	70.1071	62.8043	113.437	72.5414	54.0409	77.4099	40.409	48.6855	81.7916	50.6329	71.0808	62.8043	87.6339	62.8043	66.6991	55.5015	44.3038	57.9357	55.9883	58.9094	47.7118	63.2911	51.6066	58.9094	85.6865	45.7644	51.1198	44.3038	51.1198	36.5141
Gm5177	1000	0.792602	0	0.264201	0.528402	0.528402	0.792602	0.264201	0.264201	0	0	0	0.264201	0.528402	0.792602	0	0	0	0	0	0.264201	0	0	0	0	0.264201	0	0.264201	0	0	0
Grm1	1000	671.245	527.182	678.827	757.797	580.258	597.425	334.621	296.71	527.468	421.03	542.346	612.732	772.246	568.526	516.595	620.029	506.438	554.363	487.554	536.338	433.906	849.785	534.192	497.425	511.302	597.997	666.524	669.957	657.225	573.534
4930567K20Rik	1000	0	0	0	0	0	0	0	0	0	0	0	0	0	0	0	0	0	0	0	0	0	0	0	0	0	0	0	0	0	0
Shprh	1000	314.889	253.956	329.207	324.577	254.71	252.987	222.521	197.115	282.592	229.949	266.982	265.368	350.953	282.808	238.777	317.257	320.81	361.826	292.497	323.609	246.851	350.737	312.735	327.699	381.311	262.246	305.092	310.152	321.563	294.219
Fbxo30	1000	72.7415	85.0606	75.2835	76.2612	65.1154	71.5682	68.244	61.4001	69.6128	64.9198	67.2663	69.8084	71.3727	79.5855	50.2542	125.147	124.169	144.896	94.8377	124.756	103.637	134.533	107.743	144.505	137.27	121.822	112.436	105.592	116.543	111.654
Epm2a	1000	501.39	505.097	496.756	556.07	446.71	448.563	470.806	481.928	473.587	417.98	379.981	458.758	487.488	482.854	409.639	568.119	532.901	625.579	531.974	552.363	431.881	641.335	540.315	589.435	671.918	379.055	462.465	415.199	469.88	469.88
Utrn	1000	163.14	204.248	173.962	194.557	169.359	170.812	293.087	237.441	155.71	160.959	131.966	142.869	165.724	177.677	114.44	589.889	521.402	664.109	489.662	576.644	464.626	535.051	611.291	581.893	613.794	577.047	536.343	491.116	551.93	495.72
B230208H11Rik	1000	6.76819	6.76819	5.92217	10.1523	5.07614	5.92217	8.46024	6.76819	4.23012	7.61421	5.92217	9.30626	5.92217	10.1523	6.76819	13.5364	19.4585	15.2284	6.76819	18.6125	10.9983	9.30626	14.3824	13.5364	5.92217	11.8443	8.46024	5.92217	16.0745	5.92217
Stx11	1000	2.92154	5.00835	4.17362	9.18197	2.50417	6.26043	2.50417	7.51252	2.50417	2.92154	0.834725	4.59098	2.50417	5.00835	4.17362	4.17362	2.08681	11.6861	5.42571	4.59098	3.3389	4.17362	7.09516	8.34725	2.08681	6.26043	2.92154	1.66945	2.08681	3.3389
Sf3b5	1000	1302.45	1538.15	1709.81	1546.32	1508.17	1376.02	1491.83	1126.7	1452.32	1411.44	1523.16	1471.39	1814.71	1690.74	1440.05	1621.25	1623.98	1907.36	1711.17	1626.7	1378.75	2039.51	1731.61	1881.47	1821.53	1497.28	1467.3	1532.7	1697.55	1762.94
Plagl1	1000	182.665	173.541	130.964	146.55	164.227	222.011	224.672	221.251	175.822	187.227	117.658	145.98	101.692	145.22	101.882	241.399	283.786	365.71	262.308	290.249	216.879	318.571	313.248	315.719	328.265	263.638	281.695	288.728	286.828	257.175
Hymai	1000	0	0	0.791139	0.593354	0	0.791139	0.593354	1.18671	0.39557	0.39557	0.197785	0	0.593354	0	0	0.39557	1.58228	0.791139	0.791139	1.18671	1.78006	0.593354	0.197785	1.97785	1.78006	0.988924	0.593354	1.18671	0.988924	1.18671
Zc2hc1b	1000	1.89934	0.949668	0	0	0	0.949668	0	0	0	0	0	0	0	0	0	0	0	0.949668	0	0	0.949668	1.89934	0.949668	0	0	0	0	0	0	0
Ltv1	1000	440.611	430.995	467.195	450.792	430.995	402.149	332.579	308.824	404.977	398.756	372.172	416.29	455.882	427.602	386.878	475.679	454.751	514.706	450.792	454.751	457.014	518.665	547.511	518.1	551.471	380.656	391.968	372.738	446.267	425.905
Phactr2	1000	186.918	191.518	173.006	191.406	173.342	257.265	146.415	147.874	169.415	178.84	119.825	162.235	140.357	153.147	104.454	120.049	103.332	352.968	117.693	119.152	129.698	184.674	231.235	287.67	165.489	307.865	109.503	110.176	132.391	122.966
Fuca2	1000	365.959	371.775	371.27	413.505	327.011	370.511	367.729	311.33	338.139	353.566	341.173	343.197	394.031	366.717	319.423	442.337	354.072	581.184	400.354	439.555	357.36	490.895	518.209	568.791	503.288	494.436	364.441	353.06	365.959	408.447
Pex3	1000	584.2	548.857	641.164	645.738	558.42	534.304	478.586	454.886	570.478	487.734	561.746	527.235	676.091	569.647	548.025	584.615	544.699	651.559	551.351	614.137	492.308	598.337	630.353	604.99	674.844	513.098	493.139	543.867	542.62	573.805
Adat2	1000	189.264	148.658	196.146	165.864	166.552	135.582	119.064	143.84	135.582	150.034	147.281	139.711	171.37	156.917	152.787	190.64	183.07	176.187	165.864	212.663	125.258	209.222	187.887	174.811	173.434	145.905	150.034	136.958	144.529	147.97
Aig1	1000	884.25	959.203	960.152	936.433	906.072	823.529	1003.8	821.632	906.072	887.097	844.402	810.247	909.867	959.203	740.987	1163.19	983.871	1315.94	1274.19	1233.4	1124.29	1313.09	1182.16	1289.37	1398.48	999.051	1008.54	973.435	1080.65	1179.32
Hivep2	1000	1681.82	1641.18	1719.29	1870.5	1714.89	1470.31	1714.78	1476.66	1434.17	1414.31	1711.81	1580.16	2155.61	1884.62	1822.17	1297.71	1205.26	1238.23	1408.17	1205.57	1223.38	1276.92	1352.78	1382.88	1603.3	1298.73	1406.02	1214.27	1299.14	1548.53
Adgrg6	1000	12.1445	11.0684	11.837	17.6787	9.53113	10.2998	34.8962	38.1245	11.5296	11.6833	8.91622	9.68486	11.5296	14.7579	7.37894	21.3682	23.6741	23.5204	25.2114	25.2114	27.5173	18.6011	20.5995	26.5949	51.96	25.5188	29.5158	24.9039	32.4366	37.3559
Vta1	1000	1098.87	1268.68	1292.08	1260.38	1220.38	1061.89	1132.83	1073.21	1102.64	1103.4	1239.25	1135.85	1335.85	1356.98	1197.74	1619.62	1421.89	1607.55	1461.13	1578.11	1345.66	1775.85	1633.96	1515.47	1717.74	1320	1405.28	1443.77	1303.4	1409.81
1700016L04Rik	1000	3.2967	1.0989	1.0989	3.2967	3.2967	1.0989	3.2967	0	1.0989	6.59341	2.1978	3.2967	5.49451	1.0989	0	4.3956	5.49451	1.0989	7.69231	8.79121	6.59341	4.3956	3.2967	6.59341	7.69231	0	6.59341	1.0989	0	2.1978
Gje1	1000	0	0	0	0	0	0	0	0	0	0	0	0.677048	0	0	0	0	0	0	0	0	0	0	0	0	0	0	0	0	0	0
Nmbr	1000	58.8235	59.676	54.561	69.9062	61.3811	42.6257	39.2157	35.8056	52.8559	34.9531	75.0213	42.6257	70.7587	57.971	59.676	32.3956	26.428	30.6905	39.2157	26.428	45.1833	37.5107	25.5754	32.3956	56.266	23.8704	27.2805	20.4604	17.9028	52.8559
C330004P14Rik	1000	0	0	3.18471	0	0	0	0	0	0	0	0	0	0	0	0	0	0	0	0	0	0	0	0	0	0	0	0	0	0	0
Gm20125	1000	1.76419	5.29256	3.52837	5.29256	2.35225	1.76419	0.588062	1.47016	3.52837	1.47016	4.11644	2.35225	1.47016	2.64628	1.17612	0.294031	0.882094	0	0	0.294031	0	0.882094	0	0	0	0.294031	0.882094	0	0	0.882094
Cited2	1000	867.445	708.481	809.04	816.15	727.273	721.686	598.781	600.305	705.434	624.175	550.533	592.179	667.852	561.706	503.301	1109.7	1149.31	1267.65	1089.89	1074.66	1017.27	1376.84	1175.72	1175.72	1103.61	707.974	781.107	754.698	792.788	796.343
Txlnb	1000	36.7961	30.7382	40.3859	37.6935	29.392	29.392	32.3087	30.7382	32.7575	29.1676	29.8407	30.7382	34.1037	38.591	27.597	28.4945	31.86	29.6163	32.5331	35.6742	37.0204	28.9432	31.1869	42.4052	54.0722	33.4306	42.6296	40.1615	52.9504	34.1037
Heca	1000	350.695	430.87	410.963	394.328	377.148	346.059	345.241	312.79	357.786	344.423	370.875	361.876	451.868	414.235	377.966	357.786	362.422	404.418	335.969	371.148	329.425	388.328	342.514	403.872	459.504	331.879	384.238	351.241	358.876	361.331
Abracl	1000	546.914	638.272	711.111	743.21	650.617	638.272	433.333	371.605	550.617	582.716	783.951	607.407	987.654	855.556	812.346	527.16	486.42	623.457	546.914	586.42	496.296	491.358	504.938	579.012	648.148	464.198	543.21	507.407	446.914	618.519
Reps1	1000	962.185	950.726	1062.26	959.511	950.344	836.898	723.071	694.805	877.769	833.461	993.506	897.632	1146.29	1077.54	1007.26	715.432	645.913	729.565	663.102	674.179	620.703	823.147	731.856	757.066	852.177	605.424	639.037	667.303	691.367	668.067
Ect2l	1000	9.65517	8.62069	4.48276	5.51724	11.3793	5.86207	2.75862	3.10345	6.89655	7.58621	7.93103	16.8966	11.7241	9.31034	6.89655	7.24138	18.9655	13.4483	17.2414	15.8621	6.55172	17.931	7.93103	20	12.7586	9.65517	18.2759	23.4483	24.8276	14.4828
Ccdc28a	1000	563.465	624.357	575.472	657.804	610.635	552.316	714.408	646.655	569.468	581.475	579.76	572.899	668.954	669.811	518.868	566.038	485.42	600.343	549.743	484.563	501.715	646.655	503.431	618.353	725.557	523.156	567.753	549.743	518.01	664.666
Nhsl1	1000	396.098	350.661	440.749	445.201	335.865	370.826	166.427	149.928	392.17	316.486	334.294	385.099	430.928	371.35	302.606	114.181	106.848	127.275	111.169	118.24	123.085	167.212	131.727	150.321	154.511	127.144	124.133	108.42	133.56	141.679
Hebp2	1000	66.4921	63.3508	63.8743	72.7749	60.733	76.9634	70.1571	68.0628	65.9686	68.0628	53.9267	48.1675	45.0262	60.733	35.6021	31.9372	28.7958	53.9267	44.5026	32.4607	47.644	64.9215	50.7853	61.7801	44.5026	68.0628	37.6963	26.178	41.8848	40.3141
Arfgef3	1000	454.844	289.557	452.897	407.619	342.016	366.115	330.331	269.839	372.687	244.036	269.352	335.93	538.218	363.072	319.133	447.541	496.105	457.035	364.046	425.146	278.238	458.252	384.859	377.678	413.705	305.623	358.082	301.363	369.036	304.163
Gm4922	1000	0	0	0	0	0	0	0	0	0	0	0	0	0	0	0	0	0	0	0	0	0	0	0	0	0	0	0	0	0	0
4930444F02Rik	1000	0	0	0	0.475964	0	0	0	0	0	0	0.237982	0	0	0	0	0	0	0	0	0	0	0	0	0.237982	0	0	0	0	0	0
Perp	1000	52.1053	62.1053	90	70	60.5263	187.895	128.947	83.1579	76.3158	91.0526	53.6842	75.7895	100	71.0526	93.1579	128.947	151.579	553.684	119.474	146.316	91.0526	127.368	341.579	464.737	168.421	432.105	153.684	134.211	144.737	128.421
Tnfaip3	1000	77.2579	108.161	89.445	76.8226	88.1393	78.1284	61.1534	66.5941	71.1643	67.247	66.8118	69.2057	73.5582	92.4918	72.6877	91.6213	75.7345	77.9108	72.9053	79.2165	65.9412	89.0098	85.5277	79.2165	90.9684	65.506	82.2633	53.1012	63.1121	72.0348
Gm20139	1000	0.160772	0.160772	0	0.482315	0.160772	0.160772	0.160772	0	0	0.160772	0.643087	0	0	0	0	0.482315	0.643087	0	0.160772	0.160772	0.160772	0.321543	0	0.482315	0.160772	0.482315	0.321543	0.643087	0.643087	0
Olig3	1000	0	0	0	0	0	0	0	0	0	0	0	0.484027	0	0	0	0	0	0	0	0	0	0	0	0.484027	0	0	0.484027	0	0	0
Ifngr1	1000	313.959	342.544	339.209	344.926	293.473	295.379	337.78	320.629	337.303	296.332	314.912	308.718	324.917	348.737	274.416	536.446	467.842	587.899	515.484	517.389	424.011	582.182	587.423	551.691	599.333	522.153	526.918	484.516	540.257	469.747
Il22ra2	1000	0	0.405186	0	0	0	0	0	0	0	0.810373	0.405186	0	0	0	0	1.21556	0.810373	0	0	0	0	0	0	0	0.405186	0	0	0	0.405186	0
Il20ra	1000	1.91571	2.39464	3.83142	4.78927	2.87356	0.478927	5.2682	4.78927	0	6.22605	1.91571	1.91571	1.43678	1.91571	3.83142	82.8544	79.5019	81.8966	57.4713	68.9655	30.6513	67.0498	81.8966	59.387	64.1762	91.4751	97.7011	112.069	106.801	72.7969
Slc35d3	1000	12.1719	21.3009	10.6504	13.313	16.356	14.0738	14.4542	39.5588	12.5523	14.0738	20.9205	27.0065	11.4112	22.0616	19.0186	1318.37	1215.67	1338.53	1010.27	1242.3	669.836	1201.6	1284.14	1089.01	971.852	883.226	1162.42	1276.15	1379.23	826.93
Pex7	1000	456.177	496.832	517.423	509.504	507.92	464.097	548.046	488.384	497.888	506.336	438.226	468.321	497.36	538.543	407.075	732.313	595.565	710.137	620.908	702.746	556.494	755.016	703.801	685.322	813.094	574.446	631.996	681.098	681.626	668.427
Map3k5	1000	292.045	250.695	312.627	321.342	274.059	267.384	404.969	404.599	278.88	255.702	275.357	289.82	288.708	272.205	239.199	287.224	302.615	358.613	316.892	285.555	298.721	301.873	272.39	407.751	413.684	316.892	347.302	264.602	283.33	390.321
Map7	1000	1423.36	1828.24	1564.83	1513.99	1496.79	1249.29	1494.74	1249.04	1287.55	1655.97	1714.51	1852.89	1798.72	2221.31	1605.13	1659.31	1499.61	1889.35	1469.06	1645.19	1462.39	1750.45	1583.83	1830.55	2423.62	1991.01	1954.81	2067.52	2249.04	1797.69
4930405J17Rik	1000	1.58983	1.58983	0	0	0	0	0	0	0	0	0	0	0	0	3.17965	0	0	0	0	0	0	0	0	0	0	0	0	0	0	1.58983
Gm6251	1000	15.2027	13.5135	23.6486	13.5135	6.75676	10.1351	15.2027	6.75676	8.44595	13.5135	10.1351	16.8919	15.2027	15.2027	8.44595	5.06757	8.44595	21.9595	15.2027	8.44595	21.9595	21.9595	6.75676	20.2703	27.027	27.027	23.6486	13.5135	21.9595	27.027
Mir6413	1000	0	0	0	0	0	0	0	0	0	0	0	0	0	0	0	0	0	0	0	0	0	0	0	0	0	0	0	0	0	0
Bclaf1	1000	1468.65	1328.57	1581.59	1566.37	1338.1	1239.46	1170.7	1120.1	1280.71	1163	1362.3	1354.42	1604.14	1433.44	1227.17	1616.43	1510.08	1756.33	1459.11	1604.51	1286.58	1693.8	1587.46	1645.95	1921.89	1399.89	1560.87	1547.12	1543.27	1528.79
Mtfr2	1000	10.8366	9.53619	11.7035	10.4031	4.33463	12.137	6.93541	9.10273	4.7681	9.53619	8.2358	14.7378	5.20156	8.2358	9.96966	10.4031	11.7035	9.10273	13.4374	11.7035	6.06849	14.3043	15.1712	12.5704	8.66927	11.7035	15.1712	13.4374	12.137	14.7378
Pde7b	1000	383.329	229.222	349.164	458.202	252.726	260.964	304.822	321.783	260.237	213.715	257.814	281.076	366.852	210.08	220.257	3410.95	3050.64	3122.36	2418.22	3116.55	1629.76	2970.92	3129.39	2644.54	2369.28	2953.23	3559.24	3852.19	3764.48	2485.58
Ahi1	1000	2551.63	2248.92	2811.15	2714.57	2368.47	2395.56	1760.31	1822.14	2414.41	2035.53	2376.72	2410.48	3141.74	2503.73	2402.04	2913.23	2882.02	2896.54	2314.88	3077.93	1978.41	3048.68	2785.43	3090.89	3029.45	1761.48	2299.96	2211.82	2184.73	2144.88
Myb	1000	16.6799	15.0913	8.20757	8.73709	13.7675	10.8552	4.23617	7.14853	11.6495	14.0323	9.00185	23.0342	8.20757	16.6799	9.53137	11.9142	56.394	25.9465	19.857	42.8912	13.7675	29.1236	20.9161	43.9502	38.9198	23.2989	38.1255	38.655	43.9502	23.5637
Hbs1l	1000	482.526	492.745	503.372	509.503	442.878	447.987	470.672	401.185	393.828	423.053	465.154	455.549	522.379	488.862	444.308	442.878	435.929	510.321	456.571	454.936	427.754	513.182	462.906	535.254	557.327	420.192	475.373	431.228	446.965	460.862
4930455C13Rik	1000	0	0	0	0	0	0	0	0	0	0	0	0	0	0	0	0	0.984252	0	0	0	0	0.984252	0	0	0	2.95276	0	0	0.984252	0.984252
Aldh8a1	1000	2.22916	12.4833	127.062	4.45831	8.4708	2.22916	1.78333	1.33749	117.254	16.9416	3.56665	10.7	97.6371	7.1333	57.5123	1.78333	3.12082	47.2581	1.33749	2.22916	1.33749	2.67499	2.67499	8.91663	16.9416	9.36246	5.34998	4.90415	1.33749	7.1333
1700020N01Rik	1000	0	2.82752	1.88501	5.65504	0.942507	0	0	0.942507	0	0	2.82752	3.77003	1.88501	3.77003	0	0	0	1.88501	3.77003	0.942507	0.942507	0.942507	0	0	0	0	3.77003	2.82752	2.82752	1.88501
Gm5420	1000	0	0.453309	0.453309	1.35993	0.453309	0	0	0	0	0.453309	0.453309	0.453309	0	0	0	0	0.453309	0	0.906618	0.906618	0	0	0	0	0	0	0.453309	0	0	0.906618
Sgk1	1000	594.66	739.235	758.48	611.98	606.447	692.567	580.948	408.227	605.004	615.107	770.989	917.248	828.963	950.445	694.972	894.154	877.556	1933.37	880.924	888.381	722.637	1095.74	1072.17	1319.94	1186.91	1466.68	1248.26	1100.55	1495.31	1157.08
4930444G20Rik	1000	0	0	0	0	0	0	0	0	0	0	0	0	0	0	0	0	0	0	0	0	0	0	0	0	0	0	0	0	0	0
E030030I06Rik	1000	4.363	1.3089	2.1815	2.6178	2.6178	3.4904	0.8726	1.7452	3.0541	4.363	0	0.4363	3.0541	0	1.7452	7.8534	4.363	10.0349	4.7993	10.0349	3.4904	7.8534	7.4171	8.2897	13.5253	3.0541	1.7452	0.8726	1.3089	1.3089
Raet1a	1000	0	0	1.94175	0	0	0	0	1.2945	1.2945	0	0	0	0	0	0	0	0	0.647249	0	1.2945	0	0	0.647249	0	0	0	0	0	0	0
Raet1e	1000	0	0	1.56986	0	0	0	0	0	1.56986	0	0	0	0	0	0	0	0	0.784929	0.784929	0	0	0	1.56986	2.35479	0	0	0	0	0	1.56986
Raet1b	1000	0	0	0	0	0	0	0	0	0	0	0	0	0	0	0	0	0	0	0	0	0	0	0	0	0	0	0	0	0	0
Raet1c	1000	0	0	0	0	0	0	0	0	0	0	0	0	0	0	0	0	0	0	0	0	0	0	0	0	0	0	0	0	0	0
H60b	1000	11.5668	2.10305	6.30915	3.15457	5.25762	7.36067	39.9579	45.2156	9.46372	2.10305	5.25762	3.15457	4.2061	1.05152	5.25762	42.061	33.6488	50.4732	46.2671	29.4427	63.0915	48.3701	54.6793	74.6583	70.4522	26.2881	36.8034	5.25762	8.4122	42.061
C920009B18Rik	1000	0	0	0.442968	0.885936	0	0.442968	0.442968	0	0	0	0.442968	0.664452	0	0	0	0.664452	0	1.10742	0	0.221484	0.664452	0.664452	0.885936	0.885936	1.55039	0.885936	0.442968	0.885936	0	0.221484
Raet1d	1000	0	0	0	0	0.786782	0	1.57356	0	1.57356	0	0	0	2.36035	0	0	0	0	0	0	0	1.57356	0.786782	0.786782	0	1.57356	0	0	0	0.786782	2.36035
Gm10825	1000	0	0.659631	0	0.219877	0	0.219877	0.439754	0.659631	0	0	0	0.219877	0.219877	0.219877	0	0.219877	0.439754	0	0	1.09938	0	0.219877	0	0	0.879507	0.219877	0.219877	0	0	0.439754
Slc2a12	1000	58.4795	41.9989	56.8846	52.3658	47.8469	221.425	40.404	27.1132	36.9484	38.8091	40.404	48.9102	53.9607	46.7836	38.2775	48.9102	53.1632	917.863	52.6316	56.8846	30.8347	52.6316	481.659	716.374	71.2387	698.033	47.3153	47.5811	64.0617	28.7081
Tbpl1	1000	998.957	974.261	1061.91	1064.7	980.522	933.913	1004.17	933.913	945.391	871.652	1079.65	954.435	1172.52	1038.96	963.826	1007.3	1016	1107.13	1008.7	1054.96	853.565	1154.78	1009.39	1107.83	1164.17	793.043	976.696	931.13	934.261	1042.09
Mir7663	1000	32.7869	65.5738	32.7869	32.7869	32.7869	16.3934	32.7869	0	65.5738	32.7869	49.1803	32.7869	131.148	0	65.5738	32.7869	49.1803	180.328	49.1803	49.1803	16.3934	0	32.7869	49.1803	131.148	81.9672	98.3607	163.934	131.148	81.9672
Tcf21	1000	0.814996	0	6.51997	0	0	8.14996	0	0	0.814996	0	0	1.62999	0	0	0	0.814996	0	22.8199	1.62999	2.44499	0	0.814996	16.2999	17.9299	0	26.0799	0	0	0	0.814996
Eya4	1000	59.2828	60.9905	67.5775	60.5026	51.232	54.4035	72.7007	53.9156	49.7682	58.3069	49.5243	61.2344	46.8407	51.7199	33.4228	40.7416	36.8383	44.889	61.2344	45.3769	64.162	53.9156	44.1571	55.8673	102.22	36.3503	35.8624	34.6426	32.6909	79.7756
Rps12	1000	8312.74	10310.8	10550.2	10083	9171.81	8700.77	9194.98	7658.3	8756.76	9245.17	10758.7	9785.71	10758.7	10094.6	9198.84	11884.2	10368.7	13776.1	11069.5	12214.3	10133.2	13370.7	11471	12434.4	13853.3	11835.9	12654.4	14428.6	14536.7	13098.5
Snora33	1000	57.1429	114.286	133.333	200	152.381	238.095	104.762	66.6667	133.333	85.7143	209.524	133.333	123.81	123.81	142.857	190.476	95.2381	190.476	142.857	171.429	66.6667	190.476	85.7143	133.333	161.905	133.333	180.952	142.857	123.81	171.429
Snord100	1000	73.5294	220.588	279.412	323.529	205.882	308.824	250	220.588	294.118	279.412	147.059	117.647	176.471	205.882	308.824	147.059	205.882	161.765	264.706	264.706	147.059	220.588	250	132.353	264.706	220.588	161.765	58.8235	352.941	250
Slc18b1	1000	467.043	383.151	425.802	481.495	432.499	431.794	299.26	328.516	372.929	369.052	370.462	377.511	471.625	378.569	342.968	393.021	320.761	430.032	354.247	383.504	335.918	368.699	379.274	409.235	419.81	274.938	276.348	301.727	295.735	304.195
Vnn3	1000	0.552181	1.65654	38.1005	1.65654	0	2.76091	1.10436	0.552181	35.3396	3.31309	0.552181	1.10436	21.5351	4.41745	11.0436	0	1.65654	7.73054	0	2.20872	0.552181	0	0	0.552181	2.20872	2.76091	1.10436	0	0	4.96963
Vnn1	1000	4.55298	6.62252	13.245	4.13907	2.48344	2.89735	5.7947	14.0728	16.1424	5.38079	1.65563	3.31126	17.798	4.55298	11.5894	2.48344	4.13907	12.0033	2.89735	6.20861	1.65563	2.89735	6.62252	12.0033	7.45033	4.55298	5.38079	8.69205	4.13907	10.3477
Taar1	1000	0	0	0	0	0	0	0	0	0	0	0	0	0	0	0	0	0	0	0	0	0	0	0	0	0	0	0	0	0	0
Taar2	1000	0	0	0	0	0	0	0	0	0	0	0	0	0	0	0	0	0	0	0	0	0	0	0	0	0	0.980392	0	0	0	0
Taar3	1000	0	0	0	0	0	0	0	0	0.968992	0	0	0	1.93798	0	0	0	0	0	0	0	0	0	0	0	0.968992	0	0	0	0	0
Taar4	1000	0.957854	0	0	0	0	0	0	0	0	0	0	2.87356	0	0	0	0	0	0	0	0	0	0	0	0	0	0	0	0	0	0
Taar5	1000	0	0	0.986193	0	0	0	0.986193	0	0	0	0	0	0	0	0	0	0	0	0	0	0	0	0	0	0	0	0	0	0	0
Taar6	1000	0	0	0	0	0	0	0	0	0	0	0	0	0	0	0	0	0	0	0	0	0	0	0	0	0	0	0	0	0	0
Taar7a	1000	0	0	0	0	0	0	0	0	0	0	0	0	0	0	0	0	0	0	0	0	0	0	0	0	0	0	0	0	0	0
Taar7b	1000	0	0	0	0	0	0	0	0	0	0	0	0	0	0	0	0	0	0	0	0	0	0	0	0	0	0	0	0	0	0
Taar7d	1000	0	0	0	0	0	0	0	0	0	0	0	0	0	0	0	0	0	0	0	0	0	0	0	0	0	0	0	0	0	0
Taar7e	1000	0	0	0	0	0	0	0	0	0	0	0	0	0	0	0	0	0	0	0	0	0	0	0	0	0	0	0	0	0	0
Taar7f	1000	0	0	0	0	0	0	0	0	0	0	0	0	0	0	0	0	0	0	0	0	0	0	0	0	0	0	0	0	0	0
Taar8a	1000	0	0	0	0	0	0	0	0	0	0	0	0	0	0	0	0	0	0	0	0	0	0	0	0	0	0	0	0	0	0
Taar8b	1000	0	0	0	0	0	0	0	0	0	0	0	0	0	0	0	0	0	0	0	0	0	0	0	0	0	0	0	0	0	0
Taar8c	1000	0	0	0	0	0	0	0	0	0	0	0	0	0	0	0	0	0	0	0	0	0	0	0	0	0	0	0	0	0	0
Taar9	1000	0	0	0	0	0	0	0	0	0	0	0	0	0	0	0	0	0	0	0	0	0	0	0	0	0	0	0	0	0	0
Stx7	1000	1846	2082.4	2092.8	2160.4	2018	1827.6	2007.6	1918	1948.4	1920.4	1879.6	1850	2208.4	2110	1816	1927.6	1763.6	2076	2015.6	1901.6	1917.2	2170	2000.4	2111.6	2484.4	1682	1710.4	1737.6	1726.4	2076
Moxd1	1000	95.0373	88.8745	85.3065	100.876	86.604	107.687	97.3078	99.5783	87.9014	80.7655	75.9001	100.551	112.877	89.1988	82.7116	99.9027	98.6053	156.017	120.013	124.878	105.417	90.8206	135.258	155.693	130.392	163.801	122.608	111.255	125.203	120.662
Ctgf	1000	29.5587	142.798	61.199	56.6195	53.7052	72.4396	495.004	333.472	64.9459	134.888	112.406	97.0025	74.1049	134.888	47.8768	31.6403	66.6112	208.993	360.533	88.6761	540.799	65.7785	58.7011	433.805	643.63	446.295	393.006	121.982	196.919	702.748
Enpp1	1000	32.7385	65.3296	48.6654	49.5502	46.4533	36.4253	60.3156	40.407	41.4393	55.8915	32.7385	44.2413	37.6051	52.7946	35.0981	94.2339	83.321	98.658	80.814	99.2479	93.3491	110.013	92.3168	73.4405	136.853	76.6849	59.2833	82.7312	84.9432	73.588
Enpp3	1000	5.3286	10.302	24.8668	6.03908	5.3286	8.17052	11.3677	6.74956	24.5115	4.26288	3.19716	3.5524	23.4458	3.90764	12.0782	17.4067	15.9858	25.222	14.5648	18.8277	14.2096	25.222	23.4458	14.2096	13.1439	11.7229	6.39432	11.3677	13.4991	9.59147
Med23	1000	510.918	475.334	565.507	531.338	474.121	412.252	428.225	420.744	475.334	409.422	452.891	454.913	594.218	510.918	455.722	526.688	516.579	593.611	487.06	509.3	407.198	560.049	533.158	545.087	625.758	448.443	534.169	534.776	519.207	507.076
Mir6905	1000	28.5714	128.571	71.4286	71.4286	71.4286	85.7143	57.1429	85.7143	28.5714	171.429	128.571	85.7143	71.4286	171.429	157.143	14.2857	85.7143	42.8571	14.2857	57.1429	42.8571	28.5714	71.4286	42.8571	85.7143	14.2857	28.5714	0	128.571	142.857
Arg1	1000	3.38524	41.2999	504.401	4.73934	41.2999	4.06229	4.06229	1.3541	526.743	112.39	19.6344	60.9343	529.452	39.9458	261.341	2.03114	9.47867	180.772	0.677048	13.541	1.3541	0	0	24.3737	74.4753	29.7901	3.38524	5.41638	20.3114	23.6967
Akap7	1000	673.071	593.66	699.007	690.042	543.388	556.516	703.49	638.809	516.811	545.629	590.778	554.595	668.268	523.215	537.944	344.541	298.751	382.645	392.251	341.338	447.646	406.66	325.648	440.602	654.179	323.407	380.403	331.092	354.467	543.388
Epb4,1l2	1000	799.014	960.789	866.906	898.947	805.064	734.932	945.552	902.308	777.28	804.392	761.819	821.869	911.943	952.498	716.782	1417.21	1238.63	1354.47	1270.89	1457.54	1201.21	1471.66	1375.76	1245.8	1734.93	1259.02	1350.44	1436.03	1463.14	1261.71
Smlr1	1000	8.90208	1.48368	26.7062	1.48368	2.96736	10.3858	1.48368	0	20.7715	16.3205	7.4184	8.90208	32.6409	1.48368	22.2552	0	2.96736	16.3205	4.45104	4.45104	4.45104	5.93472	2.96736	20.7715	4.45104	4.45104	2.96736	1.48368	1.48368	11.8694
4930401C15Rik	1000	0	0	0	0	0	0	0	0	0	0	0	0	0	0	0	0	0	0	1.15607	0	0	0	0	0	0	0	0	0	0	0
Mir680-3	1000	0	0	0	0	0	0	0	0	0	0	0	0	0	0	0	0	0	0	0	0	0	0	0	0	0	0	0	0	0	0
Tmem200a	1000	244.228	317.132	289.915	308.141	318.834	276.549	187.606	210.693	271.203	268.287	300.122	316.889	485.784	430.62	415.067	18.955	16.5249	23.0863	50.7898	18.955	58.3232	20.8991	18.469	44.4714	72.661	24.7874	39.1252	18.469	18.712	101.58
Gm9767	1000	6.70578	15.088	13.4116	13.4116	11.7351	10.8969	12.5733	24.3085	23.4702	11.7351	18.4409	15.9262	17.6027	18.4409	14.2498	0.838223	0.838223	0	2.51467	1.67645	5.86756	2.51467	0.838223	5.86756	6.70578	1.67645	0	3.35289	0.838223	4.19111
Samd3	1000	1.68824	0.562746	0.281373	0.844119	3.0951	5.62746	9.00394	6.19021	0.844119	1.68824	0.844119	9.28531	0	1.68824	1.40687	1.12549	0	0.844119	1.96961	0.562746	3.0951	0.562746	0.562746	0.562746	6.47158	0.562746	0	0.562746	0	5.06472
L3mbtl3	1000	245.383	216.652	254.471	265.611	212.548	240.692	307.534	272.061	219.584	202.287	206.391	209.323	246.848	206.391	188.508	248.314	235.415	375.257	300.205	242.158	226.327	290.824	270.888	425.682	312.811	300.792	230.724	187.921	201.7	231.604
Gm8709	1000	0	0	0	0	0	0	0	0	0	0	0	0	0	0	0	0	1.65837	0	0	0.829187	0	0	0	0	0	0	0	0	0	0
Arhgap18	1000	76.3274	73.2854	94.8562	89.8783	74.115	95.4093	117.257	105.365	81.0288	87.1128	79.3695	92.0907	73.2854	72.4558	52.8208	193.031	252.765	324.668	175.055	226.77	143.529	227.6	250	320.52	225.94	252.212	249.17	270.188	261.892	186.947
Lama2	1000	100.484	104.808	104.087	117.883	95.9539	95.4391	98.5277	78.0397	83.4963	94.9243	71.6565	99.5573	101.41	119.633	82.055	114.486	106.97	135.9	109.029	124.061	117.986	134.356	122.619	110.059	153.197	97.0864	108.926	113.044	126.737	90.2914
4930579H20Rik	1000	0	0	0	0	0	0	0	0	0	0	0	0	0	0	0	0	0	0	0	0	0	0	0	0	0	0	0	0.659631	0	0
Ptprk	1000	612.433	436.134	533.592	540.877	467.703	480.168	612.595	541.201	465.436	380.605	405.051	462.037	531.164	414.926	389.671	138.902	118.99	255.464	269.386	150.235	299.012	169.824	177.756	305.488	322.81	238.951	178.889	139.064	145.054	323.944
Themis	1000	0.330196	0.165098	0.495295	0.165098	0.330196	0.165098	0.990589	0.330196	0.165098	0.330196	0.495295	0.825491	2.31138	0.165098	0.495295	0.165098	0	0.330196	0.165098	0.330196	0	0	0	0.165098	1.15569	0.165098	0.165098	0.165098	0	0.330196
4930519F09Rik	1000	0.647249	0	0	0	0	0	1.2945	0	0	0	0	0.647249	0	0	1.2945	1.2945	1.2945	0.647249	0	0	0	0	0.647249	0	0	0	0	1.2945	0.647249	0
2310057J18Rik	1000	0	2.27445	0.75815	0	0	0	0	1.5163	0	0	0	0	0	0	1.5163	0	0	0	0	0	0	0	0	0	0	0	0	0	0	0
Soga3	1000	942.727	830.208	935.884	989.356	859.098	813.735	696.401	618.094	859.858	733.908	706.792	799.037	1038.01	944.247	731.12	910.035	879.625	868.981	868.474	864.673	692.854	1035.23	849.214	869.742	956.412	676.888	769.133	728.332	777.75	779.777
9330159F19Rik	1000	935.152	1019.14	1044.65	1079.91	940.468	868.001	854.181	772.325	801.382	883.416	992.204	1018.25	1029.77	1012.05	854.359	861.091	836.818	835.755	804.571	828.845	759.213	898.476	762.225	862.155	1033.84	728.384	838.59	753.544	805.634	795.535
Echdc1	1000	385.849	426.73	421.069	416.352	396.541	365.409	375.157	325.472	408.491	346.855	398.113	413.208	482.075	444.34	379.245	413.208	333.333	425.786	387.736	426.415	374.528	470.126	422.327	408.805	508.491	390.566	392.767	395.283	406.289	441.509
Rnf146	1000	689.856	710.503	770.197	763.689	738.33	655.072	592.011	560.817	680.431	629.488	682.226	673.698	816.203	751.346	678.411	527.828	486.984	559.919	529.847	525.359	524.237	623.878	550.269	581.463	689.183	500.673	549.82	456.014	537.029	605.476
Rspo3	1000	196.16	239.983	262.104	274.207	256.26	210.768	282.554	228.297	220.367	201.586	161.102	156.511	211.603	190.735	173.205	36.7279	35.0584	39.6494	90.1503	33.8063	129.382	66.3606	43.823	84.7245	111.853	72.621	66.3606	32.5543	42.1536	103.088
Cenpw	1000	90.6085	66.7989	76.7196	97.8836	91.9312	56.8783	76.7196	78.0423	78.0423	62.8307	95.2381	76.7196	104.497	84.6561	74.7354	56.2169	52.2487	46.2963	48.2804	50.9259	54.2328	46.9577	44.3122	80.6878	91.9312	64.8148	54.2328	51.5873	62.1693	93.9153
Trmt11	1000	172.955	177.618	188.639	178.465	175.922	137.77	159.813	136.922	140.738	149.64	145.825	148.792	169.987	155.998	144.553	146.672	134.379	164.053	155.15	158.966	140.314	166.172	165.748	155.998	184.824	128.868	143.281	140.738	150.487	147.52
Gm20300	1000	575.291	681.686	634.012	640.407	578.198	533.721	768.895	645.93	547.093	678.488	611.919	575	600	616.279	518.023	677.616	579.942	801.453	696.802	698.547	733.43	792.151	660.465	738.953	985.174	658.14	627.035	615.407	649.709	750
Hint3	1000	448.276	517.241	520.115	537.356	466.954	469.828	515.805	387.931	468.391	432.471	418.103	419.54	471.264	561.782	419.54	616.379	613.506	658.046	573.276	716.954	594.828	742.816	662.356	747.126	817.529	576.149	577.586	475.575	616.379	643.678
Ncoa7	1000	829.712	792.432	802.36	868.115	783.252	699.7	727.426	672.349	753.091	693.706	663.17	714.687	798.239	750.843	629.449	719.183	640.127	704.384	701.012	689.397	633.009	799.176	704.946	747.284	833.646	583.177	696.328	624.953	641.251	782.877
Hey2	1000	62.0063	68.3254	73.0648	64.7709	61.2164	74.2496	68.3254	68.7204	67.1406	61.2164	57.6619	67.5355	63.1912	63.5861	40.2844	102.291	107.425	198.657	77.0142	91.2322	86.8878	108.215	154.423	185.229	106.24	150.474	105.45	104.66	127.172	75.0395
Hddc2	1000	583.565	518.106	614.206	543.175	555.71	523.677	454.039	441.504	502.786	504.178	520.891	474.93	662.953	518.106	501.393	708.914	664.345	810.585	610.028	667.131	512.535	700.557	789.694	781.337	678.273	569.638	621.17	622.563	664.345	636.49
Tpd52l1	1000	1070.24	820.837	1073.4	1154.7	920.284	987.372	614.049	572.218	900.552	842.936	764.009	847.672	1020.52	802.684	732.439	1423.84	1477.51	1844.51	1214.68	1550.12	920.284	1561.96	1598.26	1606.16	1335.44	1677.19	1594.32	1660.62	1643.25	1282.56
Gm3258	1000	11.2676	4.22535	9.85915	1.40845	4.22535	2.8169	1.40845	2.8169	4.22535	2.8169	2.8169	2.8169	4.22535	5.6338	4.22535	4.22535	1.40845	1.40845	5.6338	7.04225	5.6338	11.2676	8.4507	2.8169	9.85915	1.40845	14.0845	8.4507	0	5.6338
Rnf217	1000	160.839	131.119	173.077	148.951	135.664	120.28	184.266	160.839	132.517	113.636	114.685	120.28	167.832	115.385	105.594	153.497	161.538	193.007	161.189	161.538	131.818	194.406	145.455	178.322	169.93	106.294	130.769	127.273	129.021	137.063
Nkain2	1000	865.955	845.394	891.589	875.033	765.287	713.752	802.136	804.005	728.972	713.485	698.798	771.429	888.919	849.666	674.499	1134.05	1114.55	1224.57	986.382	1210.95	897.73	1193.06	1198.93	1137.78	1311.62	888.385	1081.17	1131.64	1103.87	995.728
Trdn	1000	4.20913	2.21533	2.87993	2.43686	2.6584	3.323	1.10767	0.664599	1.9938	1.10767	1.3292	1.55073	2.21533	1.77226	1.10767	2.6584	0.443066	0	0	0	0.221533	0.221533	0	0	0.221533	0	0.221533	0	0.664599	0.886132
D830005E20Rik	1000	0	0	0	0	0	0	0	0	0	0	0	0	0	0	0	0	0	0	0	0	0	0	0	0	0	0	0	0	0	0
Clvs2	1000	974	866	1026	1032	918.4	800.4	530	482.8	838.4	745.6	921.2	868.8	1146.8	906.8	927.2	534.4	448	482.8	503.2	496.8	481.6	602.8	497.6	533.2	575.2	378.8	407.2	384.4	396.4	494
Gm4794	1000	0	0	4.53515	0	0	0	0	0	22.6757	0	0	0	0	1.13379	0	0	0	2.26757	0	0	0	0	0	0	1.13379	1.13379	0	0	0	0
Sult3a1	1000	0	0	40.146	0.912409	0	0	0	0	124.088	6.38686	0	0	0	6.38686	0.912409	0	0	28.2847	0	0.912409	0.912409	0	0	0	6.38686	2.73723	0	0	0	0.912409
Rsph4a	1000	70.9589	73.6986	55.6164	34.2466	73.6986	79.4521	34.2466	41.0959	65.4795	65.4795	30.411	100	48.7671	67.3973	46.5753	62.1918	165.753	197.26	93.1507	126.027	57.2603	111.233	128.767	227.945	120	133.425	112.329	109.589	115.068	60
Zufsp	1000	151.438	126.904	159.052	187.394	142.978	113.367	124.365	129.865	129.019	116.328	142.555	146.362	170.474	142.555	122.25	158.206	161.168	174.281	135.364	178.088	136.633	178.934	158.206	144.67	163.706	128.173	148.054	137.902	146.785	149.746
A830082N09Rik	1000	192.219	182.781	191.071	198.724	181.633	164.541	175.638	163.903	188.138	159.949	182.143	184.184	226.531	195.791	173.597	166.582	148.852	168.367	164.158	165.306	144.26	199.49	160.842	173.724	227.806	146.939	172.194	167.985	168.495	180.102
Rwdd1	1000	1205.18	1174.68	1341.96	1370.61	1253.23	1094.27	1079.48	963.956	1117.38	1130.31	1245.84	1187.62	1457.49	1316.08	1238.45	1292.98	1077.63	1297.6	1234.75	1283.73	982.44	1469.5	1266.17	1256.01	1459.33	992.606	1126.62	1042.51	1073.94	1262.48
Trappc3l	1000	4.21941	5.90717	3.37553	2.53165	3.37553	0	5.06329	1.68776	4.21941	0	3.37553	3.37553	2.53165	4.21941	2.53165	2.53165	2.53165	2.53165	1.68776	2.53165	0.843882	2.53165	2.53165	7.59494	2.53165	4.21941	6.75105	0	1.68776	5.06329
Fam26d	1000	0	0	0	1.07701	0	0.538503	0.269251	0.538503	0	0.269251	0	0.807754	0	0.269251	0.269251	0	0	0	0.538503	0	0.269251	0.269251	0	0.269251	0	0	0	0	0	0
Fam26e	1000	170.773	146.137	153.415	188.69	161.814	147.816	127.1	147.256	155.095	166.853	159.015	161.254	185.33	184.211	170.773	99.6641	92.3852	110.862	113.102	124.86	94.6249	92.9451	107.503	118.701	141.657	80.0672	91.2654	66.6293	71.6685	132.699
Fam26f	1000	1.84843	4.62107	9.24214	11.0906	2.77264	3.69686	1.84843	5.54529	7.39372	6.4695	4.62107	1.84843	12.939	5.54529	12.0148	16.6359	11.0906	18.4843	16.6359	12.0148	12.939	11.0906	22.1811	16.6359	12.939	12.0148	12.0148	15.7116	12.939	12.0148
Dse	1000	90.4142	91.3609	101.775	108.639	82.1302	84.7337	87.1006	69.3491	74.5562	84.497	87.574	89.9408	123.55	109.586	87.1006	54.9112	52.7811	62.0118	57.7515	45.2071	52.7811	69.8225	52.5444	55.1479	73.6095	53.9645	43.3136	35.0296	42.3669	58.9349
Tspyl1	1000	3821.96	3817.88	4252.97	4079.01	3749.26	3590.5	3544.88	3187.69	3587.17	3503.71	3538.95	3723.29	4455.49	4017.43	3678.78	4345.7	3981.08	4308.61	4070.85	4092.73	3768.55	4577.52	4227	4366.84	4707.34	3675.45	4029.67	3753.34	3936.94	4247.77
Tspyl4	1000	6967.95	6913.85	7406.41	7759.49	6855.13	6371.54	7288.21	6245.9	6904.62	6749.23	6194.62	6402.82	7399.49	7140	6105.64	7814.62	6777.69	7331.03	7596.92	7105.13	6737.69	9218.97	7399.23	7730.26	8244.62	6036.15	6330.51	5792.31	6180.26	7447.95
Nt5dc1	1000	65.5376	47.4963	60.0147	64.433	47.8645	85.0515	41.9735	37.187	54.4919	45.6554	42.3417	43.0781	57.8056	45.2872	45.6554	61.4875	51.9146	155.744	67.7467	79.8969	66.6421	67.7467	120.766	129.971	80.6333	104.566	44.1826	68.1149	60.3829	48.2327
Col10a1	1000	1.59744	0.958466	1.27796	1.59744	0.958466	1.27796	1.27796	1.91693	0	0.638978	0.319489	0.638978	2.23642	1.59744	2.55591	0.958466	0	0.319489	0	0.319489	0.638978	1.27796	1.91693	1.59744	0.958466	0.638978	0	1.27796	0.319489	0.319489
Frk	1000	1.45742	3.12305	4.16406	6.87071	3.95586	8.74453	8.74453	4.78867	4.37227	2.91484	3.33125	2.08203	4.16406	3.33125	3.12305	2.49844	1.04102	20.1957	2.08203	2.91484	1.87383	3.33125	11.4512	20.1957	4.37227	15.8234	3.12305	2.91484	2.70664	6.4543
Hs3st5	1000	22.9402	24.8788	18.0937	17.7706	15.5089	16.8013	75.9289	82.0679	20.3554	13.8934	20.3554	14.5396	17.4475	15.5089	19.3861	284.006	245.234	244.911	229.402	272.052	185.46	250.404	243.296	215.832	223.91	209.693	244.911	225.525	205.17	214.216
Hdac2	1000	2088.32	1933.63	2211.08	2304.39	1925.65	1827.84	1543.91	1494.01	1854.79	1665.67	1880.24	1874.75	2181.14	1911.18	1718.56	2400.7	2238.02	2439.62	2244.51	2401.2	1825.35	2467.56	2280.94	2405.19	2401.7	1737.03	1974.55	2048.4	1990.02	2020.96
Marcks	1000	1784.76	1753.23	2135.69	2197.09	1622.55	1638.32	2168.9	1997.13	1819.4	1661.97	1391.3	1369.09	1633.78	1481.37	1264.93	2456.28	2709.03	2601.77	2360.73	2522.93	1952.94	2688.01	2241.76	2523.17	2753.23	1491.64	2059.48	2118.73	2034.4	2123.27
4930591E09Rik	1000	0	0	0	0	0	0	0	0	0	0	0	0	0	0	0	0	0	0	0	0	0	0	0	0	0	0	0	0	0	0
Rfpl4b	1000	0	0	0	0	0	0	0	0	0	0	0	0	0	0	0	0	0	0	0	0	0	0.948767	0	0	0	0	0	0	0	0
Lama4	1000	32.2527	35.2299	39.3649	42.5074	24.479	30.5987	78.2335	64.8363	25.8022	36.3877	30.1025	19.6824	22.9904	29.1102	20.1786	29.1102	25.6368	30.5987	30.4333	26.96	34.2375	35.5607	35.0645	27.6216	49.9504	36.2223	32.5835	22.825	30.7641	39.6957
Fam229b	1000	413.699	439.726	441.096	431.507	432.877	367.123	443.836	408.219	375.342	458.904	376.712	336.986	401.37	380.822	360.274	484.932	520.548	473.973	421.918	504.11	378.082	489.041	465.753	530.137	665.753	376.712	482.192	560.274	519.178	482.192
Tube1	1000	48.4807	53.6019	57.3575	54.9676	51.212	41.9939	40.6282	35.507	40.9696	43.0181	48.4807	39.2625	50.5292	43.0181	44.3837	54.9676	46.0908	64.5271	52.9191	58.3817	52.5777	64.1857	50.1878	64.1857	63.5029	42.3353	44.0423	61.113	48.8221	48.8221
Wisp3	1000	0	13.3992	4.23131	4.23131	4.23131	6.34697	4.23131	2.82087	4.23131	7.7574	7.7574	2.82087	4.93653	0.705219	2.11566	5.64175	0.705219	1.41044	4.23131	2.11566	2.11566	4.93653	2.82087	2.82087	7.05219	2.82087	1.41044	3.52609	0.705219	4.23131
Fyn	1000	1856.99	1775.58	1973.68	1916.96	1779.38	1609.77	1372.59	1306.38	1672.18	1569.61	1606.51	1665.4	2011.67	1775.31	1532.7	1392.94	1237.18	1416.01	1311.53	1369.06	1196.74	1592.67	1332.16	1411.4	1685.75	1194.03	1327	1321.03	1380.19	1353.6
Traf3ip2	1000	21.2766	14.6495	16.3934	14.3007	17.7886	28.2525	10.4639	8.71992	15.3471	15.3471	13.9519	18.4862	11.1615	18.1374	16.0446	10.8127	13.2543	39.414	11.1615	17.091	10.8127	13.6031	22.323	33.1357	13.9519	33.1357	10.8127	12.2079	15.3471	8.71992
E130307A14Rik	1000	578.125	637.62	680.288	658.053	635.817	572.716	496.394	491.587	509.014	578.726	620.793	591.346	724.159	623.197	622.596	530.048	537.861	615.385	501.803	527.043	445.913	565.505	505.409	612.981	623.197	493.99	553.486	618.389	668.269	519.832
Rev3l	1000	346.835	264.698	358.368	347.117	292.171	279.887	202.063	174.308	299.109	221.378	260.759	259.634	355.368	265.073	250.445	311.861	327.52	355.087	261.416	323.863	228.973	323.207	303.797	322.738	324.988	230.005	271.542	264.416	292.171	246.601
AA474331	1000	181.818	185.659	184.379	161.332	152.369	156.21	156.21	161.332	157.49	166.453	137.004	156.21	194.622	184.379	140.845	180.538	194.622	161.332	153.649	148.528	130.602	171.575	167.734	216.389	195.903	154.93	170.294	192.061	183.099	171.575
2010001E11Rik	1000	0	0	0	0	0	0.875274	0	0	0	0	0	1.31291	0	0	0	0.437637	0	0	0	0	0.437637	0	0.437637	1.31291	0.875274	0	0	0.437637	0.437637	0
G630090E17Rik	1000	0.561167	0.561167	8.41751	2.24467	1.12233	5.61167	1.6835	3.367	3.92817	1.6835	1.12233	1.12233	6.73401	0.561167	2.80584	0	3.367	2.24467	0	0	3.367	0	1.12233	1.6835	2.24467	0.561167	3.367	0.561167	0	5.61167
BC021785	1000	0.668784	0	1.17037	0.835981	0	1.67196	0	0.334392	0.835981	0.835981	0.835981	0.167196	0.167196	0.668784	0.668784	1.17037	0.835981	1.17037	0.501588	0.334392	0.835981	0.334392	0.167196	0.835981	0.334392	0.167196	0.167196	0.334392	1.00318	0.167196
AI317395	1000	13.8111	13.8111	30.2352	17.1706	12.318	11.5715	7.83875	8.58529	18.2904	13.0646	7.0922	14.1844	30.6084	16.7973	20.9033	9.33184	11.5715	18.2904	14.1844	10.0784	11.5715	12.318	11.9448	16.0508	23.5162	8.95857	6.71892	15.3042	25.0093	20.1568
Slc16a10	1000	51.2508	45.302	81.147	50.9457	41.9463	42.2514	25.7779	19.5241	56.5894	37.8279	41.1836	50.0305	62.2331	37.9805	44.8444	12.8127	7.32154	16.0159	17.6937	13.1178	22.2697	12.8127	10.0671	12.8127	26.083	13.4228	8.23673	7.47407	11.2874	24.1001
Rpf2	1000	421.693	418.519	446.032	442.857	389.947	386.243	334.392	292.593	369.312	359.788	398.413	376.19	483.598	394.709	363.492	396.825	340.212	384.656	366.667	404.233	335.45	406.349	385.714	376.19	474.603	356.085	349.206	403.175	353.439	429.63
Gtf3c6	1000	600	690.196	708.824	628.431	607.843	587.255	553.922	507.843	588.235	612.745	588.235	581.373	667.647	648.039	610.784	776.471	656.863	883.333	671.569	827.451	701.961	815.686	788.235	819.608	931.373	639.216	622.549	674.51	711.765	647.059
Amd1	1000	0	0.311915	0	0	0	0	0	0	0	0	0	0	0	0.62383	0	0	0	0	0	0	0	0	0	0	0	0	0.62383	0	0	0.311915
Amd2	1000	0	0	0	0	0	0	0	0	0	0	0	0	0	0	0	0	0	0	0	0	0	0	0	0	0	0	0	0	0	0
Cdk19	1000	721.887	841.226	773.205	814.19	726.02	585.328	760.806	644.222	697.779	676.942	745.307	838.299	852.075	982.779	771.655	1316.51	1094.02	1308.08	1188.74	1381.78	1173.58	1321.34	1261.41	1191.32	1510.94	1307.04	1368.52	1494.75	1573.27	1355.09
Slc22a16	1000	0	0	0	0	0	0	0	0	0	0	0	0	0	0	0.445831	0	0	0	0	0	0	0	0	0	0	0	0	0	0	0
Ddo	1000	154.667	145.333	152.667	175.333	128	137.667	90.3333	74.6667	139.333	165.667	181	192	216	165.333	155	91	101.333	113	97.3333	101.333	88.6667	126.667	99.3333	139	169.667	110.667	115.333	111.333	128	103
Mettl24	1000	42.5114	28.777	32.7011	27.4689	28.777	32.0471	35.9712	28.777	18.3126	27.4689	28.123	40.5494	48.3976	28.123	21.5827	24.8528	17.6586	21.5827	30.085	18.3126	32.7011	24.1988	18.3126	37.9333	48.3976	26.8149	23.5448	28.777	17.6586	52.3218
Cdc40	1000	1259.44	1091.23	1332.84	1270.43	1177.41	1051.71	585.141	609.807	1019.61	836.553	1263	1243.98	1733.73	1404.16	1327.49	814.264	767.311	825.26	699.257	832.392	589.302	781.872	847.548	760.773	841.902	684.101	784.25	844.874	812.779	725.706
Wasf1	1000	7569.41	6746.27	7760.39	7074.12	7269.02	6451.37	4103.14	4158.43	6589.02	5479.61	7240.39	7789.41	10481.6	8178.04	7998.04	4624.71	4263.53	4506.67	3961.57	4374.9	3579.22	4673.73	4625.1	4539.22	4730.98	3708.24	4472.94	4482.35	4355.69	4300.78
Gpr6	1000	20.1465	21.0623	10.989	28.3883	18.315	19.2308	36.63	109.89	17.3993	21.978	16.4835	12.8205	17.3993	19.2308	20.1465	2463.37	2156.59	2357.14	1774.73	2081.5	1204.21	2116.3	2427.66	1846.15	1552.2	2459.71	3021.06	3261.9	3398.35	1954.21
Fig4	1000	676.065	663.193	702.728	734.294	673.307	607.11	464.603	458.78	612.013	584.738	618.756	592.706	748.085	677.291	589.029	739.81	732.455	824.701	652.774	782.102	528.042	766.473	759.424	756.666	743.488	649.402	848.606	780.264	861.784	692.614
Zbtb24	1000	173.771	193.571	208.013	187.049	171.908	165.153	147.915	136.268	156.534	149.08	176.799	180.526	201.258	191.707	164.454	188.446	196.599	218.262	176.334	206.615	145.586	192.639	185.418	197.531	213.836	169.113	170.277	180.294	186.35	176.101
Mical1	1000	150.716	144.541	166.994	145.944	160.82	137.525	157.452	131.911	126.017	136.963	134.157	118.159	166.713	138.086	108.616	131.35	133.034	143.699	127.421	138.647	127.982	159.697	156.61	147.348	154.926	127.982	128.543	151.277	162.223	135.279
Smpd2	1000	388.889	388.265	460.05	419.476	367.665	390.762	300.874	254.057	353.933	338.327	421.973	377.653	485.019	400.749	419.476	323.97	300.874	438.202	332.709	320.225	299.001	368.29	380.15	427.591	361.423	384.519	337.079	386.392	358.302	312.734
Ppil6	1000	156.075	130.841	126.168	135.514	128.972	139.252	119.626	102.804	128.037	129.907	147.664	202.804	150.467	165.421	140.187	99.0654	151.402	166.355	103.738	133.645	101.869	118.692	135.514	171.963	153.271	151.402	145.794	166.355	215.888	140.187
Cd164	1000	1017.31	1134.98	1217.67	1169.26	972.085	1191.87	1145.58	1022.97	1023.32	1048.06	1028.62	1027.92	1142.05	1130.74	954.77	1257.6	1148.06	2415.19	1219.08	1268.55	1187.99	1382.33	1797.17	2015.55	1779.86	1844.17	1283.75	1181.63	1263.96	1308.13
Ccdc162	1000	23.2558	18.5418	20.4274	12.885	23.5701	28.9126	10.0566	9.11376	16.9705	21.0559	10.0566	34.8837	14.142	17.9133	14.7706	19.7989	49.0258	60.6537	23.5701	32.3696	18.5418	42.1119	43.369	76.9956	42.7404	35.8265	34.8837	39.5977	43.9975	17.9133
5730435O14Rik	1000	0	3.24149	0	0	0	0	4.86224	1.62075	0	1.62075	0	0	0	0	0	0	0	0	1.62075	4.86224	3.24149	0	0	0	11.3452	1.62075	0	0	0	1.62075
Cep57l1	1000	109.761	112.275	114.37	121.91	83.7872	100.964	68.2866	85.8819	92.5848	87.5576	95.9363	111.437	111.437	99.7067	104.315	141.6	132.803	152.493	121.91	147.047	128.194	131.546	149.979	153.331	142.019	124.424	134.897	165.48	143.695	134.897
Sesn1	1000	985.325	857.442	1140.16	1034.44	812.219	826.295	735.849	652.591	884.097	819.407	1055.71	1067.39	1401.62	1007.49	1009.88	836.777	847.559	926.924	767.895	799.641	689.727	873.315	855.945	926.625	1052.11	793.052	907.457	950.584	976.34	880.204
Armc2	1000	65.9815	60.6372	78.9311	74.6146	67.4203	72.3535	76.8756	72.5591	69.6814	65.776	63.5149	82.0144	69.2703	70.5036	57.7595	63.1038	88.7975	119.424	69.0647	85.9198	62.4872	70.0925	86.5365	125.591	105.036	85.0976	93.1141	89.6197	86.9476	74.409
Foxo3	1000	397.715	335.756	497.75	472.828	317.065	349.602	526.826	433.714	396.677	344.064	371.409	457.598	553.133	460.713	395.985	681.205	726.895	810.315	692.627	632.745	525.787	807.2	691.589	714.78	768.086	648.321	631.706	614.399	766.009	671.859
Lace1	1000	363.709	364.903	383.207	383.207	333.864	329.885	326.303	268.603	321.13	331.476	320.732	329.089	370.474	332.272	323.518	341.425	339.435	348.587	303.223	315.559	324.314	354.954	360.923	375.249	413.052	326.701	316.355	302.427	319.538	349.383
Snx3	1000	4243.28	4555.56	4660.86	4379.08	4055.92	3879.45	3811.91	3350.04	3755.27	3901.96	4079.88	4005.08	4872.91	4326.07	3949.16	5250.54	4559.91	5543.94	5098.77	4971.68	4512.71	5407.41	5273.78	5424.11	5746.55	4535.95	4882.35	4949.16	4997.82	5070.44
Nr2e1	1000	236.622	270.646	268.172	253.634	214.352	205.073	263.842	228.89	224.25	242.499	254.253	231.673	299.722	269.719	226.415	291.37	355.707	382.926	287.349	336.839	216.517	308.692	348.593	336.53	357.563	293.535	352.614	343.334	364.058	325.085
Ostm1	1000	1129.28	1186.44	1234.3	1204.05	1108.34	1020.6	957.129	894.649	1072.12	1003.32	1061.15	1054.84	1274.84	1255.57	1134.93	1044.87	919.242	1153.21	1049.19	1070.12	1004.32	1120.64	1116.65	1149.22	1171.15	932.203	916.251	904.287	953.805	1084.08
Sec63	1000	738.893	772.215	800.564	830.405	736.406	703.084	705.239	640.915	695.955	660.477	694.297	736.572	872.347	844.662	701.426	808.687	734.085	950.928	768.07	795.922	746.519	863.893	876.658	909.151	970.822	776.028	797.248	770.06	793.269	829.576
Scml4	1000	46.7861	35.4057	41.3066	39.4099	42.1496	42.5711	23.1823	28.0295	43.2034	34.9842	13.0664	29.5047	32.4552	22.9715	18.7566	10.9589	21.2856	10.1159	14.3309	18.5458	8.21918	18.1243	17.2813	19.8103	17.4921	8.21918	15.8061	14.9631	14.5416	11.8019
Sobp	1000	1146.99	1068.88	1240.36	1158.23	1126.71	1037.95	1048.59	980.924	1007.43	962.249	977.51	1013.25	1350.6	1044.18	932.932	272.49	234.94	265.261	392.972	251.606	403.213	329.518	241.365	437.751	518.675	302.209	328.916	187.751	216.265	524.9
9030612E09Rik	1000	30.5303	23.0316	31.6015	30.5303	27.8522	19.2823	47.1344	41.2426	25.7097	29.459	32.1371	29.9946	34.8152	35.8864	22.496	8.5699	9.64114	10.1768	18.211	12.3192	18.7467	13.9261	10.7124	22.496	19.8179	17.1398	10.1768	9.64114	12.3192	26.2453
Pdss2	1000	276.219	271.295	261.448	271.295	279.173	236.829	232.398	213.688	228.459	262.432	249.631	223.043	266.371	255.047	231.905	192.516	187.592	206.302	181.684	193.993	187.592	218.119	188.085	236.829	256.032	158.05	166.913	134.909	180.699	245.199
Bend3	1000	83.9808	78.1947	80.3439	92.7426	90.5935	86.2953	72.574	60.3406	68.937	69.7636	61.8284	71.0861	77.0375	80.0132	74.0618	46.454	38.1881	50.0909	50.2562	56.373	50.4216	57.5302	47.4459	56.0423	64.3082	33.2286	30.2529	31.5755	40.0066	40.9985
1700021F05Rik	1000	782.851	825.167	824.053	891.982	815.145	732.739	840.757	661.47	807.35	772.829	830.735	724.944	832.962	810.69	712.695	744.989	661.47	757.238	689.31	834.076	682.628	868.597	806.236	769.488	912.027	674.833	688.196	685.969	694.878	811.804
Cd24a	1000	203.194	254.956	130.507	136.013	217.511	216.41	101.872	130.507	219.714	193.282	96.9163	211.454	139.868	174.009	131.057	333.15	712.004	437.775	351.872	552.863	289.097	672.357	403.084	634.361	618.943	263.216	623.348	596.916	631.057	313.877
F830002L21Rik	1000	0	0	0	0	0	0	0	0	0	0	0	0	0	0	0	0	2.18341	0	0	0	0	0	0	0	0	0	0	0	0	0
1700027J07Rik	1000	0	0	0	0	0	0	0	0	0	1.88679	0	0	0	0	0	0	0	0	0.943396	0	0	0.943396	0	0	1.88679	0	0	0.943396	0.943396	0
4933404K13Rik	1000	0	0	1.20337	0	0	0	0	0	1.20337	3.61011	1.20337	1.20337	0	0	0	1.20337	6.01685	3.61011	2.40674	1.20337	0	0	3.61011	0	0	0	0	0	2.40674	0
Qrsl1	1000	328.934	360.914	372.589	371.066	367.513	296.954	317.259	286.802	330.457	313.706	319.797	308.122	357.36	334.518	306.091	380.203	351.777	396.954	374.619	337.056	322.843	431.472	398.985	379.188	396.954	307.107	294.416	289.848	315.228	345.685
Rtn4ip1	1000	273.063	274.069	248.91	277.424	258.303	226.434	212.009	176.786	240.859	233.479	207.648	207.648	249.916	236.162	217.377	296.209	262.999	332.439	268.366	290.171	255.283	358.604	284.468	329.42	324.052	272.056	256.29	243.878	235.827	249.581
Aim1	1000	5.66343	12.1359	13.2147	14.4283	8.89968	9.57389	7.68608	8.09061	11.4617	7.55124	4.98921	8.76483	4.31499	9.03452	7.14671	4.71953	7.01187	19.9569	4.98921	8.49515	5.79827	12.2708	9.30421	14.698	7.55124	16.4509	9.30421	7.01187	8.09061	9.16936
Speer5-ps1	1000	0.65703	1.31406	0.65703	0.65703	0	0	0.65703	0	0	0	0	0.65703	0	0	0	0.65703	0	0	0	0	0	0	0	0	0	0	0	0	0	0
Atg5	1000	472.364	458.759	497.874	489.371	413.69	394.983	412.415	379.677	448.554	417.517	434.524	444.303	508.503	441.327	444.303	500.425	409.864	496.599	440.051	488.095	398.81	544.643	495.748	497.874	545.068	421.769	452.381	428.571	474.915	485.969
Mir1929	1000	0	10.7527	43.0108	10.7527	10.7527	21.5054	32.2581	21.5054	32.2581	43.0108	32.2581	10.7527	43.0108	32.2581	43.0108	10.7527	10.7527	53.7634	10.7527	21.5054	0	10.7527	10.7527	0	0	75.2688	10.7527	53.7634	0	21.5054
Prdm1	1000	6.7243	7.4928	7.4928	10.1825	6.91643	8.45341	10.1825	7.4928	6.7243	5.37944	5.95581	7.10855	7.10855	5.57157	5.18732	8.26129	6.53218	8.83766	7.10855	6.34006	8.45341	5.37944	8.26129	7.87704	10.5668	6.34006	6.91643	5.37944	7.30067	9.60615
Prep	1000	441.339	371.828	440.971	451.637	417.065	381.758	334.682	347.186	386.171	352.703	351.968	375.138	465.612	397.94	362.266	487.312	418.168	525.193	464.509	447.591	389.481	601.324	478.117	493.196	517.47	431.776	434.351	420.375	471.129	439.5
Popdc3	1000	127.499	109.13	106.429	91.8422	122.096	100.486	9.72447	8.10373	97.2447	111.831	79.4165	99.946	81.0373	83.1983	48.0821	29.1734	21.6099	30.2539	24.8514	31.3344	25.9319	24.3112	39.9784	24.8514	24.3112	34.5759	34.5759	36.1967	38.8979	29.1734
Bves	1000	82.1406	87.7411	94.5862	77.7847	72.8065	75.2956	14.9347	23.6465	72.8065	66.5837	70.9396	87.1189	101.431	72.1842	67.206	90.8525	103.92	91.4748	75.9179	97.0753	62.85	78.407	72.8065	82.1406	75.2956	79.0292	100.187	85.252	90.2302	72.1842
Lin28b	1000	40.1629	54.4142	63.4833	58.8562	47.9363	38.4971	75.5136	86.6185	39.9778	46.4557	26.4668	24.9861	30.5386	31.0938	32.5745	101.61	115.491	125.301	106.607	123.265	109.384	119.748	111.79	125.671	146.955	80.5108	79.9556	100.315	91.6158	84.5826
Hace1	1000	785.733	573.316	747.952	760.37	648.085	593.923	655.218	617.701	600.264	515.984	643.593	661.559	864.465	657.86	605.548	727.609	713.871	746.631	687.186	710.172	557.464	733.157	717.834	712.021	815.852	596.83	741.876	709.908	705.945	787.847
D030045P18Rik	1000	3.69979	5.81395	3.17125	3.17125	3.69979	8.45666	1.58562	0	3.17125	1.58562	2.64271	3.69979	3.69979	3.17125	5.28541	0.528541	1.58562	1.05708	0.528541	0	1.58562	0	0.528541	0	0	2.11416	1.05708	1.58562	0	0.528541
Snord14d	1000	0	0	0	0	0	0	0	0	0	0	0	0	0	0	0	0	0	0	0	0	0	0	0	0	0	0	0	0	0	0
Snord14c	1000	0	0	0	0	0	0	0	0	0	0	0	0	0	0	0	0	0	0	0	0	0	0	0	0	0	0	0	0	0	0
C130030K03Rik	1000	342.58	252.89	295.423	328.248	299.122	246.417	251.04	251.965	250.578	259.824	332.409	299.584	355.062	277.855	276.468	263.523	202.497	226.075	207.582	235.321	197.411	219.602	199.26	239.945	303.282	254.276	273.694	334.72	315.303	283.403
Grik2	1000	868.021	576.765	770.32	819.171	672.619	682.471	464.491	473.727	672.414	544.951	720.649	746.921	885.468	650.452	599.548	1154.97	1077.18	1016.01	861.248	1041.87	691.502	980.706	998.153	938.424	1020.11	1211.21	1475.57	1440.68	1482.96	1069.99
Ascc3	1000	184.566	151.799	184.566	190.986	156.079	157.684	125.719	121.573	152.2	136.017	143.106	152.601	181.624	163.97	132.674	232.446	209.71	267.888	207.57	234.854	171.058	225.625	233.784	250.234	239.936	205.697	206.5	190.718	195.265	183.63
Sim1	1000	0	0	0	0.135962	0	0	0	0.271924	0	0	0	0	0	0	0	0	0	0	0	0	0.407886	0.407886	0	0	0.135962	0.135962	0	0.407886	0	0
Lilr4b	1000	4.70746	0.672495	2.01748	4.70746	4.70746	2.01748	4.70746	1.34499	3.36247	4.70746	0	2.01748	6.05245	0.672495	4.03497	0.672495	1.34499	2.68998	0.672495	2.01748	5.37996	6.05245	6.05245	3.36247	6.72495	5.37996	4.03497	1.34499	4.70746	5.37996
Lilrb4a	1000	9.33333	2.66667	9.33333	9.33333	4	12	12	15.3333	7.33333	12	12.6667	4.66667	8	3.33333	7.33333	10	8.66667	16.6667	6	9.33333	13.3333	10	17.3333	16	31.3333	18.6667	9.33333	10	7.33333	5.33333
Fam162b	1000	0	0	0	0	0	0	0	0	0	0	0	0	0	0	0	0	0	0	0	0	0	0	0	0	0	0	0	0	0	0
Gprc6a	1000	0	0	0	0	0	0	0	0	0.35014	0	0	0	0	0	0	0	0	0	0	0	0	0.70028	0	0.35014	0	0	0	0	0	0
Rfx6	1000	0	0	0	0	0	0	0	0	0	0	0	0	0	0	0	1.89138	0.270197	1.08079	1.62118	1.08079	1.62118	1.35099	0.540394	1.08079	0.540394	0.270197	0	0.540394	0.810592	0.270197
4933411G06Rik	1000	0	0	0	0	0	0	0	0	0	0	0	0	0	0	0	0	0	0	0	0	0	0	0	0	0	0	0	0	0	0
Vgll2	1000	1.21212	3.63636	2.42424	3.63636	1.81818	4.24242	5.45455	1.21212	4.24242	6.06061	3.0303	2.42424	3.0303	1.81818	4.84848	7.87879	8.48485	10.303	14.5455	9.69697	5.45455	13.3333	6.06061	11.5152	4.24242	3.0303	1.21212	0	0	5.45455
Ros1	1000	0	0	0	0	0	0	0	0	0	0	0	0	0	0	0	0	0	0	0	0	0	0	0	0	0	0	0	0	0	0
Dcbld1	1000	200.331	220.496	242.975	236.364	203.636	198.678	150.083	142.149	202.314	192.066	177.19	183.471	234.711	199.669	206.281	286.612	273.719	310.744	264.132	290.579	200.331	294.215	283.967	284.298	279.339	163.306	246.612	246.612	241.322	253.223
Gopc	1000	681.26	618.717	716.701	705.119	629.141	594.626	574.936	573.546	605.745	565.671	567.755	605.513	765.578	665.972	590.688	706.972	595.784	719.018	683.577	709.521	595.784	762.335	706.741	732.916	821.172	576.558	654.158	633.079	615.705	682.882
Nepn	1000	0.548546	1.09709	0.548546	0.548546	0.548546	1.64564	0.548546	0.548546	1.09709	0	0	2.19419	1.64564	0.548546	0	1.09709	0	0	0	1.09709	1.09709	0	0	0.548546	0.548546	0.548546	0.548546	0.548546	0.548546	0.548546
Nus1	1000	944.3	961.638	972.042	1028.61	894.885	890.984	928.912	832.9	876.246	863.893	913.958	885.349	1013.22	990.03	808.192	1275.68	1129.17	1312.53	1155.4	1206.33	960.338	1278.93	1247.51	1268.53	1337.88	1203.51	1406.81	1281.97	1329.65	1286.3
Zfa-ps	1000	0.292398	0	0.584795	0	0.292398	0	0	0	0	0	0	0	0	0.292398	0.292398	0	0.292398	0.292398	0	0	0.584795	0	0	0.584795	0	0	0.292398	0.292398	0.584795	0.292398
Slc35f1	1000	384.074	534.888	443.595	465.112	481.4	388.9	755.882	793.887	483.41	410.416	396.139	373.819	437.764	496.28	366.378	1111	972.451	1025.34	980.092	1039.61	835.713	1106.58	977.881	997.788	1131.51	880.756	1020.71	1002.82	1036.8	1023.12
Cep85l	1000	173.541	154.589	184.69	204.013	153.103	157.191	114.827	108.138	152.731	133.408	133.036	161.278	202.155	159.792	128.205	169.454	141.211	141.583	134.151	145.671	121.888	176.514	160.164	133.408	169.825	134.522	134.522	131.178	153.475	143.813
Gm19395	1000	0	0	0	0	0	0	0	0	0	0	0	0	0	0	0	0	0	0	0	0	0	0	0	0	0	1.51976	0	0	0	0
Pln	1000	20.5645	14.5161	9.67742	26.6129	12.5	8.46774	20.1613	29.4355	6.85484	12.5	4.03226	4.43548	32.2581	16.5323	5.24194	45.1613	6.85484	16.129	19.3548	14.1129	29.0323	57.2581	30.6452	22.1774	18.1452	37.5	9.67742	4.43548	30.2419	20.1613
Gm20597	1000	4.37477	5.1039	4.01021	4.92162	3.28108	2.18739	3.28108	4.19249	3.64564	2.36967	1.64054	2.91651	4.01021	5.46847	3.46336	5.83303	4.92162	4.19249	4.37477	5.83303	4.37477	8.93183	6.01531	4.37477	8.2027	2.55195	5.1039	6.56216	7.83813	3.64564
Mcm9	1000	64.033	49.8322	75.6519	66.8732	55.7707	62.4839	53.9633	46.2174	60.6765	51.6396	42.8608	53.1887	54.9961	42.0862	47.5084	108.701	77.2011	102.246	67.6478	91.402	72.0372	91.6602	90.111	78.7503	101.214	69.4552	64.8076	80.8159	83.1397	71.779
Asf1a	1000	195.692	214.94	244.271	245.188	209.899	206.691	186.526	164.07	200.275	208.983	187.901	211.274	239.23	200.275	179.193	297.434	269.019	322.181	274.977	310.266	225.481	351.971	303.85	302.016	330.889	248.396	260.77	269.478	283.685	261.228
Fam184a	1000	318.228	265.316	310.127	339.494	273.418	274.684	278.987	261.519	271.139	256.962	237.215	260.506	331.139	267.848	230.633	549.114	520.506	591.139	478.481	556.203	390.633	534.937	572.911	526.076	567.089	476.203	557.215	561.013	570.633	421.013
Man1a	1000	579.841	905.888	781.435	762.15	816.92	639.753	393.16	326.562	681.923	611.983	613.268	546.156	1026.23	920.802	850.347	976.858	974.286	1021.09	610.183	899.974	356.39	815.377	854.976	818.205	566.212	769.864	781.949	805.348	792.492	585.755
Gm16998	1000	17.0732	21.9512	14.6341	13.0081	15.4472	13.0081	17.0732	24.3902	17.0732	15.4472	8.94309	13.8211	13.8211	15.4472	15.4472	47.9675	42.2764	48.7805	26.0163	39.0244	17.0732	26.8293	36.5854	34.1463	34.1463	30.0813	43.0894	52.8455	32.5203	25.2033
Tbc1d32	1000	158.033	136.207	152.369	136.345	135.516	121.564	101.81	94.0738	115.762	115.762	113.552	133.72	139.66	130.819	104.572	131.51	135.792	156.651	119.906	137.864	93.5212	140.765	136.207	141.594	148.916	116.729	125.984	117.42	117.696	113.275
Msl3l2	1000	382.71	365.421	407.477	422.43	383.178	359.346	315.421	346.262	378.972	361.215	337.85	337.85	462.617	397.664	378.972	413.551	351.402	424.766	414.486	419.626	317.29	453.271	396.262	409.813	425.701	307.944	364.486	382.71	421.963	364.953
Gja1	1000	2723.35	2774.88	3142.03	3146.54	2550.08	2652.17	2489.53	2032.53	2633.49	2628.34	3191.3	2976.49	3910.79	3327.21	2821.26	2722.38	2424.8	2452.5	2482.13	2817.07	2292.75	3184.22	2523.99	2535.27	3312.4	2424.15	2751.37	3069.89	3382.61	2725.93
4930467K11Rik	1000	2.76625	11.065	5.5325	9.68188	1.38313	1.38313	0	2.76625	2.76625	5.5325	5.5325	0	2.76625	1.38313	1.38313	4.14938	4.14938	5.5325	4.14938	8.29876	1.38313	8.29876	9.68188	0	5.5325	5.5325	0	0	0	4.14938
Hsf2	1000	458.254	476.935	499.047	447.579	435.761	419.367	423.18	364.849	432.329	420.892	455.204	420.892	513.534	447.96	399.161	451.392	452.917	494.472	434.617	480.747	400.305	502.859	485.703	504.766	535.265	393.443	441.098	444.529	427.754	455.585
Serinc1	1000	17727.6	16748.8	17534.1	18153.6	17166.4	15480.5	15573.7	15156	16440.6	14836.3	15739.1	15391.9	18859.6	17140.4	15414.9	16771.4	14789.8	17195.6	16953.1	16636.2	15303.7	19011.1	17528.5	17307.2	19734.9	13294.3	14596.2	14186.9	13756.4	17142.8
Pkib	1000	87.7629	69.0512	84.2855	76.8339	77.6619	69.5479	69.7135	61.5996	63.5867	82.1328	69.5479	61.1028	77.993	59.4469	57.9566	32.1245	16.0623	22.6859	27.6536	26.9912	34.1116	53.9824	28.8127	30.7998	41.8944	27.3224	22.6859	25.5009	29.3095	36.7611
Fabp7	1000	1173.23	916.01	1148.29	1308.4	900.262	1234.91	757.218	804.462	1048.56	786.089	790.026	835.958	892.388	707.349	706.037	751.969	646.982	610.236	531.496	620.735	694.226	845.144	539.37	688.976	538.058	489.501	437.008	594.488	531.496	602.362
Smpdl3a	1000	609.157	627.024	715.801	699.609	616.974	794.528	654.941	555.556	610.832	552.205	605.248	595.198	764.936	641.541	609.157	737.018	720.268	1517.59	750.977	766.611	634.841	774.986	1315.47	1488.55	914.573	1242.32	797.32	819.654	851.48	819.654
Dux	1000	0	0	0.987654	0	0	0	0.493827	0.493827	0	0	0	0	0	0	0.987654	0	0	0	0	0	0	1.48148	0	0	0	0	0	0.493827	0	0
Gm4981	1000	1.65472	1.65472	2.20629	1.10314	1.10314	0.551572	0.551572	0.551572	0	0.551572	0	0.551572	0	1.10314	0	2.20629	1.10314	0.551572	3.861	0.551572	0	0	2.20629	0	1.10314	2.20629	0	0	0	0
Gcc2	1000	630.318	589.31	657.963	677.469	616.188	561.511	524.958	495.93	573.645	523.883	540.931	565.197	668.407	658.271	559.975	752.88	700.2	818.461	704.193	746.276	556.597	839.656	787.283	770.389	787.283	647.212	697.896	649.67	665.643	684.073
Lims1	1000	289.213	330.5	307.225	315.118	294.07	260.271	316.333	276.665	285.57	299.13	272.212	264.521	296.903	319.773	257.64	339.81	330.298	397.086	348.715	347.501	316.94	409.027	404.574	374.621	477.838	343.858	336.774	330.298	351.143	323.214
Ranbp2	1000	866.821	691.748	842.339	863.972	740.502	749.683	645.737	609.329	710.637	577.353	688.687	733.643	948.607	792.845	641.726	1024.59	1043.58	1162.09	911.566	1001.79	758.442	1108.59	1122.73	1056.88	1160.19	996.834	1140.35	1001.69	1036.62	962.642
Ccdc138	1000	64.8824	71.7762	67.3155	77.4534	70.1541	69.7486	64.4769	57.5831	64.0714	66.91	60.4217	58.3942	70.1541	61.6383	50.2839	82.7251	93.2685	97.3236	83.5361	96.1071	66.5045	82.7251	99.3512	94.8905	100.162	62.0438	53.9335	62.8548	69.3431	49.4728
Edar	1000	1.90217	4.34783	1.08696	1.08696	3.26087	4.34783	2.71739	4.34783	1.3587	1.3587	1.63043	1.63043	0.815217	2.71739	1.90217	12.2283	22.2826	28.2609	10.8696	19.2935	8.42391	15.4891	19.2935	22.2826	15.7609	16.3043	16.8478	17.663	8.15217	10.5978
BB019430	1000	0	0	0	0	0	0	0	0	0.757576	0	0	0	0	0	0	0	0	0	0	0	0	0	0	0	0	0	0	0	0	0
Sh3rf3	1000	283.861	254.8	282.996	261.719	234.561	258.26	279.536	303.754	252.378	208.96	232.659	270.368	280.055	249.092	192.527	244.594	255.838	249.438	239.405	267.082	248.573	241.654	244.594	276.596	333.679	271.579	326.587	201.522	243.729	354.264
2010-09-01	1000	104.748	100.603	99.8493	113.037	99.4725	133.384	91.9367	71.9668	75.358	101.356	76.4883	87.792	90.4295	95.7046	75.358	128.109	131.5	338.357	133.007	152.223	109.269	139.789	214.017	252.072	183.12	214.017	109.269	138.659	145.064	111.153
Sowahc	1000	142.952	132.535	136.303	156.693	128.103	258.644	112.367	115.47	123.449	113.254	109.707	142.066	127.438	141.179	101.729	175.532	139.406	462.101	161.126	184.619	158.466	193.927	346.853	475.177	202.571	444.371	135.195	150.266	169.77	135.417
P4ha1	1000	602.276	628.988	668.81	673.757	549.345	613.653	500.371	470.69	563.938	528.568	670.542	726.193	744.249	699.481	603.018	570.863	549.839	760.326	562.948	566.411	480.831	632.698	681.919	747.465	707.643	895.622	931.734	765.768	774.425	757.853
Pla2g12b	1000	0	2.81426	32.833	0	2.81426	0.938086	0	0	44.0901	10.3189	0.938086	1.87617	18.7617	0	10.3189	0	0	10.3189	0	0	0	0.938086	0	1.87617	2.81426	4.69043	0	0	0	0
Oit3	1000	2.20913	1.47275	12.5184	1.10457	0.736377	1.47275	0.736377	1.84094	5.52283	2.94551	2.94551	1.84094	5.52283	2.94551	5.52283	4.05007	5.15464	5.89102	2.20913	1.47275	1.10457	4.05007	3.3137	5.89102	4.78645	1.47275	1.84094	4.05007	3.3137	2.20913
Mcu	1000	890.32	725.627	829.039	892.409	745.822	683.496	498.607	493.384	742.34	682.799	679.666	709.958	810.585	693.593	626.045	656.337	583.565	662.604	605.501	601.323	522.284	752.437	718.315	683.148	701.253	485.028	605.153	511.142	533.426	566.504
Micu1	1000	1643.52	1629.63	1826.6	1751.26	1578.28	1524.41	1514.31	1317.76	1590.91	1549.24	1498.74	1534.51	1742	1595.54	1463.8	2515.99	2276.94	2763.05	2381.73	2402.78	2109.85	2795.88	2661.2	2550.51	2655.72	2184.34	2171.3	2265.57	2335.02	2178.45
Dnajb12	1000	978.016	1018.6	1065.39	1005.64	1039.46	894.589	823.563	817.362	848.365	859.639	844.419	901.917	1119.5	1071.03	896.843	1201.24	1083.43	1319.05	1065.95	1129.09	981.398	1220.41	1278.47	1236.19	1303.27	1090.76	1026.49	1105.98	1221.53	1111.61
Ddit4	1000	1351.93	1442.14	1610.68	1329.97	1200.59	1324.63	749.555	600.593	1212.46	1124.04	1430.27	1432.64	1736.5	1623.15	1357.27	1181.01	1021.36	1338.28	1059.94	1143.62	1077.74	1361.42	1036.8	1207.72	1216.02	1209.5	1210.68	1248.66	1400.59	1122.26
Anapc16	1000	1564.33	1637.32	1670.43	1574.12	1519.94	1405.57	1340.86	1245.3	1390.52	1468.02	1576.37	1541.76	1921.75	1691.5	1510.16	1798.34	1684.73	1969.9	1753.2	1753.2	1598.19	1969.9	1750.94	1877.35	2092.55	1658.39	1828.44	1847.25	1988.71	1845.75
Ascc1	1000	407.478	440.431	423.321	395.437	401.141	408.112	331.432	325.729	384.664	406.844	384.03	435.995	467.047	388.466	383.397	480.989	516.477	666.033	514.575	556.401	431.559	614.702	546.895	653.992	589.354	520.913	518.378	569.075	615.336	548.796
Spock2	1000	7981.35	7317.24	7617.37	7957.85	7574.2	7079.44	7500.64	6964.75	7134.87	7206.9	5310.09	6580.08	7250.83	7262.58	5700.64	7844.44	7134.1	7529.5	7320.05	7218.9	6673.82	9900.13	7427.59	8073.56	9046.74	6907.79	7908.56	6624.27	7661.81	8063.35
Mir6906	1000	68.9655	86.2069	17.2414	34.4828	86.2069	34.4828	34.4828	17.2414	68.9655	0	51.7241	68.9655	137.931	34.4828	34.4828	34.4828	17.2414	0	17.2414	0	0	34.4828	17.2414	17.2414	17.2414	103.448	17.2414	68.9655	17.2414	68.9655
Chst3	1000	25.6872	48.2657	31.0864	32.2317	28.6322	24.5419	26.9961	25.6872	26.6688	31.9045	26.3416	26.5052	23.8874	43.5209	26.8325	52.6832	45.9751	54.3194	35.9948	58.2461	53.6649	61.3547	47.6113	47.4476	57.1008	46.466	41.394	45.6479	44.1754	40.9031
Psap	1000	23943.7	23755.2	25788.5	24557.6	23109	23517	26551.8	23615.1	22438	23482.6	22499.8	23123.3	27680.6	25118.9	22103.2	27896.5	25796.2	39159.9	27674	26867.2	25404.7	31928.6	32327.1	37305.2	33514.8	30865.7	25921.7	24962.3	27022	28794.7
Cdh23	1000	12.5278	13.6828	13.3274	9.50689	6.8414	11.0173	6.21946	4.79787	9.50689	9.41804	10.7508	15.3709	16.9702	17.0591	11.7281	4.44247	5.41981	3.64283	3.64283	3.64283	4.08707	5.77521	3.99822	4.62017	6.30831	4.26477	5.59751	5.15327	7.5522	5.68636
4632428N05Rik	1000	249.071	289.311	316.55	297.359	244.532	263.31	269.913	238.341	264.754	263.929	241.024	285.596	281.469	301.898	248.865	343.789	284.152	335.741	285.596	340.281	300.66	360.71	340.693	315.105	393.727	336.566	341.725	288.898	355.757	349.567
Gm17455	1000	18.6698	14.0023	8.16803	11.6686	22.1704	3.50058	8.16803	8.16803	14.0023	33.839	11.6686	19.8366	25.6709	18.6698	7.00117	16.3361	52.5088	39.6733	43.1739	59.5099	17.5029	61.8436	49.0082	49.0082	64.1774	25.6709	50.175	54.8425	67.6779	37.3396
Slc29a3	1000	158.969	180.153	145.42	148.664	139.313	128.626	128.435	118.702	153.244	149.237	131.489	158.588	167.176	181.489	143.511	196.565	179.58	208.015	166.985	194.466	177.863	223.855	199.618	202.29	258.397	175.954	172.901	193.321	203.053	192.557
Unc5b	1000	214.079	490.711	226.521	240.157	340.208	196.012	291.972	227.885	257.201	350.435	297.767	374.979	268.28	563.32	351.457	575.251	445.543	579.172	504.346	552.923	586.842	597.068	502.131	525.652	810.636	661.326	517.641	686.893	772.627	548.492
Mir6408	1000	0	0	0	0	0	0	0	0	0	0	0	0	0	0	0	0	0	0	0	0	0	0	0	0	0	0	0	0	0	0
Pldi	1000	0	0	0	0	1.17233	0	0	0	0	0	0	0	0	0	0	0	0	0	0	0	0	0	0	0	0	0	2.34467	0	0	0
Mir466j	1000	0	0	0	0	0	0	0	0	0	0	0	0	0	0	0	0	0	0	0	0	0	0	8.19672	8.19672	0	8.19672	0	8.19672	0	0
Gm20611	1000	0	0	0.884173	0	0	0	0.884173	0	0	2.65252	0.884173	0	0	0	0	2.65252	0	0	1.76835	4.42087	1.76835	0.884173	0	0.884173	0	0.884173	0.884173	4.42087	2.65252	7.07339
Pcbd1	1000	154.501	177.616	436.74	145.985	173.966	173.966	139.903	149.635	381.995	186.131	125.304	178.832	425.791	180.049	263.99	188.564	143.552	255.474	125.304	160.584	142.336	282.238	178.832	183.698	166.667	182.482	172.749	150.852	190.998	176.399
Sgpl1	1000	451.128	500.364	513.946	484.599	438.273	420.325	493.815	466.65	453.796	462.77	461.315	451.37	499.394	500.364	454.766	466.408	447.975	596.41	430.269	475.867	449.673	537.715	533.107	569.731	596.895	454.281	451.855	433.907	449.915	471.744
Tbata	1000	332.18	385.566	392.486	339.595	323.282	330.203	69.6985	83.5393	306.97	299.061	289.669	291.646	379.14	335.146	287.692	2.96589	15.8181	5.93178	34.6021	6.4261	37.568	9.39199	3.95452	25.7044	49.9259	12.8522	21.2556	11.8636	10.3806	45.9713
Adamts14	1000	19.468	14.6492	15.8057	14.6492	13.4927	12.1434	3.6623	6.74634	15.0347	19.468	9.25212	13.6854	4.24056	10.6014	8.28836	1.54202	0.77101	1.54202	1.54202	1.34927	3.08404	3.46955	1.73477	2.31303	1.15652	0.963763	2.12028	0.385505	3.46955	1.54202
Prf1	1000	0	0	0.97371	0	0	0	0	0	0	0	0	0.97371	0	0	0	0	0	0	0.486855	0	0	0	0	0	0	0.486855	0.486855	0	0	0
Pald1	1000	200.281	193.262	246.373	230.931	183.669	194.431	144.595	128.451	198.175	181.563	166.121	215.021	211.277	178.755	154.422	131.259	128.451	151.614	116.285	147.169	130.323	158.634	151.848	147.169	185.307	138.278	139.448	115.817	139.214	128.919
Nodal	1000	8.59599	14.8042	12.894	19.1022	5.73066	9.07354	21.49	11.4613	20.0573	12.894	17.6695	13.3715	19.1022	12.4164	10.9838	17.192	13.8491	19.5798	20.5349	12.4164	18.6246	24.3553	16.2369	12.4164	17.192	10.9838	24.3553	18.1471	20.5349	17.6695
Eif4ebp2	1000	563.27	586.226	668.533	643.337	515.677	548.712	448.488	410.414	546.473	508.959	483.203	589.026	690.929	611.422	465.286	585.666	692.049	742.441	565.51	544.233	512.878	691.489	655.095	646.697	689.81	645.577	634.938	493.841	617.021	536.394
Lrrc20	1000	584.51	591.759	636.78	635.254	550.553	507.821	436.856	386.112	542.159	523.846	612.743	626.478	781.381	729.874	701.259	533.003	473.865	539.87	483.785	521.557	480.351	602.442	546.356	584.128	604.731	556.658	532.24	534.529	568.867	600.534
Npffr1	1000	32.1347	19.1278	19.8929	32.1347	35.1951	17.5976	3.06044	8.41622	29.8393	16.8324	13.0069	34.43	31.3695	45.1415	19.1278	7.65111	6.12089	3.82555	6.886	3.06044	9.94644	9.94644	4.59067	22.1882	6.12089	13.0069	2.29533	7.65111	3.82555	14.5371
Ppa1	1000	1937.31	2050.31	2229.1	2113	1928.79	1811.92	2030.96	1791.8	1983.75	1838.24	1930.34	1923.37	2320.43	2037.15	1952.01	2167.18	1850.62	2079.72	1957.43	2059.6	1755.42	2459.75	2082.04	2318.11	2333.59	1990.71	2075.08	1901.7	2056.5	2484.52
1700022H01Rik	1000	2.92398	0	1.46199	4.38596	2.92398	1.46199	1.46199	0	1.46199	0	0	0	10.2339	0	0	4.38596	0	5.84795	2.92398	1.46199	4.38596	4.38596	4.38596	4.38596	5.84795	0	7.30994	2.92398	4.38596	2.92398
Sar1a	1000	2157.57	2187.55	2340.89	2327.82	2108.76	2049.96	2089.55	1975.02	2094.93	2056.5	2087.24	2083.4	2404.69	2315.53	1990.78	2393.54	2190.24	2488.85	2340.51	2348.96	2041.89	2637.2	2451.19	2578.79	2698.31	2131.82	2115.3	2169.49	2161.03	2387.01
Tysnd1	1000	339.458	366.579	402.45	382.327	348.206	361.767	384.952	303.15	349.956	370.516	379.265	374.453	447.069	414.698	373.578	345.582	346.457	375.328	345.144	336.833	322.397	422.135	360.017	397.2	411.636	344.269	343.395	357.393	405.949	405.949
Aifm2	1000	59.9942	101.529	90.5682	84.5111	98.9328	77.3003	116.239	112.778	85.3764	108.451	82.2036	86.8186	100.952	105.567	85.088	146.524	141.621	166.715	122.584	157.485	129.507	156.62	132.68	147.678	177.387	111.047	110.182	107.874	126.046	124.603
H2afy2	1000	272.775	335.079	332.984	328.272	275.916	282.199	420.419	390.576	323.037	313.089	263.874	251.832	291.099	308.377	237.173	549.738	545.55	547.12	535.602	556.021	478.534	621.99	516.23	596.335	635.079	424.084	487.435	523.56	536.649	510.995
Mir5108	1000	0	0	0	0	0	0	0	0	0	0	0	0	0	0	0	0	0	0	0	0	0	0	0	0	0	0	0	0	0	0
Col13a1	1000	19.5954	18.3312	34.134	47.7244	17.3831	24.3363	26.2326	19.9115	20.5436	26.8647	13.5904	18.3312	26.5487	14.8546	18.0152	8.5335	8.21745	15.1707	4.74083	6.00506	6.00506	11.378	15.4867	12.3262	9.16561	12.0101	10.1138	3.79267	7.26928	12.0101
2010107G23Rik	1000	447.718	509.532	586.944	541.883	439.63	461.583	599.653	584.055	536.106	477.181	481.802	458.117	558.637	452.917	432.12	461.005	460.427	482.38	477.181	469.093	456.961	523.975	435.586	558.059	590.41	398.036	428.654	441.363	474.292	577.123
Neurog3	1000	0.649351	0	0	0	0	0	1.2987	0.649351	0	0	1.2987	0	0	0	0	0	0	0.649351	0	0	0	0.649351	0	0	0.649351	0	0.649351	0	0	1.94805
Tspan15	1000	277.115	404.161	294.036	303.745	328.988	247.157	238.28	182.524	285.16	310.125	286.824	327.601	291.817	368.932	302.635	431.9	374.757	462.691	393.62	448.544	381.137	538.419	416.089	378.641	569.487	354.23	330.652	434.951	456.311	355.062
Mir7662	1000	49.1803	131.148	32.7869	32.7869	81.9672	180.328	32.7869	65.5738	16.3934	49.1803	16.3934	32.7869	49.1803	163.934	213.115	65.5738	32.7869	49.1803	49.1803	147.541	65.5738	49.1803	98.3607	196.721	131.148	65.5738	81.9672	32.7869	213.115	49.1803
Tacr2	1000	0.44287	2.65722	3.54296	2.65722	1.77148	3.54296	3.54296	2.65722	4.87157	4.4287	4.87157	0.88574	4.87157	1.77148	1.32861	2.21435	3.10009	2.21435	2.65722	4.87157	1.77148	4.87157	1.32861	3.54296	4.87157	2.21435	1.77148	0.44287	0.88574	1.32861
Hk1	1000	4541.14	4389.89	4903.53	4554.22	4410.07	4290.53	4710.8	4361.28	4289.42	4088.93	3963.18	3993.35	5168.33	4521.18	3944.78	2935.24	2846.97	3458.19	3362.16	2893.1	3151.47	3462.85	3211.8	3883.34	4087.82	2963.85	2851.85	2483.26	2758.26	3909.07
Hk1os	1000	39.4973	43.088	34.1113	43.088	32.316	37.702	26.93	21.544	23.3393	41.2926	32.316	26.93	37.702	21.544	23.3393	32.316	28.7253	39.4973	30.5206	50.2693	25.1346	41.2926	41.2926	66.4273	30.5206	32.316	21.544	39.4973	26.93	10.772
Hkdc1	1000	60.2929	91.0135	87.8553	78.6678	71.203	55.1249	265.001	252.369	69.4803	79.242	76.0838	76.9452	70.0546	79.8163	57.996	7.46483	16.3652	15.2168	31.582	16.9394	30.1464	16.9394	6.89061	43.0663	61.4413	20.3847	31.8691	18.6621	18.375	73.787
Supv3l1	1000	479.079	429.289	490.795	446.025	434.31	397.49	374.477	348.117	410.879	404.603	425.941	407.95	506.695	469.456	428.87	443.096	443.096	536.82	424.268	463.598	372.385	522.176	465.272	508.787	521.339	434.728	405.021	420.502	453.975	454.812
4930507D05Rik	1000	15.9526	18.2315	12.3063	11.8505	15.4968	13.2179	15.4968	12.3063	18.2315	7.7484	13.6737	9.57156	19.5989	15.4968	17.7758	14.5852	14.5852	15.041	11.8505	12.7621	10.9389	15.4968	12.7621	19.1431	15.4968	10.4831	10.0273	12.7621	14.1294	16.4084
Vps26a	1000	902.214	903.137	914.822	923.432	840.098	746.002	871.156	855.166	874.231	781.673	814.268	841.943	954.182	892.989	779.213	760.763	675.584	854.244	828.721	782.288	777.983	861.931	806.581	917.282	1055.35	718.327	766.913	712.485	711.562	915.437
Srgn	1000	163.113	227.079	236.674	268.657	157.783	198.294	281.45	183.369	190.832	197.228	211.087	151.386	226.013	208.955	170.576	198.294	207.889	244.136	204.691	196.162	211.087	201.493	206.823	231.343	335.821	266.525	296.375	214.286	226.013	265.458
Kif1bp	1000	4068.37	3730.58	4011.33	4048.95	3720.87	3442.56	3113.67	2852.35	3632.28	3420.71	3897.25	3965.61	4864.08	4233.82	3842.23	3120.55	2725.73	3180.42	3163.43	3115.7	2870.15	3518.2	3193.37	3250	3647.65	2586.17	2627.83	2809.06	2753.64	3179.61
Ddx21	1000	356.947	329.749	415.56	392.579	334.388	317.521	268.817	257.854	346.405	280.413	279.992	287.371	362.007	327.43	284.841	382.248	363.483	458.149	349.357	391.103	331.857	428.21	443.812	401.855	412.186	327.43	324.9	326.376	341.767	328.062
Ddx50	1000	1134.42	1112.49	1278.42	1286.8	1088.95	1058.64	1141.2	1013.16	1012.37	1042.28	1127.24	1134.02	1288.39	1163.54	1082.57	1136.02	1027.92	1278.02	1110.09	1106.1	988.831	1264.06	1156.36	1258.48	1355.8	1085.76	1145.99	1122.86	1150.78	1217.79
Stox1	1000	32.882	31.5925	36.1057	31.9149	30.303	32.2373	50.2901	58.0271	31.2701	25.1451	28.0464	26.4346	34.4939	27.4017	29.0135	45.7769	48.6783	45.1322	45.7769	49.9678	40.2966	50.6125	39.0071	49.323	62.5403	37.3952	71.5667	55.4481	56.7376	59.3166
Mir7215	1000	0	0	0	0	0	0	0	0	0	0	0	0	0	0	0	0	0	0	0	0	0	0	0	0	0	0	0	0	0	0
Ccar1	1000	664.136	654.757	769.317	764.85	618.356	607.637	518.535	487.718	606.297	573.247	609.87	629.969	723.314	641.581	507.369	727.11	729.343	799.241	712.595	725.1	583.966	792.541	740.732	744.305	830.951	580.616	700.983	610.764	610.54	617.463
Snord98	1000	392.857	392.857	500	214.286	571.429	250	250	71.4286	357.143	285.714	214.286	785.714	571.429	750	178.571	250	214.286	214.286	107.143	392.857	250	107.143	142.857	250	428.571	321.429	428.571	214.286	250	142.857
Tet1	1000	57.3782	63.8404	70.1605	59.1535	53.6856	47.9335	45.2351	44.3119	53.3305	45.7321	52.8334	48.7857	54.9638	58.8695	50.9161	88.0557	98.2815	92.6005	80.1023	92.9555	72.2909	91.3223	82.8718	84.363	101.903	67.7461	83.1558	80.7414	91.6063	68.3852
Slc25a16	1000	771.729	691.5	795.925	808.341	770.455	681.63	650.43	591.531	673.034	617.319	633.238	638.968	842.407	728.43	688.953	701.687	639.924	831.264	701.687	755.492	599.172	724.928	787.966	806.749	835.721	592.805	626.234	650.111	650.748	697.23
Dna2	1000	28.8695	20.8637	26.4435	24.7453	21.1063	22.5619	23.2897	19.8933	23.5323	26.6861	23.5323	24.9879	23.7749	21.8341	19.1655	22.0767	28.3843	29.3547	19.8933	22.5619	19.4081	32.5085	29.8399	25.7157	29.3547	14.7986	23.7749	24.7453	24.0175	21.3489
Rufy2	1000	383.953	380.148	438.563	404.991	372.762	336.728	408.46	354.297	356.535	353.738	381.379	362.802	431.177	386.303	335.609	364.705	342.435	404.32	339.637	367.838	327.663	389.324	355.64	386.526	488.809	341.652	367.614	367.278	378.021	422.225
Hnrnph3	1000	1028.14	1205.72	1157.75	1192.34	1077.03	980.627	984.317	890.683	969.557	1142.99	1245.39	1129.15	1321.03	1376.85	1077.95	1226.48	1153.6	1306.27	1101.01	1241.7	999.539	1262.45	1065.5	1293.82	1573.34	1232.01	1363.47	1434.5	1532.75	1212.18
Pbld2	1000	26.2325	27.137	75.0791	23.9711	22.1619	22.1619	31.2076	25.7802	71.4609	34.3736	22.1619	32.1122	80.5066	19.4482	62.4152	19.9005	21.7096	25.7802	22.1619	20.8051	18.0914	26.2325	20.8051	29.8507	34.3736	22.6142	15.3777	25.3279	22.6142	22.1619
Pbld1	1000	2.57334	11.8374	85.4349	5.14668	4.63201	2.57334	4.11734	7.72002	106.022	18.528	5.14668	15.9547	82.3469	13.896	47.8641	2.05867	3.60268	23.6747	2.05867	9.77869	3.60268	6.69068	6.17602	10.808	11.3227	8.74936	3.08801	2.57334	8.23469	8.23469
Atoh7	1000	31.1111	26.6667	28.8889	35.5556	15.5556	26.6667	68.8889	26.6667	46.6667	20	40	28.8889	44.4444	31.1111	44.4444	31.1111	15.5556	20	35.5556	33.3333	37.7778	28.8889	42.2222	26.6667	33.3333	15.5556	33.3333	28.8889	44.4444	42.2222
Mypn	1000	6.67175	13.3435	13.1529	10.8654	10.1029	8.57796	35.4556	46.5116	9.14983	15.0591	8.76859	9.14983	9.34045	13.3435	9.14983	11.6279	11.2467	16.3934	21.7308	12.0091	31.8338	21.5402	8.76859	18.8715	45.9398	15.8216	14.4872	12.3904	18.109	37.9337
Herc4	1000	357.903	385.11	399.703	398.466	374.722	326.738	413.554	426.663	335.889	326.738	321.049	351.966	363.097	381.4	321.049	352.708	325.254	384.368	349.246	341.578	350.482	383.873	344.546	423.201	494.682	325.996	358.892	320.059	335.147	403.908
Sirt1	1000	236.317	242.455	265.217	236.061	217.136	219.693	220.46	180.051	214.578	211.253	236.829	231.714	252.43	249.105	221.995	251.918	261.637	298.977	213.811	263.939	236.573	278.261	263.427	279.284	336.317	247.57	290.537	247.826	271.611	261.381
Dnajc12	1000	245.421	298.901	341.392	331.136	339.927	282.051	343.59	298.901	292.308	287.912	290.11	257.143	306.96	341.392	254.212	467.399	424.908	506.227	438.828	463.736	375.824	507.692	464.469	487.179	482.784	365.568	368.498	334.799	392.674	389.011
Ctnna3	1000	14.2712	23.9551	18.8583	20.897	18.8583	9.684	16.8196	14.2712	15.8002	21.6616	12.9969	15.0357	12.2324	29.5617	15.2905	48.1651	53.7717	53.0071	48.1651	46.8909	44.8522	53.262	41.2844	47.4006	54.2813	39.2457	38.736	49.949	52.2426	38.9908
Lrrtm3	1000	172.118	220.924	174.195	207.425	190.55	161.994	549.585	502.336	205.348	193.666	224.559	182.243	223.261	229.751	167.445	1160.7	1108.77	1129.28	1043.09	1136.03	744.029	1086.45	1058.67	1122.79	1046.21	892.783	1163.03	943.406	1044.91	994.289
1700023F02Rik	1000	0	0	0	0	0	0	2.89855	17.3913	0	0	0	0	0	0	0	0	2.89855	0	8.69565	0	5.7971	0	2.89855	2.89855	2.89855	0	0	0	0	2.89855
4930407I19Rik	1000	0	0	0	0	0	0	0	0	0	0	0	0	0	0	0	0	0	0	0	0	0	0	0	0	0	0	0	0	0	0
Gm31763	1000	29.2683	29.2683	40	40.9756	25.3659	25.3659	36.0976	13.6585	28.2927	22.439	41.9512	40.9756	43.9024	25.3659	38.0488	40.9756	41.9512	42.9268	35.122	53.6585	35.122	60.4878	47.8049	37.0732	57.561	37.0732	42.9268	38.0488	78.0488	28.2927
Reep3	1000	396.757	574.234	450.991	475.676	482.342	352.613	430.991	381.441	400.721	454.955	408.468	479.82	452.793	580.721	398.018	665.946	551.892	710.27	563.964	679.099	590.991	716.396	649.73	604.685	878.559	577.477	563.423	642.162	685.766	534.955
Jmjd1c	1000	715.1	578.518	761.037	748.966	597.183	560.3	479.826	416.9	610.484	493.461	616.296	603.666	852.576	644.462	598.972	726.612	750.084	817.592	621.437	734.324	524.31	800.268	714.094	716.106	814.016	590.254	688.499	719.012	727.618	580.083
Nrbf2	1000	451.649	396.311	419.229	426.495	382.337	397.429	309.111	338.737	390.162	354.947	418.67	404.136	493.013	480.157	430.408	343.767	330.352	340.414	305.757	310.788	296.255	385.131	321.968	347.121	404.695	296.814	328.675	268.306	297.932	355.506
Egr2	1000	15.8516	13.828	9.78078	9.78078	13.4907	20.2361	45.5312	29.3423	8.76897	6.40809	24.2833	12.4789	28.3305	38.7858	12.1417	124.452	114.671	83.3052	27.9933	72.8499	55.9865	40.8094	35.7504	55.9865	36.7622	205.059	166.273	130.523	137.605	193.592
Ado	1000	649.269	947.582	736.783	742.182	773.903	577.278	774.578	645.219	658.268	739.708	670.866	733.633	746.682	898.313	733.633	1305.96	1077.84	1335.21	1181.55	1323.06	1171.43	1489.54	1336.78	1189.65	1508.66	1132.96	1103.26	1275.82	1301.91	1163.1
Zfp365	1000	3891	4006.34	4238.67	4428	3775.19	3625.09	7280.71	6129.9	3663.61	3917.55	3956.78	3751.47	4999.77	4288.94	3610.76	6029.36	5571.06	6307.02	6378.2	5884.43	5550.39	6020.91	6263.33	6142.82	7459.95	6317.36	6961.24	6285.18	6928.12	7745.83
Rtkn2	1000	38.1485	61.292	40.6918	33.5707	39.6745	32.5534	47.5585	46.7955	38.4028	42.7263	27.9756	42.2177	30.0102	59.766	37.1312	65.8698	56.7141	75.2798	60.2747	71.7192	61.5463	77.06	53.4079	65.8698	89.2675	50.3561	55.4425	73.7538	77.3143	59.766
Arid5b	1000	228.749	259.68	267.245	270.583	232.977	195.594	265.688	223.854	205.607	179.795	158.656	170.672	247.219	213.841	168.669	226.302	241.878	284.157	238.763	226.524	197.597	330.218	262.127	271.251	285.492	191.589	168.669	166.222	219.404	175.122
4930545H06Rik	1000	3.90117	0	0	2.60078	1.30039	2.60078	2.60078	0	0	3.90117	1.30039	1.30039	3.90117	2.60078	1.30039	2.60078	3.90117	6.50195	5.20156	5.20156	1.30039	0	2.60078	1.30039	7.80234	0	2.60078	10.4031	7.80234	6.50195
1700040L02Rik	1000	65.4281	61.3893	65.4281	34.7334	68.6591	84.0065	77.5444	63.8126	55.7351	67.8514	66.2359	88.853	60.5816	57.3506	56.5428	109.047	180.129	256.866	113.086	175.283	92.8918	172.052	217.286	243.942	169.628	143.78	181.745	179.321	182.553	119.548
Tmem26	1000	1.18765	1.58353	0.989707	0.395883	0.395883	0.791766	1.38559	1.18765	1.78147	0.593824	0.593824	0.791766	0.989707	0	0	1.38559	3.365	2.57324	2.3753	4.35471	0.791766	7.12589	1.97941	2.57324	2.77118	0.395883	0.791766	3.76089	1.18765	2.17736
Rhobtb1	1000	53.417	62.0675	61.6349	59.6886	56.2284	44.7664	72.4481	54.9308	42.6038	54.7145	49.0917	49.7405	67.474	49.308	47.3616	32.6557	31.7907	37.4135	33.3045	38.2785	34.6021	41.7388	38.9273	43.2526	49.308	42.6038	56.2284	39.7924	46.4965	52.3356
Cdk1	1000	2.7972	2.0979	1.3986	1.04895	2.7972	3.14685	2.7972	3.84615	1.3986	3.4965	3.14685	4.1958	2.7972	7.34266	4.1958	8.74126	22.028	19.5804	20.2797	21.3287	8.74126	18.5315	18.5315	25.5245	27.972	10.1399	18.1818	13.6364	21.6783	9.44056
Ank3	1000	1556.95	1569.3	1587.83	1655.69	1488.44	1331.21	1268.98	1077.96	1301.92	1304.73	1338.61	1398.13	1672.91	1542.72	1341.32	2084.32	1909.97	2012.17	1834.63	1977.63	1611.98	2157.7	1973.05	1874.12	2279.46	1764.72	1883.29	1953.86	1998.88	1783.81
Ccdc6	1000	526.946	546.18	598.439	595.355	492.651	489.385	429.686	412.085	531.482	494.647	528.216	560.515	681.183	585.738	505.534	546.906	513.337	587.008	496.825	487.752	399.927	594.992	534.93	615.678	586.282	498.458	563.6	568.136	582.29	512.067
Mrln	1000	4.4843	11.2108	6.72646	4.4843	4.4843	15.6951	11.2108	13.4529	13.4529	17.9372	13.4529	31.3901	15.6951	26.9058	15.6951	8.96861	22.4215	29.148	20.1794	24.6637	15.6951	22.4215	11.2108	17.9372	8.96861	20.1794	15.6951	29.148	24.6637	2.24215
Slc16a9	1000	29.1889	30.3115	30.5922	32.5568	28.0662	75.7788	39.2927	30.8729	29.1889	38.7314	26.9436	37.0474	34.8021	38.7314	19.3657	40.9767	45.1866	222.565	36.2054	33.9601	38.7314	43.7833	128.543	239.124	72.1302	207.971	51.9225	42.0994	47.4319	40.1347
Fam13c	1000	1533.05	1388.6	1592.31	1421.37	1399.15	1337.61	849.003	810.826	1324.79	1166.95	1403.42	1483.19	1833.33	1591.74	1364.67	780.057	821.652	841.311	709.972	758.974	656.41	873.219	768.376	872.65	1002.56	707.407	799.715	727.92	776.353	893.162
Phyhipl	1000	2752.82	2530.9	2877.74	2748.17	2506.64	2327.57	2756.81	2427.57	2449.17	2342.86	2344.52	2380.4	2787.04	2447.51	2134.88	2598.01	2188.04	2510.63	2776.74	2507.97	2680.07	2847.84	2427.24	2719.6	3372.09	2216.94	2448.84	2443.52	2409.63	2915.95
D630013N20Rik	1000	3.84246	4.80307	0.960615	2.88184	2.88184	5.28338	1.92123	0.480307	2.88184	1.92123	3.36215	3.84246	3.36215	2.88184	1.92123	3.36215	0.480307	4.80307	2.40154	3.84246	3.84246	2.40154	0.960615	2.88184	2.88184	0.960615	3.84246	1.92123	1.92123	3.36215
Bicc1	1000	76.1045	69.655	61.9155	88.3586	72.8797	75.1371	68.365	70.6224	61.593	74.4921	49.9839	69.9774	69.01	77.3944	51.9187	80.9416	92.2283	99.9678	73.2022	94.1632	63.5279	105.127	88.3586	93.5182	108.675	91.9058	83.199	93.1957	101.903	77.0719
C730027H18Rik	1000	0	1.30435	3.47826	0	0.434783	0	0	0	1.73913	0.434783	0.434783	0	5.65217	0.434783	3.91304	0	0.434783	0.434783	0	0.434783	0	0	0	0.869565	0.434783	1.30435	0	1.30435	0	0
1700113B09Rik	1000	2.32558	0	9.30233	2.32558	4.65116	11.6279	2.32558	0	6.97674	0	4.65116	4.65116	0	4.65116	2.32558	0	2.32558	0	0	0	4.65116	0	0	0	0	0	4.65116	2.32558	2.32558	0
Tfam	1000	402.757	428.28	464.267	472.435	427.514	405.054	369.832	339.459	385.401	385.911	409.137	394.079	487.494	419.602	387.443	434.15	389.484	427.004	389.995	425.217	360.133	460.949	423.941	431.087	497.703	397.397	397.397	398.928	427.004	427.514
Ube2d1	1000	1650.59	1846.96	1795.95	1707.2	1638.02	1373.17	1433.26	1308.87	1397.62	1489.87	1526.9	1519.22	1774.28	1800.14	1560.45	1875.61	1598.18	1865.83	1716.28	1858.14	1694.62	2081.76	1758.21	1826.69	2190.78	1638.71	1745.63	1865.83	2024.46	1742.14
Cisd1	1000	2484.97	2695.34	2776.17	2679.79	2338.86	2584.46	2547.15	2233.16	2486.01	2499.48	2668.39	2769.95	3112.95	2698.45	2524.35	2672.54	2327.46	3135.75	2634.2	2647.67	2438.34	3008.29	2732.64	3159.59	3103.63	2632.12	2647.67	2492.23	2529.53	3196.89
Ipmk	1000	406.683	454.126	471.663	434.742	383.607	381.946	268.968	243.862	403.36	364.408	427.174	467.048	560.089	439.911	423.482	303.674	306.073	337.825	280.783	303.674	272.291	344.84	282.629	329.334	358.686	274.322	311.796	286.875	315.119	328.041
1700049L16Rik	1000	0	0	0	0	0	0	0	0	0	0	0	0	0	0	0	0	0	0	0	0	0	0	0	0	0	0	0	0	0	0
Zwint	1000	7287.09	7045.34	7214.11	7383.69	6959.75	6379.13	10128.8	9993.02	7265.09	7073.79	6613.63	6541.99	7438.42	7203.92	6123.16	10397.4	9527.23	10400.6	10121.8	9860.48	9046.69	11523.5	9873.89	10862.9	11294.6	7813.79	9187.28	8355.51	8674.54	10402.2
A330049N07Rik	1000	45.7516	100.553	59.3263	53.7959	79.9397	33.1825	63.3484	52.2876	63.8512	72.3982	51.2821	66.8678	51.2821	96.5309	60.3318	145.299	116.642	173.454	131.222	186.023	117.647	180.995	137.758	120.664	216.189	128.708	110.106	152.338	175.465	115.636
Pcdh15	1000	40.7831	55.7953	48.1641	46.9131	43.3477	39.5947	109.089	87.6963	46.1	52.2925	41.0959	36.1544	43.723	43.9732	30.3371	57.7344	59.048	60.3615	56.9838	63.9895	56.7336	70.182	51.4793	65.3031	85.6321	45.7247	53.481	50.9164	56.671	54.2316
Rsph14	1000	13.9002	9.81194	13.0826	4.08831	13.9002	11.4473	7.35895	8.17661	8.17661	9.81194	5.72363	28.6182	5.72363	15.5356	5.72363	10.6296	28.6182	15.5356	8.17661	36.7948	15.5356	33.5241	20.4415	31.8888	22.0769	14.7179	19.6239	17.9886	26.1652	8.17661
Gnaz	1000	1138.4	1077.21	1171.66	1167.56	1097.33	1023	1359.34	1226.28	1101.03	979.877	959.754	1065.71	1227.93	1214.37	997.125	889.938	913.758	1001.64	1008.62	951.951	818.48	1072.69	957.7	1094.87	1119.1	762.218	898.563	843.532	845.996	1107.6
Rab36	1000	495.42	466.031	531.298	511.45	472.137	447.328	438.168	478.244	434.351	476.718	454.58	524.809	590.84	519.466	474.809	551.145	672.519	733.969	509.542	629.008	410.305	579.389	593.893	703.817	658.015	538.168	682.824	719.084	715.649	528.626
Bcr	1000	1117.49	1319.72	1306.87	1310.69	1193.67	1100.5	960.838	939.728	1132.02	1072.2	1217.84	1235.89	1670.34	1532.2	1313.6	3150.53	2909.74	3012.54	2305.34	2787.98	1857.73	2762.12	2993.27	2768.55	2634.85	3545.82	4032.58	3887.72	4318.65	3006.27
Specc1l	1000	488.35	538.055	573.936	522.678	471.264	488.04	442.684	422.957	471.73	447.655	464.896	487.108	569.897	531.376	457.285	669.618	641.348	774.775	579.528	648.959	542.094	696.956	668.997	664.181	740.758	609.972	599.41	631.252	659.366	583.566
Adora2a	1000	34.9462	33.7942	46.467	35.3303	36.0983	40.7066	49.9232	178.187	28.8018	36.8664	41.4747	35.7143	44.9309	44.5469	37.6344	5364.44	4043.78	5024.19	3722.73	4716.59	3054.53	4425.5	5273.43	4008.45	3545.7	6783.41	7093.7	8304.15	8385.56	4982.72
Gm5779	1000	1.10254	1.10254	1.10254	0	0	0	0	0	0	0	0	0	0	1.10254	0	3.30761	2.20507	1.10254	4.41014	3.30761	0	0	0	2.20507	2.20507	2.20507	2.20507	7.71775	2.20507	1.10254
Upb1	1000	0.328731	6.24589	105.194	2.62985	4.93097	2.95858	0.986193	1.64366	85.4701	21.6963	3.94477	7.88955	72.6496	9.5332	60.4865	34.188	21.0388	71.9921	19.3951	23.9974	22.6824	17.094	26.956	33.5306	31.8869	56.8705	48.9809	64.76	60.1578	48.3235
4933407G14Rik	1000	0	0	0	0	0	0	0	0.792393	0	0	0	0	0	0	0	0	0	0	0	0	0	0	0	0	0	0	0	0	0.792393	0
Gucd1	1000	204.811	239.519	303.78	231.271	212.715	230.584	240.206	203.78	243.986	224.742	230.584	253.265	304.467	249.141	271.478	290.378	254.983	395.876	268.041	268.041	235.739	289.003	301.375	362.887	294.502	322.337	287.973	261.168	285.911	317.182
Snrpd3	1000	2584.44	2372.52	2678.81	2629.14	2380.79	2215.23	2119.21	2039.74	2377.48	2198.68	2453.64	2506.62	2907.28	2587.75	2266.56	2620.86	2266.56	2639.07	2408.94	2367.55	2087.75	2629.14	2488.41	2746.69	2687.09	2319.54	2350.99	2382.45	2375.83	2569.54
Lrrc75b	1000	167.79	179.092	176.483	163.225	166.268	153.01	210.824	173.875	155.618	168.659	171.484	178.005	205.39	195.392	170.398	210.824	167.138	212.345	182.352	207.346	208.65	266.899	214.084	199.957	247.338	228.646	200.826	213.867	263.638	231.906
Ggt1	1000	39.2682	59.7947	49.0852	44.1767	44.1767	43.7305	46.8541	37.4833	30.3436	42.3918	38.3757	26.7738	40.6069	36.1446	29.8974	68.2731	57.1174	102.633	69.1656	61.1334	43.2842	60.241	61.5797	59.7947	77.1977	66.0419	51.3164	47.3003	48.1928	47.3003
Ggt5	1000	21.2715	24.1721	29.49	23.2052	23.6887	32.3906	30.6986	29.0065	18.8542	35.0496	27.3145	27.0728	31.9072	31.182	17.8874	24.8973	22.4801	54.629	25.6224	18.8542	18.1291	23.9304	39.4005	58.0131	41.576	49.3111	30.6986	19.3377	24.4138	25.139
Susd2	1000	27.957	53.149	40.553	48.8479	45.1613	38.0952	201.536	192.012	38.4025	64.2089	50.9985	45.7757	42.3963	57.1429	39.9386	102.304	100.768	110.906	90.937	85.0998	111.828	126.882	96.467	114.9	147.465	102.919	118.28	84.1782	82.6421	199.386
Cabin1	1000	680.697	702.413	779.759	743.566	685.791	657.641	736.461	727.48	659.651	689.276	661.93	709.249	847.855	724.397	676.408	668.097	672.118	753.217	607.373	644.102	553.083	728.552	676.542	776.273	792.493	632.44	701.475	677.748	736.059	644.504
Ddt	1000	1054.19	1356.32	1727.42	1364.53	1105.09	1220.03	1400.66	998.358	1453.2	1461.41	1185.55	1164.2	1622.33	1175.7	1415.44	1463.05	1295.57	1934.32	1550.08	1589.49	1374.38	1860.43	1469.62	1515.6	1947.45	1722.5	1453.2	1436.78	1719.21	1727.42
Gstt3	1000	81.6871	93.433	227.977	95.5686	93.433	98.2381	92.3652	77.4159	95.5686	96.1025	88.094	85.4245	138.281	108.382	121.196	121.73	115.323	238.121	100.374	122.264	84.8905	137.213	131.34	162.84	158.569	174.586	127.069	126.001	128.137	96.1025
Gstt1	1000	246.866	341.369	569.913	267.117	229.508	268.081	509.161	420.444	466.731	368.37	244.937	223.722	393.443	196.721	270.01	265.188	266.152	472.517	290.26	312.44	224.687	324.012	307.618	424.301	432.015	371.263	303.761	262.295	270.01	300.868
Gstt4	1000	1.03842	0	0	3.11526	0	0	1.03842	0	0	0	0	0	0	0	0	2.07684	0	0	0	0	0	0	0	1.03842	0	0	0	1.03842	1.03842	0
Gstt2	1000	41.6058	59.1241	97.8102	50.365	46.7153	43.7956	54.7445	48.1752	53.2847	67.8832	36.4964	40.146	82.4818	56.9343	54.0146	39.4161	45.2555	147.445	50.365	56.2044	43.0657	60.5839	68.6131	100.73	100	78.8321	46.7153	51.8248	59.1241	70.8029
Mif	1000	6559.57	7131.77	7167.87	6790.61	6368.23	5981.95	7700.36	6745.49	6471.12	6602.89	6848.38	6081.23	7593.86	6669.68	6232.85	7525.27	7111.91	9126.35	7713	6859.21	6550.54	8821.3	7819.49	8425.99	8978.34	6936.82	6940.43	7480.14	7346.57	8158.84
Derl3	1000	37.4251	28.4431	31.4371	49.4012	22.4551	24.7006	17.2156	34.4311	17.2156	25.4491	35.9281	25.4491	25.4491	25.4491	34.4311	40.4192	37.4251	45.6587	46.4072	50.1497	42.6647	38.9222	38.1737	35.1796	29.9401	31.4371	58.3832	56.8862	50.8982	52.3952
Smarcb1	1000	1573.33	1747.74	1774.89	1727.22	1572.12	1520.82	1517.8	1420.64	1482.2	1627.04	1601.69	1553.41	1882.92	1610.14	1575.74	2104.41	1945.08	2264.94	1902.84	1948.1	1622.21	2197.34	2150.27	2195.53	2191.31	1719.37	1888.96	2042.85	2070.01	1899.82
Mmp11	1000	38.0245	45.0175	49.8252	44.5804	42.3951	42.8322	55.9441	48.514	36.7133	42.8322	52.4476	33.2168	38.0245	36.7133	43.2692	69.0559	67.3077	72.1154	50.2622	82.6049	60.3147	81.7308	73.8636	93.9685	92.2203	63.8112	55.0699	66.4336	76.486	55.9441
Chchd10	1000	4168.78	4820.68	5388.19	4887.13	4597.05	4766.88	6648.73	4836.5	4660.34	5075.95	5270.04	4681.43	5534.81	5159.28	4872.36	8747.89	8411.39	10991.6	8675.11	8732.07	7294.3	10635	9975.74	10149.8	9017.93	9406.12	8783.76	9535.86	10281.6	8992.62
Gm867	1000	65.9609	65.1466	36.645	26.873	53.7459	38.2736	25.2443	30.9446	51.3029	66.7752	25.2443	76.5472	31.759	55.3746	39.9023	62.7036	166.938	103.42	65.1466	139.251	55.3746	114.007	78.9902	175.081	131.107	38.2736	135.993	110.749	149.023	68.4039
Vpreb3	1000	1.66113	3.32226	4.98339	1.66113	1.66113	3.32226	0	4.98339	1.66113	3.32226	1.66113	4.98339	4.98339	1.66113	9.96678	4.98339	11.6279	4.98339	9.96678	9.96678	4.98339	4.98339	3.32226	9.96678	11.6279	4.98339	9.96678	18.2724	21.5947	1.66113
Gm5134	1000	2.11566	2.11566	3.52609	1.41044	0.352609	2.11566	1.05783	0.352609	2.82087	3.17348	1.05783	2.11566	1.41044	2.46827	4.93653	1.41044	0	1.41044	1.05783	0.352609	3.52609	2.82087	1.05783	5.28914	0	1.76305	3.17348	1.41044	0.352609	4.23131
Mir6409	1000	0	0	0	0	0	0	0	0	0	0	0	0	0	0	0	0	0	0	0	0	0	0	0	0	0	0	0	0	0	0
Zfp280b	1000	242.101	233.484	241.075	236.356	218.301	216.249	190.193	174.6	198.4	205.786	215.018	229.791	269.799	224.251	215.634	297.702	302.011	331.145	268.363	307.961	224.251	338.531	302.011	331.555	320.066	266.311	284.776	287.444	277.801	281.288
Slc5a4b	1000	0	0	0	0	0	0.938086	0	0	0	0	1.40713	0	0	0	0	2.34522	2.81426	0.469043	1.40713	3.2833	0.938086	0.469043	4.22139	4.22139	2.81426	2.81426	3.75235	3.75235	3.75235	3.2833
Slc5a4a	1000	0	0	0	0	0	0	0	0.486618	0.973236	0.973236	0	0	0	0	0	0	0	0	0.486618	0	0	0.486618	0	0	0	0.486618	0	0	0	0
Prmt2	1000	1155	1300.91	1214.09	1248.18	1319.09	1134.09	1029.09	1134.55	1159.55	1122.73	1102.73	1124.55	1361.82	1380	1147.27	976.818	1005	1083.64	920	900.455	830	1136.36	900.455	1063.18	1023.18	793.636	1021.36	913.182	928.636	1016.82
Mir678	1000	0	0	0	0	0	0	0	0	0	0	0	0	0	0	0	0	0	0	0	0	0	0	0	0	0	0	0	0	0	0
S100b	1000	2936.18	3908.49	3555.09	3481.64	3254.67	3007.22	3237.81	2553.88	3310.05	4243.83	3096.93	3137.87	3167.97	3310.66	2694.16	5646.6	4275.74	5243.83	5274.53	5521.37	5215.53	6571.94	5569.54	4839.25	7452.74	4700.18	3644.79	4581.58	5071.04	4716.44
Dip2a	1000	590.087	885.602	657.12	706.216	756.098	558.773	809.284	707.789	660.425	734.382	684.028	749.331	683.714	1032.42	682.455	840.755	704.485	883.084	841.699	853.186	875.059	1036.51	796.696	843.43	1186.94	899.135	765.067	877.734	997.797	915.972
Pcnt	1000	211.018	209.339	229.276	226.023	208.395	197.377	233.893	179.328	185.31	224.974	204.932	183.421	245.96	219.832	182.791	221.406	215.425	251.312	201.049	221.826	197.692	240.504	221.196	242.707	261.28	199.895	215.005	207.87	224.344	215.005
1700094J05Rik	1000	0	0	0	0	0	0	0	0	0	1.00301	0	0	0	0	1.00301	1.00301	0	0	3.00903	0	0	0	1.00301	0	1.00301	1.00301	0	0	0	0
2610028H24Rik	1000	5.67215	0	1.70164	1.13443	4.53772	3.40329	0	1.70164	3.40329	0.567215	1.13443	8.50822	0.567215	2.26886	2.26886	2.26886	13.6132	5.67215	6.80658	9.64265	7.37379	6.23936	4.53772	6.80658	3.9705	4.53772	7.94101	11.9115	5.67215	4.53772
Ybey	1000	64.5732	55.0641	66.5635	64.3521	54.6218	53.9584	63.6886	49.9779	55.2853	58.6024	60.8138	55.5064	56.8333	53.7373	52.4104	69.2172	56.8333	74.7457	70.544	63.4675	55.2853	76.5148	55.0641	57.7178	71.6497	65.2366	68.996	59.2658	56.8333	61.6984
Mcm3ap	1000	519.662	528.748	584.051	568.071	494.125	483.628	436.002	428.639	489.738	458.875	533.918	542.378	660.034	588.281	534.702	589.691	611.311	663.168	537.208	585.461	469.215	638.885	624.001	643.428	653.454	573.241	662.854	594.391	643.585	598.778
Lss	1000	272.871	282.351	302.259	267.341	250.909	261.021	390.583	352.978	266.709	280.771	265.445	256.597	348.554	305.736	275.715	295.781	284.563	456.154	312.214	313.162	277.453	370.675	350.924	377.153	416.97	320.272	291.357	338.284	358.824	345.394
4930483K19Rik	1000	0	0	0	0	0	0	0	0	0	0	0	0	0	0	0	0	0	0	0	0	0	0	0	0	0	0	0	0	0	0
Spatc1l	1000	1.50263	3.00526	2.25394	2.25394	3.00526	2.25394	3.00526	2.25394	1.50263	0.751315	3.75657	0.751315	3.00526	3.00526	0.751315	1.50263	0.751315	1.50263	3.00526	1.50263	0	0.751315	4.50789	0.751315	1.50263	0	3.75657	4.50789	1.50263	0.751315
Ftcd	1000	0.369004	4.42804	71.2177	0.369004	2.21402	0.738007	2.58303	1.47601	76.0148	20.6642	4.42804	15.8672	92.2509	9.5941	57.9336	10.7011	9.9631	32.4723	7.01107	9.5941	3.69004	4.42804	5.90406	11.0701	18.0812	4.42804	4.79705	5.90406	8.48708	6.64207
[truncated: 22,595 more rows]

## Sheet: Supp.Table_2
List of DEG in HET striatum or hippocampus and indication whether their overlap with the other tissue or with Geomic dataset
[truncated: 8,649 more rows]

[truncated: 7 more sheets: Supp.Table_3, Supp.Table_4, Supp.Table_5, Supp.Table_6, Supp.Table_7, Supp.Table_8, Supp.Table_9]
